# Supplementary material for: Chinese Traditional Medicine NiuBeiXiaoHe (NBXH) Extracts Have the Function of Antituberculosis and Immune Recovery in BALB/c Mice
Source: J Immunol Res. 2021 Jan 18;2021:6234560. doi: 10.1155/2021/6234560 (PMC7857905; doi:10.1155/2021/6234560)
Supplement: Supplementary Materials — Figure S1: GO BP, CC, and MF classification between before and after M. tuberculosis infection or NBXH-H treatment. The number of up- or downregulated DE genes in the top 10 terms of the biological process, cellular component, and molecular function classification was determined from the Water vs. NC group (A–F) or the NBXH-H vs. Water group (G–L). Table S1: differentially expressed genes (pass volcano plot). Table S2: significant up- or downregulated pathways. [file 6234560.f1.zip › Table S1 Differentially Expressed Genes (Pass Volcano Plot).xlsx]

## Sheet: Water vs NC_up
	P-value Fold change and Regulation				Annotations								Group-Raw Intensity		Group-Normalized Intensity		Raw Intensity						Normalized Intensity
ProbeName	p-value	FDR	FCAbsolute	regulation	GenbankAccession	GenomicCoordinates	GeneSymbol	Description	Go	RefSeqAccession	UniGeneID	EntrezGeneID	[C2](raw)	[C1](raw)	[C2](normalized)	[C1](normalized)	[001](raw)	[002](raw)	[003](raw)	[101](raw)	[104](raw)	[108](raw)	[001](normalized)	[002](normalized)	[003](normalized)	[101](normalized)	[104](normalized)	[108](normalized)
A_52_P432780	3.29796e-11	3.10318e-07	2.36846	up	NM_178603	chr4:49527148-49527089	Mrpl50	Mus musculus mitochondrial ribosomal protein L50 (Mrpl50), mRNA [NM_178603]	GO:0005739|GO:0008150|GO:0003674|GO:0030529|GO:0005840	NM_178603	Mm.30052	28028	308.855	1406.73	8.2333	9.47725	312.035	305.493	309.036	1394.16	1406.85	1419.19	8.23008	8.23658	8.23324	9.47709	9.47677	9.47789
A_55_P2126695	5.75753e-11	3.10318e-07	36.4702	up	XM_619114	chr13:65517697-65517756	Gm5792	PREDICTED: Mus musculus predicted pseudogene 5792 (Gm5792), mRNA [XM_619114]		XM_619114		544944	5	384.587	2.37858	7.56722	5	5	5	373.704	388.959	391.097	2.37763	2.37576	2.38233	7.54951	7.57792	7.57424
A_51_P274465	1.16593e-10	3.10318e-07	8.23394	up	Y08485	chr10:87932348-87935438	Sycp3	M.musculus mRNA for synaptonemal complex protein. [Y08485]	GO:0005515|GO:0000793|GO:0015979|GO:0005634|GO:0007283|GO:0016321|GO:0007130|GO:0000794|GO:0043066|GO:0000795|GO:0046982|GO:0005694|GO:0000802|GO:0000800|GO:0003677|GO:0007129|GO:0007067|GO:0007049|GO:0007126|GO:0051026|GO:0051309|GO:0001673|GO:0007066|GO:0035093|GO:0051301		Mm.297977	20962	5	80.9066	2.37858	5.42016	5	5	5	79.6087	80.7741	82.337	2.37763	2.37576	2.38233	5.4264	5.408	5.42608
A_55_P2023772	1.38825e-10	3.10318e-07	2.43042	up	NM_025626	chr2:3699191-3699250	Fam107b	Mus musculus family with sequence similarity 107, member B (Fam107b), mRNA [NM_025626]	GO:0008150|GO:0003674|GO:0005575	NM_025626	Mm.277864	66540	20640.4	67650.5	14.7469	16.0281	21183	20277.5	20460.5	69358.7	67009.1	66583.8	14.7522	14.7442	14.7442	16.0262	16.029	16.029
A_52_P414267	1.92144e-10	3.10318e-07	2.46491	up	NM_001015507	chr9:106766927-106767396	Vprbp	Mus musculus Vpr (HIV-1) binding protein (Vprbp), mRNA [NM_001015507]	GO:0005737|GO:0008180|GO:0005634	NM_001015507	Mm.440089	321006	66.0818	270.535	5.78074	7.08227	66.553	66.1443	65.5481	267.099	269.958	274.548	5.77752	5.78111	5.78358	7.0842	7.07722	7.0854
A_55_P2185686	2.03211e-10	3.10318e-07	9.91505	up		chr11:52051767-52051826	Skp1a	S-phase kinase-associated protein 1A [Source:MGI Symbol;Acc:MGI:103575] [ENSMUST00000093121]	GO:0031519|GO:0005515|GO:0035518|GO:0006511|GO:0004842|GO:0016567|GO:0031467|GO:0031146|GO:0019005|GO:0005829			21402	5	97.5793	2.37858	5.6882	5	5	5	95.5925	97.1608	99.9847	2.37763	2.37576	2.38233	5.68307	5.67811	5.70341
A_52_P100926	2.41683e-10	3.10318e-07	17.1242	up	NM_010554	chr2:129126053-129125994	Il1a	Mus musculus interleukin 1 alpha (Il1a), mRNA [NM_010554]	GO:0032755|GO:0008285|GO:0019221|GO:0031424|GO:0046330|GO:0032874|GO:0050715|GO:0005615|GO:0010893|GO:0035234|GO:0005829|GO:0034605|GO:0006955|GO:0006954|GO:0045944|GO:0001660|GO:0051781|GO:0070374|GO:0043123|GO:0005149|GO:0009986|GO:0005507|GO:0005576|GO:0045840|GO:0010575|GO:0005125|GO:0045766|GO:0097192|GO:0045086|GO:0046688|GO:0051930	NM_010554	Mm.15534	16175	5.8921	192.6	2.51529	6.61325	5.83204	6.33822	5.50605	189.056	192.667	196.078	2.5025	2.5089	2.53446	6.61056	6.60926	6.61993
A_66_P136097	4.40852e-10	3.10318e-07	7.63794	up	NM_001164220	chr14:62224482-62224541	Trim13	Mus musculus tripartite motif-containing 13 (Trim13), transcript variant 1, mRNA [NM_001164220]	GO:0004842|GO:0005783|GO:0016874|GO:0030433|GO:0097038|GO:0046872|GO:0051865|GO:0005622|GO:0007165|GO:0005737|GO:0016020|GO:0005789|GO:0043161|GO:0008270|GO:0004871|GO:0016021|GO:0043123|GO:0010942|GO:0016239	NM_001164220	Mm.491258	66597	256.076	3526.83	7.94562	10.8788	260.341	249.96	257.928	3511.15	3533.85	3535.48	7.9429	7.93472	7.95926	10.8862	10.8801	10.8702
A_55_P2151082	5.68357e-10	3.10318e-07	2.77	up									1742.45	9357.74	10.9613	12.4312	1769.62	1723.74	1733.98	9342.87	9363.34	9367.01	10.958	10.9673	10.9585	12.4363	12.4326	12.4246
A_52_P425839	6.43249e-10	3.10318e-07	7.84303	up	NM_181596	chr16:48874468-48874527	Retnlg	Mus musculus resistin like gamma (Retnlg), mRNA [NM_181596]	GO:0003674|GO:0002408|GO:0005615	NM_181596	Mm.231288	245195	612.618	8522.13	9.3135	12.2849	626.528	600.139	611.188	8378.93	8562.94	8624.5	9.32267	9.3101	9.30772	12.2682	12.2927	12.2939
A_51_P114854	6.72815e-10	3.10318e-07	2.22056	up	NM_023671	chr7:104865038-104866776	Clns1a	Mus musculus chloride channel, nucleotide-sensitive, 1A (Clns1a), mRNA [NM_023671]	GO:0006821|GO:0005737|GO:0005634|GO:0006884|GO:0005829	NM_023671	Mm.21482	12729	949.583	4208.91	10.0231	11.174	965.569	931.027	952.153	4166.09	4204.49	4256.14	10.0241	10.0179	10.0272	11.173	11.1701	11.1789
A_55_P2076871	6.75037e-10	3.10318e-07	6.31201	up	NM_010703	chr3:130926200-130926259	Lef1	Mus musculus lymphoid enhancer binding factor 1 (Lef1), transcript variant 1, mRNA [NM_010703]	GO:0005515|GO:0003700|GO:0008013|GO:0006366|GO:0030111|GO:0030307|GO:0032714|GO:0003705|GO:0001756|GO:0032713|GO:0001755|GO:0030879|GO:0021861|GO:0032993|GO:0016055|GO:0043027|GO:0001944|GO:0021542|GO:0022407|GO:0022408|GO:0000977|GO:0022409|GO:0030335|GO:0033153|GO:0008301|GO:0021879|GO:0030331|GO:0000122|GO:0030509|GO:0021873|GO:0035326|GO:0001649|GO:0043392|GO:0008134|GO:0008284|GO:0010718|GO:…	NM_010703	Mm.255219	16842	2007.98	22538.5	11.1866	13.8447	2039.35	1965.49	2019.09	22562.1	22488.3	22565.1	11.1918	11.1712	11.1968	13.8422	13.852	13.8399
A_55_P2125912	7.1851e-10	3.10318e-07	2.74183	up	NM_009838	chr5:130300316-130300375	Cct6a	Mus musculus chaperonin containing Tcp1, subunit 6a (zeta) (Cct6a), mRNA [NM_009838]	GO:0005515|GO:0001669|GO:0005832|GO:0005874|GO:0007339|GO:0005524|GO:0044297|GO:0005737|GO:0000166|GO:0006457|GO:0002199|GO:0051082|GO:0044267	NM_009838	Mm.360232	12466	1208.52	6538.36	10.3912	11.8464	1231.9	1192.99	1200.66	6489.77	6528.05	6597.25	10.3923	10.399	10.3825	11.8469	11.8453	11.8469
A_55_P2090633	7.94228e-10	3.15174e-07	7.19646	up	NM_011200	chr1:30999868-30999809	Ptp4a1	Mus musculus protein tyrosine phosphatase 4a1 (Ptp4a1), mRNA [NM_011200]	GO:0030335|GO:0005886|GO:0005783|GO:0005634|GO:0007275|GO:0035335|GO:0016791|GO:0005737|GO:0007049|GO:0006470|GO:0016787|GO:0016020|GO:0016311|GO:0009898|GO:0004721|GO:0004727|GO:0005856|GO:0004725|GO:0005768	NM_011200	Mm.491181	19243	613.712	7882.1	9.31476	12.162	626.243	598.679	616.213	7918.55	7835.96	7891.78	9.3214	9.30528	9.31759	12.1787	12.1531	12.1544
A_55_P1954724	1.0178e-09	3.36166e-07	3.95792	up	XR_104972	chr6:18796209-18796150	Gm20186	PREDICTED: Mus musculus predicted gene, 20186 (Gm20186), misc_RNA [XR_104972]		XR_104972	Mm.332931	100504344	15049.5	71794.1	14.1749	16.1596	15329.8	14971	14847.7	73547.4	71221.7	70613.2	14.1765	14.1863	14.1618	16.1603	16.1603	16.1583
A_55_P2014189	1.03893e-09	3.36166e-07	2.29972	up		chr9:067595186-067595127							350.079	1560.97	8.43858	9.64004	356.665	345.348	348.225	1548.57	1556.28	1578.05	8.44281	8.44191	8.43103	9.64314	9.6359	9.64109
A_52_P335508	1.08502e-09	3.40599e-07	4.21696	up	NM_145513	chr1:167145789-167145730	Tiprl	Mus musculus TIP41, TOR signalling pathway regulator-like (S. cerevisiae) (Tiprl), mRNA [NM_145513]	GO:0003674|GO:0005737|GO:0005575|GO:0000077|GO:0034048	NM_145513	Mm.21520	226591	944.345	7556.09	10.0155	12.0917	956.198	930.256	946.582	7499.41	7492.52	7676.35	10.0111	10.0171	10.0184	12.0913	12.0794	12.1046
A_52_P503104	1.15609e-09	3.57269e-07	2.23606	up	NM_001033215	chr14:79612364-79612305	Zfp957	Mus musculus zinc finger protein 957 (Zfp957), mRNA [NM_001033215]	GO:0008150|GO:0003674|GO:0005575	NM_001033215	Mm.486536	105590	141.19	595.286	7.0262	8.18716	142.207	139.829	141.533	587.306	595.297	603.255	7.0206	7.02465	7.03335	8.18386	8.18645	8.19116
A_52_P640386	1.20426e-09	3.57269e-07	2.84397	up	NM_133857	chr3:122636794-122636735	Usp53	Mus musculus ubiquitin specific peptidase 53 (Usp53), mRNA [NM_133857]	GO:0008150|GO:0006511|GO:0003674|GO:0005575|GO:0004221	NM_133857	Mm.491248	99526	263.813	1425.26	7.98945	9.49735	268.819	260.835	261.786	1406.21	1426.48	1443.1	7.99466	7.99356	7.98013	9.49217	9.49662	9.50327
A_55_P2176530	1.26465e-09	3.57269e-07	2.00202	up	NM_001167768	chr12:8282636-8282695	1110057K04Rik	Mus musculus RIKEN cDNA 1110057K04 gene (1110057K04Rik), transcript variant 3, mRNA [NM_001167768]	GO:0008150|GO:0003674|GO:0005575	NM_001167768	Mm.25608	68832	124.234	462.601	6.82238	7.82384	125.711	123.89	123.102	457.276	461.189	469.337	6.8266	6.81756	6.82298	7.82726	7.81836	7.82589
A_51_P104418	1.34709e-09	3.57269e-07	9.24763	up	NM_022019	chr1:185898608-185898667	Dusp10	Mus musculus dual specificity phosphatase 10 (Dusp10), mRNA [NM_022019]	GO:0033549|GO:0005794|GO:0005634|GO:0060266|GO:0032873|GO:0000188|GO:0002819|GO:0016791|GO:0005737|GO:0046329|GO:0006470|GO:0016787|GO:0016311|GO:0045088|GO:0032496|GO:0004721|GO:0008138|GO:0043508|GO:0004725|GO:0017017	NM_022019	Mm.404024	63953	1607.77	25321.7	10.8315	14.0406	1629.17	1570.86	1623.28	25240.7	25394.8	25329.5	10.8268	10.8196	10.8482	14.0239	14.0547	14.0432
A_52_P465886	1.35945e-09	3.57269e-07	3.27202	up	NM_026240	chr18:56657022-56662255	Gramd3	Mus musculus GRAM domain containing 3 (Gramd3), mRNA [NM_026240]	GO:0008150|GO:0005881|GO:0003674	NM_026240	Mm.24356	107022	2113.64	13394.5	11.2644	12.9745	2148.36	2081.51	2111.06	13259.1	13413.4	13510.8	11.2691	11.2583	11.2657	12.963	12.9818	12.9789
A_55_P2015258	1.71155e-09	3.86214e-07	7.5834	up	NM_001164220	chr14:62224545-62224604	Trim13	Mus musculus tripartite motif-containing 13 (Trim13), transcript variant 1, mRNA [NM_001164220]	GO:0004842|GO:0005783|GO:0016874|GO:0030433|GO:0097038|GO:0046872|GO:0051865|GO:0005622|GO:0007165|GO:0005737|GO:0016020|GO:0005789|GO:0043161|GO:0008270|GO:0004871|GO:0016021|GO:0043123|GO:0010942|GO:0016239	NM_001164220	Mm.491258	66597	301.829	4068.19	8.19788	11.1207	302.054	301.379	302.055	4030.72	4044.38	4129.47	8.1786	8.21343	8.20161	11.1217	11.1093	11.1311
A_52_P678117	1.94551e-09	3.86214e-07	3.71465	up	NM_011273	chr1:157137337-157130518	Xpr1	Mus musculus xenotropic and polytropic retrovirus receptor 1 (Xpr1), mRNA [NM_011273]	GO:0016020|GO:0005886|GO:0001618|GO:0004872|GO:0016021|GO:0009615	NM_011273	Mm.266215	19775	55.5042	335.085	5.4847	7.37793	55.7726	55.5999	55.1399	329.006	337.964	338.284	5.47567	5.48324	5.49519	7.36676	7.38529	7.38173
A_51_P164203	1.97961e-09	3.86214e-07	2.43311	up	NM_019731	chr17:26228811-26228752	Nme4	Mus musculus NME/NM23 nucleoside diphosphate kinase 4 (Nme4), mRNA [NM_019731]	GO:0006241|GO:0004550|GO:0005524|GO:0032403|GO:0046872|GO:0005739|GO:0006165|GO:0006228|GO:0006183|GO:0016310|GO:0000166|GO:0016301|GO:0009117|GO:0016740	NM_019731	Mm.41787	56520	272.865	1273.26	8.04006	9.32287	277.469	269.777	271.35	1257.77	1268.79	1293.23	8.04352	8.03902	8.03765	9.32267	9.31401	9.33192
A_55_P1971159	2.00538e-09	3.86214e-07	3.58869	up		chr15:041754043-041754102							869.433	6062.47	9.88132	11.7248	876.522	857.345	874.432	5975.45	6101.25	6110.73	9.87203	9.87936	9.89255	11.7176	11.7347	11.7221
A_55_P2028496	2.17231e-09	3.87781e-07	2.3677	up		chrX:138304129-138304070							5111.67	21819.5	12.5493	13.7928	5168.34	5036.01	5130.66	21770.5	21749.6	21938.4	12.5444	12.5471	12.5563	13.7848	13.7955	13.7979
A_55_P2185323	2.20615e-09	3.87781e-07	5.68456	up	NM_001033300	chr3:63822814-63822873	Gmps	Mus musculus guanine monophosphate synthetase (Gmps), mRNA [NM_001033300]	GO:0016462|GO:0005737|GO:0006177|GO:0000166|GO:0016874|GO:0003922|GO:0005524|GO:0003921|GO:0006541|GO:0006164|GO:0005829	NM_001033300	Mm.331051	229363	26.5676	222.322	4.30778	6.81483	26.8735	27.1284	25.701	219.692	220.46	226.813	4.31266	4.31505	4.29563	6.8158	6.79857	6.83011
A_55_P2119011	2.26379e-09	3.87781e-07	3.21733	up	NM_133885	chr4:108775162-108775103	Osbpl9	Mus musculus oxysterol binding protein-like 9 (Osbpl9), transcript variant a, mRNA [NM_133885]	GO:0008150|GO:0003674|GO:0005794|GO:0016020|GO:0006869|GO:0006810|GO:0005575|GO:0008289|GO:0005768	NM_133885	Mm.366315	100273	435.725	2712.49	8.78783	10.4737	446.381	426.735	434.06	2680.57	2705	2751.9	8.79929	8.77998	8.78423	10.4735	10.4659	10.4817
A_55_P2004375	2.2839e-09	3.87781e-07	12.4961	up	NM_053111	chr14:52474253-52474312	Ear6	Mus musculus eosinophil-associated, ribonuclease A family, member 6 (Ear6), mRNA [NM_053111]	GO:0004518|GO:0004519|GO:0090305|GO:0016787|GO:0004540|GO:0005575	NM_053111	Mm.221324	93719	125.1	2719.76	6.83299	10.4764	125.071	124.692	125.538	2660.15	2750.5	2748.62	6.81831	6.8259	6.85475	10.4543	10.4939	10.481
A_51_P293607	2.33441e-09	3.8947e-07	3.18566	up	NM_025474	chr1:162130380-162130439	Mrps14	Mus musculus mitochondrial ribosomal protein S14 (Mrps14), mRNA [NM_025474]	GO:0005739|GO:0005622|GO:0008150|GO:0031965|GO:0003735|GO:0030529|GO:0005840|GO:0006412|GO:0005763	NM_025474	Mm.29599	64659	69.14	374.018	5.85801	7.5296	69.38	69.3706	68.6692	367.613	376.504	377.938	5.84605	5.86906	5.85891	7.52679	7.53615	7.52586
A_55_P1952768	2.3671e-09	3.8947e-07	8.14128	up		chr3:142274468-142274527							687.446	9848.97	9.4915	12.5168	695.927	670.96	695.45	9926.14	9822.52	9798.24	9.48546	9.48008	9.50896	12.5363	12.5116	12.5023
A_51_P149621	2.59245e-09	3.93766e-07	4.6594	up	NM_024222	chr9:115155313-115155254	Stt3b	Mus musculus STT3, subunit of the oligosaccharyltransferase complex, homolog B (S. cerevisiae) (Stt3b), mRNA [NM_024222]	GO:0004576|GO:0006986|GO:0005783|GO:0030433|GO:0016020|GO:0004579|GO:0043686|GO:0006516|GO:0006486|GO:0016021|GO:0016740|GO:0018279|GO:0043687	NM_024222	Mm.296158	68292	1171.55	10166.9	10.3454	12.5655	1200.94	1136.39	1177.33	10108.1	10159.4	10233.2	10.3559	10.3252	10.355	12.5662	12.5667	12.5637
A_52_P582555	2.75625e-09	3.93766e-07	3.39976	up	NM_172991	chr5:3590288-3590229	Rbm48	Mus musculus RNA binding motif protein 48 (Rbm48), mRNA [NM_172991]	GO:0008150|GO:0003674|GO:0003723|GO:0005634	NM_172991	Mm.38014	269623	326.041	2124.21	8.32266	10.0881	330.154	322.701	325.268	2085.2	2124.89	2162.55	8.31888	8.32682	8.32228	10.0768	10.0843	10.1032
A_55_P2062851	2.84365e-09	3.93766e-07	2.85661	up	NM_020575	chr2:60085955-60086014	March7	Mus musculus membrane-associated ring finger (C3HC4) 7 (March7), mRNA [NM_020575]	GO:0008150|GO:0003674|GO:0016874|GO:0008270|GO:0005575|GO:0046872	NM_020575	Mm.260635	57438	3529.66	18821.6	12.0294	13.5437	3574.68	3482.61	3531.68	18661	18877.8	18926	12.0195	12.0329	12.0358	13.5339	13.55	13.5473
A_55_P2071581	2.91487e-09	3.98088e-07	2.64691	up	XR_105120	chr7:80762806-80762747	Gm7710	PREDICTED: Mus musculus predicted gene 7710 (Gm7710), misc_RNA [XR_105120]		XR_105120	Mm.425462	665610	745.892	3868.15	9.62894	11.0332	754.486	736.113	747.077	3799.57	3879.32	3925.57	9.62342	9.63275	9.63064	11.022	11.0355	11.0423
A_55_P2052913	2.98902e-09	4.02239e-07	3.10976	up	X17631	chr12:114900181-114900122		Mouse mRNA for immunoglobulin mu heavy chain complete V-segment (VH238). [X17631]			Mm.438671		235.649	1387.19	7.81738	9.45419	240.787	232.521	233.638	1384.62	1382.71	1394.25	7.82589	7.81836	7.8079	9.46526	9.44624	9.45106
A_51_P341571	3.03037e-09	4.02239e-07	3.91792	up	NM_027117	chr12:70406693-70406826	Klhdc2	Mus musculus kelch domain containing 2 (Klhdc2), mRNA [NM_027117]	GO:0005515|GO:0008150|GO:0005634|GO:0005575	NM_027117	Mm.234368	69554	808.48	6076.06	9.75849	11.7286	818.975	803.454	803.012	5981.19	6059.05	6187.94	9.75326	9.76975	9.75244	11.7193	11.7231	11.7433
A_55_P1955687	3.1026e-09	4.05304e-07	3.93882	up	NM_001081264	chr4:99417429-99417488	Alg6	Mus musculus asparagine-linked glycosylation 6 (alpha-1,3,-glucosyltransferase) (Alg6), mRNA [NM_001081264]	GO:0016758|GO:0016020|GO:0016757|GO:0005783|GO:0005789|GO:0046527|GO:0016021|GO:0006487|GO:0005575|GO:0016740	NM_001081264	Mm.32408	320438	21.493	115.401	3.948	5.92576	21.679	22.1447	20.6553	113.918	116.737	115.549	3.9523	3.95594	3.93574	5.9291	5.93603	5.91215
A_55_P2097219	3.19129e-09	4.09264e-07	6.28805	up	NM_010259	chr3:142281466-142281525	Gbp2b	Mus musculus guanylate binding protein 2b (Gbp2b), mRNA [NM_010259]	GO:0005794|GO:0035458|GO:0050830|GO:0020005|GO:0003924|GO:0042832|GO:0005576|GO:0051856|GO:0031410|GO:0005525|GO:0051607|GO:0005737|GO:0071346|GO:0000166|GO:0016020|GO:0019002	NM_010259	Mm.457978	14468	1060.85	12208.7	10.1925	12.8451	1077.69	1037.46	1067.42	12072.5	12353.7	12200	10.1855	10.1835	10.2084	12.8332	12.8648	12.8373
A_52_P579640	3.25943e-09	4.09326e-07	2.05385	up	NM_021511	chr1:9537213-9537272	Rrs1	Mus musculus RRS1 ribosome biogenesis regulator homolog (S. cerevisiae) (Rrs1), mRNA [NM_021511]	GO:0005515|GO:0000794|GO:0005783|GO:0042254|GO:0005730|GO:0005634|GO:0007080	NM_021511	Mm.29061	59014	1004.4	4127.52	10.1067	11.145	1020.12	994.006	999.081	4070.76	4135.14	4176.66	10.106	10.1142	10.0998	11.1399	11.1455	11.1495
A_52_P173555	3.34567e-09	4.10877e-07	4.63713	up	NM_031162	chr1:167786567-167787585	Cd247	Mus musculus CD247 antigen (Cd247), transcript variant eta, mRNA [NM_031162]	GO:0005515|GO:0050852|GO:0042105|GO:0005737|GO:0016020|GO:0005886|GO:0042101|GO:0016021|GO:0007166|GO:0042802|GO:0004888	NM_031162	Mm.217308	12503	219.932	1908.06	7.71277	9.92601	224.291	217.568	217.937	1902.62	1887.62	1933.94	7.72015	7.71744	7.70073	9.93871	9.90891	9.9304
A_51_P141535	3.41392e-09	4.13139e-07	2.46225	up	NM_016978	chr7:139749785-139749726	Oat	Mus musculus ornithine aminotransferase (Oat), mRNA [NM_016978]	GO:0005739|GO:0005737|GO:0004587|GO:0030170|GO:0008483|GO:0003824|GO:0034214|GO:0016740	NM_016978	Mm.13694	18242	1118.06	5512.14	10.275	11.575	1144.86	1093.12	1116.2	5454.53	5523.16	5558.72	10.285	10.2653	10.2747	11.5695	11.579	11.5764
A_65_P01319	3.42473e-09	4.13139e-07	2.61121	up	NM_019840	chr4:102279393-102279452	Pde4b	Mus musculus phosphodiesterase 4B, cAMP specific (Pde4b), transcript variant 1, mRNA [NM_019840]	GO:0001780|GO:0050852|GO:0030018|GO:0048471|GO:0005634|GO:0050900|GO:0046872|GO:0005829|GO:0071944|GO:0006939|GO:0005737|GO:0030552|GO:0086004|GO:0006198|GO:0032729|GO:0004115|GO:0004114|GO:0032743|GO:0030593|GO:0005891|GO:0035690|GO:0044325|GO:0071222|GO:0016787|GO:0071872	NM_019840	Mm.20181	18578	2547.59	12949.2	11.5396	12.9243	2576.47	2510.07	2556.24	12972.1	12861.1	13014.5	11.5318	11.5373	11.5497	12.932	12.9174	12.9235
A_52_P8903	3.51116e-09	4.14869e-07	2.12038	up	NM_177140	chr12:103983133-103983192	Tmem251	Mus musculus transmembrane protein 251 (Tmem251), mRNA [NM_177140]	GO:0008150|GO:0003674|GO:0016020|GO:0016021|GO:0005575	NM_177140	Mm.86546	320351	1051.59	4450.58	10.1768	11.2611	1067.77	1033.64	1053.35	4435.18	4451.36	4465.21	10.1718	10.1763	10.1822	11.2697	11.2583	11.2553
A_52_P68893	3.54889e-09	4.16985e-07	4.40191	up	NM_008337	chr10:117882841-117882900	Ifng	Mus musculus interferon gamma (Ifng), mRNA [NM_008337]	GO:0005515|GO:0005615|GO:0030968|GO:0005622|GO:0045348|GO:0044130|GO:0042742|GO:0000060|GO:0045410|GO:0032760|GO:0030593|GO:0042832|GO:0000122|GO:0005125|GO:0045785|GO:0032224|GO:0045084|GO:0002026|GO:0050776|GO:0045893|GO:0048304|GO:0009897|GO:0040008|GO:0045080|GO:0001781|GO:0051044|GO:0008285|GO:0044146|GO:0005133|GO:0006925|GO:0032735|GO:0033141|GO:0045429|GO:0006955|GO:0050718|GO:0019882|GO:…	NM_008337	Mm.240327	15978	1211.14	9933.08	10.3944	12.5325	1229.7	1192.14	1211.59	9760.47	10040.7	9998.07	10.3904	10.3981	10.3946	12.516	12.5514	12.5301
A_51_P317272	3.83004e-09	4.3365e-07	2.40472	up	NM_001024919	chr11:31565433-31565374	Bod1	Mus musculus biorientation of chromosomes in cell division 1 (Bod1), mRNA [NM_001024919]	GO:0008150|GO:0003674|GO:0007067|GO:0007049|GO:0005737|GO:0005694|GO:0000776|GO:0005575|GO:0005856|GO:0000775|GO:0051301	NM_001024919	Mm.34183	69556	596.704	2812.42	9.27099	10.5369	603.279	588.106	598.727	2805.49	2800.12	2831.66	9.26197	9.27586	9.27515	10.5458	10.5326	10.5322
A_55_P1970033	3.91419e-09	4.3365e-07	4.57742	up	NM_011065	chr11:68923364-68923423	Per1	Mus musculus period circadian clock 1 (Per1), transcript variant 1, mRNA [NM_011065]	GO:0005515|GO:0000988|GO:0006355|GO:0070888|GO:0005634|GO:0000122|GO:0000978|GO:0006351|GO:0032922|GO:0007165|GO:0005737|GO:0007623|GO:0048511|GO:0004871|GO:0045892	NM_011065	Mm.7373	18626	2106.86	17729.3	11.2583	13.4528	2123.65	2108.29	2088.65	17724.4	17575	17888.5	11.2451	11.2795	11.2504	13.4502	13.4495	13.4587
A_66_P111163	3.96101e-09	4.3365e-07	4.95884	up	AK039793	chr14:53476381-53476440	Trav14n-1	Mus musculus 0 day neonate thymus cDNA, RIKEN full-length enriched library, clone:A430001D15 product:T-cell receptor alpha, variable 2.2, full insert sequence. [AK039793]			Mm.486824	100043204	342.479	3164.95	8.40272	10.7127	351.298	338.14	337.999	3119.52	3161.04	3214.3	8.41716	8.4079	8.38311	10.7047	10.7095	10.724
A_65_P17869	3.96771e-09	4.3365e-07	2.92959	up	NM_027332	chr3:146174069-146174010	Rpf1	Mus musculus ribosome production factor 1 homolog (S. cerevisiae) (Rpf1), transcript variant 1, mRNA [NM_027332]	GO:0008150|GO:0042254|GO:0006364|GO:0003723|GO:0005730|GO:0005634|GO:0019843	NM_027332	Mm.28128	70285	476.006	2713.53	8.92369	10.4744	481.864	469.763	476.389	2676.34	2704.87	2759.37	8.92068	8.92794	8.92245	10.4681	10.4656	10.4894
A_51_P123604	3.99082e-09	4.3365e-07	3.00131	up	NM_172807	chr13:104995717-104995658	Ppwd1	Mus musculus peptidylprolyl isomerase domain and WD repeat containing 1 (Ppwd1), mRNA [NM_172807]	GO:0008380|GO:0006397|GO:0008150|GO:0003674|GO:0006457|GO:0003755|GO:0005681|GO:0005634|GO:0071013|GO:0016853	NM_172807	Mm.98910	238831	226.657	1291.34	7.7598	9.34539	228.8	223.088	228.084	1270.79	1299.96	1303.29	7.75342	7.75483	7.77115	9.33594	9.35563	9.34461
A_51_P510663	4.08248e-09	4.3365e-07	2.95069	up	NM_178652	chr17:45170231-45173688	Supt3	Mus musculus suppressor of Ty 3 (Supt3), mRNA [NM_178652]	GO:0016578|GO:0043966|GO:0030914|GO:0003713|GO:0005634|GO:2001141|GO:0004402|GO:0033276	NM_178652	Mm.431327	109115	105.444	564.95	6.54873	8.10978	106.635	104.31	105.388	560.633	568.081	566.135	6.5428	6.54407	6.55932	8.11735	8.11395	8.09805
A_52_P399054	4.35365e-09	4.41284e-07	2.04403	up	NM_019770	chr5:124996912-124996971	Tmed2	Mus musculus transmembrane emp24 domain trafficking protein 2 (Tmed2), mRNA [NM_019770]	GO:0005793|GO:0005794|GO:0030137|GO:0005783|GO:0072661|GO:0001756|GO:0001843|GO:0001892|GO:0001701|GO:0006886|GO:0043231|GO:0001947|GO:0010628|GO:0003674|GO:0042589|GO:0035264|GO:0032525|GO:0007030|GO:0016021|GO:0034260	NM_019770	Mm.425279	56334	504.915	2073.46	9.01725	10.0487	516.504	495.715	502.526	2042.35	2077.99	2100.04	9.02619	9.01016	9.01539	10.0438	10.0498	10.0523
A_55_P2063396	4.42554e-09	4.41284e-07	6.78737	up	NM_133349	chr5:139947267-139947208	Zfand2a	Mus musculus zinc finger, AN1-type domain 2A (Zfand2a), transcript variant 1, mRNA [NM_133349]	GO:0005737|GO:0008270|GO:0005634|GO:0046872	NM_133349	Mm.24521	100494	1370.41	16759.8	10.5902	13.3531	1374.54	1373.42	1363.25	16790.3	16657.4	16831.6	10.5685	10.6156	10.5866	13.3614	13.3462	13.3517
A_55_P1978636	4.42892e-09	4.41284e-07	8.28392	up		chr9:3038257-3038316		predicted gene 10715 [Source:MGI Symbol;Acc:MGI:3642376] [ENSMUST00000177969]					124.25	1841.69	6.81989	9.8702	123.438	125.331	123.982	1799.75	1845.02	1880.31	6.79355	6.83285	6.83328	9.85573	9.86845	9.88644
A_55_P2142430	4.50039e-09	4.42279e-07	2.58351	up	NM_001033350	chr3:135727137-135727078	Bank1	Mus musculus B cell scaffold protein with ankyrin repeats 1 (Bank1), mRNA [NM_001033350]	GO:0005515|GO:0042113|GO:0019901|GO:0006874|GO:0005102	NM_001033350	Mm.30832	242248	1719.69	8643.25	10.9398	12.3092	1747.22	1695.55	1716.3	8516.56	8676.34	8736.85	10.9371	10.9439	10.9385	12.2956	12.3145	12.3175
A_52_P108346	4.52909e-09	4.42279e-07	2.18881	up	NM_010849	chr15:61821417-61821476	Myc	Mus musculus myelocytomatosis oncogene (Myc), transcript variant 1, mRNA [NM_010849]	GO:0000987|GO:0005515|GO:0010468|GO:0001658|GO:0003700|GO:0006366|GO:0032403|GO:0005622|GO:0006879|GO:0003690|GO:0045656|GO:0000165|GO:0016485|GO:0002904|GO:0045821|GO:0016055|GO:0010332|GO:0005819|GO:0043279|GO:0000122|GO:0043085|GO:0045787|GO:0043280|GO:0043234|GO:0044330|GO:0007007|GO:0005654|GO:0045893|GO:0006848|GO:0008134|GO:0032091|GO:0030424|GO:0001783|GO:0008284|GO:0008283|GO:0044337|GO:…	NM_010849	Mm.2444	17869	2747.71	11739.6	11.6568	12.787	2800.35	2703.18	2739.61	11767.9	11660.8	11790.1	11.6633	11.6508	11.6564	12.7951	12.7789	12.787
A_55_P1986019	4.54223e-09	4.42279e-07	4.05107	up	U26795	chr6:41012741-41012800	Tcrb-J	Mus musculus T cell receptor Vb1/Jb1.1 beta chain mRNA, isolate 729-3, partial cds. [U26795]			Mm.389744	21580	461.03	3553.11	8.87534	10.8936	470.045	453.257	459.788	3548.54	3573.21	3537.59	8.87723	8.87598	8.8728	10.9052	10.9031	10.8727
A_55_P1952414	4.62011e-09	4.44169e-07	2.64035	up	NM_001113214	chr2:29778000-29778059	Odf2	Mus musculus outer dense fiber of sperm tails 2 (Odf2), transcript variant 2, mRNA [NM_001113214]	GO:0005929|GO:0005813|GO:0005737|GO:0005814|GO:0005874|GO:0005200|GO:0007275|GO:0042995|GO:0007283|GO:0005856|GO:0030154	NM_001113214	Mm.330116	18286	292.486	1471.8	8.14877	9.54949	297.651	288.087	291.722	1456.51	1482.03	1476.85	8.15309	8.14177	8.15143	9.54992	9.5605	9.53806
A_65_P07827	4.78315e-09	4.45604e-07	4.77612	up	XR_168496	chr12:103212913-103212854	Gm2701	PREDICTED: Mus musculus predicted gene 2701 (Gm2701), misc_RNA [XR_168496]		XR_168496	Mm.390468	100040305	234.261	2095.29	7.80876	10.0646	241.435	229.56	231.787	2058.1	2092.66	2135.1	7.82843	7.80143	7.7964	10.0559	10.0602	10.0777
A_51_P104768	4.9594e-09	4.51296e-07	2.58312	up	JX120299	chr12:115822028-115821969		Mus musculus strain C57BL/6 clone 57 immunoglobulin heavy chain mRNA, partial cds. [JX120299]			Mm.423002		193.874	957.691	7.52231	8.89142	196.702	191.785	193.134	953.463	959.685	959.924	7.52058	7.52717	7.51917	8.90292	8.89232	8.87902
A_55_P1980836	5.00373e-09	4.51296e-07	3.92846	up	EF154513	chr14:53455536-53455785		T cell receptor alpha variable 7D-5 [Source:MGI Symbol;Acc:MGI:3649422] [ENSMUST00000103586]			Mm.213248		173.387	1274.15	7.3495	9.32347	175.411	173.365	171.385	1263.76	1276.09	1282.58	7.35003	7.36676	7.33171	9.32852	9.32428	9.31759
A_51_P256827	5.02985e-09	4.51296e-07	2.87357	up	NM_013650	chr3:90473778-90473837	S100a8	Mus musculus S100 calcium binding protein A8 (calgranulin A) (S100a8), mRNA [NM_013650]	GO:0016209|GO:0005886|GO:0002523|GO:0006919|GO:0030593|GO:0005509|GO:0006914|GO:0006915|GO:2001244|GO:0005576|GO:0005615|GO:0046872|GO:0005737|GO:0006954|GO:0006935|GO:0016020|GO:0045087|GO:0050729|GO:0070488|GO:0005856	NM_013650	Mm.21567	20201	2072.53	11520.1	11.2344	12.7573	2079.87	2056.65	2081.08	11425.3	11537	11598	11.2197	11.2395	11.2442	12.7508	12.7613	12.7598
A_55_P1998461	5.21498e-09	4.55587e-07	2.93625	up	NM_001002239	chr18:75162976-75163035	Rpl17	Mus musculus ribosomal protein L17 (Rpl17), mRNA [NM_001002239]	GO:0005622|GO:0003674|GO:0003735|GO:0030529|GO:0015934|GO:0005840|GO:0022625|GO:0006412	NM_001002239	Mm.276337	319195	877.593	5084.8	9.89699	11.451	889.621	859.938	883.22	5021.87	5073.65	5158.88	9.8965	9.88554	9.90891	11.4459	11.4459	11.4611
A_55_P2111790	5.22045e-09	4.55587e-07	4.18985	up	NM_010276	chr4:11641692-11641751	Gem	Mus musculus GTP binding protein (gene overexpressed in skeletal muscle) (Gem), mRNA [NM_010276]	GO:0005515|GO:0072686|GO:0051276|GO:0000287|GO:0005886|GO:0007264|GO:0003924|GO:0030496|GO:0005634|GO:0051233|GO:0005525|GO:0006184|GO:0007165|GO:0007067|GO:0000166|GO:0016020|GO:0009898|GO:0019003	NM_010276	Mm.247486	14579	904.331	7227.18	9.94871	12.0156	922.453	894.814	895.725	7122.45	7232.58	7326.51	9.95353	9.96116	9.93144	12.0025	12.019	12.0254
A_51_P217463	5.74573e-09	4.68531e-07	7.76037	up	NM_009140	chr5:91334534-91334593	Cxcl2	Mus musculus chemokine (C-X-C motif) ligand 2 (Cxcl2), mRNA [NM_009140]	GO:0008009|GO:0006955|GO:0006954|GO:0006935|GO:0030595|GO:0070997|GO:0030593|GO:0002237|GO:0005576|GO:0007204|GO:0005615|GO:0005125	NM_009140	Mm.4979	20310	113.816	1554.92	6.6786	9.63472	117.131	111.641	112.676	1526.17	1570.04	1568.55	6.70549	6.65601	6.67429	9.62244	9.64935	9.63239
A_51_P203955	5.76975e-09	4.68531e-07	8.08931	up	NM_010260	chr3:142300719-142300778	Gbp2	Mus musculus guanylate binding protein 2 (Gbp2), mRNA [NM_010260]	GO:0005794|GO:0035458|GO:0050830|GO:0020005|GO:0003924|GO:0042832|GO:0005634|GO:0051856|GO:0031410|GO:0005525|GO:0006184|GO:0005737|GO:0071222|GO:0071346|GO:0000166|GO:0016020	NM_010260	Mm.24038	14469	3627.87	43201.7	12.0677	15.0837	3671.57	3561.34	3650.71	43855.6	43324.1	42425.4	12.0621	12.0616	12.0794	15.077	15.1137	15.0604
A_66_P122729	5.82399e-09	4.69943e-07	2.70641	up	NM_025594	chr18:36957668-36957727	Zmat2	Mus musculus zinc finger, matrin type 2 (Zmat2), mRNA [NM_025594]	GO:0008150|GO:0008270|GO:0005634|GO:0005575|GO:0003676|GO:0003677|GO:0046872	NM_025594	Mm.251155	66492	1142.85	6145.33	10.3102	11.7466	1170.27	1127.95	1130.33	6084.52	6160.37	6191.08	10.3205	10.3149	10.2953	11.7437	11.7514	11.7447
A_52_P608322	5.83183e-09	4.69943e-07	17.9906	up	NM_010755	chr15:79189442-79189501	Maff	Mus musculus v-maf musculoaponeurotic fibrosarcoma oncogene family, protein F (avian) (Maff), mRNA [NM_010755]	GO:0043565|GO:0006355|GO:0003700|GO:0005634|GO:0045604|GO:0035914|GO:0003677|GO:0001701|GO:0006351	NM_010755	Mm.86646	17133	301.134	8951.91	8.19414	12.3633	311.919	289.454	302.03	8951.94	8900.45	9003.33	8.22936	8.15182	8.20125	12.3735	12.3556	12.3608
A_52_P186262	5.92128e-09	4.74625e-07	2.1188	up	AF163743	chr6:70165770-70165829		Mus musculus mAb 24.1.2 immunoglobulin light chain variable region mRNA, partial cds. [AF163743]			Mm.423820		457.339	1930.3	8.86213	9.94537	466.199	447.423	458.395	1900.13	1931.34	1959.44	8.86552	8.85419	8.86667	9.93732	9.94559	9.9532
A_52_P482897	5.93574e-09	4.74625e-07	6.65185	up	NM_009704	chr5:91570090-91570149	Areg	Mus musculus amphiregulin (Areg), mRNA [NM_009704]	GO:0005154|GO:0008284|GO:0060744|GO:0009986|GO:0060750|GO:0051384|GO:0005634|GO:0060598|GO:0005125|GO:0005615|GO:0031175|GO:0014009|GO:0005622|GO:0005737|GO:0045668|GO:0007173|GO:0016020|GO:0016021|GO:0032355|GO:0008083|GO:0060749|GO:0042327	NM_009704	Mm.8039	11839	5	65.4203	2.37858	5.11233	5	5	5	65.7632	65.0964	65.4012	2.37763	2.37576	2.38233	5.14253	5.10041	5.09406
A_55_P2120807	6.20017e-09	4.84766e-07	2.145	up	NM_007861	chr12:32018350-32018291	Dld	Mus musculus dihydrolipoamide dehydrogenase (Dld), mRNA [NM_007861]	GO:0051068|GO:0016668|GO:0007369|GO:0043159|GO:0050660|GO:0005634|GO:0006086|GO:0005739|GO:0005929|GO:0051287|GO:0043544|GO:0006103|GO:0042391|GO:0006120|GO:0006508|GO:0009106|GO:0016491|GO:0045454|GO:0045252|GO:0048240|GO:0004148|GO:0045254|GO:0055114	NM_007861	Mm.3131	13382	866.12	3745.61	9.8759	10.9769	885.136	852.965	860.258	3719.44	3743.98	3773.4	9.88644	9.87203	9.86923	10.9832	10.9725	10.9749
A_66_P100840	6.35112e-09	4.86016e-07	3.13886	up		chr14:012012278-012012337							683.943	4104.7	9.48518	11.1354	701.152	674.434	676.243	4043.53	4108.9	4161.68	9.49617	9.49069	9.46867	11.1286	11.1345	11.1432
A_51_P385099	6.37758e-09	4.86016e-07	23.5032	up	NM_013693	chr17:35336854-35336795	Tnf	Mus musculus tumor necrosis factor (Tnf), transcript variant 1, mRNA [NM_013693]	GO:0032755|GO:0005515|GO:0019722|GO:0032715|GO:0001819|GO:0002020|GO:0005615|GO:0005622|GO:0031622|GO:0030730|GO:0030198|GO:0000165|GO:0042127|GO:0034116|GO:0009887|GO:0031663|GO:0000060|GO:0032729|GO:0005164|GO:0002876|GO:0009986|GO:0008652|GO:0001891|GO:0006952|GO:0007275|GO:0032722|GO:0000122|GO:0005125|GO:0033209|GO:0005887|GO:0009897|GO:0008625|GO:0002439|GO:0008284|GO:0008285|GO:0005886|GO:…	NM_013693	Mm.1293	21926	44.5817	1601.7	5.12444	9.67923	45.037	46.1489	42.5591	1579.11	1606.37	1619.62	5.12774	5.16769	5.0779	9.67868	9.68181	9.67719
A_52_P257502	6.40103e-09	4.86016e-07	6.85988	up	NM_010517	chr11:98913334-98913393	Igfbp4	Mus musculus insulin-like growth factor binding protein 4 (Igfbp4), mRNA [NM_010517]	GO:0044342|GO:0019838|GO:0043568|GO:0005576|GO:0043410|GO:0005615|GO:0001558|GO:0040008|GO:0010906|GO:0005520	NM_010517	Mm.233799	16010	291.448	3611.86	8.14254	10.9207	298.532	289.995	285.815	3557.86	3640.42	3637.31	8.15738	8.15629	8.11395	10.9103	10.9338	10.918
A_52_P83959	6.47992e-09	4.88609e-07	5.62718	up	NM_175770	chr18:37802400-37802341	Taf7	Mus musculus TAF7 RNA polymerase II, TATA box binding protein (TBP)-associated factor (Taf7), transcript variant 1, mRNA [NM_175770]	GO:0005515|GO:0003700|GO:0006367|GO:0006366|GO:0044212|GO:0005634|GO:0035067|GO:0046966|GO:0005737|GO:0042809|GO:0071339|GO:0045944|GO:0035035|GO:0006352|GO:0006355|GO:0008024|GO:0005794|GO:0005669|GO:0006357|GO:0003713|GO:0000122|GO:0006351|GO:0033276|GO:0006469|GO:0045892|GO:0008134|GO:0030520	NM_175770	Mm.236009	24074	461.499	4779.18	8.87546	11.3679	467.288	460.858	456.351	4767.64	4746.19	4823.7	8.86942	8.90106	8.85591	11.375	11.3582	11.3704
A_55_P1977875	6.48165e-09	4.88609e-07	3.59326	up	NM_176849	chr8:8683865-8683806	Arglu1	Mus musculus arginine and glutamate rich 1 (Arglu1), mRNA [NM_176849]	GO:0008150|GO:0003674|GO:0005575	NM_176849	Mm.251655	234023	138.412	927.462	6.99535	8.84064	138.452	138.419	138.366	926.252	925.636	930.499	6.97974	7.00598	7.00031	8.85419	8.8366	8.83113
A_52_P162957	6.62107e-09	4.89794e-07	3.3964	up	NM_177603	chr19:41920767-41920708	Frat2	Mus musculus frequently rearranged in advanced T cell lymphomas 2 (Frat2), mRNA [NM_177603]	GO:0003674|GO:0005575|GO:0016055	NM_177603	Mm.222723	212398	828.55	5464.49	9.7948	11.5588	837.149	821.985	826.515	5473.09	5445.74	5474.64	9.78533	9.80777	9.79131	11.5738	11.554	11.5487
A_51_P176972	6.6568e-09	4.89794e-07	5.67236	up	NM_178114	chr15:97075321-97075262	Amigo2	Mus musculus adhesion molecule with Ig like domain 2 (Amigo2), transcript variant 1, mRNA [NM_178114]	GO:0043069|GO:0003674|GO:0043066|GO:0016020|GO:0005886|GO:0005634|GO:0016021|GO:0007155|GO:0007156|GO:0007157	NM_178114	Mm.24005	105827	162.272	1679.89	7.23965	9.7436	161.769	161.389	163.658	1659.04	1672.11	1708.54	7.21277	7.24716	7.25902	9.74243	9.73722	9.75115
A_55_P2125907	6.91821e-09	4.966e-07	8.284	up	XM_003688990	chrY_random:008005432-008005373	Gm21064	PREDICTED: Mus musculus uncharacterized LOC100861598, transcript variant 1 (LOC100861598), mRNA [XM_003688990]		XM_003688990	Mm.436648	100861598	9.81244	114.223	2.8602	5.91053	9.93343	10.285	9.21889	112.766	111.914	117.99	2.8615	2.85459	2.86452	5.91643	5.87765	5.93752
A_51_P189746	6.94521e-09	4.96843e-07	3.10856	up	NM_145478	chr15:88695626-88695685	Pim3	Mus musculus proviral integration site 3 (Pim3), mRNA [NM_145478]	GO:0005515|GO:0043066|GO:0016572|GO:0006915|GO:0005524|GO:0007346|GO:0016310|GO:0005737|GO:0007049|GO:0046777|GO:0004672|GO:0000166|GO:0004674|GO:0016301|GO:0006468|GO:0061179|GO:0016740|GO:0016772	NM_145478	Mm.400129	223775	224.252	1321.77	7.74393	9.38018	228.028	222.1	222.627	1301.5	1312.83	1350.99	7.74821	7.75002	7.73358	9.3759	9.36897	9.39567
A_55_P2083014	7.17805e-09	5.06137e-07	19.7826	up	FM179715	chr6:041221821-041221880		Mus musculus partial mRNA for T cell receptor beta chain (TRB gene), isolate 80_TCT. [FM179715]			Mm.424226		52.9297	1642.44	5.40775	9.7139	54.8531	52.4836	51.4523	1654.34	1637.55	1635.42	5.4506	5.38939	5.38324	9.73841	9.71097	9.69233
A_52_P382676	7.34768e-09	5.15122e-07	15.2148	up	M59922	chr12:115673444-115673285	Ighv6-6	Mouse Ig heavy chain mRNA V-D-J region, 5' end. [M59922]			Mm.431322	238427	81.5091	2095.25	6.13749	10.0649	81.0117	82.986	80.5295	2077.59	2117.4	2090.75	6.10636	6.1775	6.12861	10.0698	10.0791	10.0458
A_52_P1142105	7.55762e-09	5.22029e-07	11.7676	up	X96776	chr6:70468264-70468323		M.musculus mRNA for C2-Fcgamma fusion protein. [X96776]			Mm.425752		23.3049	406.932	4.08798	7.64473	23.3899	23.6663	22.8586	411.516	405.449	403.83	4.08947	4.07199	4.10247	7.68107	7.63762	7.61549
A_55_P2078281	7.58257e-09	5.22029e-07	3.90473	up	AJ007295	chr6:40997921-40997980		Mus musculus mRNA for T cell receptor BV4, haplotype a. [AJ007295]			Mm.333012		269.223	1989.7	8.02119	9.98641	274.511	262.488	270.668	1988.44	1976.41	2004.25	8.02774	8.00455	8.03128	10.0021	9.97451	9.98261
A_51_P254855	7.80994e-09	5.23915e-07	4.3058	up	NM_011198	chr1:151954744-151954803	Ptgs2	Mus musculus prostaglandin-endoperoxide synthase 2 (Ptgs2), mRNA [NM_011198]	GO:0006693|GO:0035633|GO:0042640|GO:0051213|GO:0042803|GO:0071636|GO:0043231|GO:0031622|GO:0004601|GO:0001516|GO:0042127|GO:0032496|GO:0090050|GO:0051926|GO:0007613|GO:0090362|GO:0007612|GO:0010942|GO:0006979|GO:0007566|GO:0051968|GO:0045786|GO:0043234|GO:0050873|GO:0032227|GO:0016491|GO:0019899|GO:0055114|GO:0020037|GO:0006629|GO:0042346|GO:0043005|GO:0008284|GO:0008285|GO:0005783|GO:0005634|GO:…	NM_011198	Mm.292547	19225	74.1221	552.846	5.97185	8.07813	74.8649	73.0262	74.4751	540.586	559.856	558.096	5.96818	5.95626	5.9911	8.06461	8.09034	8.07944
A_55_P2212027	7.82185e-09	5.23915e-07	2.00365	up	NM_011682	chr10:12221287-12221228	Utrn	Mus musculus utrophin (Utrn), mRNA [NM_011682]	GO:0005515|GO:0031594|GO:0005886|GO:0019901|GO:0045202|GO:0003779|GO:0005634|GO:0030175|GO:0030426|GO:0043234|GO:0005737|GO:0051015|GO:0005178|GO:0016010|GO:0007528|GO:0007527|GO:0017166|GO:0030864|GO:0070938|GO:0001954	NM_011682	Mm.331784	22288	705.376	2818.39	9.53806	10.5407	715.231	698.235	702.662	2785.83	2819.35	2849.99	9.53445	9.5495	9.53023	10.5378	10.5417	10.5425
A_52_P126146	7.99278e-09	5.27136e-07	4.82207	up	NM_024242	chr13:38148091-38149059	Riok1	Mus musculus RIO kinase 1 (yeast) (Riok1), mRNA [NM_024242]	GO:0016310|GO:0000166|GO:0016301|GO:0004674|GO:0005575|GO:0003824|GO:0005524|GO:0016740|GO:0016772	NM_024242	Mm.297130	71340	538.643	4855.88	9.11893	11.3886	537.699	533.378	544.853	4814.57	4856.62	4896.44	9.09301	9.12417	9.13961	11.3893	11.3887	11.3878
A_52_P1391	8.07539e-09	5.29102e-07	3.91898	up	NM_010388	chr17:34284764-34284823	H2-DMb2	Mus musculus histocompatibility 2, class II, locus Mb2 (H2-DMb2), mRNA [NM_010388]	GO:0005515|GO:0005770|GO:0002504|GO:0005771|GO:0042613|GO:0005765|GO:0005764|GO:0019886|GO:0016020|GO:0019882|GO:0051085|GO:0016021|GO:0010008	NM_010388	Mm.195060	15000	1261.21	9334.54	10.4573	12.4278	1288.38	1223.63	1271.6	9246.94	9344.68	9412	10.4618	10.4362	10.4739	12.4195	12.4299	12.434
A_66_P118004	8.33573e-09	5.33895e-07	3.00514	up	NM_001003950	chr10:116343891-116343832	Rab3ip	Mus musculus RAB3A interacting protein (Rab3ip), mRNA [NM_001003950]	GO:0017112|GO:0005813|GO:0033365|GO:0005634|GO:0042995|GO:0015031|GO:0005829|GO:0005085|GO:0042384|GO:0005737|GO:0050790|GO:0051020|GO:0006810|GO:0005856	NM_001003950	Mm.336394	216363	2952.13	16726.4	11.7622	13.3497	3013.02	2932.93	2910.46	16692.5	16619.5	16867.3	11.7671	11.7743	11.7453	13.3526	13.3413	13.3551
A_52_P431615	8.37084e-09	5.33895e-07	2.48628	up	NM_001277183	chr7:113740799-113740740	Gm1966	Mus musculus predicted gene 1966 (Gm1966), transcript variant 5, mRNA [NM_001277183]	GO:0008150|GO:0003674|GO:0005575	NM_001277183	Mm.334112	434223	2668.52	12938	11.6107	12.9247	2708.64	2634.15	2662.77	12727.9	13012	13074	11.611	11.609	11.6123	12.9088	12.9334	12.932
A_55_P2129068	9.00476e-09	5.58667e-07	3.38959	up	NM_001115130	chr9:30871768-30871827	Zbtb44	Mus musculus zinc finger and BTB domain containing 44 (Zbtb44), transcript variant a, mRNA [NM_001115130]	GO:0008150|GO:0006355|GO:0005634|GO:0003676|GO:0003677|GO:0046872|GO:0006351	NM_001115130	Mm.239355	235132	141.724	897.88	7.03197	8.79308	141.72	141.408	142.045	891.477	890.519	911.642	7.01629	7.03965	7.03997	8.80118	8.77777	8.8003
A_66_P100165	9.25913e-09	5.6191e-07	3.43941	up	NM_009250	chr3:75420571-75420630	Serpini1	Mus musculus serine (or cysteine) peptidase inhibitor, clade I, member 1 (Serpini1), mRNA [NM_009250]	GO:0030162|GO:0010951|GO:0004867|GO:0010466|GO:0005576|GO:0030414|GO:0030155|GO:0005615	NM_009250	Mm.41560	20713	156.463	1005.91	7.18091	8.96307	158.851	153.671	156.867	997.739	1015.05	1004.94	7.18495	7.1675	7.19027	8.97115	8.97258	8.94548
A_55_P2360427	9.35006e-09	5.64496e-07	3.18712	up	NM_001166581	chr5:104949957-104950016	BC005561	Mus musculus cDNA sequence BC005561 (BC005561), mRNA [NM_001166581]	GO:0008150|GO:0003674|GO:0005575	NM_001166581	Mm.482189	100042165	220.133	1330.12	7.71526	9.38751	226.044	216.513	217.841	1318.59	1326.11	1345.67	7.73463	7.71121	7.69994	9.38973	9.38263	9.39018
A_51_P125050	1.02256e-08	5.93392e-07	2.24213	up	NM_134139	chr19:8812462-8812679	Wdr74	Mus musculus WD repeat domain 74 (Wdr74), mRNA [NM_134139]	GO:0003674|GO:0016070|GO:0005730|GO:0001825|GO:0005634	NM_134139	Mm.29627	107071	225.985	977.053	7.75578	8.92065	228.667	223.937	225.352	973.518	974.416	983.226	7.75244	7.76357	7.75133	8.93341	8.91445	8.91408
A_55_P2107542	1.02636e-08	5.93392e-07	10.192	up	AK051102	chr4:102275988-102276046	Pde4b	Mus musculus 9 days embryo whole body cDNA, RIKEN full-length enriched library, clone:D030072C22 product:phosphodiesterase 4B, cAMP specific, full insert sequence. [AK051102]	GO:0001780|GO:0050852|GO:0030018|GO:0048471|GO:0005634|GO:0050900|GO:0046872|GO:0005829|GO:0071944|GO:0006939|GO:0005737|GO:0030552|GO:0086004|GO:0006198|GO:0032729|GO:0004115|GO:0004114|GO:0032743|GO:0030593|GO:0005891|GO:0035690|GO:0044325|GO:0071222|GO:0016787|GO:0071872		Mm.406096	18578	308.577	5531.28	8.23198	11.5813	314.267	311.316	300.149	5504.41	5503.75	5585.66	8.24046	8.26387	8.1916	11.5858	11.5749	11.5833
A_52_P162509	1.03098e-08	5.93392e-07	2.35318	up	NM_021414	chr6:29856683-29856742	Ahcyl2	Mus musculus S-adenosylhomocysteine hydrolase-like 2 (Ahcyl2), transcript variant 1, mRNA [NM_021414]	GO:0004013|GO:0016787|GO:0005575|GO:0006730	NM_021414	Mm.210899	74340	82.8521	340.017	6.16407	7.39867	83.5018	82.7797	82.2747	335.681	339.226	345.144	6.15132	6.17113	6.16974	7.40003	7.38988	7.40611
A_55_P1953241	1.05455e-08	5.9944e-07	2.48993	up	NM_010757	chr5:140278221-140278280	Mafk	Mus musculus v-maf musculoaponeurotic fibrosarcoma oncogene family, protein K (avian) (Mafk), mRNA [NM_010757]	GO:0043565|GO:0005515|GO:0006355|GO:0003700|GO:0005634|GO:0003677|GO:0006351|GO:0007399	NM_010757	Mm.157313	17135	1015.68	5040.64	10.123	11.4391	1039.49	1003.19	1004.35	4961.76	5069.73	5090.43	10.1335	10.1266	10.1089	11.4307	11.4454	11.4411
A_55_P2107288	1.07286e-08	6.02246e-07	4.09551	up	NM_009371	chr9:115999555-115999496	Tgfbr2	Mus musculus transforming growth factor, beta receptor II (Tgfbr2), transcript variant 1, mRNA [NM_009371]	GO:0005515|GO:0060044|GO:0051216|GO:0046332|GO:0048701|GO:0002663|GO:0030154|GO:0007224|GO:0007507|GO:0000166|GO:0004702|GO:0018105|GO:0016301|GO:0042127|GO:0018107|GO:0007178|GO:0009887|GO:0007179|GO:0016772|GO:0009986|GO:0031435|GO:0001701|GO:0006898|GO:0043235|GO:0002666|GO:0007182|GO:0016310|GO:0005887|GO:0007420|GO:0045121|GO:0060389|GO:0040008|GO:0009897|GO:0007369|GO:0008285|GO:0005886|GO:…	NM_009371	Mm.172346	21813	82.3365	594.382	6.1506	8.18465	84.6961	81.5084	80.805	584.783	596.611	601.752	6.17589	6.14082	6.1351	8.17766	8.18888	8.1874
A_55_P1970424	1.07294e-08	6.02246e-07	4.34647	up	NM_172727	chr6:49339004-49339063	Fam221a	Mus musculus family with sequence similarity 221, member A (Fam221a), transcript variant 1, mRNA [NM_172727]	GO:0008150|GO:0003674|GO:0005575	NM_172727	Mm.35199	231946	24.6165	152.449	4.17573	6.29557	24.7699	25.0223	24.0573	150.864	154.738	151.745	4.1807	4.16293	4.18356	6.30563	6.30977	6.27132
A_55_P1966608	1.11521e-08	6.07238e-07	2.8261	up		chr12:117247905-117247846							416.471	2304.97	8.71287	10.2117	420.002	410.033	419.38	2269.02	2326.84	2319.06	8.7043	8.70756	8.72673	10.2036	10.2255	10.206
A_55_P1962675	1.11855e-08	6.07238e-07	3.46895	up	NM_001033430	chr6:39088714-39088655	Jhdm1d	Mus musculus jumonji C domain-containing histone demethylase 1 homolog D (S. cerevisiae) (Jhdm1d), mRNA [NM_001033430]	GO:0032454|GO:0006355|GO:0035574|GO:0035575|GO:0005506|GO:0051213|GO:0005634|GO:0035064|GO:0051864|GO:0046872|GO:0006351|GO:0007399|GO:0070544|GO:0071557|GO:0016491|GO:0016706|GO:0008270|GO:0045893|GO:0071558|GO:0055114|GO:0016568|GO:0033169	NM_001033430	Mm.293175	338523	92.4432	571.477	6.33422	8.12872	94.6374	91.8088	90.8834	566.144	573.739	574.548	6.35183	6.33742	6.31341	8.13318	8.13154	8.12143
A_55_P2092526	1.11963e-08	6.07238e-07	3.24387	up	NM_001164075	chr17:71193688-71193629	Tgif1	Mus musculus TGFB-induced factor homeobox 1 (Tgif1), transcript variant 1, mRNA [NM_001164075]	GO:0005515|GO:0006355|GO:0007368|GO:0003700|GO:0008285|GO:0060041|GO:0070410|GO:0001843|GO:0005634|GO:0048146|GO:0000122|GO:0009953|GO:0003677|GO:0006351|GO:0043565|GO:0048387|GO:0045666|GO:0003682|GO:0010629|GO:0010470|GO:0038092|GO:0008432	NM_001164075	Mm.101034	21815	3732.68	22073.2	12.1134	13.8112	3811.46	3642.82	3743.77	22076.6	22105.1	22037.9	12.1245	12.0948	12.1211	13.8037	13.8231	13.8067
A_55_P2120812	1.16085e-08	6.21866e-07	6.00561	up		chr3:95264558-95264617	Arnt	aryl hydrocarbon receptor nuclear translocator [Source:MGI Symbol;Acc:MGI:88071] [ENSMUST00000107160]	GO:0005515|GO:0003700|GO:0003705|GO:0005634|GO:0000989|GO:0030154|GO:0005737|GO:0046886|GO:0045944|GO:0046983|GO:0004874|GO:0033235|GO:0004871|GO:2001141|GO:0005667|GO:0001666|GO:0006355|GO:0046982|GO:0003713|GO:0001892|GO:0009636|GO:0043619|GO:0003677|GO:0010575|GO:0006351|GO:0043565|GO:0007165|GO:0017162|GO:0045893|GO:0030522|GO:0008134			11863	11.932	94.5439	3.0605	5.64681	12.1959	12.1133	11.4868	92.746	94.3394	96.5462	3.07556	3.02922	3.07673	5.64238	5.63746	5.6606
A_52_P398989	1.16201e-08	6.21866e-07	3.69826	up	NM_139200	chr2:57985483-57985424	Cytip	Mus musculus cytohesin 1 interacting protein (Cytip), mRNA [NM_139200]	GO:0005737|GO:0030155|GO:0005938|GO:0005768	NM_139200	Mm.273905	227929	16344	72898.6	14.3021	16.1889	16604.8	16123.7	16303.5	75221.2	71437.2	72037.4	14.2904	14.3155	14.3004	16.2011	16.1687	16.197
A_55_P2010152	1.20662e-08	6.33501e-07	3.26818	up	NM_001164059	chr1:166010740-166010799	Sell	Mus musculus selectin, lymphocyte (Sell), transcript variant 2, mRNA [NM_001164059]	GO:0005515|GO:0051861|GO:0005886|GO:0009986|GO:0042981|GO:0002020|GO:0016020|GO:0090023|GO:0030246|GO:0033198|GO:0016021|GO:0007155|GO:0050839|GO:0009897	NM_001164059	Mm.1461	20343	20091.2	81523.2	14.688	16.3965	20561.9	19572.7	20139	83066.3	80456.4	81046.8	14.687	14.6782	14.6987	16.3778	16.4008	16.4108
A_66_P116804	1.21623e-08	6.33501e-07	2.24303	up	NM_028887	chr17:71805028-71804969	Smchd1	Mus musculus SMC hinge domain containing 1 (Smchd1), mRNA [NM_028887]	GO:0001740|GO:0051276|GO:0005694|GO:0060821|GO:0009048|GO:0005524	NM_028887	Mm.194450	74355	1005.43	4482.7	10.1085	11.274	1025	979.475	1011.81	4435.95	4477.07	4535.09	10.1123	10.0952	10.1182	11.2709	11.2697	11.2814
A_66_P112006	1.22061e-08	6.33501e-07	2.74229	up	NM_010395	chr17:36255977-36255918	H2-T10	Mus musculus histocompatibility 2, T region locus 10 (H2-T10), mRNA [NM_010395]	GO:0002474|GO:0048839|GO:0005886|GO:0042605|GO:0005102	NM_010395	Mm.426031	15024	2373.69	12700.8	11.4413	12.8967	2441.19	2313.36	2366.52	12653.9	12691.3	12757.2	11.4582	11.4253	11.4405	12.895	12.9011	12.8941
A_55_P2181162	1.22353e-08	6.33501e-07	2.7399	up		chr4:147943682-147943623							16437.5	59554.7	14.3079	15.762	16962.7	16001.7	16348.1	61574.5	58894.1	58195.5	14.3195	14.3004	14.3038	15.7736	15.7652	15.7472
A_55_P2003488	1.23836e-08	6.37542e-07	3.82431	up	X93075	chr6:41009810-41009869		M.musculus mRNA for partial T cell receptor (hybridoma HM2.1; 180 bp). [X93075]			Mm.389744		414.45	3009.12	8.70571	10.6409	422.053	403.024	418.274	2976.48	3027.64	3023.23	8.71263	8.68235	8.72215	10.6404	10.65	10.6323
A_55_P2401971	1.24571e-08	6.38876e-07	4.02604	up	AK036290	chr9:14090608-14090667	AU015680	Mus musculus 16 days neonate cerebellum cDNA, RIKEN full-length enriched library, clone:9630054C12 product:unclassifiable, full insert sequence. [AK036290]			Mm.227443	552875	909.851	7012.65	9.95913	11.9685	921.475	899.534	908.543	6842.36	7069.39	7126.21	9.95157	9.96834	9.95748	11.9432	11.9801	11.9821
A_55_P2059117	1.25904e-08	6.41163e-07	4.4737	up	AK041917	chr11:96442650-96442709	Skap1	Mus musculus 3 days neonate thymus cDNA, RIKEN full-length enriched library, clone:A630046L14 product:hypothetical protein, full insert sequence. [AK041917]	GO:0050852|GO:0005737|GO:0019901|GO:0016020|GO:0005886|GO:0045944|GO:0019904|GO:0005634|GO:0045893|GO:0042169|GO:0032403|GO:0003823		Mm.395840	78473	41.2828	288.637	5.00723	7.1687	40.8224	42.4052	40.6206	285.542	289.034	291.335	4.98169	5.03186	5.00813	7.17261	7.1675	7.16598
A_55_P1972118	1.28738e-08	6.474e-07	2.71584	up		chr9:096714388-096714329							26585.7	89291.2	15.1655	16.6069	27421.3	26010.2	26325.7	92423.4	88224.5	87225.7	15.1792	15.1658	15.1516	16.5998	16.6182	16.6027
A_51_P117903	1.30645e-08	6.474e-07	2.45195	up	BC092269	chr12:115170336-115170278	Ighg	Mus musculus Immunoglobulin heavy chain (gamma polypeptide), mRNA (cDNA clone MGC:102659 IMAGE:4015795), complete cds. [BC092269]	GO:0008150|GO:0003674|GO:0016020|GO:0016021|GO:0005575|GO:0003823		Mm.342177	380794	109.632	491.159	6.61538	7.9093	110.486	109.399	109.011	486.365	488.934	498.179	6.60315	6.6189	6.62408	7.91502	7.8969	7.91599
A_66_P115378	1.31072e-08	6.474e-07	2.57098	up	NM_008765	chr1:58522890-58521127	Orc2	Mus musculus origin recognition complex, subunit 2 (Orc2), transcript variant a, mRNA [NM_008765]	GO:0006260|GO:0000792|GO:0000808|GO:0005634|GO:0005664|GO:0003688|GO:0000785|GO:0000939	NM_008765	Mm.3411	18393	266.077	1309.33	8.0045	9.36681	272.116	263.236	262.877	1296.36	1315.35	1316.29	8.01697	8.00816	7.98836	9.36936	9.37192	9.35916
A_51_P324228	1.3206e-08	6.474e-07	3.58127	up	NM_009122	chr17:51879196-51879137	Satb1	Mus musculus special AT-rich sequence binding protein 1 (Satb1), transcript variant 2, mRNA [NM_009122]	GO:0006355|GO:0003700|GO:0016571|GO:0006325|GO:0043367|GO:0005634|GO:0000122|GO:0003677|GO:0006351|GO:0016363|GO:0043565|GO:0042110|GO:0005720|GO:0043374|GO:0008544|GO:0060004|GO:0016605|GO:0003682|GO:0050798|GO:0006338|GO:0000785|GO:0016568	NM_009122	Mm.311655	20230	9060.85	46974.5	13.3976	15.2381	9152.13	9067.31	8963.11	47997.2	46543.5	46382.9	13.3842	13.4214	13.3873	15.2457	15.2373	15.2314
A_55_P2019714	1.32197e-08	6.474e-07	4.33987	up	NM_147155	chr17:7159381-7159322	Tagap1	Mus musculus T cell activation GTPase activating protein 1 (Tagap1), mRNA [NM_147155]	GO:0008150|GO:0003674|GO:0005575	NM_147155	Mm.371734	380608	454.708	3729.98	8.8535	10.9711	459.416	451.093	453.616	3744.24	3707.32	3738.38	8.84316	8.87141	8.84592	10.9939	10.9591	10.9604
A_51_P290576	1.32395e-08	6.474e-07	7.96487	up	NM_152804	chr13:111190915-111190974	Plk2	Mus musculus polo-like kinase 2 (Plk2), mRNA [NM_152804]	GO:0007093|GO:0032436|GO:0060291|GO:0007265|GO:0060292|GO:0042995|GO:0046599|GO:0032403|GO:0030425|GO:0032092|GO:0005622|GO:0005737|GO:0000082|GO:0000166|GO:0048167|GO:0016301|GO:0007613|GO:0061000|GO:0004871|GO:0043123|GO:0005856|GO:0007052|GO:0016772|GO:0043066|GO:0005813|GO:0032486|GO:0005814|GO:0005524|GO:0016310|GO:0004672|GO:0004674|GO:0006468|GO:0000278|GO:0016740	NM_152804	Mm.380	20620	283.701	3997.46	8.09689	11.0905	281.56	282.018	287.526	3958.69	3955.98	4077.7	8.06707	8.1004	8.1232	11.0933	11.0677	11.1106
A_52_P658122	1.36e-08	6.60588e-07	4.45991	up	NM_011809	chr16:95942227-95942286	Ets2	Mus musculus E26 avian leukemia oncogene 2, 3' domain (Ets2), mRNA [NM_011809]	GO:0043565|GO:0006355|GO:0003700|GO:0000977|GO:0005634|GO:0045893|GO:0003677|GO:0006351	NM_011809	Mm.290207	23872	784.047	6593.18	9.7081	11.8651	805.569	765.362	781.211	6562.73	6525.91	6690.88	9.72663	9.69196	9.70572	11.8697	11.8443	11.8814
A_55_P2286650	1.43525e-08	6.738e-07	3.66769	up	AK032850	chr4:148629322-148629263	6720462K09Rik	Mus musculus 12 days embryo male wolffian duct includes surrounding region cDNA, RIKEN full-length enriched library, clone:6720462K09 product:unclassifiable, full insert sequence. [AK032850]				399579	1616.83	11230.8	10.8406	12.7155	1652.83	1596.86	1600.81	11024.8	11348.9	11318.5	10.8494	10.8457	10.8268	12.695	12.7331	12.7184
A_66_P122621	1.46188e-08	6.84771e-07	8.22676	up	AK038322	chr3:115419560-115419619	Gm9889	Mus musculus 16 days neonate thymus cDNA, RIKEN full-length enriched library, clone:A130095K04 product:hypothetical Proline-rich region containing protein, full insert sequence. [AK038322]			Mm.370758	791369	195.183	2876.68	7.53266	10.573	196.589	192.467	196.494	2859.63	2935.73	2834.66	7.51956	7.53326	7.54516	10.5825	10.602	10.5345
A_52_P541833	1.48006e-08	6.88686e-07	3.3305	up	NM_177876	chr5:124454877-124454818	Vps37b	Mus musculus vacuolar protein sorting 37B (yeast) (Vps37b), mRNA [NM_177876]	GO:0003674|GO:0000813|GO:0016020|GO:0006810|GO:0030496|GO:0015031|GO:0005768	NM_177876	Mm.4079	330192	5940.87	32192.7	12.7686	14.5044	6055.91	5826.32	5940.39	31972.1	32092.6	32513.4	12.7711	12.7637	12.7711	14.4822	14.5077	14.5233
A_55_P2150697	1.49802e-08	6.92155e-07	2.8322	up	NM_028719	chr9:104935202-104935261	Cpne4	Mus musculus copine IV (Cpne4), mRNA [NM_028719]	GO:0005515|GO:0008150|GO:0005575	NM_028719	Mm.326240	74020	348.26	1917.38	8.43101	9.93293	357.124	344	343.656	1897.17	1925.04	1929.93	8.44552	8.43545	8.41207	9.93493	9.93831	9.92555
A_55_P2018825	1.57578e-08	7.02927e-07	2.58462	up	BC172047	chr13:74905526-74905467		Mus musculus heterogeneous nuclear ribonucleoprotein A1-like 2, mRNA (cDNA clone MGC:198752 IMAGE:9054333), complete cds. [BC172047]			Mm.450068		317.913	1567.81	8.27711	9.64706	324.874	311.396	317.467	1537.58	1569.68	1596.16	8.28768	8.26472	8.27891	9.63396	9.64854	9.65868
A_55_P2063594	1.60563e-08	7.10761e-07	2.30226	up	NR_002889	chr4:155331600-155331655	Gm5801	Mus musculus predicted pseudogene 5801 (Gm5801), non-coding RNA [NR_002889]		NR_002889	Mm.266575	545056	811.394	3724.9	9.7641	10.9671	833.235	795.25	805.696	3687.35	3718.3	3769.06	9.78018	9.75558	9.75653	10.9682	10.9612	10.972
A_55_P1964078	1.60955e-08	7.10761e-07	2.8519	up		chr3:105894209-105894268							1983.36	10994.8	11.1664	12.6783	2014.96	1940.97	1994.13	10957.5	11076.4	10950.6	11.1689	11.1533	11.177	12.6814	12.6911	12.6625
A_55_P2024530	1.64925e-08	7.10854e-07	2.10906	up	NM_009174	chr3:58478967-58478908	Siah2	Mus musculus seven in absentia 2 (Siah2), mRNA [NM_009174]	GO:0005515|GO:2001237|GO:0043005|GO:0006511|GO:0043066|GO:0004842|GO:0016567|GO:0016874|GO:0006915|GO:0005634|GO:0007275|GO:0046872|GO:0005829|GO:0005737|GO:0007049|GO:0043025|GO:0031396|GO:0008270|GO:0044257|GO:0043154|GO:0090090|GO:0005769|GO:0031624	NM_009174	Mm.2847	20439	931.289	3963.51	9.99821	11.0748	945.182	923.306	925.378	3928.46	3994.86	3967.2	9.99756	10.0053	9.99177	11.0744	11.0867	11.0633
A_52_P239403	1.65042e-08	7.10854e-07	3.83955	up	NM_181517	chr7:117194867-117194926	Ipo7	Mus musculus importin 7 (Ipo7), mRNA [NM_181517]	GO:0005622|GO:0005515|GO:0042393|GO:0005737|GO:0005794|GO:0008536|GO:0006810|GO:0005623|GO:0005634|GO:0015031|GO:0006606|GO:0006886	NM_181517	Mm.222328	233726	155.385	1117.23	7.17479	9.11572	159.38	154.228	152.546	1119.84	1115.29	1116.54	7.18999	7.1778	7.15657	9.13471	9.11227	9.10019
A_52_P2947	1.65492e-08	7.10854e-07	2.04683	up	NM_001127346	chr13:108843074-108843015	Ndufaf2	Mus musculus NADH dehydrogenase (ubiquinone) 1 alpha subcomplex, assembly factor 2 (Ndufaf2), mRNA [NM_001127346]	GO:0005739|GO:0003674|GO:0061179	NM_001127346	Mm.276040	75597	311.013	1240.44	8.24382	9.27721	313.279	308.415	311.344	1219.91	1238.01	1263.41	8.23533	8.25081	8.24531	9.26995	9.27264	9.28904
A_55_P2165554	1.66492e-08	7.13168e-07	6.86117	up		chr9:3024224-3024283		predicted gene 10718 [Source:MGI Symbol;Acc:MGI:3642028] [ENSMUST00000099046]					212.961	2673.84	7.66795	10.4464	218.457	205.945	214.48	2606.52	2711.35	2703.66	7.68405	7.64381	7.67599	10.4167	10.4715	10.451
A_55_P2158990	1.66883e-08	7.1339e-07	4.54746	up	NM_010591	chr4:94716987-94716928	Jun	Mus musculus Jun oncogene (Jun), mRNA [NM_010591]	GO:0005515|GO:0000790|GO:0003700|GO:0044212|GO:0006366|GO:0003705|GO:0042803|GO:0043524|GO:0003690|GO:0043525|GO:0045657|GO:0017053|GO:0007179|GO:0007612|GO:0001102|GO:0046982|GO:0005719|GO:0009987|GO:0045740|GO:0003713|GO:0043923|GO:0043392|GO:0043922|GO:0001889|GO:0032321|GO:0007184|GO:0000980|GO:0045893|GO:0045892|GO:0008134|GO:0035026|GO:0008284|GO:0031103|GO:0051899|GO:0008285|GO:0035497|GO:…	NM_010591	Mm.275071	16476	655.572	5619.44	9.42045	11.6055	661.511	641.873	663.333	5513.87	5629.55	5714.9	9.40537	9.40975	9.44624	11.5895	11.6057	11.6213
A_55_P2115235	1.6779e-08	7.13409e-07	2.19384	up	NM_199195	chr9:84017787-84017846	Bckdhb	Mus musculus branched chain ketoacid dehydrogenase E1, beta polypeptide (Bckdhb), mRNA [NM_199195]	GO:0005739|GO:0003863|GO:0008152|GO:0016491|GO:0005743|GO:0005947|GO:0009083|GO:0009063|GO:0003824|GO:0032403|GO:0003826|GO:0055114	NM_199195	Mm.12819	12040	1070.19	4676.44	10.2043	11.3378	1086.75	1060.52	1063.29	4590.91	4728.72	4709.69	10.1996	10.2125	10.2009	11.3263	11.351	11.3361
A_66_P113749	1.71283e-08	7.1828e-07	2.36385	up	NM_013563	chrX:98460189-98460130	Il2rg	Mus musculus interleukin 2 receptor, gamma chain (Il2rg), mRNA [NM_013563]	GO:0010628|GO:0010468|GO:0033089|GO:0032831|GO:0004896|GO:0016020|GO:0009986|GO:0045579|GO:0019982|GO:0016021|GO:0019976|GO:0009897	NM_013563	Mm.2923	16186	2522.82	11573.2	11.5252	12.7663	2563.05	2478.53	2526.87	11428.7	11669.2	11621.9	11.5246	11.5191	11.5318	12.7523	12.781	12.7655
A_55_P2083604	1.73174e-08	7.19799e-07	4.39527	up	NM_177721	chr19:29884182-29884123	Ranbp6	Mus musculus RAN binding protein 6 (Ranbp6), mRNA [NM_177721]	GO:0008150|GO:0003674|GO:0005737|GO:0006810|GO:0005634|GO:0005575|GO:0015031	NM_177721	Mm.125503	240614	82.634	637.793	6.15484	8.2908	85.2913	81.4109	81.1999	628.947	640.807	643.624	6.18583	6.13916	6.13953	8.28821	8.29528	8.2889
A_52_P487686	1.74093e-08	7.20774e-07	2.23036	up	NM_001082546	chr16:36359584-36359525	BC100530	Mus musculus cDNA sequence BC100530 (BC100530), mRNA [NM_001082546]	GO:0008150|GO:0003674|GO:0005575	NM_001082546	Mm.383561	100034684	331.3	1431.89	8.34879	9.50606	337.239	326.818	329.844	1410.41	1445.65	1439.61	8.35559	8.34614	8.34463	9.49789	9.5216	9.4987
A_55_P2073397	1.74957e-08	7.21509e-07	2.84056	up		chr3:045494446-045494387							1492.18	8204.15	10.7226	12.2287	1513.79	1455.67	1507.08	8231.21	8151.98	8229.27	10.7186	10.7078	10.7414	12.2384	12.2223	12.2255
A_51_P198835	1.75375e-08	7.21816e-07	2.71303	up	NM_013760	chr12:45307372-45307313	Dnajb9	Mus musculus DnaJ (Hsp40) homolog, subfamily B, member 9 (Dnajb9), mRNA [NM_013760]	GO:0051787|GO:0005515|GO:0005737|GO:0005783|GO:0005730|GO:0030433	NM_013760	Mm.27432	27362	2338.76	12317.9	11.4174	12.8573	2361.17	2335.05	2320.07	12315.6	12260.1	12378	11.4069	11.4379	11.4074	12.8616	12.8525	12.8578
A_55_P2104975	1.76827e-08	7.24954e-07	5.38812	up	NM_001168294	chr12:105458989-105459048	Serpina3f	Mus musculus serine (or cysteine) peptidase inhibitor, clade A, member 3F (Serpina3f), transcript variant 1, mRNA [NM_001168294]	GO:0030162|GO:0010951|GO:0004867|GO:0010466|GO:0043434|GO:0005576|GO:0034097|GO:0030414|GO:0005615	NM_001168294	Mm.483584	238393	43.1319	367.021	5.07405	7.50383	42.9972	43.1545	43.2439	359.733	368.525	372.805	5.05635	5.05753	5.10827	7.49365	7.50656	7.51129
A_52_P569348	1.78047e-08	7.27124e-07	3.26599	up	NM_010022	chr3:116252015-116252074	Dbt	Mus musculus dihydrolipoamide branched chain transacylase E2 (Dbt), mRNA [NM_010022]	GO:0042645|GO:0005739|GO:0048037|GO:0005737|GO:0016746|GO:0043754|GO:0015630|GO:0008152|GO:0046949|GO:0016740	NM_010022	Mm.3636	13171	127.248	773.337	6.86159	8.56911	127.391	127.738	126.615	763.711	783.481	772.82	6.84416	6.87069	6.86992	8.56888	8.58499	8.55346
A_55_P2003236	1.81992e-08	7.41793e-07	2.86725	up	AK054186	chr8:26708347-26708406	D830025C05Rik	Mus musculus 2 days pregnant adult female oviduct cDNA, RIKEN full-length enriched library, clone:E230026C02 product:hypothetical protein, full insert sequence. [AK054186]	GO:0008150|GO:0003674|GO:0005575		Mm.268349	100042416	837.945	4666.54	9.81438	11.3341	851.142	819.447	843.247	4569.88	4699.14	4730.61	9.81375	9.80189	9.82751	11.3171	11.3416	11.3434
A_52_P255841	1.85631e-08	7.43175e-07	2.79888	up	NM_031403	chr9:99484344-99484403	Dbr1	Mus musculus debranching enzyme homolog 1 (S. cerevisiae) (Dbr1), mRNA [NM_031403]	GO:0006397|GO:0090305|GO:0016787|GO:0008419|GO:0000398|GO:0000375|GO:0016788|GO:0005634|GO:0046872	NM_031403	Mm.31324	83703	590.256	3225.94	9.25624	10.7411	592.86	585.694	592.216	3214.58	3210.43	3252.83	9.23782	9.27035	9.26056	10.7515	10.733	10.7388
A_65_P18858	1.85652e-08	7.43175e-07	2.28181	up	NM_145455	chr13:99083643-99083239	Btf3	Mus musculus basic transcription factor 3 (Btf3), transcript variant 1, mRNA [NM_145455]	GO:0003674|GO:0006355|GO:0005634|GO:0001701|GO:0006351	NM_145455	Mm.371688	218490	14268.4	48410.2	14.1059	15.2961	14450.2	14020.5	14334.5	49541.6	47562.9	48126.2	14.0976	14.1044	14.1157	15.3056	15.2821	15.3005
A_66_P127224	1.85865e-08	7.43175e-07	3.0259	up	NM_010660	chr11:99246558-99246538	Krt10	Mus musculus keratin 10 (Krt10), mRNA [NM_010660]	GO:0005882|GO:0005515|GO:0005737|GO:0005198|GO:0030855|GO:0071277|GO:0045095	NM_010660	Mm.22662	16661	153.605	877.598	7.15871	8.75607	157.962	150.103	152.751	863.867	880.519	888.409	7.17857	7.1389	7.15866	8.74955	8.76024	8.75843
A_52_P423247	1.92119e-08	7.51824e-07	4.82896	up	NM_019840	chr4:102277888-102277947	Pde4b	Mus musculus phosphodiesterase 4B, cAMP specific (Pde4b), transcript variant 1, mRNA [NM_019840]	GO:0001780|GO:0050852|GO:0030018|GO:0048471|GO:0005634|GO:0050900|GO:0046872|GO:0005829|GO:0071944|GO:0006939|GO:0005737|GO:0030552|GO:0086004|GO:0006198|GO:0032729|GO:0004115|GO:0004114|GO:0032743|GO:0030593|GO:0005891|GO:0035690|GO:0044325|GO:0071222|GO:0016787|GO:0071872	NM_019840	Mm.20181	18578	341.796	3072.09	8.39847	10.6702	346.623	331.023	347.741	3014.32	3082.12	3119.83	8.39676	8.37153	8.42711	10.6587	10.674	10.6778
A_66_P106388	1.92317e-08	7.51824e-07	2.10677	up	NM_029499	chr19:11500973-11501032	Ms4a4c	Mus musculus membrane-spanning 4-domains, subfamily A, member 4C (Ms4a4c), mRNA [NM_029499]	GO:0008150|GO:0003674|GO:0005575	NM_029499	Mm.440715	64380	8131.06	29546.9	13.2508	14.3259	8277.31	8078.45	8037.41	29742.2	29367.9	29530.7	13.2492	13.2649	13.2383	14.3234	14.3234	14.3307
A_66_P123186	1.92769e-08	7.52193e-07	4.46147	up	NM_178684	chr14:47939120-47939179	Mapk1ip1l	Mus musculus mitogen-activated protein kinase 1 interacting protein 1-like (Mapk1ip1l), mRNA [NM_178684]	GO:0008150|GO:0003674|GO:0005575	NM_178684	Mm.212297	218975	295.923	2486.58	8.16854	10.3261	298.971	295.887	292.912	2500.58	2443.91	2515.24	8.16136	8.18498	8.15927	10.3496	10.3012	10.3273
A_51_P364786	1.97364e-08	7.58861e-07	3.44211	up	NM_024187	chr17:31795601-31791956	U2af1	Mus musculus U2 small nuclear ribonucleoprotein auxiliary factor (U2AF) 1 (U2af1), transcript variant 1, mRNA [NM_024187]	GO:0005515|GO:0006397|GO:0008380|GO:0003723|GO:0005634|GO:0050733|GO:0071013|GO:0003676|GO:0046872|GO:0019013|GO:0000166|GO:0016607|GO:0030529|GO:0005681|GO:0019012	NM_024187	Mm.379289	108121	588.53	3870.91	9.25067	11.034	607.589	571.593	586.408	3801.49	3874.29	3936.97	9.27264	9.23166	9.2477	11.023	11.0338	11.045
A_52_P546459	1.99552e-08	7.60779e-07	2.13558	up	NM_145420	chr10:70718581-70718522	Ube2d1	Mus musculus ubiquitin-conjugating enzyme E2D 1 (Ube2d1), mRNA [NM_145420]	GO:0005515|GO:0000209|GO:0006511|GO:0005737|GO:0004842|GO:0016881|GO:0000166|GO:0016874|GO:0031398|GO:0070936|GO:0005524	NM_145420	Mm.270530	216080	467.623	1992.07	8.89521	9.98984	473.006	458.666	471.196	1965.19	2004.21	2006.81	8.88398	8.8935	8.90815	9.98589	9.9987	9.98492
A_55_P2465382	2.007e-08	7.60779e-07	6.80041	up	AK172117	chr2:98507154-98507096		predicted gene 10800 [Source:MGI Symbol;Acc:MGI:3641657] [ENSMUST00000099683]					234.01	2879.95	7.80763	10.5733	235.866	230.79	235.373	2815.86	2958.79	2865.2	7.7964	7.80893	7.81757	10.5569	10.6133	10.5496
A_55_P2020461	2.01119e-08	7.60779e-07	2.81218	up	NM_016957	chr4:133522894-133522388	Hmgn2	Mus musculus high mobility group nucleosomal binding domain 2 (Hmgn2), mRNA [NM_016957]	GO:0003674|GO:0040034|GO:0006357|GO:0005634	NM_016957	Mm.319660	15331	587.035	3222.55	9.24817	10.7399	591.522	585.014	584.569	3163.97	3233.41	3270.28	9.23363	9.26814	9.24274	10.7305	10.7439	10.7452
A_55_P2058359	2.0224e-08	7.6171e-07	2.85698	up	NM_001159515	chr13:56205741-56205682	H2afy	Mus musculus H2A histone family, member Y (H2afy), transcript variant 4, mRNA [NM_001159515]	GO:0001740|GO:0000793|GO:0005813|GO:0046982|GO:0005694|GO:0003682|GO:0006334|GO:0005634|GO:0007549|GO:0000786|GO:0003677|GO:0016568	NM_001159515	Mm.283802	26914	574.627	3193.8	9.2123	10.7268	580.136	563.633	580.112	3135.94	3203.58	3241.88	9.20201	9.20389	9.23101	10.7136	10.731	10.7358
A_55_P2038273	2.08054e-08	7.74909e-07	3.58777	up		chr2:131926443-131926502							276.636	1879.78	8.05857	9.90166	277.644	276.474	275.79	1838.41	1906.33	1894.59	8.0452	8.07457	8.05593	9.88481	9.92298	9.89717
A_55_P1969997	2.08545e-08	7.74909e-07	3.41528	up	NM_001135727	chrX:156266451-156266510	Sh3kbp1	Mus musculus SH3-domain kinase binding protein 1 (Sh3kbp1), transcript variant 1, mRNA [NM_001135727]	GO:0005515|GO:0043005|GO:0017124|GO:0030054|GO:0008360|GO:0045202|GO:0006915|GO:0031410|GO:0006897|GO:0005737|GO:0016020|GO:0016477|GO:0007010|GO:0005856	NM_001135727	Mm.286495	58194	216.609	1394.09	7.68946	9.46146	221.15	212.098	216.58	1387.35	1408.57	1386.35	7.69914	7.67954	7.68969	9.46867	9.47836	9.43735
A_66_P104118	2.0858e-08	7.74909e-07	3.07959	up		chr19:012347564-012347623							148.519	862.707	7.10493	8.72767	151.463	146.625	147.47	845.794	858.948	883.38	7.11368	7.09911	7.10201	8.71294	8.71942	8.75065
A_51_P377376	2.1177e-08	7.77863e-07	2.11882	up	NM_153547	chr14:31826936-31826877	Gnl3	Mus musculus guanine nucleotide binding protein-like 3 (nucleolar) (Gnl3), transcript variant 1, mRNA [NM_153547]	GO:0006184|GO:0005515|GO:0000166|GO:0008283|GO:0042254|GO:0042127|GO:0005730|GO:0003924|GO:0005654|GO:0005634|GO:0005525	NM_153547	Mm.88512	30877	551.217	2342.35	9.15334	10.2366	554.062	545.424	554.165	2299.11	2356.26	2371.68	9.14035	9.15698	9.16268	10.2295	10.2462	10.2341
A_55_P1993293	2.14394e-08	7.79209e-07	2.74264	up	NM_180956	chr2:156753142-156753083	Ndrg3	Mus musculus N-myc downstream regulated gene 3 (Ndrg3), transcript variant 1, mRNA [NM_180956]	GO:0008150|GO:0003674|GO:0005737	NM_180956	Mm.279256	29812	2977.26	15703.9	11.7761	13.2316	3037.56	2905.04	2989.19	15735	15601.8	15774.9	11.7755	11.7579	11.7948	13.2337	13.2245	13.2366
A_51_P161086	2.1512e-08	7.79209e-07	6.13756	up	NM_008908	chr18:53566155-53566096	Ppic	Mus musculus peptidylprolyl isomerase C (Ppic), mRNA [NM_008908]	GO:0005515|GO:0042277|GO:0005737|GO:0006457|GO:0003755|GO:0016853	NM_008908	Mm.4587	19038	219.737	2492.09	7.71263	10.3303	220.388	218.069	220.754	2527.93	2453.4	2494.95	7.69635	7.72356	7.71797	10.3668	10.307	10.3171
A_55_P2016034	2.15507e-08	7.79209e-07	2.22424	up	NM_001033207	chr8:97051105-97051164	Nlrc5	Mus musculus NLR family, CARD domain containing 5 (Nlrc5), mRNA [NM_001033207]	GO:0005634|GO:0006952|GO:0032088|GO:0000979|GO:0005524|GO:0005829|GO:0060335|GO:0005737|GO:0000166|GO:0060339|GO:0045345|GO:0045087|GO:0045944|GO:0060340|GO:0043549	NM_001033207	Mm.334720	434341	9392.09	33936.3	13.45	14.6033	9532.62	9370.91	9272.75	34255.7	33684.1	33869.1	13.4465	13.4666	13.4368	14.6	14.6056	14.6042
A_55_P1969251	2.17106e-08	7.79209e-07	2.16101	up	NM_018821	chr18:89038639-89038580	Socs6	Mus musculus suppressor of cytokine signaling 6 (Socs6), mRNA [NM_018821]	GO:0035556|GO:0005515|GO:0001772|GO:0001678|GO:0050868|GO:0009968|GO:0040008|GO:0010498	NM_018821	Mm.91920	54607	306.255	1279.73	8.21883	9.33053	309.315	304.193	305.258	1269.79	1287.63	1281.78	8.21313	8.22858	8.21477	9.33517	9.33983	9.3166
A_51_P129100	2.19884e-08	7.83998e-07	2.72696	up	NM_153055	chr10:42543733-42547689	Sec63	Mus musculus SEC63-like (S. cerevisiae) (Sec63), mRNA [NM_153055]	GO:0006807|GO:0005783|GO:0006614|GO:0005623|GO:0010259|GO:0031204|GO:0015031|GO:0001889|GO:0005622|GO:0016020|GO:0008565|GO:0006810|GO:0072001|GO:0006620|GO:0016021	NM_153055	Mm.214344	140740	221.403	1159.32	7.7224	9.16969	227.779	217.545	218.885	1147.06	1157.14	1173.76	7.743	7.71687	7.70732	9.16728	9.16498	9.1768
A_51_P181286	2.20271e-08	7.83998e-07	3.38327	up	NM_001033122	chr6:129217756-129217697	Cd69	Mus musculus CD69 antigen (Cd69), mRNA [NM_001033122]	GO:0016020|GO:0005509|GO:0030246|GO:0016021|GO:0009897	NM_001033122	Mm.74745	12515	3081.72	19404.8	11.8311	13.5896	3160.79	3019.57	3064.8	19100.2	19384	19730.2	11.8428	11.8182	11.8325	13.5679	13.5928	13.608
A_52_P466090	2.21157e-08	7.84743e-07	2.90982	up	NM_018851	chr2:156931997-156930644	Samhd1	Mus musculus SAM domain and HD domain, 1 (Samhd1), transcript variant 1, mRNA [NM_018851]	GO:0051607|GO:0008081|GO:0016787|GO:0045087|GO:0003723|GO:0045088|GO:0005634|GO:0003824|GO:0003676|GO:0046872	NM_018851	Mm.248478	56045	5016.73	25765.3	12.5279	14.0688	5039.38	4984.04	5026.75	25531.2	25876.9	25887.7	12.5141	12.5345	12.5351	14.0496	14.0819	14.075
A_55_P2083153	2.22279e-08	7.84743e-07	2.39108	up	NM_001008547	chr5:146994085-146994026	1700001J03Rik	Mus musculus RIKEN cDNA 1700001J03 gene (1700001J03Rik), mRNA [NM_001008547]	GO:0008150|GO:0003674|GO:0005575	NM_001008547	Mm.373573	69282	46.4565	170.151	5.19447	6.45213	46.9951	47.1642	45.2102	167.862	170.819	171.772	5.20239	5.20495	5.17606	6.45807	6.45175	6.44656
A_55_P2028491	2.26202e-08	7.92913e-07	3.42291	up	NM_016957	chr4:133523729-133522878	Hmgn2	Mus musculus high mobility group nucleosomal binding domain 2 (Hmgn2), mRNA [NM_016957]	GO:0003674|GO:0040034|GO:0006357|GO:0005634	NM_016957	Mm.319660	15331	421.269	2765.3	8.73107	10.5063	432.834	417.186	413.787	2746.85	2749.83	2799.21	8.74816	8.7375	8.70756	10.5131	10.4928	10.5131
A_51_P294113	2.30099e-08	8.03893e-07	2.36774	up	NM_001081345	chr7:80572549-80572490	Chd2	Mus musculus chromodomain helicase DNA binding protein 2 (Chd2), mRNA [NM_001081345]	GO:0003674|GO:0005634|GO:0005575|GO:0060218|GO:0006974	NM_001081345	Mm.34955	244059	383.046	1788.37	8.58261	9.82612	392.878	377.744	378.516	1772.27	1793.56	1799.29	8.59689	8.5856	8.56534	9.83093	9.82751	9.81991
A_52_P277104	2.31134e-08	8.06171e-07	2.18153	up	NM_001033350	chr3:135716926-135716867	Bank1	Mus musculus B cell scaffold protein with ankyrin repeats 1 (Bank1), mRNA [NM_001033350]	GO:0005515|GO:0042113|GO:0019901|GO:0006874|GO:0005102	NM_001033350	Mm.30832	242248	4337.25	17718.8	12.3275	13.4528	4456.75	4219.24	4335.77	17621	17652.5	17882.9	12.3382	12.3131	12.3311	13.4433	13.4576	13.4576
A_66_P126915	2.35009e-08	8.11083e-07	7.64329	up	AK021326	chr9:116248565-116248624	D730003K21Rik	Mus musculus 10 days lactation, adult female mammary gland cDNA, RIKEN full-length enriched library, clone:D730003K21 product:unclassifiable, full insert sequence. [AK021326]	GO:0008150|GO:0003674|GO:0005575		Mm.44991	78580	56.5391	710.74	5.51559	8.44979	57.0119	57.8332	54.7722	692.638	712.22	727.361	5.51067	5.55262	5.48348	8.42896	8.45136	8.46903
A_55_P1968433	2.36655e-08	8.11083e-07	3.86581	up	NM_172715	chr5:101328054-101328113	Agpat9	Mus musculus 1-acylglycerol-3-phosphate O-acyltransferase 9 (Agpat9), mRNA [NM_172715]	GO:0006629|GO:0032006|GO:0016746|GO:0005783|GO:0004366|GO:0008654|GO:0003841|GO:0016020|GO:0008152|GO:0005789|GO:0019432|GO:0016021|GO:0016740	NM_172715	Mm.271911	231510	224.117	1615.9	7.74158	9.69235	230.799	218.348	223.204	1590.42	1600.93	1656.36	7.76273	7.72461	7.73741	9.68806	9.67642	9.71258
A_55_P2058783	2.38998e-08	8.17335e-07	2.86978	up	NM_023516	chr6:29225127-29225186	Hilpda	Mus musculus hypoxia inducible lipid droplet associated (Hilpda), transcript variant 2, mRNA [NM_023516]	GO:0005811|GO:0008284|GO:0009986|GO:0005102|GO:0006950|GO:0005576|GO:0010884|GO:0001819|GO:0035425|GO:0005615|GO:0016020|GO:0016021|GO:0030141	NM_023516	Mm.45161	69573	399.999	2236.48	8.64862	10.1696	407.183	391.77	401.044	2181.87	2264.34	2263.23	8.65145	8.6378	8.6566	10.1502	10.1872	10.1713
A_55_P1996983	2.39661e-08	8.17951e-07	3.53053	up	NM_001034856	chrX:35391445-35391386	4930430D24Rik	Mus musculus RIKEN cDNA 4930430D24 gene (4930430D24Rik), mRNA [NM_001034856]	GO:0008150|GO:0003674|GO:0005575	NM_001034856	Mm.422929	194735	4720.55	28671.9	12.4423	14.2622	4812.51	4577.29	4771.86	28575.8	28612	28827.9	12.4444	12.4239	12.4586	14.2429	14.2652	14.2785
A_51_P363187	2.50455e-08	8.38815e-07	37.2313	up	NM_008176	chr5:91321845-91321904	Cxcl1	Mus musculus chemokine (C-X-C motif) ligand 1 (Cxcl1), mRNA [NM_008176]	GO:0008009|GO:0002526|GO:0030593|GO:0002237|GO:0043268|GO:0005576|GO:0005125|GO:0005615|GO:0007204|GO:0006955|GO:0006954|GO:0010765|GO:0008083	NM_008176	Mm.21013	14825	5.6328	416.391	2.45896	7.67741	6.14222	5.75618	5	408.173	421.462	419.537	2.52428	2.47027	2.38233	7.66905	7.69128	7.67188
A_51_P411297	2.53435e-08	8.41295e-07	3.58459	up	NM_016714	chr15:84770217-84770276	Nup50	Mus musculus nucleoporin 50 (Nup50), mRNA [NM_016714]	GO:0005622|GO:0005515|GO:0031965|GO:0005487|GO:0005643|GO:0030529|GO:0005623|GO:0006913|GO:0001841	NM_016714	Mm.28379	18141	411.064	2808.77	8.69341	10.5352	424.226	402.426	406.539	2774.04	2808.81	2843.47	8.72256	8.68015	8.67751	10.5299	10.5368	10.539
A_51_P158061	2.54868e-08	8.42568e-07	2.56884	up	NM_026378	chr9:108472986-108473045	Dalrd3	Mus musculus DALR anticodon binding domain containing 3 (Dalrd3), mRNA [NM_026378]	GO:0008150|GO:0000166|GO:0006420|GO:0004814|GO:0005575|GO:0005524|GO:0004812|GO:0006418	NM_026378	Mm.458081	67789	131.667	631.55	6.91557	8.27669	133.452	129.836	131.711	624.168	638.193	632.29	6.91713	6.89994	6.92965	8.27821	8.28768	8.26418
A_55_P2127659	2.57563e-08	8.42931e-07	3.69471	up	NM_023858	chr9:13610046-13610105	Mtmr2	Mus musculus myotubularin related protein 2 (Mtmr2), transcript variant 1, mRNA [NM_023858]	GO:0030424|GO:0005634|GO:0030425|GO:0042803|GO:0005829|GO:0016791|GO:0005737|GO:0043197|GO:0048666|GO:0045806|GO:0004725|GO:0031642|GO:0005774|GO:0051262|GO:2000643|GO:2000645|GO:0046488|GO:0008021|GO:0032288|GO:0052866|GO:0097062|GO:0090394|GO:0016787|GO:0016020|GO:0016311|GO:0046855|GO:0097060|GO:0046856|GO:0005768|GO:0002091	NM_023858	Mm.210405	77116	179.796	1255.2	7.41019	9.29565	181.786	175.281	182.322	1241.65	1248.65	1275.31	7.40398	7.38988	7.43671	9.29601	9.28445	9.3065
A_66_P106478	2.59844e-08	8.4328e-07	2.07439	up	NM_009836	chr3:88124479-88124538	Cct3	Mus musculus chaperonin containing Tcp1, subunit 3 (gamma) (Cct3), mRNA [NM_009836]	GO:0005515|GO:0005886|GO:0005832|GO:0005874|GO:0007339|GO:0005524|GO:0044297|GO:0005737|GO:0000166|GO:0006457|GO:0002199|GO:0051082|GO:0044267	NM_009836	Mm.256034	12462	876.235	3676.23	9.89515	10.9478	894.791	857.543	876.371	3661.26	3661.35	3706.09	9.90768	9.88125	9.8965	10.9547	10.9417	10.947
A_55_P2058040	2.66905e-08	8.54185e-07	2.28833	up	X06519	chr6:69494412-69388212		immunoglobulin kappa chain variable 4-71 [Source:MGI Symbol;Acc:MGI:4439654] [ENSMUST00000101325]			Mm.347895		1140.76	5274.16	10.3086	11.5028	1174.38	1116.34	1131.57	5256.8	5281.08	5284.6	10.3257	10.3027	10.2972	11.5107	11.5022	11.4956
A_55_P1997086	2.67237e-08	8.54185e-07	2.74098	up	NM_016670	chr17:31742878-31742937	Pknox1	Mus musculus Pbx/knotted 1 homeobox (Pknox1), transcript variant 1, mRNA [NM_016670]	GO:0005515|GO:0030097|GO:0005667|GO:0006355|GO:0003700|GO:0046982|GO:0006357|GO:0006366|GO:0003705|GO:0005634|GO:0001525|GO:0003677|GO:0043565|GO:0005737|GO:0030217|GO:0045944|GO:0030218|GO:0043010|GO:0045893	NM_016670	Mm.259295	18771	87.8904	425.822	6.25473	7.70943	89.6472	86.8398	87.1841	423.594	430.639	423.234	6.26254	6.25222	6.24944	7.72153	7.71969	7.68705
A_55_P2026748	2.70201e-08	8.59711e-07	4.23937	up	NM_175446	chrX:131508017-131507958	Zmat1	Mus musculus zinc finger, matrin type 1 (Zmat1), mRNA [NM_175446]	GO:0008150|GO:0005634|GO:0003677|GO:0046872	NM_175446	Mm.336238	215693	83.8391	627.715	6.18421	8.26806	84.9433	84.0363	82.5377	609.439	625.964	647.741	6.18021	6.19753	6.1749	8.24657	8.25913	8.2985
A_51_P233027	2.72677e-08	8.65e-07	2.73392	up	NM_001033136	chr2:118963254-118963195	Rmdn3	Mus musculus regulator of microtubule dynamics 3 (Rmdn3), mRNA [NM_001033136]	GO:0005739|GO:0003674|GO:0005737|GO:0016020|GO:0005874|GO:0006874|GO:0006915|GO:0005741|GO:0005634|GO:0016021|GO:0005856|GO:0030154	NM_001033136	Mm.475909	67809	184.008	961.876	7.44508	8.89605	186.49	184.335	181.198	950.736	960.676	974.215	7.44381	7.46618	7.42524	8.89643	8.8935	8.89822
A_51_P257550	2.73722e-08	8.66649e-07	2.63361	up	NM_010807	chr4:129192947-129193006	Marcksl1	Mus musculus MARCKS-like 1 (Marcksl1), mRNA [NM_010807]	GO:0005516|GO:0008284|GO:0005737|GO:0016020|GO:0005886|GO:0003779|GO:0016192	NM_010807	Mm.424974	17357	556.837	2856.13	9.16697	10.564	569.211	553.612	547.689	2832.08	2856.38	2879.93	9.17604	9.18005	9.14483	10.5696	10.5612	10.5612
A_55_P1980020	2.74021e-08	8.66649e-07	2.25358	up	NM_025546	chr16:11193210-11193151	Rsl1d1	Mus musculus ribosomal L1 domain containing 1 (Rsl1d1), mRNA [NM_025546]	GO:0032880|GO:0005515|GO:0005730	NM_025546	Mm.28291	66409	5852.4	23510.3	12.742	13.9142	5958.92	5741.52	5856.76	23424.8	23583.6	23522.5	12.7415	12.7382	12.7464	13.8975	13.9297	13.9155
A_51_P375509	2.76027e-08	8.67995e-07	3.93753	up	NM_175318	chr7:54248220-54248161	Spty2d1	Mus musculus SPT2, Suppressor of Ty, domain containing 1 (S. cerevisiae) (Spty2d1), mRNA [NM_175318]	GO:0008150|GO:0003674|GO:0005575	NM_175318	Mm.155687	101685	168.77	1243.51	7.30388	9.28117	172.097	164.128	170.084	1220.02	1244.57	1265.93	7.31733	7.2741	7.3202	9.27035	9.28021	9.29296
A_55_P2170405	2.76098e-08	8.67995e-07	9.6301	up		chr18:060381571-060381630		1TPZ_A Chain A, Crystal Structure Of Iigp1: A Paradigm For Interferon Inducible P47 Resistance Gtpases. {Mus musculus} (exp=-1; wgp=-1; cg=-1), partial (25%) [TC1703733]					152.493	2629.29	7.14907	10.4166	155.254	150.672	151.552	2524.67	2664.14	2699.07	7.15703	7.14249	7.14769	10.3636	10.4395	10.4467
A_52_P61697	2.76739e-08	8.68714e-07	2.61335	up	NM_173434	chr11:48852113-48852054	9930111J21Rik2	Mus musculus RIKEN cDNA 9930111J21 gene 2 (9930111J21Rik2), mRNA [NM_173434]	GO:0008150|GO:0003674|GO:0005575	NM_173434	Mm.452996	245240	47.1054	191.133	5.21509	6.60099	46.8809	47.3939	47.0414	187.768	192.333	193.298	5.1969	5.21296	5.2354	6.59875	6.60579	6.59841
A_55_P2155560	2.79424e-08	8.69676e-07	2.21807	up	AF303881	chr12:115751671-115751612		Mus musculus clone J558.50 immunoglobulin heavy chain variable region mRNA, partial cds. [AF303881]			Mm.313389		213.204	910.3	7.66691	8.81621	214.116	211.059	214.437	905.083	913.468	912.348	7.65417	7.67144	7.67511	8.82512	8.82103	8.80249
A_55_P2083028	2.8015e-08	8.69676e-07	32.7851	up	XM_003086881	chr5:152084073-152084132	Gm6917	PREDICTED: Mus musculus predicted gene 6917 (Gm6917), mRNA [XM_003086881]		XM_003086881		628794	22.1503	1060.69	4.00172	9.03669	22.2514	21.7963	22.4031	1055.57	1066.99	1059.52	4.00231	3.93087	4.07199	9.04573	9.04472	9.01963
A_51_P199135	2.81282e-08	8.69676e-07	2.96385	up	NM_009856	chr13:43898276-43898335	Cd83	Mus musculus CD83 antigen (Cd83), mRNA [NM_009856]	GO:0014070|GO:0032733|GO:0016020|GO:0032743|GO:0043372|GO:0032713|GO:0016021|GO:0009897	NM_009856	Mm.57175	12522	1923.24	11042.1	11.1184	12.6859	1980.83	1875.32	1913.57	11026.9	11051.9	11047.6	11.1399	11.0999	11.1153	12.6957	12.6859	12.676
A_52_P573552	2.84385e-08	8.69676e-07	2.16022	up	NM_144549	chr15:59487662-59487721	Trib1	Mus musculus tribbles homolog 1 (Drosophila) (Trib1), mRNA [NM_144549]	GO:0032436|GO:0007254|GO:0031434|GO:0048662|GO:0005634|GO:0005524|GO:0043433|GO:0014912|GO:0050790|GO:0005737|GO:0004672|GO:0043405|GO:0032496|GO:0004860|GO:0055106|GO:0051443|GO:0006468|GO:0031665|GO:0006469|GO:0031625|GO:0008134|GO:0016772	NM_144549	Mm.40298	211770	611.276	2639.93	9.30957	10.4207	615.715	605.074	613.039	2604.38	2634.72	2680.69	9.29571	9.32188	9.31113	10.4148	10.4163	10.4312
A_52_P460957	2.84498e-08	8.69676e-07	3.55859	up	NM_013498	chr18:3267730-3267671	Crem	Mus musculus cAMP responsive element modulator (Crem), transcript variant 3, mRNA [NM_013498]	GO:0043565|GO:0005667|GO:0006355|GO:0003700|GO:0006687|GO:0045944|GO:0005634|GO:0007283|GO:0003677|GO:0006351	NM_013498	Mm.5244	12916	256.818	1725.67	7.94787	9.77917	258.041	257.638	254.775	1714.67	1726.06	1736.29	7.92738	7.97591	7.94032	9.7874	9.77835	9.77177
A_52_P355398	2.86247e-08	8.69676e-07	3.21596	up	NM_177445	chr1:130311944-130310284	Dars	Mus musculus aspartyl-tRNA synthetase (Dars), transcript variant 1, mRNA [NM_177445]	GO:0006422|GO:0005737|GO:0000166|GO:0016874|GO:0004815|GO:0003676|GO:0006412|GO:0005524|GO:0004812|GO:0006418	NM_177445	Mm.28693	226414	363.386	2255.91	8.49716	10.1824	368.21	353.983	367.966	2261.93	2233.37	2272.43	8.49483	8.47948	8.51716	10.1983	10.1682	10.1807
A_55_P2147397	2.86699e-08	8.69676e-07	4.88854	up	NM_176968	chr10:34118002-34117943	Nt5dc1	Mus musculus 5'-nucleotidase domain containing 1 (Nt5dc1), mRNA [NM_176968]	GO:0008150|GO:0003674|GO:0016787|GO:0005575|GO:0046872	NM_176968	Mm.73467	319638	133.777	1203.66	6.94089	9.23029	135.573	131.402	134.357	1169.25	1221.59	1220.14	6.94514	6.91946	6.95806	9.2005	9.25115	9.23923
A_55_P2163857	2.8697e-08	8.69676e-07	2.53387	up	NM_001146007	chr7:111488610-111488551	Trim12c	Mus musculus tripartite motif-containing 12C (Trim12c), transcript variant 1, mRNA [NM_001146007]	GO:0005737|GO:0004842|GO:0002221|GO:0016567|GO:0005794|GO:0000932|GO:0005634|GO:0046872|GO:0042803|GO:0042802|GO:0008329	NM_001146007	Mm.425502	319236	207.767	1012.76	7.63108	8.97242	211.589	205.502	206.21	1000.59	1027.67	1010.03	7.63549	7.63854	7.61921	8.97626	8.98645	8.95455
A_52_P444785	2.90647e-08	8.77028e-07	3.15466	up	BC037393	chr5:151451117-151451058	N4bp2l2	NEDD4 binding protein 2-like 2 [Source:MGI Symbol;Acc:MGI:2687207] [ENSMUST00000144378]	GO:0005515|GO:0001824|GO:0005634|GO:0001701		Mm.483988	381695	270.153	1607.72	8.02658	9.68406	277.56	262.838	270.06	1576.54	1627.04	1619.58	8.0444	8.00563	8.0297	9.67529	9.69998	9.67692
A_52_P382939	2.92587e-08	8.77356e-07	2.93212	up	NM_181854	chr8:13880090-13880149	Champ1	Mus musculus chromosome alignment maintaining phosphoprotein 1 (Champ1), mRNA [NM_181854]	GO:0000793|GO:0005694|GO:0034501|GO:0005819|GO:0035372|GO:0005634|GO:0031134|GO:0003676|GO:0046872|GO:0051315|GO:0005737|GO:0000777|GO:0000776|GO:0005856|GO:0000775	NM_181854	Mm.289346	101994	115.372	621.688	6.70294	8.25488	115.404	114.938	115.773	609.406	629.263	626.395	6.68217	6.7059	6.72073	8.24625	8.26759	8.25081
A_52_P48689	2.93547e-08	8.78219e-07	2.1967	up	NM_025824	chr1:58462956-58463015	Bzw1	Mus musculus basic leucine zipper and W2 domains 1 (Bzw1), mRNA [NM_025824]	GO:0008150|GO:0003674|GO:0006355|GO:0005737|GO:0006351	NM_025824	Mm.21848	66882	2939.29	12657.1	11.7574	12.8927	2967.66	2899.13	2951.08	12648.4	12717.5	12605.3	11.7494	11.7563	11.7664	12.8941	12.906	12.878
A_51_P405638	2.97771e-08	8.86556e-07	2.82316	up	S63552	chr12:115379137-115379078		mAb BA.N1:1.8 H chain V region [mice, B cell hybridoma, BALB/c, mRNA Partial, 294 nt]. [S63552]			Mm.313360		240.896	1289.43	7.846	9.34331	248.79	237.459	236.438	1276.15	1292.56	1299.57	7.86744	7.84624	7.82433	9.34549	9.34461	9.33983
A_51_P497171	2.98804e-08	8.86556e-07	2.50739	up	NM_008534	chr1:173518790-173518744	Ly9	Mus musculus lymphocyte antigen 9 (Ly9), transcript variant 1, mRNA [NM_008534]	GO:0016020|GO:0004872|GO:0016021|GO:0007155	NM_008534	Mm.560	17085	727.366	3597.36	9.58711	10.9133	734.953	723.985	723.16	3557.2	3572.76	3662.13	9.57818	9.60363	9.57953	10.9099	10.9024	10.9276
A_51_P265495	2.99453e-08	8.86556e-07	12.7732	up	NM_010738	chr15:74825612-74825553	Ly6a	Mus musculus lymphocyte antigen 6 complex, locus A (Ly6a), transcript variant 3, mRNA [NM_010738]	GO:0005622|GO:0016020|GO:0005886|GO:0031225|GO:0009897	NM_010738	Mm.425949	110454	693.881	15212.8	9.50751	13.1826	726.016	664.049	691.577	14919.2	15291.3	15428	9.55896	9.46526	9.49831	13.1543	13.1941	13.1993
A_55_P2220937	3.03008e-08	8.91719e-07	5.43966	up	NM_027715	chr2:19581254-19581313	Otud1	Mus musculus OTU domain containing 1 (Otud1), mRNA [NM_027715]	GO:0004843|GO:0070536|GO:0016787|GO:0006508|GO:0008233|GO:0008234|GO:0005575	NM_027715	Mm.83981	71198	276.666	2758.19	8.0594	10.5029	281.362	279.969	268.668	2727.23	2776.23	2771.12	8.06584	8.09034	8.02202	10.5014	10.5123	10.4951
A_55_P2088720	3.03147e-08	8.91719e-07	3.26852	up	AK035396	chr7:18125402-18125459		Mus musculus adult male urinary bladder cDNA, RIKEN full-length enriched library, clone:9530030H05 product:unclassifiable, full insert sequence. [AK035396]					10138.2	48051.6	13.5763	15.285	10506.7	9854.74	10053.2	48605.3	47644.9	47904.7	13.6011	13.556	13.5718	15.2738	15.2883	15.2927
A_51_P473498	3.05239e-08	8.92496e-07	2.33416	up	NM_173398	chr3:58901201-58901142	Gpr171	Mus musculus G protein-coupled receptor 171 (Gpr171), mRNA [NM_173398]	GO:0008150|GO:0007165|GO:0003674|GO:0016020|GO:0007186|GO:0005886|GO:0004930|GO:0016021|GO:0004871	NM_173398	Mm.123648	229323	1332.39	6233.85	10.5465	11.7694	1359.67	1324.88	1312.63	6188.16	6235.45	6277.94	10.5524	10.5604	10.5267	11.773	11.7676	11.7676
A_66_P112546	3.05464e-08	8.92496e-07	2.71226	up	NM_026570	chr10:116657646-116657483	Yeats4	Mus musculus YEATS domain containing 4 (Yeats4), mRNA [NM_026570]	GO:0005515|GO:0006355|GO:0043967|GO:0043968|GO:0035267|GO:0005654|GO:0005634|GO:0008022|GO:0040008|GO:0006351|GO:0016568	NM_026570	Mm.233529	64050	561.872	2964.41	9.17885	10.6183	564.241	550.549	570.827	2928.25	2974.27	2990.7	9.1623	9.17183	9.20241	10.6168	10.6208	10.6173
A_55_P2080119	3.06214e-08	8.92496e-07	2.02517	up		chr8:004861313-004861372							18942.5	55411.8	14.5913	15.6094	19267	18788.4	18772.1	56025.1	55112.8	55097.4	14.5861	14.6056	14.5823	15.6001	15.6131	15.615
A_55_P2020458	3.07252e-08	8.92496e-07	2.93991	up		chr2:128413629-128413570							1245.07	7129.88	10.4392	11.995	1256.81	1224.31	1254.08	7164.3	7081.81	7143.52	10.4246	10.4378	10.4552	12.0144	11.9839	11.9868
A_51_P347452	3.0766e-08	8.92496e-07	2.75369	up	NM_028242	chrX:54319366-54319425	Htatsf1	Mus musculus HIV TAT specific factor 1 (Htatsf1), transcript variant 1, mRNA [NM_028242]	GO:0008150|GO:0003674|GO:0006355|GO:0000166|GO:0003723|GO:0005634|GO:0003676|GO:0006351	NM_028242	Mm.2152	72459	736.865	3955.27	9.60968	11.0711	741.011	733.405	736.179	3942.51	3971.11	3952.17	9.59335	9.62473	9.61098	11.0844	11.0731	11.0556
A_51_P361951	3.08079e-08	8.92496e-07	2.14335	up	NM_025710	chr13:30632422-30632363	Uqcrfs1	Mus musculus ubiquinol-cytochrome c reductase, Rieske iron-sulfur polypeptide 1 (Uqcrfs1), mRNA [NM_025710]	GO:0005515|GO:0031966|GO:0051536|GO:0051537|GO:0070469|GO:0016679|GO:0005743|GO:0005750|GO:0032403|GO:0046872|GO:0005739|GO:0008121|GO:0016020|GO:0006810|GO:0016491|GO:0016021|GO:0055114	NM_025710	Mm.181933	66694	8900.46	31663.8	13.3732	14.4731	9157.27	8637.96	8906.13	31817.6	31530.2	31643.6	13.3852	13.3551	13.3793	14.4744	14.4744	14.4704
A_51_P516870	3.09765e-08	8.95011e-07	2.26745	up	NM_008409	chrX:104592975-104592916	Itm2a	Mus musculus integral membrane protein 2A (Itm2a), mRNA [NM_008409]	GO:0016020|GO:0016021	NM_008409	Mm.193	16431	876.891	3966.89	9.89571	11.0768	884.833	862.261	883.58	3903.64	3973.04	4023.99	9.88554	9.89038	9.91122	11.0666	11.0757	11.088
A_55_P2006604	3.1085e-08	8.95011e-07	3.8954	up	NM_026054	chr6:149279954-149280013	2810474O19Rik	Mus musculus RIKEN cDNA 2810474O19 gene (2810474O19Rik), mRNA [NM_026054]	GO:0008150|GO:0003674|GO:0005575	NM_026054	Mm.333515	67246	321.256	2374.69	8.29633	10.2581	329.087	316.889	317.792	2299.18	2396.79	2428.09	8.31245	8.29528	8.28127	10.2303	10.2696	10.2744
A_51_P463846	3.14468e-08	8.98332e-07	5.04209	up	NM_145545	chr3:142209379-142209438	Gbp7	Mus musculus guanylate binding protein 7 (Gbp7), transcript variant 1, mRNA [NM_145545]	GO:0003674|GO:0071346|GO:0050830|GO:0020005|GO:0042832|GO:0051856|GO:0031410	NM_145545	Mm.45740	229900	656.653	6175.81	9.42119	11.7552	673.967	655.925	640.067	6143.66	6112.27	6271.5	9.43337	9.44396	9.38623	11.7624	11.7375	11.7657
A_52_P67983	3.15449e-08	8.98332e-07	2.29708	up	NM_177846	chr2:120964506-120964447	Lcmt2	Mus musculus leucine carboxyl methyltransferase 2 (Lcmt2), mRNA [NM_177846]	GO:0006481|GO:0008168|GO:0003880|GO:0005575|GO:0032259|GO:0016740|GO:0008033	NM_177846	Mm.219449	329504	246.946	1094.88	7.88538	9.08518	251.19	242.355	247.294	1074.11	1091.17	1119.35	7.87923	7.88048	7.89643	9.07541	9.07783	9.1023
A_55_P2120607	3.1646e-08	8.9943e-07	3.5112	up	AJ249823	chr6:41071685-41071744		Mus musculus TRBV gene for T-cell receptor beta chain, variable region, 280BP. [AJ249823]			Mm.123831		159.382	1051.57	7.21233	9.0243	163.752	155.628	158.768	1049.25	1046.33	1059.14	7.23764	7.19084	7.20851	9.03868	9.01575	9.01846
A_55_P1976387	3.19152e-08	9.01388e-07	2.61416	up	NM_001243199	chr6:48640752-48640811	Gimap4	Mus musculus GTPase, IMAP family member 4 (Gimap4), transcript variant 3, mRNA [NM_001243199]	GO:0005737|GO:0000166|GO:0005634|GO:0005525|GO:0005829	NM_001243199	Mm.333048	107526	1902.56	9643.17	11.098	12.4843	1931.93	1874.15	1901.59	9485.42	9661.05	9783.05	11.0936	11.0982	11.1021	12.4618	12.4909	12.5002
A_51_P438479	3.19575e-08	9.01388e-07	4.16046	up	NM_177643	chr1:138524591-138524650	Zfp281	Mus musculus zinc finger protein 281 (Zfp281), transcript variant 2, mRNA [NM_177643]	GO:0005515|GO:0006355|GO:0010172|GO:0003700|GO:0044212|GO:0003714|GO:0001047|GO:0005634|GO:0003676|GO:0003677|GO:0046872|GO:0006351|GO:0030154|GO:0048863|GO:0043565|GO:0010629|GO:0045893|GO:0045892	NM_177643	Mm.62521	226442	3394.35	25064.4	11.9649	14.0217	3453.24	3328.06	3401.76	24821	25320	25052.1	11.9678	11.9578	11.9692	13.9918	14.0514	14.0218
A_55_P2109534	3.22556e-08	9.01388e-07	7.29477	up	NM_001242360	chr6:106727599-106727658	Trnt1	Mus musculus tRNA nucleotidyl transferase, CCA-adding, 1 (Trnt1), transcript variant 3, mRNA [NM_001242360]	GO:0006396|GO:0005813|GO:0009022|GO:0052927|GO:0000049|GO:0003723|GO:0016779|GO:0004810|GO:0005524|GO:0042780|GO:0008033|GO:0005622|GO:0005739|GO:0000166|GO:0001680|GO:0052929|GO:0052928|GO:0016740	NM_001242360	Mm.196332	70047	5.76576	78.278	2.50676	5.37362	6.08283	5.73502	5.47941	78.3476	77.7725	78.7138	2.51974	2.46851	2.53202	5.40329	5.35518	5.36239
A_51_P314907	3.23777e-08	9.01388e-07	4.17356	up	NM_013726	chr5:8397548-8397489	Dbf4	Mus musculus DBF4 homolog (S. cerevisiae) (Dbf4), transcript variant 1, mRNA [NM_013726]	GO:0006260|GO:0007049|GO:0004674|GO:0008270|GO:0006468|GO:0005634|GO:0003676|GO:0007089|GO:0046872	NM_013726	Mm.292470	27214	540.763	4241.13	9.12331	11.1846	539.487	532.148	550.655	4200.6	4207.69	4315.1	9.09786	9.11975	9.15231	11.1834	11.1716	11.1988
A_55_P1954965	3.2525e-08	9.01388e-07	2.56358	up	NM_001252261	chr11:33056991-33056689	Npm1	Mus musculus nucleophosmin 1 (Npm1), transcript variant 3, mRNA [NM_001252261]	GO:0005515|GO:0048025|GO:0001652|GO:0032071|GO:0051259|GO:0042803|GO:0006884|GO:0005622|GO:0043523|GO:0006407|GO:0045860|GO:0051260|GO:0043023|GO:0042273|GO:0043024|GO:0042274|GO:0005856|GO:0005813|GO:0046982|GO:0019901|GO:0007569|GO:0045740|GO:0003713|GO:0006950|GO:0006334|GO:0005547|GO:0043085|GO:0030957|GO:0006281|GO:0016049|GO:0005654|GO:0051082|GO:0019899|GO:0060735|GO:0008284|GO:0008285|GO:…	NM_001252261	Mm.485384	18148	16518.1	57532.4	14.3214	15.6795	17049.6	16059.7	16445	58269.6	57411.2	56916.5	14.339	14.3097	14.3155	15.6647	15.6883	15.6856
A_55_P2184414	3.25735e-08	9.01388e-07	2.02524	up	NM_145600	chr8:85287939-85287880	Zfp330	Mus musculus zinc finger protein 330 (Zfp330), mRNA [NM_145600]	GO:0005694|GO:0005730|GO:0030496|GO:0008270|GO:0005634|GO:0046872|GO:0000775	NM_145600	Mm.269248	30932	3023.05	11987	11.801	12.8191	3086.23	2999.54	2983.38	12052.6	11943.4	11965.1	11.8058	11.8068	11.7904	12.8323	12.8161	12.8088
A_52_P180373	3.26068e-08	9.01388e-07	2.56521	up	NM_010821	chr19:12537697-12537756	Mpeg1	Mus musculus macrophage expressed gene 1 (Mpeg1), mRNA [NM_010821]	GO:0016020|GO:0016021	NM_010821	Mm.3999	17476	605.844	3039.23	9.29627	10.6553	615.275	598.196	604.061	3052.91	3024	3040.76	9.29482	9.30425	9.28974	10.677	10.6462	10.6429
A_51_P390937	3.2913e-08	9.01388e-07	2.79674	up	JX420695	chr6:68206771-68206830		Mus musculus clone SMN-1-2 immunoglobulin kappa light chain variable region mRNA, partial cds. [JX420695]			Mm.333117		704.896	3837.54	9.53572	11.0195	707.624	695.589	711.475	3769.62	3860.51	3882.48	9.51272	9.54452	9.54992	11.009	11.0264	11.023
A_55_P2370096	3.30054e-08	9.01388e-07	2.62071	up	BB453506	chr2:53022723-53022664		BB453506 RIKEN full-length enriched, 12 days embryo spinal ganglion Mus musculus cDNA clone D130023J16 3'. [BB453506]			Mm.406147		564.097	2876.25	9.18427	10.5742	568.286	557.747	566.258	2816.15	2871.1	2941.49	9.17224	9.18919	9.19139	10.5579	10.5715	10.5933
A_51_P328669	3.30133e-08	9.01388e-07	2.23694	up	NM_001033201	chr4:46183371-46183430	Ncbp1	Mus musculus nuclear cap binding protein subunit 1 (Ncbp1), mRNA [NM_001033201]	GO:0008380|GO:0000339|GO:0005515|GO:0006379|GO:0006397|GO:0016070|GO:0003723|GO:0045292|GO:0006370|GO:0005634|GO:0031047|GO:0006417|GO:0005737|GO:0006406|GO:0000184|GO:0030529|GO:0006446|GO:0006810|GO:0051028|GO:0005845|GO:0031442|GO:0005846	NM_001033201	Mm.389536	433702	602.167	2675.59	9.28552	10.447	606.182	591.591	608.727	2643.33	2677.4	2706.05	9.26737	9.28864	9.30054	10.4438	10.4455	10.4518
A_55_P2180805	3.3071e-08	9.01388e-07	2.32039	up	NM_001164195	chr10:13247609-13247550	Pex3	Mus musculus peroxisomal biogenesis factor 3 (Pex3), transcript variant 2, mRNA [NM_001164195]	GO:0005783|GO:0045046|GO:0005634|GO:0043231|GO:0005829|GO:0008289|GO:0043234|GO:0016020|GO:0005887|GO:0032994|GO:0046983|GO:0007031|GO:0016021|GO:0005779|GO:0016557|GO:0005778|GO:0005777	NM_001164195	Mm.282711	56535	616.65	2813.28	9.32349	10.5379	627.901	611.087	610.961	2786.81	2798.81	2854.21	9.32489	9.33953	9.30605	10.5385	10.5307	10.5444
A_51_P174681	3.3224e-08	9.02799e-07	3.44939	up	NM_025840	chr12:36836300-36834179	Bzw2	Mus musculus basic leucine zipper and W2 domains 2 (Bzw2), mRNA [NM_025840]	GO:0008150|GO:0003674|GO:0007275|GO:0005575|GO:0030154|GO:0007399	NM_025840	Mm.288669	66912	1042.9	6914.87	10.161	11.9473	1073.61	1008.72	1046.37	6807.6	6903.63	7033.38	10.178	10.1346	10.1703	11.9344	11.9466	11.961
A_55_P2104425	3.33665e-08	9.05501e-07	6.54043	up	NM_001005784	chr4:98164262-98164321	Inadl	Mus musculus InaD-like (Drosophila) (Inadl), transcript variant 2, mRNA [NM_001005784]	GO:0005515|GO:0043234|GO:0048471|GO:0005737|GO:0030054|GO:0016020|GO:0005886|GO:0045177|GO:0005923	NM_001005784	Mm.90218	12695	160.742	1916.18	7.22341	9.9328	158.469	162.467	161.29	1880.03	1935.03	1933.47	7.18177	7.25684	7.23163	9.92111	9.94763	9.92966
A_55_P2138627	3.36687e-08	9.07685e-07	10.6568	up	M32051	chr12:115630042-115629983		Mouse Ig active H-chain (GAC1) mRNA V-region, from hybridoma 66.3E3, partial cds. [M32051]			Mm.422809		292.979	5477.36	8.15034	11.564	295.713	299.32	283.905	5414.66	5470.26	5547.17	8.1432	8.20439	8.10343	11.5595	11.5621	11.5705
A_51_P201468	3.37889e-08	9.07685e-07	3.26703	up	NM_010938	chr6:30101693-30101752	Nrf1	Mus musculus nuclear respiratory factor 1 (Nrf1), transcript variant 6, mRNA [NM_010938]	GO:0005667|GO:0006355|GO:0005737|GO:0003700|GO:0051602|GO:0005634|GO:0007005|GO:0003677|GO:0006351	NM_010938	Mm.259258	18181	53.1683	278.679	5.41363	7.12161	53.7536	52.5877	53.1637	278.76	274.689	282.588	5.41827	5.39441	5.42822	7.13844	7.10125	7.12515
A_51_P164030	3.38478e-08	9.07685e-07	2.10408	up	NM_013686	chr17:13116096-13116155	Tcp1	Mus musculus t-complex protein 1 (Tcp1), mRNA [NM_013686]	GO:0000792|GO:0005515|GO:0005813|GO:0030054|GO:0005794|GO:0005886|GO:0001669|GO:0005815|GO:0005832|GO:0005874|GO:0005634|GO:0007339|GO:0005524|GO:0044297|GO:0005720|GO:0005737|GO:0000166|GO:0006457|GO:0002199|GO:0051082|GO:0005856|GO:0044267|GO:0000242	NM_013686	Mm.229342	21454	2741.91	11313.8	11.6544	12.7276	2774.94	2702.79	2747.99	11366.5	11206.2	11368.8	11.6498	11.6502	11.6633	12.7426	12.7146	12.7256
A_52_P125350	3.39295e-08	9.07894e-07	2.84852	up	NM_023210	chr3:95750223-95750282	Anp32e	Mus musculus acidic (leucine-rich) nuclear phosphoprotein 32 family, member E (Anp32e), transcript variant 1, mRNA [NM_023210]	GO:0005737|GO:0016023|GO:0005634|GO:0019212|GO:0043086	NM_023210	Mm.218657	66471	688.46	3809	9.4955	11.0057	694.192	674.321	696.868	3745.85	3838.53	3842.61	9.47886	9.49026	9.51737	10.9949	11.0171	11.0051
A_55_P2068148	3.40156e-08	9.08133e-07	2.58392	up	NM_019663	chr9:62740051-62739992	Pias1	Mus musculus protein inhibitor of activated STAT 1 (Pias1), mRNA [NM_019663]	GO:0005515|GO:0016874|GO:0032436|GO:0005634|GO:0046872|GO:0005622|GO:0019789|GO:0042127|GO:0033235|GO:0051152|GO:2001141|GO:0031625|GO:0006355|GO:0003714|GO:0016925|GO:0019904|GO:0000122|GO:0003676|GO:0007259|GO:0003677|GO:0065004|GO:0006351|GO:0016605|GO:0008270|GO:0019899|GO:0045893	NM_019663	Mm.431253	56469	168.765	831.516	7.30409	8.67365	168.598	168.091	169.604	820.825	840.466	833.256	7.28333	7.31215	7.31679	8.67473	8.68282	8.6634
A_55_P2167347	3.41234e-08	9.08133e-07	2.13706	up	X53355	chr6:67846563-67846622		Mouse mRNA for the V(kappa) region from an anti-phosphatidyl choline producing hybridoma (NC19-F5). [X53355]			Mm.333111		167.054	679.107	7.28655	8.38217	167.903	167.267	165.992	671.262	684.542	681.517	7.27513	7.30165	7.28286	8.38833	8.38665	8.37153
A_65_P05358	3.41341e-08	9.08133e-07	2.64107	up	AK131578	chrM:2898-2957	ND1	mitochondrially encoded NADH dehydrogenase 1 [Source:MGI Symbol;Acc:MGI:101787] [ENSMUST00000082392]	GO:0005739|GO:0016020|GO:0070469|GO:0043025|GO:0016491|GO:0006810|GO:0005743|GO:0016021|GO:0008137|GO:0033194|GO:0030425|GO:0055114		Mm.455354	17716	31189.7	99727.8	15.4364	16.8375	31791.6	30693.9	31083.5	102935	98663.4	97584.6	15.4174	15.4437	15.4481	16.8236	16.8492	16.8398
A_52_P232830	3.44412e-08	9.08867e-07	4.58236	up	NM_011808	chr9:32561826-32561885	Ets1	Mus musculus E26 avian leukemia oncogene 1, 5' domain (Ets1), transcript variant 1, mRNA [NM_011808]	GO:0005515|GO:0008284|GO:0003700|GO:0030262|GO:0006366|GO:0005634|GO:0010715|GO:0030578|GO:0045944|GO:0048870|GO:0046677|GO:0035035|GO:0005667|GO:0006355|GO:0030335|GO:0006357|GO:0097194|GO:0045765|GO:0045786|GO:0003677|GO:0006351|GO:0045766|GO:0010595|GO:0043565|GO:0045648|GO:0045893|GO:0051272	NM_011808	Mm.292415	23871	855.017	7367.07	9.85169	12.0478	863.774	854.838	846.438	7422.94	7234.08	7444.18	9.84323	9.87464	9.8372	12.0716	12.0195	12.0523
A_52_P238902	3.45578e-08	9.09661e-07	4.5045	up	NM_024262	chr11:86891322-86891263	Smg8	Mus musculus smg-8 homolog, nonsense mediated mRNA decay factor (C. elegans) (Smg8), mRNA [NM_024262]	GO:0045859|GO:0003674|GO:0000184|GO:0005575	NM_024262	Mm.23257	74133	88.3937	703.87	6.26338	8.43475	90.7897	85.8974	88.4942	685.508	707.185	718.918	6.28493	6.23213	6.27309	8.4152	8.4401	8.44895
A_52_P475450	3.48208e-08	9.09754e-07	3.30887	up	NM_172991	chr5:3595331-3595272	Rbm48	Mus musculus RNA binding motif protein 48 (Rbm48), mRNA [NM_172991]	GO:0008150|GO:0003674|GO:0003723|GO:0005634	NM_172991	Mm.38014	269623	120.965	740.414	6.78072	8.50706	123.594	121.129	118.173	742.089	739.236	739.918	6.7963	6.78461	6.76125	8.52838	8.5011	8.49171
A_55_P2040921	3.54028e-08	9.21524e-07	4.06771	up	BY763388	chr15:98373278-98373219	Ccnt1	cyclin T1 [Source:MGI Symbol;Acc:MGI:1328363] [ENSMUST00000169707]	GO:0005515|GO:0006355|GO:0008024|GO:0044212|GO:0019901|GO:0005730|GO:0005634|GO:0000079|GO:0003677|GO:0006351|GO:0007049|GO:0003682|GO:0017069|GO:0006468|GO:0051301		Mm.488962	12455	421.085	3258	8.73291	10.7571	420.417	423.51	419.329	3219.96	3257.95	3296.09	8.70625	8.76614	8.72633	10.7538	10.7561	10.7614
A_55_P2183110	3.55393e-08	9.23934e-07	5.38306	up	NM_008031	chrX:65948200-65948259	Fmr1	Mus musculus fragile X mental retardation syndrome 1 (Fmr1), mRNA [NM_008031]	GO:0005515|GO:0043005|GO:0071598|GO:0010494|GO:0003723|GO:0045202|GO:0005634|GO:0007417|GO:0030425|GO:0005737|GO:0043197|GO:0043198|GO:0006810|GO:0045947|GO:0051028|GO:0005844|GO:0005845	NM_008031	Mm.3451	14265	19.68	145.945	3.80496	6.23339	19.493	20.4499	19.0971	144.137	144.374	149.325	3.7728	3.83865	3.80345	6.23776	6.21503	6.24738
A_55_P2089820	3.58327e-08	9.2812e-07	2.71366	up	NM_001243041	chr14:22059713-22059772	Adk	Mus musculus adenosine kinase (Adk), transcript variant 2, mRNA [NM_001243041]	GO:0046085|GO:0005634|GO:0005524|GO:0046872|GO:0005829|GO:0006166|GO:0016310|GO:0005737|GO:0006167|GO:0044342|GO:0000166|GO:0004001|GO:0016301|GO:0042102|GO:0016773|GO:0006175|GO:0010613|GO:0016740	NM_001243041	Mm.188734	11534	274.035	1414.44	8.04622	9.48646	280.741	267.689	273.675	1410.48	1420.1	1412.75	8.06301	8.03015	8.0455	9.4987	9.49026	9.47043
A_51_P155336	3.58938e-08	9.28379e-07	4.06826	up	M19903	chr12:115884948-115884889		Mouse Ig rearranged gamma-chain mRNA, clone AN11g. [M19903]			Mm.390473		77.1737	547.698	6.04097	8.06538	78.464	75.9867	77.0703	532.176	559.56	551.357	6.04761	6.01701	6.05829	8.04471	8.08882	8.06261
A_51_P351481	3.5931e-08	9.28379e-07	2.43325	up	NM_019937	chr3:65751624-65750823	Ccnl1	Mus musculus cyclin L1 (Ccnl1), mRNA [NM_019937]	GO:0005515|GO:0006396|GO:0006355|GO:0005737|GO:0019901|GO:0016607|GO:0005634|GO:0000079|GO:0008023|GO:0006351	NM_019937	Mm.175612	56706	1476.31	7108.68	10.7097	11.9926	1490.22	1468.28	1470.43	7015.06	7080.48	7230.51	10.6969	10.7245	10.7078	11.9875	11.9821	12.0082
A_52_P679152	3.61159e-08	9.3087e-07	2.77	up	NM_001042634	chr1:58470285-58469863	Clk1	Mus musculus CDC-like kinase 1 (Clk1), transcript variant 1, mRNA [NM_001042634]	GO:0005515|GO:0018108|GO:0005634|GO:0005524|GO:0016310|GO:0005737|GO:0046777|GO:0004672|GO:0018105|GO:0000166|GO:0004674|GO:0016301|GO:0018107|GO:0043484|GO:0004712|GO:0006468|GO:0004713|GO:0016740|GO:0016772	NM_001042634	Mm.1761	12747	5038.02	24834.9	12.5299	13.9998	5166.35	4941.96	5005.75	24833.8	24938.1	24732.7	12.5439	12.5181	12.5277	13.9935	14.0203	13.9855
A_51_P266248	3.62757e-08	9.32064e-07	4.91249	up	AK134885	chr12:114654336-114654277	Ighv14-2	Mus musculus adult male olfactory brain cDNA, RIKEN full-length enriched library, clone:6430508A06 product:Ig delta chain C region membrane-bound form, full insert sequence. [AK134885]			Mm.491093	668421	892.381	8163.11	9.92312	12.2196	917.444	866.591	893.108	8295.5	8031.73	8162.1	9.94171	9.90135	9.9263	12.2515	12.1964	12.2109
A_55_P2149011	3.63748e-08	9.32969e-07	7.96323	up	AK017853	chr12:75033965-75034024	Hif1a	Mus musculus 8 days embryo whole body cDNA, RIKEN full-length enriched library, clone:5730564B02 product:hypoxia inducible factor 1, alpha subunit, full insert sequence. [AK017853]	GO:0005515|GO:0010468|GO:0000988|GO:0003700|GO:0006366|GO:0003705|GO:0001755|GO:0032403|GO:0030154|GO:0001947|GO:0006879|GO:0042127|GO:0031625|GO:0001944|GO:0035035|GO:0006089|GO:0019901|GO:0014850|GO:0001892|GO:0030502|GO:0008542|GO:0032963|GO:0019896|GO:0019899|GO:0032364|GO:0008134|GO:0030949|GO:0032007|GO:0008284|GO:0021987|GO:0005634|GO:0001837|GO:0010870|GO:0005737|GO:0004871|GO:0001922|GO:…		Mm.3879	15251	25.7336	304.658	4.24983	7.24318	26.4115	25.496	25.2935	305.419	301.876	306.679	4.2818	4.20164	4.26604	7.26256	7.23063	7.23635
A_51_P125183	3.65542e-08	9.36428e-07	2.453	up	NM_026504	chr5:115746206-115746265	Coq5	Mus musculus coenzyme Q5 homolog, methyltransferase (yeast) (Coq5), mRNA [NM_026504]	GO:0005739|GO:0008150|GO:0006744|GO:0008168|GO:0032259|GO:0016740	NM_026504	Mm.290142	52064	167.17	780.684	7.2878	8.58234	169.274	165.59	166.647	760.816	782.766	798.468	7.28906	7.28475	7.28958	8.562	8.58384	8.60119
A_55_P1970867	3.66541e-08	9.37435e-07	3.08785	up	NR_033602	chr10:74815244-74815303	Gm5779	Mus musculus predicted gene 5779 (Gm5779), non-coding RNA [NR_033602]		NR_033602	Mm.491070	544707	11325.1	50278.6	13.7639	15.3905	11509.1	10976.8	11489.3	51096.3	49830.3	49909.3	13.7592	13.7423	13.7903	15.3853	15.3906	15.3956
A_52_P403020	3.68757e-08	9.38466e-07	2.0898	up	NM_011916	chr9:95946013-95946072	Xrn1	Mus musculus 5'-3' exoribonuclease 1 (Xrn1), mRNA [NM_011916]	GO:0016075|GO:0006396|GO:0008409|GO:0005794|GO:0090305|GO:0005886|GO:0071028|GO:0007569|GO:0003723|GO:0000956|GO:0003676|GO:0003677|GO:0004534|GO:0005622|GO:0004518|GO:0004527|GO:0005737|GO:0007126|GO:0016787|GO:0000723|GO:0000932|GO:0071044|GO:0045111	NM_011916	Mm.291179	24127	261.883	1063.37	7.9785	9.04186	267.902	256.341	261.407	1043.79	1062.61	1083.72	7.98977	7.96792	7.9778	9.0313	9.03923	9.05506
A_55_P1965050	3.77786e-08	9.47344e-07	2.89685	up	NM_025415	chr13:51745799-51745858	Cks2	Mus musculus CDC28 protein kinase regulatory subunit 2 (Cks2), mRNA [NM_025415]	GO:0016310|GO:0007127|GO:0007049|GO:0016301|GO:0016538|GO:0016740|GO:0051301	NM_025415	Mm.222228	66197	745.878	4181.69	9.63004	11.1645	754.833	742.012	740.79	4129.13	4137.87	4278.08	9.62426	9.64488	9.621	11.1601	11.1473	11.1862
A_51_P201338	3.81411e-08	9.54981e-07	2.28492	up	NM_144800	chr15:58774968-58774909	Mtss1	Mus musculus metastasis suppressor 1 (Mtss1), transcript variant 1, mRNA [NM_144800]	GO:0072160|GO:0017124|GO:0030036|GO:0072102|GO:0050680|GO:0005102|GO:0003779|GO:0015629|GO:0071498|GO:0042802|GO:0007399|GO:0061333|GO:0003785|GO:0007165|GO:0005737|GO:0007517|GO:2001013|GO:0030041|GO:0046847|GO:0007015|GO:0005856|GO:0008093	NM_144800	Mm.215481	211401	401.82	1818.26	8.6569	9.84905	412.994	392.801	399.665	1789.14	1823.98	1841.67	8.67751	8.64337	8.64982	9.84525	9.85143	9.85047
A_51_P199899	3.83409e-08	9.56567e-07	2.01514	up	NM_011936	chr8:94191851-94191910	Fto	Mus musculus fat mass and obesity associated (Fto), mRNA [NM_011936]	GO:0001659|GO:0070989|GO:0043734|GO:0051213|GO:0005634|GO:0042245|GO:0010883|GO:0035515|GO:0046872|GO:0006974|GO:0008198|GO:0035553|GO:0035516|GO:0035552|GO:0006281|GO:0006307|GO:0040014|GO:0080111|GO:0016491|GO:0070350|GO:0044065|GO:0060612|GO:0055114	NM_011936	Mm.4375	26383	205.511	803.405	7.61253	8.62341	210.507	201.103	204.924	789.653	810.878	809.683	7.62628	7.60203	7.60927	8.61646	8.63423	8.61954
A_55_P2013158	3.92962e-08	9.73296e-07	4.34278	up	NM_178688	chr19:57111731-57111672	Ablim1	Mus musculus actin-binding LIM protein 1 (Ablim1), transcript variant 1, mRNA [NM_178688]	GO:0005515|GO:0005737|GO:0007411|GO:0045944|GO:0007010|GO:0008270|GO:0003779|GO:0015629|GO:0005856|GO:0046872	NM_178688	Mm.217161	226251	68.737	509.904	5.84541	7.96403	69.4263	67.4789	69.3058	497.151	516.951	515.611	5.84772	5.81468	5.87381	7.94879	7.9778	7.96549
A_55_P2157195	3.98827e-08	9.78116e-07	3.41385	up		chr10:042582281-042582222		NM_117965 CLE2 (CLAVATA3/ESR-RELATED); receptor binding {Arabidopsis thaliana} (exp=-1; wgp=0; cg=0), partial (25%) [TC1776660]					337.466	2202.95	8.37571	10.1471	348.683	327.782	335.932	2191.01	2193.76	2224.08	8.40393	8.35248	8.37072	10.1572	10.1387	10.1454
A_55_P2025586	3.99332e-08	9.78116e-07	2.87563	up	EU835942	chr12:115560644-115560585		Mus musculus clone MAb502 immunoglobulin heavy chain variable region mRNA, partial cds. [EU835942]			Mm.303767		236.596	1292.63	7.82331	9.34719	238.601	230.423	240.764	1282.96	1287.17	1307.75	7.81406	7.80661	7.84925	9.35238	9.33914	9.35004
A_51_P116007	4.03574e-08	9.80123e-07	2.63378	up	NM_008229	chr10:36713455-36713589	Hdac2	Mus musculus histone deacetylase 2 (Hdac2), mRNA [NM_008229]	GO:0000792|GO:0005515|GO:0060044|GO:0000790|GO:0003700|GO:0005657|GO:0032129|GO:0016581|GO:0016580|GO:0017053|GO:0031072|GO:0000785|GO:0001103|GO:0001047|GO:2001243|GO:0000122|GO:0090311|GO:0016358|GO:0031490|GO:0033558|GO:0031078|GO:0000118|GO:0010977|GO:0055013|GO:0061198|GO:0019899|GO:0034739|GO:0045892|GO:0042733|GO:0008134|GO:0006344|GO:0008284|GO:0046970|GO:0005634|GO:0010870|GO:0051896|GO:…	NM_008229	Mm.19806	15182	256.418	1288.69	7.94497	9.3421	260.018	254.824	254.412	1291.66	1280.21	1294.19	7.93976	7.95847	7.93668	9.36341	9.3306	9.3323
A_55_P1967119	4.04035e-08	9.80123e-07	2.53806	up	NM_024468	chr17:36400734-36400675	Trim39	Mus musculus tripartite motif-containing 39 (Trim39), transcript variant 1, mRNA [NM_024468]	GO:0005739|GO:0005622|GO:0005737|GO:0016874|GO:0006915|GO:0008270|GO:0046872|GO:0042802	NM_024468	Mm.40624	79263	37.5643	142.516	4.85583	6.19956	37.7537	38.1501	36.7891	138.513	142.76	146.275	4.85489	4.8634	4.84921	6.17968	6.19964	6.21936
A_55_P2068506	4.05766e-08	9.82191e-07	3.32305	up	M16119	chr14:54363320-54363379		T cell receptor alpha variable 16 [Source:MGI Symbol;Acc:MGI:3702130] [ENSMUST00000103667]			Mm.213248		93.6464	556.729	6.35643	8.08894	95.4796	92.603	92.8566	537.807	564.701	567.679	6.36623	6.35401	6.34906	8.05927	8.10538	8.10216
A_51_P338728	4.0651e-08	9.82191e-07	3.59261	up	NM_001033140	chr7:31106653-31106594	Sdhaf1	Mus musculus succinate dehydrogenase complex assembly factor 1 (Sdhaf1), mRNA [NM_001033140]	GO:0034553|GO:0005739|GO:0003674	NM_001033140	Mm.6844	68332	1685.96	11476.4	10.9068	12.7519	1708.76	1681.51	1667.61	11288.5	11541.3	11599.3	10.8974	10.9331	10.8901	12.7315	12.7628	12.7613
A_55_P1981929	4.07112e-08	9.82191e-07	2.53094	up	NM_009162	chr2:113616840-113616781	Scg5	Mus musculus secretogranin V (Scg5), mRNA [NM_009162]	GO:0005622|GO:0004857|GO:0016486|GO:0007218|GO:0046883|GO:0006810|GO:0005623|GO:0005576|GO:0030141|GO:0043086|GO:0006886	NM_009162	Mm.4836	20394	1735.98	8587.05	10.9562	12.2958	1764.75	1690.11	1753.07	8596.17	8587.94	8577.03	10.9532	10.9395	10.9758	12.3052	12.2975	12.2848
A_66_P129795	4.07669e-08	9.82191e-07	2.77	up	NM_025602	chr10:105282445-105282504	Ccdc59	Mus musculus coiled-coil domain containing 59 (Ccdc59), mRNA [NM_025602]	GO:0008150|GO:0003674|GO:0006355|GO:0005634|GO:0005575|GO:0006351	NM_025602	Mm.339224	52713	895.547	4910.83	9.93384	11.4037	904.708	888.558	893.374	4927.26	4845.24	4959.99	9.92256	9.95157	9.9274	11.4197	11.3857	11.4058
A_55_P2410304	4.08839e-08	9.82191e-07	4.78896	up	NM_001146275	chr18:60551352-60551411	Iigp1	Mus musculus interferon inducible GTPase 1 (Iigp1), transcript variant 2, mRNA [NM_001146275]	GO:0005794|GO:0016817|GO:0035458|GO:0005783|GO:0020005|GO:0019221|GO:0003924|GO:0042832|GO:0005634|GO:0005525|GO:0042802|GO:0006184|GO:0050829|GO:0005737|GO:0000166|GO:0016020|GO:0016787|GO:0045087|GO:0005789|GO:0010506|GO:0019003	NM_001146275	Mm.261140	60440	664.551	5965.14	9.44102	11.7007	665.659	665.307	662.687	5991.93	5895.61	6007.87	9.41073	9.46769	9.44463	11.7226	11.6805	11.6991
A_55_P2036813	4.09836e-08	9.82191e-07	3.59271	up	NM_030082	chr11:58762964-58763023	Hist3h2ba	Mus musculus histone cluster 3, H2ba (Hist3h2ba), mRNA [NM_030082]	GO:0008150|GO:0046982|GO:0005694|GO:0006334|GO:0005634|GO:0005575|GO:0000786|GO:0003677	NM_030082	Mm.28022	78303	174.847	1186.18	7.36128	9.20636	179.959	173.298	171.284	1178.74	1184.92	1194.89	7.3867	7.36638	7.33076	9.2121	9.19927	9.2077
A_55_P2072391	4.10287e-08	9.82191e-07	2.27901	up	NM_001110239	chr12:31578196-31578191	Acp1	Mus musculus acid phosphatase 1, soluble (Acp1), transcript variant 1, mRNA [NM_001110239]	GO:0043005|GO:0017124|GO:0003993|GO:0005634|GO:0035335|GO:0016791|GO:0005737|GO:0006470|GO:0016787|GO:0016311|GO:0009898|GO:0004721|GO:0004725|GO:0004726	NM_001110239	Mm.359831	11431	72.5554	279.359	5.93644	7.12484	73.008	72.7847	71.8735	274.141	283.089	280.847	5.92535	5.94998	5.93398	7.11592	7.1409	7.11771
A_51_P345196	4.11387e-08	9.82337e-07	2.5072	up	NM_026116	chr8:96600950-96600891	Bbs2	Mus musculus Bardet-Biedl syndrome 2 (human) (Bbs2), mRNA [NM_026116]	GO:0038108|GO:0021987|GO:0005886|GO:0051216|GO:0043001|GO:0007288|GO:0042995|GO:0045494|GO:0036064|GO:0005737|GO:0008104|GO:0040015|GO:0042311|GO:0030534|GO:0005932|GO:0040018|GO:0005856|GO:0014824|GO:0001103|GO:0034464|GO:0033365|GO:0031514|GO:0044321|GO:0035058|GO:0048854|GO:0060296|GO:0042384|GO:0021766|GO:0021756|GO:0005929|GO:0016020|GO:0060271|GO:0010629|GO:0033210	NM_026116	Mm.292107	67378	132.146	618.553	6.92058	8.24666	132.714	130.768	132.956	606.45	626.359	622.851	6.90903	6.91258	6.94014	8.23919	8.26064	8.24015
A_51_P484254	4.17967e-08	9.88827e-07	3.31176	up	NM_144844	chr14:123212448-123276023	Pcca	Mus musculus propionyl-Coenzyme A carboxylase, alpha polypeptide (Pcca), mRNA [NM_144844]	GO:0005739|GO:0000166|GO:0016874|GO:0008152|GO:0004658|GO:0004075|GO:0019899|GO:0003824|GO:0005524|GO:0046872	NM_144844	Mm.23876	110821	146.866	910.346	7.08735	8.81495	146.852	147.063	146.684	912.42	911.512	907.107	7.06867	7.10349	7.0899	8.83479	8.81704	8.79302
A_66_P107484	4.19324e-08	9.89308e-07	2.79339	up	X02785	chr6:41066375-41066434	Trbv13-1	Mouse mRNA fragment for T-cell receptor beta-chain V(TB23). [X02785]			Mm.442501	100124673	498.725	2720.27	8.99606	10.4781	512.238	486.128	497.81	2710.64	2732.01	2718.16	9.0129	8.98182	8.99345	10.4939	10.481	10.4593
A_52_P399934	4.20051e-08	9.89308e-07	2.92429	up	NM_010090	chr2:127163930-127163989	Dusp2	Mus musculus dual specificity phosphatase 2 (Dusp2), mRNA [NM_010090]	GO:0005515|GO:0001706|GO:0042981|GO:0005634|GO:0000188|GO:0016791|GO:0006470|GO:0016787|GO:0016311|GO:0004721|GO:0005654|GO:0008138|GO:0004725|GO:0017017|GO:0051019	NM_010090	Mm.4729	13537	5817.04	28984.6	12.7357	14.2837	5891.06	5792.74	5767.32	29450.3	28912.2	28591.2	12.7234	12.7553	12.7283	14.297	14.2904	14.2639
A_55_P1979178	4.21571e-08	9.90668e-07	2.41153	up		chr1:029541754-029541695							9171.7	35512.6	13.4161	14.6861	9410.01	8967.88	9137.22	35602.2	35274.7	35661.1	13.428	13.4065	13.4138	14.6721	14.6813	14.7049
A_66_P131994	4.23794e-08	9.93671e-07	4.50298	up	NM_175252	chr13:62619708-62619649	Zfp934	Mus musculus zinc finger protein 934 (Zfp934), transcript variant 2, mRNA [NM_175252]	GO:0008150|GO:0003674|GO:0005575|GO:0046872	NM_175252	Mm.470091	77117	19.6936	119.59	3.8026	5.97348	20.1793	20.0507	18.8508	117.681	117.652	123.438	3.82607	3.79762	3.7841	5.97917	5.94408	5.99719
A_51_P118168	4.39091e-08	1.01707e-06	2.13516	up	NM_027947	chr2:33309244-33309185	Zbtb43	Mus musculus zinc finger and BTB domain containing 43 (Zbtb43), transcript variant 1, mRNA [NM_027947]	GO:0008150|GO:0006355|GO:0005634|GO:0003676|GO:0003677|GO:0046872|GO:0006351	NM_027947	Mm.44186	71834	294.954	1223.39	8.16184	9.25619	298.905	295.243	290.714	1215.02	1224.57	1230.57	8.1605	8.17951	8.14552	9.26093	9.25438	9.25324
A_52_P244702	4.42667e-08	1.01995e-06	2.2399	up	NM_009331	chr11:52066173-52066114	Tcf7	Mus musculus transcription factor 7, T cell specific (Tcf7), mRNA [NM_009331]	GO:0005667|GO:0006355|GO:0003700|GO:0044212|GO:0006357|GO:0008013|GO:0033153|GO:0046632|GO:0048699|GO:0044336|GO:0005634|GO:0003677|GO:0006351|GO:0043565|GO:0048557|GO:0007420|GO:0048619|GO:0042127|GO:0003682|GO:0030538|GO:0021915|GO:0071353|GO:0016055	NM_009331	Mm.31630	21414	15885	50802.8	14.252	15.4154	16224.7	15518.3	15912	52207.6	49903.3	50297.4	14.2559	14.2413	14.2588	15.4305	15.3984	15.4174
A_66_P126686	4.43799e-08	1.02033e-06	2.5687	up		chr9:115347440-115347381							20250.2	69088.6	14.7129	16.0739	20598.7	19764.2	20387.8	70654.4	68315.3	68296.1	14.694	14.7098	14.7348	16.0657	16.0761	16.08
A_55_P1954361	4.44704e-08	1.02033e-06	3.57194	up		chr12:115000519-115000460							110.247	717.56	6.62652	8.46323	112.042	109.769	108.931	723.867	705.879	722.934	6.63023	6.62608	6.62325	8.49534	8.4379	8.45645
A_55_P2140726	4.45317e-08	1.02033e-06	2.17743	up	NM_027241	chr3:96382497-96382438	Polr3gl	Mus musculus polymerase (RNA) III (DNA directed) polypeptide G like (Polr3gl), mRNA [NM_027241]	GO:0008150|GO:0003674|GO:0005575	NM_027241	Mm.292739	69870	192.834	811.756	7.51663	8.63926	194.374	191.967	192.161	806.691	816.712	811.866	7.50608	7.52904	7.51478	8.64902	8.64533	8.62342
A_52_P150651	4.45389e-08	1.02033e-06	2.98602	up	NM_001163126	chr12:32578921-32578980	Cog5	Mus musculus component of oligomeric golgi complex 5 (Cog5), mRNA [NM_001163126]	GO:0003674|GO:0005737|GO:0005794|GO:0016020|GO:0006810|GO:0017119|GO:0006891|GO:0005634|GO:0015031|GO:0048219	NM_001163126	Mm.173068	238123	69.3693	351.042	5.86269	7.44092	69.3203	69.6419	69.1457	351.463	353.22	348.442	5.84444	5.87416	5.86948	7.45926	7.44342	7.42008
A_55_P2035657	4.528e-08	1.03325e-06	2.44355	up	NM_008946	chr11:70341093-70341152	Psmb6	Mus musculus proteasome (prosome, macropain) subunit, beta type 6 (Psmb6), mRNA [NM_008946]	GO:0005839|GO:0005737|GO:0000502|GO:0016787|GO:0004175|GO:0051603|GO:0006508|GO:0008233|GO:0005634|GO:0004298	NM_008946	Mm.98	19175	8961.28	35218.8	13.3799	14.6689	9085.42	8902	8896.43	35466.8	34788.6	35401	13.3718	13.3916	13.3765	14.6627	14.6548	14.6893
A_55_P1982211	4.54514e-08	1.03349e-06	3.6219	up		chr16:019852599-019852540							246.729	1679.56	7.88449	9.74124	255.564	241.63	242.993	1636.1	1703.21	1699.36	7.91103	7.87664	7.86581	9.72193	9.75885	9.74295
A_55_P2087628	4.54701e-08	1.03349e-06	2.95249	up	XM_917927		LOC640793	PREDICTED: Mus musculus schlafen family member 13-like (LOC640793), mRNA [XM_917927]		XM_917927		640793	35.5135	155.712	4.76388	6.32581	35.2025	36.067	35.271	152.176	156.469	158.491	4.73808	4.76808	4.78547	6.31874	6.32433	6.33436
A_51_P398766	4.55978e-08	1.0337e-06	5.03136	up	NM_010259	chr3:142281897-142281956	Gbp2b	Mus musculus guanylate binding protein 2b (Gbp2b), mRNA [NM_010259]	GO:0005794|GO:0035458|GO:0050830|GO:0020005|GO:0003924|GO:0042832|GO:0005576|GO:0051856|GO:0031410|GO:0005525|GO:0051607|GO:0005737|GO:0071346|GO:0000166|GO:0016020|GO:0019002	NM_010259	Mm.457978	14468	1641.32	15312.7	10.8621	13.193	1676.94	1573.46	1673.56	15134.3	15378.9	15424.9	10.8702	10.8232	10.8928	13.1786	13.2021	13.1983
A_55_P2030771	4.56102e-08	1.0337e-06	5.32813	up	NM_019406	chr2:30914483-30914424	Fnbp1	Mus musculus formin binding protein 1 (Fnbp1), transcript variant 2, mRNA [NM_019406]	GO:0005515|GO:0005886|GO:0005575|GO:0031410|GO:0005764|GO:0006897|GO:0007399|GO:0008289|GO:0042802|GO:0005737|GO:0005905|GO:0016020|GO:0005856	NM_019406	Mm.52297	14269	31.8459	255.109	4.58703	7.00066	32.5446	31.3614	31.6319	249.682	256.042	259.602	4.612	4.54317	4.60592	6.99095	7.00417	7.00685
A_52_P1158254	4.56683e-08	1.0339e-06	4.33547	up	AJ249821	chr6:41128898-41128957		Mus musculus TRBV gene for T-cell receptor beta chain, variable region, 282BP. [AJ249821]			Mm.347827		337.915	2750.53	8.38197	10.4982	341.545	331.989	340.21	2671.07	2797.95	2782.57	8.37414	8.37705	8.39471	10.4644	10.529	10.501
A_55_P1997485	4.57294e-08	1.03417e-06	2.83775	up		chr17:035091392-035091333							1052.95	5896.67	10.1785	11.6832	1088.38	1021.53	1048.95	5806.85	5901.47	5981.68	10.2031	10.1567	10.1756	11.6767	11.6824	11.6906
A_55_P1965605	4.60995e-08	1.03911e-06	4.19102	up	NM_027188	chr1:181353546-181353487	Smyd3	Mus musculus SET and MYND domain containing 3 (Smyd3), mRNA [NM_027188]	GO:0018022|GO:0005737|GO:0008168|GO:0034968|GO:0005634|GO:0005575|GO:0032259|GO:0046872|GO:0016740|GO:0018024|GO:0016568	NM_027188	Mm.222338	69726	66.5365	474.839	5.79088	7.85819	67.8355	66.6639	65.1103	479.911	471.608	472.999	5.80682	5.79208	5.77375	7.89155	7.84537	7.83763
A_52_P325161	4.63126e-08	1.04065e-06	3.76074	up	NM_177660	chr3:9284831-9284890	Zbtb10	Mus musculus zinc finger and BTB domain containing 10 (Zbtb10), mRNA [NM_177660]	GO:0005634|GO:0000122|GO:0003677|GO:0046872	NM_177660	Mm.103262	229055	107.791	734.053	6.586	8.49702	107.378	108.589	107.407	730.459	738.687	733.013	6.55651	6.61098	6.59052	8.50977	8.4998	8.48148
A_55_P1973347	4.80308e-08	1.06542e-06	4.12767	up	AK149472	chr19:4064579-4064520		Mus musculus adult male liver tumor cDNA, RIKEN full-length enriched library, clone:C730020H24 product:hypothetical protein, full insert sequence. [AK149472]			Mm.290617		8110.23	48180.2	13.2444	15.2897	8395.66	7839.32	8095.71	49159.9	47127.8	48253	13.2677	13.2185	13.2469	15.2909	15.2665	15.3117
A_52_P141161	4.81453e-08	1.06542e-06	3.4752	up	NM_133834	chr6:117873933-117873992	Hnrnpf	Mus musculus heterogeneous nuclear ribonucleoprotein F (Hnrnpf), transcript variant 1, mRNA [NM_133834]	GO:0006397|GO:0008380|GO:0003727|GO:0003723|GO:0005634|GO:0003676|GO:0071013|GO:0005737|GO:0000166|GO:0030529|GO:0017025|GO:0005681|GO:0043484	NM_133834	Mm.422979	98758	1112.77	7440.83	10.2684	12.0655	1133.54	1083.94	1120.83	7507.46	7397.17	7417.85	10.2706	10.2508	10.2837	12.0925	12.0587	12.0452
A_55_P1964658	4.82256e-08	1.06542e-06	2.27485	up		chr5:148994534-148994475							1031.18	4649.3	10.1441	11.3299	1061.84	1001.98	1029.73	4592.95	4671.22	4683.72	10.1631	10.1251	10.1442	11.3288	11.3346	11.3263
A_55_P2008879	4.83856e-08	1.06683e-06	3.08474	up	NM_001003908	chr11:86510827-86510768	Cltc	Mus musculus clathrin, heavy polypeptide (Hc) (Cltc), mRNA [NM_001003908]	GO:0003725|GO:0030132|GO:0031523|GO:0030136|GO:0006886|GO:0030117|GO:0030118|GO:0005739|GO:0031623|GO:0033572|GO:0031072|GO:0007030|GO:0090307|GO:0016192|GO:0070062|GO:0042277|GO:0005819|GO:0030506|GO:0030315|GO:0031410|GO:0008022|GO:0006898|GO:0042383|GO:0043234|GO:0007067|GO:0005905|GO:0016020|GO:0005198|GO:0030130	NM_001003908	Mm.254588	67300	819.883	4926.73	9.78249	11.4076	827.353	824.693	807.601	4869.32	4929.25	4981.62	9.77349	9.81215	9.76183	11.405	11.4054	11.4125
A_52_P157240	4.83908e-08	1.06683e-06	3.5903	up	NM_009702	chr2:113942307-113940377	Aqr	Mus musculus aquarius (Aqr), mRNA [NM_009702]	GO:0008380|GO:0006397|GO:0008150|GO:0003674|GO:0000398|GO:0003723|GO:0005681|GO:0005634|GO:0097157|GO:0071013	NM_009702	Mm.2545	11834	266.582	1821.51	8.00683	9.85094	275.394	261.863	262.488	1823.31	1808.22	1832.99	8.0328	8.00217	7.98553	9.87203	9.83755	9.84323
A_55_P2008747	4.86571e-08	1.07021e-06	3.49205	up	NM_026095	chr10:74994982-74995041	Snrpd3	Mus musculus small nuclear ribonucleoprotein D3 (Snrpd3), mRNA [NM_026095]	GO:0006397|GO:0008380|GO:0003723|GO:0005634|GO:0071013|GO:0005737|GO:0019013|GO:0030529|GO:0005683|GO:0005681|GO:0019899|GO:0019012|GO:0005689|GO:0071208	NM_026095	Mm.45151	67332	1734.84	11527.1	10.9544	12.7584	1785.23	1711.5	1707.79	11397.9	11661.3	11522.1	10.9763	10.957	10.9297	12.7472	12.7795	12.7487
A_55_P2164492	4.87746e-08	1.0708e-06	5.02101	up	AK152815	chr2:156945953-156945894	Samhd1	SAM domain and HD domain, 1 [Source:MGI Symbol;Acc:MGI:1927468] [ENSMUST00000149313]	GO:0051607|GO:0008081|GO:0016787|GO:0045087|GO:0003723|GO:0045088|GO:0005634|GO:0003824|GO:0003676|GO:0046872		Mm.248478	56045	471.02	4378.87	8.90895	11.2369	483.765	470.639	458.657	4384.81	4375.7	4376.11	8.92669	8.93168	8.86849	11.2531	11.2349	11.2228
A_55_P2070262	4.91731e-08	1.07394e-06	4.46261	up	AK155210	chr9:108553135-108553194		predicted gene 10621 [Source:MGI Symbol;Acc:MGI:3642291] [ENSMUST00000098384]			Mm.290447		40.3553	279.602	4.96894	7.12683	40.3523	41.7493	38.9642	277.048	278.648	283.111	4.95745	5.00871	4.94067	7.12853	7.12344	7.12853
A_52_P443776	4.92778e-08	1.074e-06	2.9162	up	AB734727	chr12:116550552-116550493		Mus musculus IgVH mRNA for immunoglobulin heavy chain, partial cds, clone: VIM14. [AB734727]			Mm.342188		66.9957	327.977	5.80187	7.34596	68.6042	66.5155	65.8675	327.973	327.341	328.616	5.82538	5.78741	5.79282	7.36318	7.33942	7.33529
A_55_P2008244	4.93854e-08	1.07523e-06	2.76138	up		chr19:011513253-011513312							1471.25	7926.14	10.7042	12.1695	1476.14	1456.92	1480.7	7805.12	7964.61	8008.71	10.6831	10.7095	10.72	12.1525	12.1803	12.1758
A_52_P184629	4.98147e-08	1.08122e-06	2.51321	up	M31648	chr6:41085544-41085603		Mouse T-cell receptor rearranged beta-chain mRNA V-J-C region, 3' end. [M31648]			Mm.345390		222.713	1078.23	7.73287	9.0624	228.877	217.185	222.077	1071.11	1072.05	1091.53	7.75441	7.71456	7.72964	9.07055	9.05297	9.06367
A_55_P2071846	5.01232e-08	1.08344e-06	2.71593	up		chr10:025552875-025552816							4152.86	20933.6	12.2686	13.71	4237.06	4062.33	4159.19	20651.6	20882	21267.2	12.2694	12.2623	12.274	13.6851	13.7141	13.7309
A_51_P511236	5.08938e-08	1.09672e-06	3.62935	up	NM_001077495	chr13:102454465-102454406	Pik3r1	Mus musculus phosphatidylinositol 3-kinase, regulatory subunit, polypeptide 1 (p85 alpha) (Pik3r1), transcript variant 2, mRNA [NM_001077495]	GO:0051219|GO:0005515|GO:0005516|GO:0005159|GO:0005158|GO:0043560|GO:0051591|GO:0005622|GO:0034644|GO:0043551|GO:0016301|GO:0016303|GO:0051117|GO:0043559|GO:0031625|GO:0043125|GO:0010459|GO:0032868|GO:0022408|GO:0030335|GO:0019901|GO:0032760|GO:0005168|GO:0036092|GO:0019903|GO:0019904|GO:0030331|GO:0051384|GO:0005161|GO:0014065|GO:0043234|GO:0016310|GO:0046935|GO:0010656|GO:0043548|GO:0001953|GO:…	NM_001077495	Mm.259333	18708	920.396	6497.12	9.97665	11.8364	926.557	921.815	912.815	6361.2	6539.28	6590.89	9.96029	10.004	9.96564	11.8137	11.849	11.8463
A_55_P2026214	5.147e-08	1.10574e-06	3.03577	up		chr7:101345912-101345971							1369.9	8023.33	10.5898	12.1918	1383.05	1339.34	1387.3	7941.55	8091.55	8036.9	10.5778	10.5769	10.6146	12.1818	12.21	12.1837
A_55_P2016462	5.16974e-08	1.10949e-06	7.12451	up	NM_021274	chr5:92775840-92775781	Cxcl10	Mus musculus chemokine (C-X-C motif) ligand 10 (Cxcl10), mRNA [NM_021274]	GO:0008009|GO:0008284|GO:0030335|GO:0009306|GO:0005623|GO:0005576|GO:0005125|GO:0005615|GO:0002690|GO:0007165|GO:0051607|GO:0006955|GO:0006954|GO:0006935|GO:0016525|GO:0009897	NM_021274	Mm.877	15945	238.591	3068.97	7.83538	10.6682	237.633	235.748	242.392	2939.29	3147.29	3120.32	7.80661	7.84002	7.8595	10.6251	10.7011	10.6783
A_55_P2076085	5.18597e-08	1.11071e-06	2.53661	up	NM_001254951	chr7:28769975-28769916	Zfp850	Mus musculus zinc finger protein 850 (Zfp850), mRNA [NM_001254951]	GO:0008150|GO:0003674|GO:0005575|GO:0046872	NM_001254951	Mm.129275	100043772	52.5799	211.171	5.39782	6.74072	53.7893	52.3764	51.574	208.671	210.084	214.757	5.42042	5.38555	5.38749	6.74762	6.72814	6.74639
A_51_P389531	5.23875e-08	1.1152e-06	2.23855	up	NM_019830	chr7:52234151-52234092	Prmt1	Mus musculus protein arginine N-methyltransferase 1 (Prmt1), transcript variant 1, mRNA [NM_019830]	GO:0005515|GO:0019919|GO:0008168|GO:0005634|GO:0008469|GO:0032259|GO:0031175|GO:0005829|GO:0042054|GO:0042802|GO:0045653|GO:0005737|GO:0030519|GO:0006479|GO:0016571|GO:0016274|GO:0035241|GO:0016275|GO:0018216|GO:0035247|GO:0035246|GO:0008170|GO:0001701|GO:0035242|GO:0043234|GO:0044020|GO:0043985|GO:0008276|GO:0016740	NM_019830	Mm.27545	15469	479.841	2139.59	8.93638	10.0989	481.348	478.44	479.734	2118.59	2145.15	2155.02	8.9187	8.95659	8.93384	10.101	10.1014	10.0944
A_55_P2133195	5.37845e-08	1.13007e-06	6.40711	up	NM_001033767	chr18:60407406-60407465	Gm4951	Mus musculus predicted gene 4951 (Gm4951), mRNA [NM_001033767]	GO:0003674|GO:0035458|GO:0005575	NM_001033767	Mm.357104	240327	885.701	10359.5	9.91034	12.59	905.739	848.991	902.374	10169	10332	10577.5	9.92379	9.8631	9.94412	12.5784	12.5831	12.6085
A_51_P407193	5.41421e-08	1.13418e-06	2.38664	up	NM_133840	chr2:84564117-84564058	Clp1	Mus musculus CLP1, cleavage and polyadenylation factor I subunit (Clp1), mRNA [NM_133840]	GO:0006388|GO:0006397|GO:0030423|GO:0005634|GO:0000214|GO:0005524|GO:0008033|GO:0035087|GO:0016310|GO:0046404|GO:0000166|GO:0016301|GO:0051736|GO:0051733|GO:0016740	NM_133840	Mm.21583	98985	404.386	1902.9	8.6666	9.92158	410.528	398.66	403.971	1905.42	1901.72	1901.56	8.66526	8.66482	8.66973	9.94366	9.91926	9.90183
A_55_P1996816	5.43726e-08	1.13421e-06	2.53487	up		chr3:149736392-149736333							14064.7	51009.3	14.0838	15.4257	14285.2	13979.8	13929	52522.4	50138.8	50366.8	14.0789	14.0957	14.0768	15.4481	15.409	15.4201
A_55_P1957213	5.44586e-08	1.13421e-06	4.13564	up	AK019465	chr13:55287219-55287278	3930401B19Rik	Mus musculus 13 days embryo whole body cDNA, RIKEN full-length enriched library, clone:3930401B19 product:Y box protein 3, full insert sequence. [AK019465]			Mm.290617	77570	14952.6	73993.4	14.1723	16.2204	15482.1	14497.4	14878.4	74813.5	73909.1	73257.7	14.194	14.1563	14.1665	16.1874	16.2378	16.236
A_55_P2162651	5.45056e-08	1.13421e-06	2.05397	up		chr19:016100008-016100067							19245.4	56787.7	14.6144	15.6528	19688.1	18694.7	19353.3	57501.4	56409.7	56452.2	14.6187	14.5984	14.626	15.6415	15.6555	15.6613
A_65_P02543	5.46319e-08	1.13446e-06	2.15353	up	NM_025691	chr5:77427425-77427483	Srp72	Mus musculus signal recognition particle 72 (Srp72), mRNA [NM_025691]	GO:0005786|GO:0005737|GO:0005886|GO:0005783|GO:0042493|GO:0030529|GO:0006614|GO:0005730|GO:0005047	NM_025691	Mm.296976	66661	772.873	3333.27	9.68499	10.7917	792.575	756.057	769.988	3287.16	3364.41	3348.25	9.70148	9.67529	9.67821	10.7857	10.8055	10.7839
A_55_P1965851	5.48521e-08	1.13509e-06	2.29012	up	NM_152810	chr17:45544865-45544806	Cdc5l	Mus musculus cell division cycle 5-like (S. pombe) (Cdc5l), mRNA [NM_152810]	GO:0000974|GO:0006397|GO:0008380|GO:0006355|GO:0003723|GO:0019904|GO:0005634|GO:0071013|GO:0003677|GO:0006351|GO:0005737|GO:0007049|GO:0016607|GO:0071987|GO:0000398|GO:0003682|GO:0005681	NM_152810	Mm.28270	71702	333.485	1475.08	8.35864	9.55407	336.377	327.686	336.392	1466.74	1482.4	1476.1	8.35016	8.35163	8.37414	9.56402	9.56154	9.53664
A_55_P2141876	5.48872e-08	1.13509e-06	2.4773	up	NM_001136069	chr7:54103010-54103069	Ldha	Mus musculus lactate dehydrogenase A (Ldha), transcript variant 2, mRNA [NM_001136069]	GO:0005515|GO:0006089|GO:0044262|GO:0043065|GO:0005975|GO:0019674|GO:0003824|GO:0006096|GO:0042802|GO:0005829|GO:0016616|GO:0005739|GO:0004457|GO:0005929|GO:0005737|GO:0051287|GO:0004459|GO:0031668|GO:0016491|GO:0019900|GO:0055114	NM_001136069	Mm.29324	16828	535.13	2637.3	9.11157	10.4203	547.168	520.734	537.487	2595.07	2661.42	2655.41	9.12063	9.09301	9.12109	10.4097	10.4378	10.4135
A_66_P139683	5.56455e-08	1.14594e-06	3.92937	up	NM_021394	chr2:173032317-173032258	Zbp1	Mus musculus Z-DNA binding protein 1 (Zbp1), transcript variant 1, mRNA [NM_021394]	GO:0005515|GO:0003692|GO:0051607|GO:0005737|GO:0003726|GO:0045087|GO:0019048|GO:0003723|GO:0060340|GO:0005634|GO:0003677|GO:0005829	NM_021394	Mm.116687	58203	396.461	2947.74	8.63541	10.6097	403.974	382.119	403.291	2897.98	2950.7	2994.53	8.63948	8.60119	8.66558	10.6015	10.6087	10.619
A_55_P2142934	5.60121e-08	1.14819e-06	4.89146	up	DQ186679	chr14:54241732-54241790		T cell receptor alpha variable 12-3 [Source:MGI Symbol;Acc:MGI:3648633] [ENSMUST00000103657]			Mm.471605		119.371	1067.55	6.75829	9.04855	118.362	119.403	120.35	1047.14	1078.47	1077.05	6.72032	6.76206	6.79248	9.03552	9.06407	9.04606
A_52_P81630	5.63449e-08	1.15226e-06	2.18214	up	NR_033780	chr11:63896228-63896287	2810001G20Rik	Mus musculus RIKEN cDNA 2810001G20 gene (2810001G20Rik), long non-coding RNA [NR_033780]	GO:0008150|GO:0003674|GO:0005575	NR_033780	Mm.124828	66456	229.178	964.948	7.77625	8.902	234.794	224.921	227.818	961.433	954.73	978.681	7.79059	7.77011	7.76807	8.91408	8.88576	8.90615
A_52_P617888	5.64252e-08	1.15226e-06	3.75668	up	AK045785	chr5:116017016-116017075		Mus musculus adult male corpora quadrigemina cDNA, RIKEN full-length enriched library, clone:B230311A22 product:hypothetical protein, full insert sequence. [AK045785]			Mm.153014		135.593	946.152	6.96212	8.87158	139.322	132.142	135.315	935.226	938.001	965.229	6.98913	6.93041	6.96682	8.86798	8.86023	8.88652
A_55_P2059323	5.66076e-08	1.15371e-06	2.57186	up	NR_028497	chr2:14643230-14643289	Gm13315	Mus musculus predicted gene 13315 (Gm13315), non-coding RNA [NR_028497]		NR_028497	Mm.484784	625342	586.016	2944.61	9.24563	10.6084	589.699	582.295	586.054	2900.16	2979.44	2954.22	9.22644	9.26318	9.24727	10.6025	10.6247	10.5982
A_52_P358406	5.66105e-08	1.15371e-06	2.58985	up	U55531	chr12:116229549-116229490		Mus musculus anti-DNA immunoglobulin heavy chain IgM mRNA, antibody 452p.177m, partial cds. [U55531]			Mm.422810		197.966	983.445	7.55704	8.92991	203.676	195.58	194.643	965.549	984.729	1000.06	7.57504	7.56245	7.53363	8.92037	8.92914	8.94022
A_55_P2249556	5.67955e-08	1.15524e-06	3.16775	up	AK042310	chr1:80743869-80743810	A630081D01Rik	Mus musculus 3 days neonate thymus cDNA, RIKEN full-length enriched library, clone:A630081D01 product:unclassifiable, full insert sequence. [AK042310]			Mm.404411	98754	732.899	4448.9	9.59845	11.2619	748.915	729.431	720.352	4389.16	4503.63	4453.92	9.60706	9.61623	9.57204	11.2549	11.2805	11.2504
A_55_P2179599	5.73561e-08	1.16103e-06	2.76356	up	NM_029509	chr5:105444010-105443951	Gbp8	Mus musculus guanylate-binding protein 8 (Gbp8), mRNA [NM_029509]	GO:0003674|GO:0071346|GO:0005575	NM_029509	Mm.458519	76074	1008.09	5528.49	10.1115	11.578	1029.69	1004.44	990.149	5459.25	5581.23	5544.98	10.1182	10.1285	10.0878	11.5705	11.5936	11.5699
A_55_P2116802	5.88096e-08	1.17574e-06	2.92612	up		chr4:136164882-136164823							978.924	5660.85	10.0683	11.6173	998.286	975.448	963.038	5654.36	5612.82	5715.37	10.0739	10.0872	10.0438	11.6293	11.6009	11.6218
A_55_P2058628	5.8931e-08	1.17705e-06	4.30213	up	NM_198090	chr2:75500962-75501666	Hnrnpa3	Mus musculus heterogeneous nuclear ribonucleoprotein A3 (Hnrnpa3), transcript variant a, mRNA [NM_198090]	GO:0043005|GO:0005737|GO:0051033|GO:0005730|GO:0035770|GO:0005634|GO:0051028|GO:0071013|GO:0003729|GO:0055085	NM_198090	Mm.379375	229279	844.517	6870.02	9.82925	11.9343	872.115	818.588	842.85	6741.37	6869.96	6998.74	9.8614	9.80023	9.82614	11.9151	11.934	11.9538
A_55_P2339650	5.9101e-08	1.17933e-06	2.41544	up	NM_177301	chr7:29605608-29605667	Hnrnpl	Mus musculus heterogeneous nuclear ribonucleoprotein L (Hnrnpl), mRNA [NM_177301]	GO:0006397|GO:0005737|GO:0044212|GO:0000166|GO:0030529|GO:0003723|GO:0005634|GO:0045120|GO:0003676	NM_177301	Mm.9043	15388	1702.48	8038.56	10.9222	12.1945	1720.8	1695.56	1691.07	8029.28	7973.26	8113.15	10.9106	10.9443	10.9117	12.2027	12.1823	12.1985
A_55_P2140478	5.95533e-08	1.18165e-06	4.74747	up	AY029362	chr14:54377467-54377526		T cell receptor alpha variable 13-4-DV7 [Source:MGI Symbol;Acc:MGI:3702151] [ENSMUST00000180380]			Mm.213248		97.6127	829.775	6.425	8.67216	100.537	94.1302	98.1708	826.149	824.015	839.162	6.45086	6.38396	6.44018	8.68547	8.65627	8.67473
A_51_P420400	5.98881e-08	1.1838e-06	7.46727	up	NM_010703	chr3:130907851-130926012	Lef1	Mus musculus lymphoid enhancer binding factor 1 (Lef1), transcript variant 1, mRNA [NM_010703]	GO:0005515|GO:0003700|GO:0008013|GO:0006366|GO:0030111|GO:0030307|GO:0032714|GO:0003705|GO:0001756|GO:0032713|GO:0001755|GO:0030879|GO:0021861|GO:0032993|GO:0016055|GO:0043027|GO:0001944|GO:0021542|GO:0022407|GO:0022408|GO:0000977|GO:0022409|GO:0030335|GO:0033153|GO:0008301|GO:0021879|GO:0030331|GO:0000122|GO:0030509|GO:0021873|GO:0035326|GO:0001649|GO:0043392|GO:0008134|GO:0008284|GO:0010718|GO:…	NM_010703	Mm.255219	16842	541.137	7269.49	9.12429	12.0249	542.012	552.889	528.509	7210.39	7187.51	7410.56	9.10689	9.17776	9.08821	12.0234	12.0086	12.0426
A_52_P137371	5.99961e-08	1.18482e-06	2.90282	up	NM_008255	chr13:97420006-97419947	Hmgcr	Mus musculus 3-hydroxy-3-methylglutaryl-Coenzyme A reductase (Hmgcr), mRNA [NM_008255]	GO:0050661|GO:0006629|GO:0050662|GO:0006695|GO:0008284|GO:0006694|GO:0005783|GO:0032874|GO:0009790|GO:0015936|GO:0070402|GO:0042803|GO:0043231|GO:0061045|GO:0043407|GO:0045908|GO:0010666|GO:0070374|GO:0008202|GO:0005778|GO:0008203|GO:0010664|GO:0043066|GO:0051262|GO:0004420|GO:0008299|GO:0048661|GO:0048643|GO:0016616|GO:0006743|GO:0016020|GO:0008542|GO:0005789|GO:0016126|GO:0016491|GO:0016021|GO:…	NM_008255	Mm.316652	15357	304.469	1687.31	8.21074	9.74819	305.554	298.338	309.515	1648.31	1688	1725.63	8.19599	8.20089	8.23533	9.7325	9.74797	9.7641
A_51_P413866	6.02783e-08	1.18928e-06	2.105	up	NM_008198	chr17:34993858-34993502	Cfb	Mus musculus complement factor B (Cfb), transcript variant 1, mRNA [NM_008198]	GO:0006957|GO:0006956|GO:0016787|GO:0004252|GO:0008283|GO:0045087|GO:0006508|GO:0008236|GO:0008233|GO:0005576|GO:0003824|GO:0005615	NM_008198	Mm.653	14962	379.422	1561.38	8.56754	9.64136	386.591	369.106	382.569	1542.53	1554.85	1586.76	8.57299	8.54895	8.58068	9.63995	9.63363	9.65051
A_51_P272553	6.06431e-08	1.19201e-06	2.08444	up	NM_011498	chr6:108616309-108616368	Bhlhe40	Mus musculus basic helix-loop-helix family, member e40 (Bhlhe40), mRNA [NM_011498]	GO:0005515|GO:0001191|GO:0006366|GO:0003705|GO:0000981|GO:0005634|GO:0042803|GO:0043433|GO:0009649|GO:0046983|GO:0043153|GO:0001102|GO:0006355|GO:0005794|GO:0046982|GO:0019904|GO:0005730|GO:0043426|GO:0043425|GO:0070888|GO:0000122|GO:0003677|GO:0006351|GO:0032922|GO:0001078|GO:0045892	NM_011498	Mm.2436	20893	1954.23	8079.68	11.1443	12.204	1997.51	1904.8	1960.37	8057.52	8070.09	8111.43	11.1558	11.1245	11.1527	12.2089	12.2062	12.1969
A_52_P620793	6.08962e-08	1.19475e-06	2.16721	up	NM_001005509	chr3:58352658-58352717	Eif2a	Mus musculus eukaryotic translation initiation factor 2A (Eif2a), mRNA [NM_001005509]	GO:0005850|GO:0005737|GO:0032933|GO:0000049|GO:0042255|GO:0043022|GO:0003743|GO:0009967|GO:0006468|GO:0006412|GO:0006417|GO:0006413	NM_001005509	Mm.21617	229317	678.083	2899.55	9.47139	10.5872	689.477	670.954	673.819	2846.74	2949.34	2902.57	9.46986	9.47977	9.46454	10.5778	10.6078	10.5761
A_52_P255250	6.09617e-08	1.19492e-06	4.59687	up	NM_009543	chr6:71446956-71455778	Rnf103	Mus musculus ring finger protein 103 (Rnf103), mRNA [NM_009543]	GO:0004842|GO:0016567|GO:0016020|GO:0005783|GO:0016874|GO:0008270|GO:0016021|GO:0030433|GO:0046872	NM_009543	Mm.422969	22644	62.8435	486.399	5.6935	7.89415	64.2115	63.8208	60.4983	480.665	486.955	491.577	5.71155	5.71937	5.64959	7.89491	7.89207	7.89547
A_52_P16356	6.13065e-08	1.19721e-06	5.01435	up	AK013505	chr19:24552642-24552701		Mus musculus adult male hippocampus cDNA, RIKEN full-length enriched library, clone:2900009I07 product:hypothetical protein, full insert sequence. [AK013505]					99.6095	891.838	6.45726	8.78332	100.968	96.2717	101.589	876.058	896.023	903.434	6.45661	6.41787	6.49729	8.77411	8.78858	8.78727
A_55_P2007663	6.17232e-08	1.202e-06	2.13298	up	NM_026303	chr9:3385761-3385820	Alkbh8	Mus musculus alkB, alkylation repair homolog 8 (E. coli) (Alkbh8), mRNA [NM_026303]	GO:0003723|GO:0008168|GO:0030488|GO:0005634|GO:0003676|GO:0003824|GO:0032259|GO:0046872|GO:0006974|GO:0005829|GO:0005737|GO:0000166|GO:0016300|GO:0008152|GO:0015630|GO:0016706|GO:0016491|GO:0016740|GO:0055114	NM_026303	Mm.116968	67667	177.518	725.953	7.38816	8.48103	178.107	174.975	179.471	718.319	726.371	733.17	7.37113	7.38473	7.40863	8.48227	8.47899	8.48184
A_55_P2162136	6.18066e-08	1.2023e-06	3.19166	up	NM_016957	chr4:133521925-133521866	Hmgn2	Mus musculus high mobility group nucleosomal binding domain 2 (Hmgn2), mRNA [NM_016957]	GO:0003674|GO:0040034|GO:0006357|GO:0005634	NM_016957	Mm.319660	15331	2077.22	12796.9	11.2349	12.9092	2138.02	2068.03	2025.61	12785.4	12728.9	12876.3	11.2553	11.2478	11.2017	12.9129	12.9068	12.9079
A_51_P105161	6.19118e-08	1.20234e-06	2.76202	up	NM_028719	chr9:104936317-104936376	Cpne4	Mus musculus copine IV (Cpne4), mRNA [NM_028719]	GO:0005515|GO:0008150|GO:0005575	NM_028719	Mm.326240	74020	172.963	908.554	7.34563	8.81135	175.608	172.207	171.073	912.354	904.633	908.675	7.35293	7.35615	7.32781	8.83449	8.80337	8.79621
A_65_P17476	6.20357e-08	1.20252e-06	3.24759	up	NM_198671	chr8:123102559-123102618	Gse1	Mus musculus genetic suppressor element 1 (Gse1), transcript variant 1, mRNA [NM_198671]	GO:0008150|GO:0003674|GO:0005575	NM_198671	Mm.334856	382034	52.9136	275.772	5.40886	7.10823	53.6123	53.4019	51.7265	269.107	273.314	284.894	5.41549	5.42042	5.39067	7.09237	7.09523	7.1371
A_55_P1995045	6.24568e-08	1.20403e-06	2.84851	up	NM_028864	chr6:38266384-38266325	Zc3hav1	Mus musculus zinc finger CCCH type, antiviral 1 (Zc3hav1), transcript variant 2, mRNA [NM_028864]	GO:0032728|GO:0005794|GO:0005886|GO:0003723|GO:0032727|GO:1900246|GO:0005634|GO:0032781|GO:0009615|GO:0050691|GO:0046872|GO:0003950|GO:0071360|GO:0051607|GO:0005737|GO:0045087|GO:0017151|GO:0032481|GO:0061014|GO:0043123|GO:0045071	NM_028864	Mm.486484	78781	1156.89	6512.07	10.3283	11.8385	1193.23	1141.68	1135.75	6432.69	6481.53	6622	10.3467	10.3355	10.3027	11.8304	11.8314	11.8538
A_51_P108901	6.30162e-08	1.20801e-06	2.75811	up	NM_023731	chr19:11017568-11017509	Ccdc86	Mus musculus coiled-coil domain containing 86 (Ccdc86), mRNA [NM_023731]	GO:0005730|GO:0005634	NM_023731	Mm.294908	108673	521.903	2808.57	9.07068	10.5344	532.757	515.112	517.84	2811.97	2822.83	2790.91	9.07681	9.07713	9.05811	10.552	10.543	10.508
A_55_P2091201	6.30285e-08	1.20801e-06	3.47876	up	NM_001033422	chrX:39225551-39225492	Thoc2	Mus musculus THO complex 2 (Thoc2), mRNA [NM_001033422]	GO:0008380|GO:0006397|GO:0003674|GO:0000347|GO:0006406|GO:0003723|GO:0000346|GO:0006810|GO:0005634|GO:0000445|GO:0051028|GO:0046784	NM_001033422	Mm.259498	331401	88.7814	549.314	6.27159	8.07016	88.3418	89.324	88.6784	535.627	556.885	555.431	6.2421	6.29512	6.27753	8.05282	8.08518	8.07248
A_52_P207982	6.30467e-08	1.20801e-06	2.37431	up	NM_027901	chr5:31461462-31460838	Gtf3c2	Mus musculus general transcription factor IIIC, polypeptide 2, beta (Gtf3c2), mRNA [NM_027901]	GO:0000127|GO:0005634|GO:0006383|GO:0003677|GO:0006351	NM_027901	Mm.271923	71752	193.408	884.472	7.5221	8.7696	198.996	189.699	191.528	876.896	878.122	898.398	7.54284	7.51313	7.51032	8.77572	8.75532	8.77777
A_55_P1985895	6.32032e-08	1.20801e-06	2.38146	up	NM_145585	chr7:126858719-126858660	Thumpd1	Mus musculus THUMP domain containing 1 (Thumpd1), mRNA [NM_145585]	GO:0008150|GO:0003674|GO:0003723|GO:0005575	NM_145585	Mm.26392	233802	2469.83	11446.2	11.494	12.7459	2488.97	2452.26	2468.27	11549.7	11361.1	11427.8	11.4825	11.5066	11.493	12.767	12.7364	12.7342
A_66_P116098	6.34176e-08	1.20801e-06	2.35878	up	NM_008977	chr18:67837400-67835518	Ptpn2	Mus musculus protein tyrosine phosphatase, non-receptor type 2 (Ptpn2), transcript variant 1, mRNA [NM_008977]	GO:0008286|GO:0005515|GO:0008285|GO:0005886|GO:0042527|GO:0005783|GO:0042524|GO:0005634|GO:0035335|GO:0016791|GO:0060336|GO:0005737|GO:0050922|GO:0006470|GO:0060339|GO:0030183|GO:0070104|GO:0070373|GO:0004721|GO:0004725|GO:0004726|GO:0019905|GO:2000587|GO:0042518|GO:0030971|GO:0005793|GO:0019901|GO:0046627|GO:0045722|GO:0042059|GO:0042593|GO:0045650|GO:0010804|GO:0050860|GO:0010888|GO:0005178|GO:…	NM_008977	Mm.260433	19255	648.045	3000.82	9.40046	10.6385	658.989	633.952	651.193	2931.22	3034.37	3036.87	9.39952	9.38789	9.41396	10.6197	10.6541	10.6416
A_55_P2138100	6.47949e-08	1.22112e-06	3.78832	up		chr9:3016673-3016732		predicted gene 10720 [Source:MGI Symbol;Acc:MGI:3641687] [ENSMUST00000099050]					416.303	2997.78	8.71243	10.634	420.909	410.917	417.085	2965.71	2932.29	3095.33	8.70796	8.71263	8.71672	10.6358	10.5995	10.6667
A_51_P297925	6.48986e-08	1.22163e-06	3.73132	up	NM_153159	chr4:124795929-124795870	Zc3h12a	Mus musculus zinc finger CCCH type containing 12A (Zc3h12a), mRNA [NM_153159]	GO:0005515|GO:0005886|GO:0032715|GO:0032720|GO:0006915|GO:0032088|GO:0005634|GO:0007275|GO:0010884|GO:0001525|GO:0046872|GO:0030154|GO:0010628|GO:0004518|GO:0005737|GO:0071222|GO:0004519|GO:0016787|GO:0045019|GO:0010629|GO:0045600|GO:2000379|GO:0010508	NM_153159	Mm.402	230738	341.902	2446.88	8.40228	10.302	340.356	340.6	344.751	2452.03	2440.58	2448.04	8.36933	8.4223	8.4152	10.3202	10.2999	10.2858
A_51_P286737	6.49381e-08	1.22163e-06	3.45927	up	NM_011333	chr11:81850650-81850709	Ccl2	Mus musculus chemokine (C-C motif) ligand 2 (Ccl2), mRNA [NM_011333]	GO:0005515|GO:0009408|GO:0035684|GO:0008360|GO:0019221|GO:0090265|GO:0005615|GO:0006955|GO:0005737|GO:0006954|GO:0035702|GO:0006935|GO:0071356|GO:0007010|GO:0031727|GO:0043025|GO:0007179|GO:0008201|GO:0048010|GO:0008009|GO:0070098|GO:0001664|GO:2000427|GO:0030593|GO:0006874|GO:0009611|GO:0005576|GO:0001525|GO:0005125|GO:0010574|GO:0071222|GO:0071346|GO:0001938|GO:0050870|GO:0050806|GO:0071347|GO:…	NM_011333	Mm.290320	20296	277.286	1822.39	8.06219	9.85265	280.517	279.793	271.547	1825.96	1816.56	1824.65	8.05968	8.08826	8.03862	9.87425	9.84734	9.83637
A_55_P2157360	6.51258e-08	1.22406e-06	2.38523	up	NM_147155	chr17:7159919-7159860	Tagap1	Mus musculus T cell activation GTPase activating protein 1 (Tagap1), mRNA [NM_147155]	GO:0008150|GO:0003674|GO:0005575	NM_147155	Mm.371734	380608	1894.68	8866.62	11.0943	12.3484	1915.53	1856.61	1911.89	8782.97	8934.89	8881.99	11.0833	11.0857	11.1138	12.3388	12.3648	12.3416
A_55_P2091350	6.52353e-08	1.22503e-06	2.75181	up	AK140187	chr1:24619302-24619243	ND4L	mitochondrially encoded NADH dehydrogenase 4L [Source:MGI Symbol;Acc:MGI:102497] [ENSMUST00000084013]	GO:0005739|GO:0016491|GO:0008137|GO:0055114		Mm.491081	17720	21788.5	77897.5	14.8496	16.31	22174.7	21437.6	21753.3	81242.3	76503.8	75946.3	14.8472	14.8498	14.8517	16.3395	16.2977	16.2927
A_55_P2008567	6.53539e-08	1.22616e-06	2.43688	up	NM_009096	chr4:86500122-86500063	Rps6	Mus musculus ribosomal protein S6 (Rps6), mRNA [NM_009096]	GO:0048471|GO:0043066|GO:0033077|GO:0007093|GO:0007369|GO:0006364|GO:0001890|GO:0006924|GO:0000082|GO:0005737|GO:0007067|GO:0002309|GO:0022627|GO:0048821|GO:0030529|GO:0022605|GO:0005840|GO:0042274|GO:0005844	NM_009096	Mm.379007	20104	846.188	4062.96	9.83282	11.1179	866.525	827.66	844.378	4019.61	4028.31	4140.96	9.84866	9.81941	9.83041	11.116	11.1016	11.136
A_55_P2040993	6.57151e-08	1.22855e-06	2.12785	up		chr15:005902647-005902706							163.54	659.777	7.25191	8.3413	166.783	162.508	161.329	648.697	665.188	665.446	7.26605	7.25739	7.23228	8.33755	8.35056	8.3358
A_52_P272534	6.59542e-08	1.23008e-06	2.73486	up		chr10:072664594-072664653							564.687	3000.72	9.1855	10.637	575.602	547.163	571.296	2931.16	3023.75	3047.26	9.18977	9.16321	9.20353	10.619	10.6454	10.6465
A_55_P2059025	6.65849e-08	1.23575e-06	2.3025	up	NM_001163769	chr17:31784139-31784080	U2af1	Mus musculus U2 small nuclear ribonucleoprotein auxiliary factor (U2AF) 1 (U2af1), transcript variant 2, mRNA [NM_001163769]	GO:0005515|GO:0006397|GO:0008380|GO:0003723|GO:0005634|GO:0050733|GO:0071013|GO:0003676|GO:0046872|GO:0019013|GO:0000166|GO:0016607|GO:0030529|GO:0005681|GO:0019012	NM_001163769	Mm.379289	108121	6748.14	27409.2	12.9664	14.1696	6818.32	6753.11	6672.99	27412.8	27467.8	27347.1	12.9551	12.9884	12.9557	14.1618	14.1805	14.1665
A_55_P2064512	6.6688e-08	1.23575e-06	5.48196	up		chr4:146817783-146817842							13.1366	93.576	3.17807	5.63276	13.594	13.5798	12.2359	94.1655	92.6649	93.8976	3.21762	3.16701	3.14958	5.66176	5.61312	5.6234
A_55_P2117146	6.70895e-08	1.24199e-06	2.66024	up	NM_011119	chr10:127997210-127997151	Pa2g4	Mus musculus proliferation-associated 2G4 (Pa2g4), mRNA [NM_011119]	GO:0006355|GO:0003700|GO:0003723|GO:0006364|GO:0005730|GO:0005634|GO:0003677|GO:0006351|GO:0006417|GO:0005737|GO:0016787|GO:0030529|GO:0045892|GO:0031625	NM_011119	Mm.4742	18813	379.741	1980.1	8.56851	9.98007	389.924	370.533	378.767	1990.69	1964.12	1985.49	8.58421	8.55528	8.56605	10.0036	9.96696	9.96961
A_65_P08864	6.72608e-08	1.24308e-06	3.56684	up	AK046753	chr3:115603768-115603827	Dph5	Mus musculus 4 days neonate thymus cDNA, RIKEN full-length enriched library, clone:B630008G01 product:Weakly similar to putative diphthine synthase, full insert sequence. [AK046753]	GO:0008150|GO:0003674|GO:0004164|GO:0008168|GO:0008152|GO:0005575|GO:0032259|GO:0017183|GO:0016740		Mm.5915	69740	166.965	1121.59	7.286	9.12065	165.614	166.031	169.25	1096.54	1133.63	1134.59	7.25466	7.2908	7.31255	9.10469	9.13348	9.12378
A_51_P134007	6.80337e-08	1.24968e-06	2.41021	up	NM_010880	chr1:88248012-88247953	Ncl	Mus musculus nucleolin (Ncl), mRNA [NM_010880]	GO:0005515|GO:0003723|GO:0042162|GO:0005730|GO:0005634|GO:0001525|GO:0003676|GO:0008022|GO:0003677|GO:0042802|GO:0005737|GO:0000166|GO:0030529|GO:0005654|GO:0005938	NM_010880	Mm.154378	17975	4415.84	19906.4	12.3559	13.6251	4477.48	4411.84	4358.2	19967.8	19914.5	19837	12.3453	12.3793	12.3431	13.6332	13.6284	13.6136
A_55_P2112564	6.83535e-08	1.25227e-06	4.72706	up	AK149515	chr11:106319957-106319898	Ern1	endoplasmic reticulum (ER) to nucleus signalling 1 [Source:MGI Symbol;Acc:MGI:1930134] [ENSMUST00000106799]	GO:0005515|GO:0006986|GO:0090305|GO:0005783|GO:0005637|GO:0030176|GO:0003824|GO:0046872|GO:0042802|GO:0030968|GO:0005739|GO:0046777|GO:0000166|GO:1900103|GO:0016301|GO:0007050|GO:0016772|GO:0006397|GO:0006355|GO:0000287|GO:0006915|GO:0004540|GO:0004521|GO:0005524|GO:0006351|GO:0016310|GO:0004672|GO:0004519|GO:0016787|GO:0016020|GO:0070059|GO:0004674|GO:0008152|GO:0005789|GO:0070055|GO:0006468|GO:…		Mm.340943	78943	18.146	113.954	3.66664	5.90758	18.5055	18.274	17.6586	113.745	113.923	114.195	3.69343	3.62519	3.68129	5.92661	5.90149	5.89464
A_55_P2062774	6.84832e-08	1.2535e-06	2.16207	up		chr12:089590651-089590592							67.7457	243.85	5.82449	6.9369	68.2374	68.0238	66.9759	241.647	240.897	249.006	5.81588	5.83258	5.82501	6.94327	6.9165	6.95093
A_55_P2026945	6.87422e-08	1.25393e-06	2.45558	up	NM_017381	chr3:157207971-157208030	Zranb2	Mus musculus zinc finger, RAN-binding domain containing 2 (Zranb2), mRNA [NM_017381]	GO:0008380|GO:0006397|GO:0003723|GO:0008270|GO:0005634|GO:0046872	NM_017381	Mm.259036	53861	458.348	2220.1	8.86299	10.1591	473.185	447.339	454.521	2175.91	2242.21	2242.16	8.88546	8.85344	8.85008	10.1467	10.1718	10.1587
A_55_P2193419	6.98441e-08	1.26982e-06	5.27304	up	AK076305	chr15:99900789-99900848	4731420N21	Mus musculus 10 days neonate skin cDNA, RIKEN full-length enriched library, clone:4731420N21 product:unclassifiable, full insert sequence. [AK076305]			Mm.442515	328606	324.878	3164.8	8.31467	10.7133	329.682	312.828	332.124	3099.38	3181	3214.02	8.31643	8.27262	8.35498	10.6989	10.7177	10.7234
A_55_P2187235	7.13632e-08	1.28088e-06	2.38661	up	AF006582	chr12:114826597-114826538		Mus musculus anti-DNA autoantibody heavy chain variable region mRNA, partial cds. [AF006582]			Mm.462717		258.906	1193.33	7.96011	9.21507	262.873	255.004	258.839	1164.25	1198.48	1217.27	7.95769	7.96063	7.962	9.19099	9.2184	9.23582
A_55_P2035315	7.16935e-08	1.28438e-06	4.04186	up	NM_145839	chr5:99646507-99646448	Rasgef1b	Mus musculus RasGEF domain family, member 1B (Rasgef1b), transcript variant 1, mRNA [NM_145839]	GO:0005622|GO:0005085|GO:0051056|GO:0050790|GO:0007264|GO:0005768|GO:0005088	NM_145839	Mm.259074	320292	1179	8999.94	10.3551	12.3701	1182.66	1181.91	1172.44	8966.17	8834.39	9199.25	10.334	10.3852	10.346	12.3741	12.3436	12.3926
A_51_P147284	7.19101e-08	1.28606e-06	2.46956	up	NM_198014	chr14:104103360-104103419	Slain1	Mus musculus SLAIN motif family, member 1 (Slain1), mRNA [NM_198014]	GO:0008150|GO:0003674|GO:0005575	NM_198014	Mm.27548	105439	729.165	3560.02	9.59133	10.8956	743.542	715.275	728.678	3552.61	3510.3	3617.15	9.5997	9.58433	9.58996	10.9077	10.8698	10.9092
A_55_P2017645	7.21097e-08	1.28663e-06	2.17641	up	NM_011530	chr17:34353116-34353175	Tap2	Mus musculus transporter 2, ATP-binding cassette, sub-family B (MDR/TAP) (Tap2), mRNA [NM_011530]	GO:0005515|GO:0005215|GO:0042824|GO:0042825|GO:0042288|GO:0005886|GO:0006200|GO:0005783|GO:0002237|GO:0042626|GO:0030176|GO:0005634|GO:0015031|GO:0002591|GO:0042803|GO:0043231|GO:0046968|GO:0046967|GO:0015833|GO:0000166|GO:0019885|GO:0042605|GO:0002489|GO:0006810|GO:0015197|GO:0016887|GO:0015421|GO:0042270|GO:0017111|GO:0019060|GO:0002481|GO:0046982|GO:0035672|GO:0046980|GO:0002485|GO:0043657|GO:…	NM_011530	Mm.14814	21355	4475.93	18167.2	12.3736	13.4956	4561.17	4377.4	4489.21	18128.3	18323.1	18050.3	12.3724	12.3682	12.3803	13.4971	13.5142	13.4755
A_55_P2142858	7.21497e-08	1.28663e-06	3.97856	up	AK037903	chr16:35968243-35968302	Parp9	poly (ADP-ribose) polymerase family, member 9 [Source:MGI Symbol;Acc:MGI:1933117] [ENSMUST00000114877]	GO:0005737|GO:0006281|GO:0005634|GO:0060330|GO:0016740|GO:0006974|GO:0006302|GO:0003950			80285	51.7954	332.36	5.37417	7.36641	51.8315	51.8485	51.7062	319.305	336.534	341.241	5.36634	5.36597	5.3902	7.32875	7.37821	7.39228
A_51_P275642	7.27799e-08	1.29108e-06	4.1829	up	JX120338	chr12:115097608-115097549		Mus musculus strain C57BL/6 clone 95 immunoglobulin heavy chain mRNA, partial cds. [JX120338]			Mm.436014		571.475	4469.34	9.20466	11.2692	581.279	571.374	561.77	4350.74	4509.91	4547.37	9.20534	9.22914	9.17949	11.2367	11.284	11.2868
A_52_P256279	7.31996e-08	1.29458e-06	4.09242	up	NM_173026	chr16:56008005-56008064	Zbtb11	Mus musculus zinc finger and BTB domain containing 11 (Zbtb11), mRNA [NM_173026]	GO:0008150|GO:0003674|GO:0005634	NM_173026	Mm.282814	271377	236.073	1820.99	7.81996	9.85291	233.959	234.18	240.08	1826.36	1826.01	1810.6	7.78672	7.83016	7.84299	9.87464	9.85413	9.82996
A_55_P1967483	7.43388e-08	1.29912e-06	2.10651	up		chr2:024350964-024351023							3565.53	14675.2	12.0419	13.1167	3647.38	3544.69	3504.51	14675.5	14646.8	14703.3	12.049	12.0557	12.0208	13.1225	13.1179	13.1097
A_52_P366525	7.47135e-08	1.29912e-06	10.9694	up	NM_001039710	chr1:55121201-55124383	Coq10b	Mus musculus coenzyme Q10 homolog B (S. cerevisiae) (Coq10b), transcript variant 1, mRNA [NM_001039710]	GO:0005739|GO:0008150|GO:0003674|GO:0016020|GO:0005743	NM_001039710	Mm.281019	67876	320.363	6147.45	8.29197	11.7474	331.754	303.43	325.904	5984.47	6212.7	6245.2	8.32724	8.22391	8.32477	11.721	11.762	11.7591
A_55_P2148182	7.474e-08	1.29912e-06	2.43496	up		chr1:045946283-045946224							1047.54	5096.92	10.1708	11.4547	1060.66	1027.97	1053.99	4981.23	5086.93	5222.59	10.1621	10.1664	10.184	11.4359	11.4518	11.4765
A_55_P1992160	7.50793e-08	1.30151e-06	2.77871	up	NM_010777	chr18:82691469-82691528	Mbp	Mus musculus myelin basic protein (Mbp), transcript variant 7, mRNA [NM_010777]	GO:0005886|GO:0042552|GO:0009636|GO:0005634|GO:0042995|GO:0002020|GO:0071944|GO:0005737|GO:0033269|GO:0016020|GO:0043209|GO:0043025|GO:0061024|GO:0019911	NM_010777	Mm.252063	17196	31.2053	124.611	4.55466	6.02908	31.5506	31.0589	31.0063	121.622	125.324	126.885	4.56363	4.52532	4.57503	6.02076	6.03338	6.03308
A_51_P326191	7.52822e-08	1.30151e-06	4.08691	up	NM_009251	chr12:105480045-105480104	Serpina3g	Mus musculus serine (or cysteine) peptidase inhibitor, clade A, member 3G (Serpina3g), mRNA [NM_009251]	GO:0004869|GO:0004867|GO:0010466|GO:0006915|GO:0043434|GO:0005576|GO:0005634|GO:0030414|GO:0005615|GO:0010951|GO:0030162|GO:0005737|GO:0034097	NM_009251	Mm.312628	20715	2704.09	20282.3	11.6322	13.6632	2690.78	2744.35	2677.13	20289	20227.6	20330.3	11.6002	11.6729	11.6235	13.6648	13.6648	13.66
A_65_P02323	7.54771e-08	1.30224e-06	4.652	up	AK079056	chr3:97718922-97718981	Sec22b	Mus musculus adult male diencephalon cDNA, RIKEN full-length enriched library, clone:9330109A20 product:unclassifiable, full insert sequence. [AK079056]	GO:0019905|GO:0005794|GO:0005783|GO:0005623|GO:0015031|GO:0005622|GO:0006888|GO:0000139|GO:0016020|GO:0005789|GO:0006810|GO:0016021|GO:0016192		Mm.2551	20333	98.1246	818.874	6.43304	8.65089	101.588	96.3335	96.4526	788.405	834.087	834.13	6.46258	6.42067	6.41586	8.61463	8.67207	8.66596
A_55_P2020153	7.59687e-08	1.30639e-06	2.23808	up	NM_007808	chr6:50515151-50515092	Cycs	Mus musculus cytochrome c, somatic (Cycs), mRNA [NM_007808]	GO:0005739|GO:0008635|GO:0009055|GO:0006915|GO:0042743|GO:0020037|GO:0005829	NM_007808	Mm.35389	13063	8495.29	31660.9	13.3102	14.4724	8499.73	8459.66	8526.47	32054.3	31477.6	31450.7	13.2902	13.3242	13.3161	14.484	14.473	14.4603
A_52_P205797	7.60115e-08	1.30639e-06	5.45184	up	NM_177683	chr6:114871409-114871350	Vgll4	Mus musculus vestigial like 4 (Drosophila) (Vgll4), mRNA [NM_177683]	GO:0008150|GO:0003674|GO:0006355|GO:0005634|GO:0006351	NM_177683	Mm.268357	232334	154.745	1535.8	7.16871	9.61546	159.905	150.824	153.506	1559.43	1515.91	1532.07	7.19703	7.14357	7.16555	9.65709	9.59397	9.59532
A_66_P111216	7.6028e-08	1.30639e-06	4.41428	up	AK014157	chr7:99888702-99888643		RIKEN cDNA 4632427E13 gene [Source:MGI Symbol;Acc:MGI:1915436] [ENSMUST00000098305]			Mm.473620		167.697	1375.01	7.29456	9.43674	173.725	163.407	165.958	1379.89	1369.88	1375.25	7.33321	7.26802	7.28245	9.45849	9.4306	9.42112
A_52_P423021	7.62094e-08	1.30828e-06	2.66479	up	NM_028059	chr16:64784762-64784703	Zfp654	Mus musculus zinc finger protein 654 (Zfp654), mRNA [NM_028059]	GO:0008150|GO:0006355|GO:0005634|GO:0003677|GO:0046872|GO:0006351	NM_028059	Mm.25960	72020	334.335	1722.84	8.36307	9.77709	336.982	327.401	338.621	1690.4	1745.45	1732.67	8.35338	8.34919	8.38665	9.76692	9.79549	9.76886
A_55_P2024749	7.63247e-08	1.30828e-06	2.93673	up	NM_028394	chr4:106952416-106952475	Hspb11	Mus musculus heat shock protein family B (small), member 11 (Hspb11), mRNA [NM_028394]	GO:0005622|GO:0005929|GO:0003674|GO:0005813|GO:0042073|GO:0006950|GO:0005623|GO:0030992|GO:0007155	NM_028394	Mm.21787	72938	1210.82	6930.48	10.3958	11.95	1216.55	1191.06	1224.85	6891.9	6999.73	6899.82	10.3741	10.3962	10.4171	11.9573	11.9641	11.9286
A_55_P2011794	7.6514e-08	1.30992e-06	2.89103	up									519.039	2910.33	9.06062	10.5922	520.753	506.69	529.674	2881.23	2915.22	2934.53	9.03965	9.04969	9.09252	10.5951	10.5911	10.5904
A_55_P2022114	7.67242e-08	1.31086e-06	2.89061	up		chrX:154687330-154687389							281.783	1537.57	8.08617	9.61754	283.644	280.471	281.235	1490.4	1553.26	1569.05	8.07691	8.09488	8.0867	9.58667	9.63275	9.63321
A_55_P2061061	7.71014e-08	1.3141e-06	2.02666	up	NM_001204875	chr2:29926444-29926503	Set	Mus musculus SET nuclear oncogene (Set), transcript variant 2, mRNA [NM_001204875]	GO:0043234|GO:0048471|GO:0043524|GO:0005737|GO:0005783|GO:0006334|GO:0005634|GO:0045892|GO:0003677	NM_001204875	Mm.335942	56086	2730.3	10905.9	11.6457	12.6648	2801.22	2676.33	2713.35	10792	10894.8	11030.8	11.6643	11.6332	11.6395	12.655	12.6662	12.6732
A_55_P2142226	7.7908e-08	1.32249e-06	5.12459	up	NM_001168294	chr12:105492556-105492615	Serpina3f	Mus musculus serine (or cysteine) peptidase inhibitor, clade A, member 3F (Serpina3f), transcript variant 1, mRNA [NM_001168294]	GO:0030162|GO:0010951|GO:0004867|GO:0010466|GO:0043434|GO:0005576|GO:0034097|GO:0030414|GO:0005615	NM_001168294	Mm.483584	238393	176.377	1670.92	7.37958	9.73701	175.55	178.815	174.764	1683.98	1669.92	1658.87	7.3522	7.42147	7.36506	9.76104	9.7355	9.71451
A_55_P2005135	7.8581e-08	1.33284e-06	2.25068	up	NM_001008546	chr4:147992832-147991744	Tardbp	Mus musculus TAR DNA binding protein (Tardbp), transcript variant 4, mRNA [NM_001008546]	GO:0008380|GO:0005515|GO:0006397|GO:0006355|GO:0006366|GO:0003723|GO:0001205|GO:0005634|GO:0003676|GO:0003677|GO:0006351|GO:0043922|GO:0042802|GO:0003690|GO:0000166|GO:0045944|GO:0003730|GO:0070935	NM_001008546	Mm.22453	230908	543.885	2448.96	9.13417	10.3045	549.625	540.013	542.019	2389.89	2481.72	2475.27	9.12804	9.14176	9.1327	10.2837	10.3248	10.305
A_51_P391955	7.91744e-08	1.33966e-06	2.54765	up	NM_029723	chr2:59342824-59342883	Dapl1	Mus musculus death associated protein-like 1 (Dapl1), mRNA [NM_029723]	GO:0008150|GO:0003674|GO:0006915|GO:0005575|GO:0030154	NM_029723	Mm.275769	76747	1052.77	5358.81	10.1794	11.5286	1065.27	1029.08	1063.96	5272.5	5422.78	5381.15	10.1682	10.1685	10.2016	11.5166	11.5468	11.5224
A_55_P2009576	7.95817e-08	1.34241e-06	2.14541	up	NR_004432	chr15:82980096-82980155	Rnu12	Mus musculus RNA U12, small nuclear (Rnu12), small nuclear RNA [NR_004432]		NR_004432	Mm.471434	104307	1814.03	7698.89	11.0202	12.1214	1859.05	1765.08	1817.96	7737.53	7651.14	7708.02	11.0343	11.0042	11.022	12.1373	12.1126	12.1143
A_55_P2146389	8.00756e-08	1.3471e-06	5.53851	up	XM_003945462	chr10:7512380-7512321	6530403G13Rik	RIKEN cDNA 6530403G13 gene [Source:MGI Symbol;Acc:MGI:1923477] [ENSMUST00000065124]	GO:0008150|GO:0003674|GO:0005575	XM_003945462	Mm.441023	76227	248.419	2552.22	7.89502	10.3645	254.611	248.586	242.06	2577.89	2545.34	2533.44	7.90128	7.92574	7.85804	10.3985	10.3559	10.3391
A_52_P229709	8.06371e-08	1.35029e-06	3.00289	up	NM_025356	chr3:135123030-135125958	Ube2d3	Mus musculus ubiquitin-conjugating enzyme E2D 3 (Ube2d3), mRNA [NM_025356]	GO:0000209|GO:0005515|GO:0006511|GO:0004842|GO:0016567|GO:0006513|GO:0016881|GO:0005886|GO:0016874|GO:0006915|GO:0005575|GO:0005524|GO:0006974|GO:0006281|GO:0070979|GO:0016020|GO:0000166|GO:0043161|GO:0070936|GO:0005768	NM_025356	Mm.49884	66105	4678.49	25042.5	12.4324	14.0187	4753.78	4511.98	4769.69	25311.3	24893.4	24922.7	12.4347	12.4045	12.4579	14.0311	14.0189	14.0061
A_55_P2040295	8.16589e-08	1.36007e-06	4.30873	up	NM_011200	chr1:30999620-30999561	Ptp4a1	Mus musculus protein tyrosine phosphatase 4a1 (Ptp4a1), mRNA [NM_011200]	GO:0030335|GO:0005886|GO:0005783|GO:0005634|GO:0007275|GO:0035335|GO:0016791|GO:0005737|GO:0007049|GO:0006470|GO:0016787|GO:0016020|GO:0016311|GO:0009898|GO:0004721|GO:0004727|GO:0005856|GO:0004725|GO:0005768	NM_011200	Mm.491181	19243	928.501	7586.89	9.99126	12.0985	928.584	933.847	923.073	7408.38	7619.12	7733.18	9.96527	10.0224	9.98615	12.0685	12.107	12.1201
A_55_P1990633	8.20672e-08	1.36554e-06	8.4826	up	NM_001146275	chr18:60550839-60550898	Iigp1	Mus musculus interferon inducible GTPase 1 (Iigp1), transcript variant 2, mRNA [NM_001146275]	GO:0005794|GO:0016817|GO:0035458|GO:0005783|GO:0020005|GO:0019221|GO:0003924|GO:0042832|GO:0005634|GO:0005525|GO:0042802|GO:0006184|GO:0050829|GO:0005737|GO:0000166|GO:0016020|GO:0016787|GO:0045087|GO:0005789|GO:0010506|GO:0019003	NM_001146275	Mm.261140	60440	382.71	5832.51	8.58023	11.6647	377.512	379.129	391.49	5621.43	5913.84	5962.27	8.53123	8.59227	8.61718	11.6218	11.6865	11.6859
A_55_P1958693	8.2258e-08	1.36763e-06	9.42202	up	AK014289	chr5:28679343-28679402	Rbm33	RNA binding motif protein 33 [Source:MGI Symbol;Acc:MGI:1919670] [ENSMUST00000030920]	GO:0008150|GO:0003674|GO:0000166|GO:0005575|GO:0003676		Mm.304075	381626	8.59809	121.145	2.75554	5.99158	8.2024	9.0984	8.49348	122.739	120.853	119.844	2.70608	2.75661	2.80392	6.03051	5.98431	5.9599
A_52_P638319	8.27509e-08	1.37194e-06	2.19932	up		chr1:016757890-016757831							127.169	520.107	6.85998	7.99703	128.714	128.319	124.475	512.16	520.644	527.518	6.86174	6.87914	6.83905	7.9942	7.9917	8.00519
A_55_P2065506	8.28433e-08	1.37194e-06	2.11086	up	JX120262	chr12:116118334-116118275		Mus musculus strain C57BL/6 clone 20 immunoglobulin heavy chain mRNA, partial cds. [JX120262]			Mm.425757		148.987	595.601	7.11016	8.18799	150.868	148.143	147.95	588.496	603.673	594.635	7.10727	7.11557	7.10766	8.18777	8.20779	8.16841
A_55_P2151751	8.35475e-08	1.37314e-06	2.34011	up	NM_010771	chr18:35747504-35748041	Matr3	Mus musculus matrin 3 (Matr3), mRNA [NM_010771]	GO:0000166|GO:0003723|GO:0008270|GO:0005634|GO:0003676|GO:0046872	NM_010771	Mm.215034	17184	1990.07	9170.41	11.1733	12.3999	2025.77	1980.33	1964.1	9235.37	9043.61	9232.25	11.1811	11.1821	11.1568	12.417	12.381	12.4018
A_55_P2112922	8.35577e-08	1.37314e-06	2.0351	up	NM_011830	chr9:108467836-108467895	Impdh2	Mus musculus inosine 5'-phosphate dehydrogenase 2 (Impdh2), mRNA [NM_011830]	GO:0003938|GO:0003723|GO:0005634|GO:0003824|GO:0003677|GO:0046872|GO:0005737|GO:0006177|GO:0000166|GO:0051289|GO:0030554|GO:0016491|GO:0071353|GO:0046651|GO:0005778|GO:0055114|GO:0006164	NM_011830	Mm.6065	23918	6286.41	22992	12.8506	13.8757	6335.92	6284.96	6238.35	23262.5	22773.6	22940	12.8387	12.869	12.8441	13.8878	13.8696	13.8696
A_55_P1997486	8.36191e-08	1.37314e-06	2.37274	up	NM_011482	chr15:81872717-81872658	Nhp2l1	Mus musculus NHP2 non-histone chromosome protein 2-like 1 (S. cerevisiae) (Nhp2l1), mRNA [NM_011482]	GO:0007338|GO:0030515|GO:0005886	NM_011482	Mm.299312	20826	2862.1	13299	11.7167	12.9632	2942.22	2780.14	2863.95	13240	13301.1	13355.9	11.7342	11.6906	11.7253	12.9595	12.9681	12.9621
A_55_P2074075	8.36303e-08	1.37314e-06	3.14718	up	AK155776	chr3:133176479-133176421	Tet2	Mus musculus B6-derived CD11 +ve dendritic cells cDNA, RIKEN full-length enriched library, clone:F730219J07 product:hypothetical protein, full insert sequence. [AK155776]	GO:0030097|GO:0001822|GO:0080182|GO:0005634|GO:0051213|GO:0009791|GO:0046872|GO:0007049|GO:0006493|GO:0045944|GO:0080111|GO:0016491|GO:0030099|GO:0070579|GO:0016568|GO:0055114		Mm.347816	214133	96.9245	547.386	6.41199	8.06605	99.5973	96.8427	94.3336	542.933	546.987	552.237	6.42995	6.4293	6.37673	8.07284	8.06113	8.06419
A_55_P2049410	8.40968e-08	1.37537e-06	2.12942	up	NM_011753	chr9:20239653-20239594	Zfp26	Mus musculus zinc finger protein 26 (Zfp26), mRNA [NM_011753]	GO:0005622|GO:0006355|GO:0005634|GO:0003676|GO:0003677|GO:0046872	NM_011753	Mm.107441	22688	139.515	560.075	7.00833	8.09878	139.698	138.499	140.349	548.861	568.715	562.649	6.9942	7.00824	7.02254	8.09034	8.11598	8.09004
A_66_P129873	8.43343e-08	1.37818e-06	2.27771	up	NM_008722	chr11:33054041-33052849	Npm1	Mus musculus nucleophosmin 1 (Npm1), transcript variant 1, mRNA [NM_008722]	GO:0005515|GO:0048025|GO:0001652|GO:0032071|GO:0051259|GO:0042803|GO:0006884|GO:0005622|GO:0043523|GO:0006407|GO:0045860|GO:0051260|GO:0043023|GO:0042273|GO:0043024|GO:0042274|GO:0005856|GO:0005813|GO:0046982|GO:0019901|GO:0007569|GO:0045740|GO:0003713|GO:0006950|GO:0006334|GO:0005547|GO:0043085|GO:0030957|GO:0006281|GO:0016049|GO:0005654|GO:0051082|GO:0019899|GO:0060735|GO:0008284|GO:0008285|GO:…	NM_008722	Mm.485384	18148	13160.3	45218.1	13.984	15.1716	13272.5	12833.2	13375	46199.9	44814.2	44640.2	13.9753	13.9697	14.0069	15.1831	15.1658	15.1658
A_55_P2168417	8.48982e-08	1.38096e-06	2.46763	up	NM_029402	chr18:3436224-3436283	Cul2	Mus musculus cullin 2 (Cul2), mRNA [NM_029402]	GO:0005515|GO:0031461|GO:0030163|GO:0006511|GO:0030891|GO:0031462|GO:0032403|GO:0031625	NM_029402	Mm.291707	71745	121.843	558.925	6.79173	8.09486	122.941	122.889	119.699	542.842	561.603	572.331	6.78657	6.80484	6.78378	8.07207	8.09699	8.11552
A_66_P121965	8.52885e-08	1.38292e-06	2.52859	up	NM_001167996	chr3:68676000-68676059	1110032F04Rik	Mus musculus RIKEN cDNA 1110032F04 gene (1110032F04Rik), mRNA [NM_001167996]	GO:0008150|GO:0003674|GO:0016020|GO:0016021|GO:0005575	NM_001167996	Mm.45741	68725	292.021	1414.36	8.1467	9.48503	293.452	288.673	293.938	1390.05	1434.72	1418.33	8.13054	8.14552	8.16405	9.47241	9.50683	9.47587
A_51_P413059	8.53708e-08	1.38292e-06	2.66695	up	NM_008572	chr14:56702674-56702300	Mcpt8	Mus musculus mast cell protease 8 (Mcpt8), mRNA [NM_008572]	GO:0016787|GO:0004252|GO:0006508|GO:0008236|GO:0008233|GO:0005576|GO:0003824	NM_008572	Mm.41979	17231	196.891	1006.07	7.54762	8.96281	199.583	193.064	198.027	974.106	1017.8	1026.3	7.54882	7.53799	7.55606	8.93384	8.97513	8.97947
A_55_P2150389	8.54795e-08	1.38292e-06	5.05132	up	NM_030046	chr15:10393702-10393643	Dnajc21	Mus musculus DnaJ (Hsp40) homolog, subfamily C, member 21 (Dnajc21), mRNA [NM_030046]	GO:0008150|GO:0003674|GO:0005575	NM_030046	Mm.297862	78244	62.0839	525.038	5.67434	8.011	64.4572	61.2356	60.5587	513.05	524.02	538.045	5.72	5.65212	5.6509	7.99749	8.00178	8.03372
A_55_P1989061	8.55808e-08	1.38292e-06	2.59518	up	NM_001077364	chrX:137074153-137074094	Tsc22d3	Mus musculus TSC22 domain family, member 3 (Tsc22d3), transcript variant 1, mRNA [NM_001077364]	GO:0006355|GO:0005737|GO:0003700|GO:0070236|GO:0043426|GO:0006970|GO:0005634|GO:0000122|GO:0048642	NM_001077364	Mm.22216	14605	22652.4	76620.9	14.9085	16.2843	23179.5	22524	22253.7	79177.7	74903.4	75781.5	14.9102	14.926	14.8893	16.3003	16.2641	16.2886
A_52_P434974	8.56104e-08	1.38292e-06	2.26672	up	NM_152234	chr13:58278951-58278892	Ubqln1	Mus musculus ubiquilin 1 (Ubqln1), transcript variant 2, mRNA [NM_152234]	GO:0000502|GO:0034976|GO:0048471|GO:0005783|GO:0019904|GO:0005102|GO:0097194|GO:0071456|GO:0005634|GO:0019215|GO:0043234|GO:0005737|GO:0031396|GO:0019900	NM_152234	Mm.182053	56085	2083.07	9303.58	11.2414	12.422	2145.26	2059.66	2044.29	9262.35	9283.84	9364.55	11.2636	11.2418	11.2189	12.4223	12.4208	12.423
A_55_P2016249	8.60238e-08	1.38766e-06	2.13083	up	NM_026352	chr3:79401751-79402728	Ppid	Mus musculus peptidylprolyl isomerase D (cyclophilin D) (Ppid), mRNA [NM_026352]	GO:0000413|GO:0050714|GO:0051879|GO:0005634|GO:0015031|GO:0005739|GO:0005737|GO:0006457|GO:0031072|GO:0006810|GO:0045111|GO:0045070|GO:0042277|GO:0016018|GO:0043065|GO:0071492|GO:0005730|GO:0003755|GO:0006915|GO:0005528|GO:0000122|GO:0034389|GO:0006461|GO:0061077|GO:0016853|GO:0019899|GO:0008134	NM_026352	Mm.295252	67738	297.409	1231.12	8.17613	9.26754	305.03	290.536	296.661	1225.42	1234.72	1233.23	8.19449	8.15927	8.17462	9.27801	9.26814	9.25648
A_52_P390114	8.60546e-08	1.38766e-06	4.71721	up	NM_145625	chr15:101916459-101916965	Eif4b	Mus musculus eukaryotic translation initiation factor 4B (Eif4b), mRNA [NM_145625]	GO:0000166|GO:0003723|GO:0003743|GO:0003676|GO:0006412|GO:0006413	NM_145625	Mm.290022	75705	103.11	874.121	6.51174	8.74967	107.093	100.489	101.749	864.463	887.686	870.213	6.55138	6.48309	6.50075	8.75226	8.77159	8.72517
A_55_P2046653	8.64097e-08	1.38874e-06	2.28831	up	XM_003689273	chr12:115117366-115117307	LOC100862489	PREDICTED: Mus musculus uncharacterized LOC100862489 (LOC100862489), mRNA [XM_003689273]		XM_003689273	Mm.435580	100862489	327.64	1448.6	8.32903	9.52331	328.521	326.428	327.971	1441.06	1435.54	1469.2	8.30715	8.34338	8.33655	9.53119	9.50954	9.5292
A_52_P417990	8.6565e-08	1.38874e-06	2.45853	up	NM_172754	chr8:72135867-72135808	Zfp868	Mus musculus zinc finger protein 868 (Zfp868), transcript variant 1, mRNA [NM_172754]	GO:0008150|GO:0003674|GO:0005575|GO:0046872	NM_172754	Mm.458487	234362	320.721	1507.42	8.29106	9.58885	323.128	314.229	324.805	1480.01	1507.19	1535.05	8.27681	8.27954	8.31682	9.57953	9.587	9.60002
A_51_P343517	8.81038e-08	1.40379e-06	2.95068	up	NM_010742	chr15:74592610-74592551	Ly6d	Mus musculus lymphocyte antigen 6 complex, locus D (Ly6d), mRNA [NM_010742]	GO:0016020|GO:0009986|GO:0005886|GO:0031225	NM_010742	Mm.878	17068	1060	6157.03	10.1878	11.7489	1085.77	1052.28	1041.95	6186.76	6117.04	6167.29	10.1987	10.2031	10.1616	11.7709	11.7387	11.737
A_52_P590474	8.83388e-08	1.40411e-06	4.73468	up	NM_019937	chr3:65760878-65760819	Ccnl1	Mus musculus cyclin L1 (Ccnl1), mRNA [NM_019937]	GO:0005515|GO:0006396|GO:0006355|GO:0005737|GO:0019901|GO:0016607|GO:0005634|GO:0000079|GO:0008023|GO:0006351	NM_019937	Mm.175612	56706	173.015	1508.19	7.34559	9.58886	174.157	174.852	170.036	1465.3	1537.09	1522.19	7.33529	7.38218	7.31929	9.56154	9.61682	9.58821
A_51_P187901	8.8391e-08	1.40411e-06	2.16925	up	NM_024193	chr2:130102854-130103256	Nop56	Mus musculus NOP56 ribonucleoprotein (Nop56), mRNA [NM_024193]	GO:0008150|GO:0005737|GO:0030515|GO:0042254|GO:0070761|GO:0005732|GO:0005634	NM_024193	Mm.29363	67134	603.312	2620.93	9.28958	10.4068	609.03	592.146	608.76	2593.88	2597.57	2671.33	9.2775	9.29044	9.30081	10.4081	10.3883	10.4239
A_52_P10017	8.91442e-08	1.41287e-06	2.69552	up	NM_181401	chr4:15211620-15211679	Tmem64	Mus musculus transmembrane protein 64 (Tmem64), mRNA [NM_181401]	GO:0005515|GO:0016020|GO:0045780|GO:0005783|GO:0051480|GO:0043462|GO:0045672|GO:0016021	NM_181401	Mm.394111	100201	795.732	4184.69	9.73457	11.1651	793.932	795.974	797.288	4138.41	4208.82	4206.83	9.70572	9.75729	9.74071	11.1643	11.173	11.1581
A_52_P299888	8.98763e-08	1.42019e-06	3.95959	up	NM_053182	chr3:9692584-9692525	Pag1	Mus musculus phosphoprotein associated with glycosphingolipid microdomains 1 (Pag1), transcript variant B, mRNA [NM_053182]	GO:0035556|GO:0005622|GO:0005515|GO:0050863|GO:0016020|GO:0005886|GO:0050868|GO:0045121|GO:0016021|GO:0042169	NM_053182	Mm.23897	94212	51.2003	326.672	5.35569	7.34104	51.695	52.3858	49.52	318.869	331.07	330.076	5.36411	5.38579	5.31715	7.32518	7.35426	7.34366
A_65_P10865	9.02399e-08	1.42211e-06	2.08545	up	NM_029825	chr12:52540300-52543553	Scfd1	Mus musculus Sec1 family domain containing 1 (Scfd1), mRNA [NM_029825]	GO:0019905|GO:0005801|GO:0005794|GO:0005886|GO:0060628|GO:0005783|GO:0006890|GO:0005798|GO:0006892|GO:0015031|GO:0006904|GO:0005737|GO:0047485|GO:0016020|GO:0006810|GO:0017119|GO:0016192	NM_029825	Mm.216511	76983	1459.94	6163.3	10.6907	11.7511	1508.09	1430.31	1441.42	6093.02	6193.46	6203.42	10.7128	10.6823	10.677	11.7447	11.7575	11.7509
A_55_P1970536	9.0268e-08	1.42211e-06	5.87467	up		chr4:122952503-122952444							77.5048	791.625	6.04797	8.60248	76.853	79.6402	76.0212	777.81	790.337	806.727	6.01254	6.10243	6.02893	8.59379	8.59948	8.61415
A_52_P405193	9.17855e-08	1.43366e-06	2.58413	up	NM_028410	chr7:105864527-105864586	Prkrir	Mus musculus protein-kinase, interferon-inducible double stranded RNA dependent inhibitor, repressor of (P58 repressor) (Prkrir), mRNA [NM_028410]	GO:0016310|GO:0008150|GO:0016301|GO:0046983|GO:0005634|GO:0003676|GO:0003677|GO:0046872|GO:0016740	NM_028410	Mm.4428	72981	129.04	621.172	6.88362	8.2533	128.349	129.949	128.822	618.856	618.903	625.756	6.85652	6.90124	6.89309	8.26607	8.2443	8.24952
A_55_P2068772	9.18451e-08	1.43366e-06	2.61904	up	NM_026554	chr16:31957203-31957262	Ncbp2	Mus musculus nuclear cap binding protein subunit 2 (Ncbp2), mRNA [NM_026554]	GO:0008380|GO:0000339|GO:0006397|GO:0003723|GO:0045292|GO:0006370|GO:0005634|GO:0031047|GO:0003676|GO:0006417|GO:0005737|GO:0000166|GO:0000184|GO:0006446|GO:0006810|GO:0005654|GO:0051028|GO:0000340|GO:0005845|GO:0005846	NM_026554	Mm.290027	68092	234.575	1182.26	7.81071	9.19975	237.727	230.638	235.359	1152.28	1185.84	1208.65	7.80752	7.80752	7.81709	9.17267	9.20162	9.22495
A_55_P1989117	9.19002e-08	1.43366e-06	5.68553	up	X05734	chr14:53540654-53540713		Mouse mRNA for T-cell receptor alpha-chain v-d-j region. [X05734]			Mm.486072		163.572	1701.31	7.25198	9.75928	171.104	158.44	161.172	1684.02	1686.53	1733.38	7.3059	7.22014	7.22991	9.76183	9.74676	9.76925
A_52_P585124	9.2123e-08	1.43416e-06	2.8684	up	NM_009911	chr1:130485138-130485079	Cxcr4	Mus musculus chemokine (C-X-C motif) receptor 4 (Cxcr4), mRNA [NM_009911]	GO:0005515|GO:0043130|GO:0019722|GO:0007281|GO:0005764|GO:0060048|GO:0022029|GO:0043067|GO:0006935|GO:0002064|GO:0004950|GO:0051924|GO:0009887|GO:0031625|GO:0032027|GO:0030334|GO:0070098|GO:0009986|GO:0004930|GO:0008045|GO:0019955|GO:0007186|GO:0071345|GO:0007420|GO:0016494|GO:0042119|GO:0009897|GO:0005886|GO:0030426|GO:0042098|GO:0050920|GO:0008144|GO:0004871|GO:0031252|GO:0008354|GO:0001569|GO:…	NM_009911	Mm.1401	12767	4072.91	21512.2	12.2434	13.7637	4161.43	3937.52	4119.77	21488.5	21595.3	21452.8	12.2479	12.2183	12.2641	13.7592	13.7834	13.7484
A_52_P144263	9.21238e-08	1.43416e-06	2.74676	up	NM_020296	chr2:60617864-60617805	Rbms1	Mus musculus RNA binding motif, single stranded interacting protein 1 (Rbms1), transcript variant 3, mRNA [NM_020296]	GO:0006260|GO:0000166|GO:0003723|GO:0005634|GO:0003676|GO:0003677	NM_020296	Mm.259667	56878	353.855	1893.55	8.45477	9.9125	354.785	354.578	352.202	1859.89	1910.96	1909.78	8.43257	8.48227	8.44948	9.90107	9.92555	9.91089
A_55_P2026268	9.27424e-08	1.44058e-06	2.43445	up	M34528	chr6:69773585-69773526		Mouse Ig kappa-chain (anti-insulin Ab 126) mRNA V region, partial cds. [M34528]			Mm.423821		234.615	1101.96	7.81121	9.09481	240.595	229.968	233.283	1090.83	1117.74	1097.31	7.82433	7.80356	7.80575	9.09786	9.11514	9.07143
A_55_P2023037	9.29818e-08	1.44112e-06	5.12122	up	NR_003967	chr7:113565123-113565064	Gm4759	Mus musculus predicted gene 4759 (Gm4759), non-coding RNA [NR_003967]		NR_003967	Mm.461779	209380	86.5577	782.508	6.22985	8.58634	85.9824	85.5887	88.102	775.622	797.915	773.988	6.19753	6.22519	6.26681	8.58911	8.61415	8.55575
A_55_P2134277	9.30671e-08	1.44137e-06	3.56698	up	AF296418	chr12:115921059-115921000	Igh-VJ558	Mus musculus clone J558.B1 immunoglobulin heavy chain variable region mRNA, partial cds. [AF296418]			Mm.390523	16061	59.8032	352.326	5.61158	7.44628	60.2378	61.1423	58.0295	346.893	355.018	355.067	5.60497	5.64959	5.58017	7.44191	7.45104	7.44589
A_52_P429450	9.31898e-08	1.44196e-06	5.78124	up	NM_008694	chr9:110324266-110324814	Ngp	Mus musculus neutrophilic granule protein (Ngp), mRNA [NM_008694]	GO:0008150|GO:0003674|GO:0005576|GO:0031410	NM_008694	Mm.236225	18054	113.037	1183.39	6.6697	9.20108	115.034	114.752	109.324	1198.2	1173.47	1178.5	6.67694	6.70271	6.62946	9.23782	9.18474	9.18069
A_52_P344152	9.37641e-08	1.44646e-06	3.26103	up	AF528078	chr11:3233674-3233733	Pik3ip1	phosphoinositide-3-kinase interacting protein 1 [Source:MGI Symbol;Acc:MGI:1917016] [ENSMUST00000139139]	GO:0016020|GO:0043553|GO:0016021|GO:0014067		Mm.390323	216505	661.6	4113.88	9.43238	11.1377	666.521	663.093	655.186	4015.64	4134.26	4191.74	9.41265	9.46185	9.42264	11.1148	11.1448	11.1536
A_55_P1998937	9.3783e-08	1.44646e-06	2.24241	up	NM_177635	chr17:36685754-36685813	H2-M11	Mus musculus histocompatibility 2, M region locus 11 (H2-M11), mRNA [NM_177635]	GO:0002474|GO:0005886|GO:0042605|GO:0005102	NM_177635	Mm.246582	224754	230.974	999.818	7.78853	8.95358	231.93	226.629	234.362	983.833	1009	1006.62	7.77208	7.78139	7.81211	8.94924	8.96326	8.94825
A_52_P112591	9.49182e-08	1.45978e-06	4.08611	up	U07662	chr14:54841802-54842701		T cell receptor alpha constant [Source:MGI Symbol;Acc:MGI:4439838] [ENSMUST00000103740]			Mm.213248		4120.23	29124	12.2606	14.2913	4160.9	4081.65	4118.15	28736.6	29337.8	29297.5	12.2472	12.2716	12.2629	14.2484	14.3176	14.3079
A_51_P347961	9.68287e-08	1.47452e-06	2.8595	up	NM_023409	chr12:86098006-86097947	Npc2	Mus musculus Niemann Pick type C2 (Npc2), mRNA [NM_023409]	GO:0042632|GO:0006629|GO:0033344|GO:0005783|GO:0005623|GO:0005576|GO:0030301|GO:0005764|GO:0005622|GO:0015485|GO:0019899|GO:0008202|GO:0032367|GO:0008203|GO:0032366	NM_023409	Mm.282556	67963	5732.91	28152	12.7104	14.2262	5952.65	5563.57	5682.51	28123.2	28171.3	28161.6	12.7395	12.6889	12.7028	14.2123	14.2401	14.2261
A_66_P138212	9.71491e-08	1.47452e-06	2.72719	up	NM_033374	chr11:34503249-34502033	Dock2	Mus musculus dedicator of cyto-kinesis 2 (Dock2), mRNA [NM_033374]	GO:0035022|GO:0007264|GO:0046633|GO:0046631|GO:0032855|GO:0005085|GO:0005737|GO:0042608|GO:0050766|GO:0006935|GO:0042098|GO:0007010|GO:0005856|GO:0030675|GO:0030676|GO:0001771|GO:0045059|GO:0042110|GO:0050790|GO:0044351|GO:0016020|GO:0001768|GO:0045060|GO:0002277|GO:0001766	NM_033374	Mm.380679	94176	118.794	598.392	6.74867	8.19608	118.383	120.379	117.621	587.867	598.143	609.166	6.72107	6.77259	6.75235	8.18611	8.19387	8.20827
A_55_P1961049	9.77785e-08	1.47669e-06	3.23355	up	NM_176976	chr9:15157405-15157346	5830418K08Rik	Mus musculus RIKEN cDNA 5830418K08 gene (5830418K08Rik), mRNA [NM_176976]	GO:0008150|GO:0003674|GO:0005813|GO:0005737|GO:0005856	NM_176976	Mm.218317	319675	78.217	440.234	6.06315	7.75626	79.7471	78.9246	75.9792	438.109	440.962	441.632	6.07314	6.08811	6.02819	7.76874	7.75301	7.74703
A_51_P328133	9.88522e-08	1.4861e-06	2.25948	up	NM_028923	chr2:29806136-29806195	Gle1	Mus musculus GLE1 RNA export mediator (yeast) (Gle1), mRNA [NM_028923]	GO:0003674|GO:0005737|GO:0016973|GO:0005643|GO:0006810|GO:0005634|GO:0051028|GO:0005575|GO:0015031	NM_028923	Mm.275121	74412	321.287	1401.89	8.2961	9.4721	329.468	313.436	320.958	1398.3	1394.72	1412.65	8.31464	8.27413	8.29955	9.4837	9.46273	9.46986
A_66_P113188	9.90306e-08	1.48744e-06	2.24809	up	EU568202	chr12:115717476-115717417		Mus musculus clone H122 monoclonal autoantibody heavy chain variable region mRNA, partial cds. [EU568202]			Mm.436243		229.054	991.507	7.77514	8.94384	235.446	226.072	225.643	986.307	991.721	996.494	7.79458	7.77783	7.75301	8.95415	8.9418	8.93558
A_55_P2094964	9.91366e-08	1.48744e-06	2.42972	up	XM_003084619	chr4:133522891-133522385	Gm7931	PREDICTED: Mus musculus predicted pseudogene 7931 (Gm7931), mRNA [XM_003084619]		XM_003084619		100503799	445.556	2141.04	8.81958	10.1004	449.298	442.813	444.556	2130.41	2115.75	2176.96	8.80726	8.8366	8.81487	10.1116	10.0772	10.1123
A_55_P2102936	9.9224e-08	1.48744e-06	3.73315	up	NM_001033225	chr4:33332947-33332888	Pnrc1	Mus musculus proline-rich nuclear receptor coactivator 1 (Pnrc1), mRNA [NM_001033225]	GO:0008150|GO:0003674|GO:0005575	NM_001033225	Mm.27769	108767	13281.2	63242.5	13.9993	15.8997	13374.6	13329.1	13140.1	63632.2	62675.1	63420.1	13.9855	14.0239	13.9884	15.8666	15.9054	15.927
A_55_P1953608	1.00063e-07	1.49849e-06	2.58842	up		chr3:034082932-034082991							480.665	2464.26	8.93983	10.3119	486.487	478.25	477.259	2449.04	2495.43	2448.32	8.93822	8.95534	8.92593	10.3185	10.3305	10.2867
A_55_P2011490	1.00104e-07	1.49849e-06	2.6857	up	XM_003945350	chr17:47153727-47153669		predicted gene 16494 [Source:MGI Symbol;Acc:MGI:3641930] [ENSMUST00000165525]		XM_003945350			1409.12	7421.61	10.6351	12.0604	1433.81	1399.06	1394.5	7297.28	7530.8	7436.75	10.6344	10.6469	10.624	12.0411	12.0895	12.0506
A_55_P1985788	1.00681e-07	1.50285e-06	2.24331	up	NM_198092	chr9:43903649-43903708	Usp2	Mus musculus ubiquitin specific peptidase 2 (Usp2), transcript variant 3, mRNA [NM_198092]	GO:0006511|GO:0048471|GO:0005813|GO:0016579|GO:0030332|GO:0050821|GO:0005634|GO:0000122|GO:0048642|GO:0048643|GO:0046872|GO:0042802|GO:0045931|GO:0005737|GO:0007049|GO:0007517|GO:0016787|GO:0006508|GO:0008233|GO:0004221|GO:0008234|GO:0005938|GO:0031625	NM_198092	Mm.272770	53376	120.91	503.817	6.77966	7.94528	122.272	119.989	120.468	489.701	511.533	510.216	6.77547	6.76816	6.79534	7.9262	7.9624	7.94725
A_51_P504314	1.01734e-07	1.51428e-06	3.12115	up	NM_025845	chr3:108708129-108708070	Prpf38b	Mus musculus PRP38 pre-mRNA processing factor 38 (yeast) domain containing B (Prpf38b), mRNA [NM_025845]	GO:0008380|GO:0006397|GO:0008150|GO:0003674|GO:0005681|GO:0005634|GO:0005575	NM_025845	Mm.51049	66921	329.15	1979.72	8.33781	9.97989	331.109	323.638	332.702	1915.71	1994.21	2029.23	8.32477	8.33139	8.35728	9.94893	9.98906	10.0017
A_55_P1952714	1.01899e-07	1.51566e-06	2.21251	up	NM_183285	chr11:115290659-115290718	Kctd2	Mus musculus potassium channel tetramerisation domain containing 2 (Kctd2), mRNA [NM_183285]	GO:0008150|GO:0003674|GO:0006810|GO:0051260|GO:0005575|GO:0006811	NM_183285	Mm.276299	70382	72.0988	268.719	5.92802	7.0737	73.9778	71.1613	71.1571	266.691	270.578	268.887	5.94641	5.92006	5.91759	7.08325	7.08272	7.05515
A_51_P459108	1.02437e-07	1.51849e-06	3.6813	up	NM_013754	chr19:29395909-29395850	Insl6	Mus musculus insulin-like 6 (Insl6), mRNA [NM_013754]	GO:0009566|GO:0043066|GO:0005179|GO:0007286|GO:0005576|GO:0030317|GO:0007283|GO:0008584	NM_013754	Mm.306511	27356	1190.19	8329.08	10.3684	12.2486	1229.83	1140.18	1200.55	8184.23	8282.22	8520.79	10.3908	10.333	10.3813	12.2321	12.242	12.2716
A_55_P2121231	1.02757e-07	1.51849e-06	2.37755	up	NM_027707	chr15:8243242-8243183	Nipbl	Mus musculus Nipped-B homolog (Drosophila) (Nipbl), transcript variant a, mRNA [NM_027707]	GO:0035136|GO:0042826|GO:0070087|GO:0007605|GO:0071481|GO:0048592|GO:0005634|GO:0048703|GO:0048701|GO:0045778|GO:0007507|GO:0035261|GO:0048589|GO:0045444|GO:0040018|GO:0042471|GO:0042634|GO:0000122|GO:0032116|GO:0008022|GO:0006974|GO:0003151|GO:0045995|GO:0007049|GO:0003007|GO:0047485|GO:0060325|GO:0050890|GO:0048557|GO:0031065|GO:0007420|GO:0036033|GO:0061038|GO:0048638|GO:0019827|GO:0003682|GO:…	NM_027707	Mm.240329	71175	430.33	2026.11	8.76722	10.0167	432.124	429.135	429.732	1992.45	2032.33	2053.55	8.74533	8.79019	8.76614	10.0046	10.0227	10.0227
A_51_P232858	1.02778e-07	1.51849e-06	2.06142	up	NM_025974	chr9:120483689-120483748	Rpl14	Mus musculus ribosomal protein L14 (Rpl14), mRNA [NM_025974]	GO:0005622|GO:0003674|GO:0005737|GO:0003735|GO:0030529|GO:0006364|GO:0005840|GO:0042273|GO:0022625|GO:0006412	NM_025974	Mm.289810	67115	612.041	2539.74	9.31333	10.357	618.494	609.728	607.902	2515.58	2551.46	2552.17	9.30319	9.3368	9.3	10.3582	10.3597	10.353
A_66_P130027	1.03172e-07	1.52091e-06	3.16109	up	NM_001115130	chr9:30874262-30874321	Zbtb44	Mus musculus zinc finger and BTB domain containing 44 (Zbtb44), transcript variant a, mRNA [NM_001115130]	GO:0008150|GO:0006355|GO:0005634|GO:0003676|GO:0003677|GO:0046872|GO:0006351	NM_001115130	Mm.239355	235132	148.785	883.072	7.10716	8.76759	154.087	145.521	146.747	873.671	882.474	893.072	7.14483	7.08588	7.09077	8.7703	8.76319	8.76927
A_55_P2012171	1.03414e-07	1.52091e-06	4.80918	up	NM_026470	chr4:111447424-111447483	Spata6	Mus musculus spermatogenesis associated 6 (Spata6), mRNA [NM_026470]	GO:0008150|GO:0003674|GO:0007275|GO:0005576|GO:0007283|GO:0005575|GO:0030154	NM_026470	Mm.275526	67946	40.9949	308.777	4.99564	7.26143	40.6815	40.7762	41.527	302.414	314.689	309.227	4.97523	4.96941	5.04228	7.2529	7.28381	7.24758
A_51_P150120	1.03516e-07	1.52091e-06	2.752	up	NM_174995	chr3:51486449-51486508	Mgst2	Mus musculus microsomal glutathione S-transferase 2 (Mgst2), mRNA [NM_174995]	GO:0004602|GO:0019370|GO:0005737|GO:0005886|GO:0005783|GO:0006750|GO:0005635|GO:0004464|GO:0004364|GO:0016740|GO:0055114|GO:0043231	NM_174995	Mm.24679	211666	2118.41	11311.5	11.2672	12.7277	2175.77	2051.94	2127.51	11316	11224.3	11394.1	11.2889	11.2371	11.2758	12.7382	12.7166	12.7283
A_55_P2109633	1.03675e-07	1.52091e-06	3.3634	up	NM_009331	chr11:52066797-52066738	Tcf7	Mus musculus transcription factor 7, T cell specific (Tcf7), mRNA [NM_009331]	GO:0005667|GO:0006355|GO:0003700|GO:0044212|GO:0006357|GO:0008013|GO:0033153|GO:0046632|GO:0048699|GO:0044336|GO:0005634|GO:0003677|GO:0006351|GO:0043565|GO:0048557|GO:0007420|GO:0048619|GO:0042127|GO:0003682|GO:0030538|GO:0021915|GO:0071353|GO:0016055	NM_009331	Mm.31630	21414	2414.9	15519.1	11.4624	13.2124	2510.75	2317.81	2416.13	15561.6	15535.2	15460.7	11.4946	11.4277	11.4651	13.215	13.22	13.2021
A_55_P1975670	1.03676e-07	1.52091e-06	2.24255	up	NM_001037746	chr12:58340795-58340854	Prps1l3	Mus musculus phosphoribosyl pyrophosphate synthetase 1-like 3 (Prps1l3), mRNA [NM_001037746]	GO:0005575	NM_001037746	Mm.268180	328099	1059.24	4715.93	10.1863	11.3514	1070.92	1059.97	1046.83	4640.8	4741.4	4765.6	10.176	10.211	10.1718	11.3416	11.356	11.3565
A_51_P377948	1.03797e-07	1.52091e-06	2.52025	up	NM_174960	chr6:48627839-48627898	Gimap9	Mus musculus GTPase, IMAP family member 9 (Gimap9), mRNA [NM_174960]	GO:0008150|GO:0003674|GO:0005575	NM_174960	Mm.116971	317758	1281.17	6426.38	10.485	11.8186	1301.88	1251.41	1290.23	6266.27	6492.88	6520	10.4801	10.4749	10.5	11.7924	11.8351	11.8282
A_52_P239787	1.05345e-07	1.53541e-06	2.34467	up	NM_145944	chr14:66484848-66484907	Ccdc25	Mus musculus coiled-coil domain containing 25 (Ccdc25), mRNA [NM_145944]	GO:0008150|GO:0003674|GO:0005575	NM_145944	Mm.214576	67179	288.9	1300.19	8.12644	9.35582	295.17	282.207	289.321	1273.64	1309.36	1317.58	8.14177	8.10288	8.13466	9.34099	9.36594	9.36053
A_55_P2089488	1.05798e-07	1.53541e-06	3.69991	up	NM_001039710	chr1:55129329-55129388	Coq10b	Mus musculus coenzyme Q10 homolog B (S. cerevisiae) (Coq10b), transcript variant 1, mRNA [NM_001039710]	GO:0005739|GO:0008150|GO:0003674|GO:0016020|GO:0005743	NM_001039710	Mm.281019	67876	402.63	2834.58	8.66008	10.5476	405.278	398.609	404.004	2744.48	2891.12	2868.14	8.64568	8.66398	8.67059	10.5102	10.5805	10.552
A_52_P208600	1.05858e-07	1.53541e-06	2.49643	up	NM_194339	chr6:118339283-118338917	Bms1	Mus musculus BMS1 homolog, ribosome assembly protein (yeast) (Bms1), mRNA [NM_194339]	GO:0008150|GO:0003674|GO:0000166|GO:0005730|GO:0005634|GO:0005525	NM_194339	Mm.25269	213895	401.763	1971.92	8.65563	9.97549	410.791	391.056	403.442	1925.54	1999.84	1990.39	8.66596	8.63423	8.66668	9.95835	9.9955	9.97263
A_52_P577384	1.05919e-07	1.53541e-06	3.34721	up	NM_010531	chr7:109164159-109164100	Il18bp	Mus musculus interleukin 18 binding protein (Il18bp), mRNA [NM_010531]	GO:0042088|GO:0005576|GO:0005615|GO:0042007	NM_010531	Mm.422756	16068	221.472	1397.78	7.7228	9.46576	230.364	215.699	218.353	1376.77	1403.98	1412.58	7.76135	7.70385	7.70319	9.4546	9.47312	9.46955
A_51_P106059	1.07198e-07	1.54512e-06	2.27533	up	NM_009423	chr11:77972972-77972913	Traf4	Mus musculus TNF receptor associated factor 4 (Traf4), mRNA [NM_009423]	GO:0004842|GO:0090073|GO:0030054|GO:0016567|GO:0019901|GO:0005886|GO:0007585|GO:0050699|GO:0030323|GO:0046330|GO:0006915|GO:0042981|GO:0031996|GO:0005634|GO:0007275|GO:0046872|GO:0007165|GO:0005737|GO:0016020|GO:0045860|GO:0008270|GO:0005923|GO:0005856|GO:0031625	NM_009423	Mm.390418	22032	580.675	2636.56	9.23232	10.4184	588.302	578.72	575.003	2623.97	2634.54	2651.16	9.22303	9.25599	9.21794	10.4312	10.4159	10.4081
A_51_P100327	1.07309e-07	1.54512e-06	2.60976	up	NM_013683	chr17:34330854-34330913	Tap1	Mus musculus transporter 1, ATP-binding cassette, sub-family B (MDR/TAP) (Tap1), transcript variant 1, mRNA [NM_013683]	GO:0005215|GO:0042825|GO:0042288|GO:0006200|GO:0005886|GO:0005783|GO:0042626|GO:0030176|GO:0015031|GO:0042803|GO:0043231|GO:0005739|GO:0046967|GO:0015833|GO:0000166|GO:0019885|GO:0042605|GO:0006810|GO:0015197|GO:0016887|GO:0015421|GO:0042270|GO:0017111|GO:0019060|GO:0046982|GO:0035672|GO:0046980|GO:0043657|GO:0006952|GO:0005576|GO:0055085|GO:0005524|GO:0043531|GO:0016020|GO:0001916|GO:0016021|GO:…	NM_013683	Mm.482076	21354	664.509	3407.99	9.44248	10.8264	676.309	663.97	653.247	3408.75	3393.91	3421.3	9.44364	9.46454	9.41926	10.8448	10.8172	10.8172
A_52_P562158	1.07333e-07	1.54512e-06	3.3849	up	AF296435	chr12:117072312-117072253	Igh-VJ558	Mus musculus clone J558.B18 immunoglobulin heavy chain variable region mRNA, partial cds. [AF296435]			Mm.305376	16061	33.0312	164.371	4.64391	6.40302	33.8165	33.2793	31.9978	163.272	161.695	168.144	4.67197	4.63709	4.62267	6.42032	6.375	6.41374
A_55_P2133895	1.07419e-07	1.5453e-06	3.31101	up	NM_019868	chrX:131140864-131140923	Hnrnph2	Mus musculus heterogeneous nuclear ribonucleoprotein H2 (Hnrnph2), mRNA [NM_019868]	GO:0008150|GO:0003674|GO:0005737|GO:0000166|GO:0030529|GO:0003723|GO:0005634|GO:0015629|GO:0003676	NM_019868	Mm.315909	56258	1279.59	8127.45	10.4854	12.2127	1315.85	1268.42	1254.52	7970.13	8228.33	8183.88	10.5022	10.4978	10.4562	12.1879	12.2347	12.2154
A_55_P2142724	1.07852e-07	1.5473e-06	2.62446	up		chr14:054010767-054010826							426.779	2199.13	8.75358	10.1456	435.092	425.657	419.589	2200.56	2194.95	2201.89	8.75749	8.77476	8.7285	10.1626	10.141	10.1331
A_55_P2101413	1.083e-07	1.55176e-06	6.08555	up	M16678	chr14:53412323-53412382		T cell receptor alpha variable 9D-1 [Source:MGI Symbol;Acc:MGI:3650631] [ENSMUST00000178426]			Mm.425913		134.728	1477.78	6.95258	9.55797	140.586	133.472	130.127	1482.09	1468.83	1482.42	7.00349	6.9466	6.90766	9.58125	9.54918	9.54348
A_55_P1999805	1.08814e-07	1.5558e-06	2.18681	up		chrX:066858124-066858065							1041.12	4523.7	10.159	11.2878	1059.99	1019.4	1043.98	4512.15	4462.79	4596.16	10.1597	10.1533	10.164	11.2977	11.2626	11.3031
A_55_P2085012	1.09305e-07	1.55707e-06	4.82628	up		chr5:105588579-105588520							485.223	4344.98	8.95266	11.2236	507.069	461.885	486.715	4340.54	4329.52	4364.89	8.99345	8.90432	8.96021	11.2326	11.2189	11.2193
A_55_P2148323	1.09376e-07	1.55707e-06	2.35371	up	NM_172403	chr11:58694732-58694791	2810021J22Rik	Mus musculus RIKEN cDNA 2810021J22 gene (2810021J22Rik), mRNA [NM_172403]	GO:0008150|GO:0003674|GO:0005575|GO:0046872	NM_172403	Mm.32118	69944	33.3721	113.098	4.66174	5.89667	33.759	33.8518	32.5054	112.097	114.812	112.384	4.66585	4.66729	4.65207	5.90778	5.91244	5.86979
A_55_P1979118	1.11456e-07	1.57851e-06	4.6991	up	U07879	chr14:53471413-53471472		T cell receptor alpha variable 13D-1 [Source:MGI Symbol;Acc:MGI:3652171] [ENSMUST00000103588]			Mm.425917		99.5487	840.243	6.45581	8.68819	98.6414	98.3224	101.682	840.805	836.597	843.326	6.41374	6.45409	6.4996	8.70365	8.67668	8.68425
A_51_P285206	1.11603e-07	1.57851e-06	2.3084	up	NM_013487	chr9:44794171-44794402	Cd3d	Mus musculus CD3 antigen, delta polypeptide (Cd3d), mRNA [NM_013487]	GO:0005515|GO:0042110|GO:0042105|GO:0006461|GO:0046982|GO:0016020|GO:0042101|GO:0016021|GO:0045059|GO:0007166|GO:0004888	NM_013487	Mm.4527	12500	7374.66	29510.6	13.1157	14.3225	7612.88	7263	7248.11	30010.1	29156.3	29365.5	13.1347	13.1144	13.0978	14.3408	14.3113	14.3155
A_55_P2023235	1.12298e-07	1.58301e-06	2.29769	up	NM_007999	chr19:10273734-10273675	Fen1	Mus musculus flap structure specific endonuclease 1 (Fen1), transcript variant 1, mRNA [NM_007999]	GO:0030145|GO:0008409|GO:0000287|GO:0090305|GO:0016788|GO:0005634|GO:0003824|GO:0003677|GO:0046872|GO:0006974|GO:0005739|GO:0006260|GO:0004518|GO:0004527|GO:0004519|GO:0006281|GO:0016787|GO:0004523|GO:0048256|GO:0007613|GO:0043137|GO:0017108	NM_007999	Mm.2952	14156	1643.66	7447.74	10.866	12.0661	1648.92	1643.36	1638.7	7451.95	7386.18	7505.08	10.8453	10.8878	10.8648	12.0766	12.0534	12.0685
A_55_P2058023	1.12537e-07	1.58531e-06	2.08189	up	U18569	chr6:69494414-69494355		Mus musculus immunoglobulin kappa light chain, variable region mRNA, clone BALB/c-26, partial cds. [U18569]			Mm.489584		866.147	3638.26	9.87552	10.9334	877.505	846.502	874.435	3607.41	3605.76	3701.61	9.87464	9.85876	9.89316	10.9359	10.9196	10.9448
A_51_P478311	1.12773e-07	1.5857e-06	2.34808	up	NM_133787	chr3:69547459-69547518	Nmd3	Mus musculus NMD3 homolog (S. cerevisiae) (Nmd3), mRNA [NM_133787]	GO:0005737|GO:0006810|GO:0005730|GO:0043023|GO:0005634|GO:0015031|GO:0000055	NM_133787	Mm.21062	97112	402.987	1870.8	8.66176	9.89324	401.822	401.062	406.078	1846.08	1869.63	1896.7	8.63343	8.67516	8.67668	9.88947	9.89177	9.89847
A_55_P2123466	1.12977e-07	1.5857e-06	4.28777	up	NM_008466	chr14:61986530-61986471	Kpna3	Mus musculus karyopherin (importin) alpha 3 (Kpna3), mRNA [NM_008466]	GO:0005737|GO:0008565|GO:0006810|GO:0005634|GO:0015031|GO:0008022|GO:0006606	NM_008466	Mm.25548	16648	167.401	1333.43	7.29139	9.39161	173.759	161.697	166.747	1330.24	1331.78	1338.27	7.33362	7.2501	7.29043	9.40064	9.39041	9.38379
A_51_P398878	1.13092e-07	1.5857e-06	2.48949	up	NM_030724	chr1:169156298-169156239	Uck2	Mus musculus uridine-cytidine kinase 2 (Uck2), mRNA [NM_030724]	GO:0005515|GO:0004849|GO:0019206|GO:0005524|GO:0009165|GO:0005829|GO:0043231|GO:0016310|GO:0000166|GO:0016301|GO:0008152|GO:0016773|GO:0016740	NM_030724	Mm.280895	80914	2308.17	11221.6	11.3978	12.7137	2365.38	2267.94	2291.19	11299.7	11244.1	11120.9	11.4091	11.3941	11.3902	12.7349	12.7196	12.6864
A_55_P1988571	1.13554e-07	1.58827e-06	5.47005	up	X63928	chr14:54081279-54081338		T cell receptor alpha variable 7-4 [Source:MGI Symbol;Acc:MGI:3649611] [ENSMUST00000181728]			Mm.425889		110.73	1095.26	6.63341	9.08496	110.3	112.622	109.269	1053.89	1110.93	1120.94	6.60212	6.67061	6.62749	9.04362	9.10658	9.10469
A_55_P1959994	1.14091e-07	1.59228e-06	2.50243	up	NM_152823	chr17:48607944-48608003	Unc5cl	Mus musculus unc-5 homolog C (C. elegans)-like (Unc5cl), mRNA [NM_152823]	GO:0008150|GO:0007165|GO:0003674|GO:0005737|GO:0016020|GO:0016021|GO:0005575	NM_152823	Mm.311629	76589	129.866	605.301	6.89171	8.21504	133.224	127.54	128.834	596.912	612.328	606.661	6.91404	6.86765	6.89343	8.21343	8.22936	8.20233
A_55_P2039110	1.14879e-07	1.59797e-06	2.34269	up	AK167184	chrM:4670-4729	ND2	mitochondrially encoded NADH dehydrogenase 2 [Source:MGI Symbol;Acc:MGI:102500] [ENSMUST00000082396]	GO:0019901|GO:0070469|GO:0072593|GO:0005743|GO:0014069|GO:0005739|GO:0016020|GO:0035255|GO:0006810|GO:0016491|GO:0016021|GO:0008137|GO:0055114		Mm.473834	17717	21857.7	69257.8	14.8513	16.0795	22606.1	21402.6	21564.2	71851.5	67788.2	68133.8	14.8711	14.8447	14.8381	16.1	16.0673	16.0711
A_55_P2133562	1.16549e-07	1.6095e-06	2.05398	up	NM_001110129	chr4:118978954-118978895	Ppih	Mus musculus peptidyl prolyl isomerase H (Ppih), transcript variant 2, mRNA [NM_001110129]	GO:0000413|GO:0006397|GO:0008380|GO:0003755|GO:0005634|GO:0071001|GO:0005737|GO:0016607|GO:0006457|GO:0043021|GO:0005681|GO:0016853|GO:0046540|GO:0045070	NM_001110129	Mm.371613	66101	54.394	175.09	5.4507	6.48913	54.5498	54.9015	53.7306	174.402	176.042	174.827	5.44242	5.46356	5.44613	6.50385	6.49446	6.46908
A_51_P428086	1.17387e-07	1.61708e-06	2.50543	up	NM_009260	chr11:30007757-30007698	Sptbn1	Mus musculus spectrin beta, non-erythrocytic 1 (Sptbn1), transcript variant 2, mRNA [NM_009260]	GO:0005515|GO:0007009|GO:0005516|GO:0008091|GO:0005886|GO:0043001|GO:0072661|GO:0032437|GO:0005634|GO:0032403|GO:0005622|GO:0005737|GO:0005543|GO:0030673|GO:0005856|GO:0000281|GO:0071709|GO:0005730|GO:0005623|GO:0030506|GO:0003779|GO:0031430|GO:0051693|GO:0007182|GO:0043234|GO:0016020|GO:0007184|GO:0005200|GO:0030863	NM_009260	Mm.123110	20742	982.461	4898.95	10.0751	11.4002	992.292	952.742	1002.35	4853.35	4906.5	4937.01	10.0663	10.0535	10.1055	11.4009	11.3983	11.4014
A_55_P2401403	1.17703e-07	1.61905e-06	2.05172	up	AK081287	chr11:23637110-23637051	C030046G05	Mus musculus adult male corpus striatum cDNA, RIKEN full-length enriched library, clone:C030046G05 product:unclassifiable, full insert sequence. [AK081287]			Mm.30811	327885	4771.63	18134.8	12.454	13.4909	4831.83	4751.83	4731.23	17877.9	18267.9	18258.6	12.4504	12.4687	12.443	13.4724	13.5046	13.4957
A_66_P114582	1.17868e-07	1.62026e-06	3.83187	up	AF303844	chr12:116432095-116432036		Mus musculus clone J558.13 immunoglobulin heavy chain variable region mRNA, partial cds. [AF303844]			Mm.313452		46.4934	280.108	5.19156	7.12961	46.0942	46.8383	46.5477	283.797	277.938	278.589	5.16683	5.1939	5.21396	7.16555	7.11885	7.10444
A_55_P2029558	1.18374e-07	1.62298e-06	2.5469	up	NM_007420	chr18:62338415-62338356	Adrb2	Mus musculus adrenergic receptor, beta 2 (Adrb2), mRNA [NM_007420]	GO:0005515|GO:0045453|GO:0004941|GO:0009409|GO:0002024|GO:0043268|GO:0002025|GO:0015459|GO:0006940|GO:0032403|GO:0042803|GO:0043231|GO:0010765|GO:0051924|GO:0031398|GO:0045823|GO:0004935|GO:0030501|GO:0004930|GO:0008179|GO:0035240|GO:0006898|GO:0002032|GO:0043235|GO:0001993|GO:0048633|GO:0007186|GO:0050873|GO:0005887|GO:0042060|GO:0002028|GO:0007189|GO:0035811|GO:0019899|GO:0051930|GO:0030424|GO:…	NM_007420	Mm.5598	11555	280.67	1365.76	8.07968	9.42842	281.823	280.611	279.577	1335.12	1366.83	1395.31	8.06851	8.0955	8.07502	9.40421	9.42917	9.45188
A_52_P622694	1.19429e-07	1.62896e-06	2.56155	up	NM_029475	chr2:120976923-120978200	Adal	Mus musculus adenosine deaminase-like (Adal), mRNA [NM_029475]	GO:0009168|GO:0016787|GO:0004000|GO:0006154|GO:0046103|GO:0019239|GO:0005575|GO:0046872|GO:0009117	NM_029475	Mm.384805	75894	42.5363	165.041	5.05234	6.40936	42.597	43.4133	41.5986	165.193	162.8	167.128	5.0444	5.0671	5.04553	6.43567	6.38637	6.40604
A_55_P2121595	1.19806e-07	1.63197e-06	5.76181	up	AF397911	chr10:42654097-42654156	Scml4	Mus musculus clone IMAGE:583715 mRNA sequence. [AF397911]	GO:0008150|GO:0003674|GO:0006355|GO:0005634|GO:0005575|GO:0003677|GO:0006351		Mm.98731	268297	156.304	1634.4	7.18024	9.70677	160.648	148.655	159.611	1599.75	1651.51	1651.94	7.20169	7.12262	7.21642	9.69349	9.71896	9.70785
A_55_P2087292	1.20702e-07	1.63581e-06	2.35149	up	AY056584	chr6:41069137-41069196		Mus musculus T cell receptor beta chain (TCRBVbeta5.1/Jbeta1.5) mRNA, partial cds. [AY056584]			Mm.123831		167.903	750.921	7.29462	8.5282	167.955	166.832	168.922	730.252	763.871	758.638	7.27592	7.29852	7.30943	8.50895	8.54664	8.52899
A_52_P27244	1.20987e-07	1.63745e-06	3.79214	up	NM_207692	chr11:49677113-49677172	Mapk9	Mus musculus mitogen-activated protein kinase 9 (Mapk9), transcript variant alpha2, mRNA [NM_207692]	GO:0005515|GO:2001235|GO:0005634|GO:0001836|GO:0031175|GO:0010770|GO:0045429|GO:0005829|GO:0046328|GO:0005739|GO:0004705|GO:0034644|GO:0005737|GO:0000166|GO:0016301|GO:0031396|GO:0016772|GO:0004707|GO:0023014|GO:0043065|GO:0006919|GO:0010744|GO:0042493|GO:0031394|GO:0007254|GO:0031435|GO:0032722|GO:0007258|GO:0005524|GO:0008656|GO:0043280|GO:0010628|GO:0016310|GO:0004672|GO:0004674|GO:0001934|GO:…	NM_207692	Mm.68933	26420	199.975	1421.85	7.57131	9.49432	205.561	200.046	194.32	1419.17	1428.51	1417.86	7.58962	7.59443	7.52988	9.50749	9.5001	9.47537
A_51_P286995	1.21759e-07	1.63934e-06	2.65349	up	NM_025653	chr16:13678105-13678164	3110001I22Rik	Mus musculus RIKEN cDNA 3110001I22 gene (3110001I22Rik), mRNA [NM_025653]	GO:0008150|GO:0003674|GO:0005575	NM_025653	Mm.223689	66598	291.806	1474.76	8.14683	9.55472	290.784	290.138	294.495	1471.05	1470.92	1482.3	8.11735	8.15738	8.16576	9.56935	9.55165	9.54317
A_55_P1961499	1.22286e-07	1.64234e-06	2.43052	up	NM_001252058	chr15:74877844-74877785	Ly6c1	Mus musculus lymphocyte antigen 6 complex, locus C1 (Ly6c1), transcript variant 5, mRNA [NM_001252058]	GO:0016020|GO:0005886|GO:0031225|GO:0009897	NM_001252058	Mm.1583	17067	5731.33	24743.9	12.7124	13.9937	5781.97	5749.16	5662.85	24694.1	24731.7	24805.9	12.6966	12.7415	12.6991	13.9855	14.002	13.9935
A_55_P2000062	1.22434e-07	1.64255e-06	3.74266	up	NM_008390	chr11:53590746-53590805	Irf1	Mus musculus interferon regulatory factor 1 (Irf1), transcript variant 1, mRNA [NM_008390]	GO:0005515|GO:0010468|GO:0000790|GO:0003700|GO:0035458|GO:0007249|GO:0005634|GO:0051607|GO:0005737|GO:0045944|GO:0071375|GO:0071356|GO:0007050|GO:0032481|GO:0010942|GO:0060333|GO:0000975|GO:0032728|GO:2000564|GO:0060416|GO:0006355|GO:0006915|GO:0032825|GO:0042512|GO:0000978|GO:0003677|GO:0006351|GO:0043565|GO:0002819|GO:0045084|GO:0043374|GO:0045629|GO:0045087|GO:0071347|GO:0045627|GO:0045088|GO:…	NM_008390	Mm.105218	16362	13658.9	64282.2	14.0354	15.9395	13701.7	13795.8	13479.4	65755.6	63593.9	63497.3	14.0121	14.0804	14.0136	15.9456	15.9344	15.9384
A_51_P439857	1.22457e-07	1.64255e-06	2.53989	up	NM_030046	chr15:10379415-10379356	Dnajc21	Mus musculus DnaJ (Hsp40) homolog, subfamily C, member 21 (Dnajc21), mRNA [NM_030046]	GO:0008150|GO:0003674|GO:0005575	NM_030046	Mm.297862	78244	765.908	3827.54	9.66972	11.0145	772.547	767.151	758.027	3823.33	3814.92	3844.36	9.65793	9.69632	9.65491	11.0324	11.0042	11.0068
A_55_P2114187	1.22997e-07	1.6478e-06	2.11415	up		chr3:106100673-106100732							804.828	3424.79	9.75348	10.8336	821.193	787.003	806.288	3432.83	3420.49	3421.04	9.76104	9.74101	9.75839	10.855	10.8289	10.8167
A_66_P140976	1.23171e-07	1.64898e-06	2.45068	up	NM_025586	chr14:19100647-19100588	Rpl15	Mus musculus ribosomal protein L15 (Rpl15), mRNA [NM_025586]	GO:0005622|GO:0003735|GO:0030529|GO:0005840|GO:0022625|GO:0006412	NM_025586	Mm.2050	66480	1053.94	5164.83	10.1798	11.473	1080.28	1023.76	1057.79	5193.34	5091.01	5210.15	10.1881	10.1609	10.1904	11.4946	11.4522	11.4722
A_52_P12877	1.23375e-07	1.64909e-06	2.12134	up	NM_031165	chr9:40611142-40611201	Hspa8	Mus musculus heat shock protein 8 (Hspa8), mRNA [NM_031165]	GO:0005515|GO:0008380|GO:0043005|GO:0006200|GO:0042623|GO:0005634|GO:0005829|GO:0005622|GO:0005737|GO:0000166|GO:0006457|GO:0051726|GO:0043025|GO:0005681|GO:0070062|GO:0000974|GO:0006397|GO:0006355|GO:0009986|GO:0005730|GO:0005102|GO:0006950|GO:0005524|GO:0006351|GO:0008021|GO:0043234|GO:0061077|GO:0043531|GO:0030529|GO:0051085|GO:0051082|GO:0045892	NM_031165	Mm.290774	15481	7339.5	27711.6	13.1082	14.1931	7543.73	7207.14	7267.65	28150.9	27567.4	27416.4	13.1206	13.1001	13.1037	14.2138	14.1909	14.1747
A_55_P1998471	1.24022e-07	1.653e-06	2.5885	up	NM_001281852	chr3:90496632-90496573	S100a9	Mus musculus S100 calcium binding protein A9 (calgranulin B) (S100a9), transcript variant 1, mRNA [NM_001281852]	GO:0016209|GO:0031532|GO:0005886|GO:0030595|GO:0002523|GO:0006919|GO:0045113|GO:0030593|GO:0005509|GO:0006914|GO:0006915|GO:2001244|GO:0005576|GO:0005634|GO:0005615|GO:0046872|GO:0005737|GO:0006954|GO:0016020|GO:0006935|GO:0045087|GO:0050729|GO:0070488|GO:0005856	NM_001281852	Mm.2128	20202	10515.7	42021.6	13.6438	15.016	10582.7	10347.7	10616.8	42269.1	42081.9	41713.7	13.6209	13.6472	13.6635	14.9953	15.0319	15.0207
A_51_P298843	1.24204e-07	1.65438e-06	2.26408	up	NM_028281	chr13:55834381-55876739	Pcbd2	Mus musculus pterin 4 alpha carbinolamine dehydratase/dimerization cofactor of hepatocyte nuclear factor 1 alpha (TCF1) 2 (Pcbd2), mRNA [NM_028281]	GO:0005739|GO:0005515|GO:0051289|GO:0006729|GO:0004505|GO:0005634|GO:0045893|GO:0008124|GO:0051291|GO:0016829|GO:0055114	NM_028281	Mm.28145	72562	804.093	3633.6	9.74984	10.9288	816.066	790.255	805.959	3545.71	3656.99	3698.09	9.74625	9.74565	9.75761	10.9016	10.9408	10.9439
A_55_P2037111	1.247e-07	1.65655e-06	2.47513	up	NM_009391	chr5:129529796-129529855	Ran	Mus musculus RAN, member RAS oncogene family (Ran), mRNA [NM_009391]	GO:0005515|GO:0030036|GO:0007264|GO:0003924|GO:0005634|GO:0006606|GO:0015031|GO:0006886|GO:0032092|GO:0005737|GO:0000166|GO:0034629|GO:0006611|GO:0006810|GO:0000785|GO:0019904|GO:0005525|GO:0006913|GO:0006184|GO:0007165|GO:0043234|GO:0007049|GO:0007067|GO:0034613|GO:0019003|GO:0051301	NM_009391	Mm.297440	19384	494.503	2433.14	8.98642	10.2939	495.71	488.4	499.398	2384.84	2468.79	2445.77	8.96583	8.99273	9.00069	10.2807	10.3171	10.2839
A_55_P1978047	1.24993e-07	1.65773e-06	4.81918	up	NM_028844	chr2:112354689-112354748	Aven	Mus musculus apoptosis, caspase activation inhibitor (Aven), transcript variant 1, mRNA [NM_028844]	GO:0005622|GO:0003674|GO:0043066|GO:0016020|GO:0006915	NM_028844	Mm.315125	74268	137.963	1226.3	6.99039	9.25918	137.303	141.18	135.404	1221.24	1208.11	1249.55	6.96531	7.0374	6.96846	9.27141	9.23166	9.27445
A_55_P1964559	1.25556e-07	1.66183e-06	2.21829	up	NR_002888	chr4:147110348-147110289	Smarca5-ps	Mus musculus SWI/SNF related, matrix associated, actin depenent ragulator of chromatin, subfamily a, member 5, pseudogene (Smarca5-ps), non-coding RNA [NR_002888]		NR_002888	Mm.389595	545700	807.592	3583	9.75677	10.9062	816.081	807.431	799.264	3525.61	3574.21	3649.2	9.74676	9.77835	9.7452	10.8924	10.9041	10.9221
A_55_P2430122	1.259e-07	1.66432e-06	2.1641	up	NM_026374	chr3:90291393-90291452	Ilf2	Mus musculus interleukin enhancer binding factor 2 (Ilf2), mRNA [NM_026374]	GO:0003725|GO:0006355|GO:0003723|GO:0005730|GO:0005634|GO:0003677|GO:0005524|GO:0006351|GO:0005737|GO:0006955|GO:0030529|GO:0045893|GO:0016740	NM_026374	Mm.227258	67781	299.188	1256.78	8.1848	9.29856	305.738	295.783	296.043	1237.84	1273.43	1259.06	8.19785	8.18412	8.17242	9.29084	9.32066	9.28419
A_55_P2064652	1.27081e-07	1.67572e-06	3.0824	up	NM_001146007	chr7:111496655-111496596	Trim12c	Mus musculus tripartite motif-containing 12C (Trim12c), transcript variant 1, mRNA [NM_001146007]	GO:0005737|GO:0004842|GO:0002221|GO:0016567|GO:0005794|GO:0000932|GO:0005634|GO:0046872|GO:0042803|GO:0042802|GO:0008329	NM_001146007	Mm.425502	319236	56.3284	280.996	5.50959	7.13364	57.6942	55.7166	55.5745	278.71	275.589	288.69	5.53007	5.48635	5.51234	7.13802	7.10587	7.15703
A_55_P2148906	1.27316e-07	1.67776e-06	2.00605	up	NM_028870	chr13:54694359-54694300	Cltb	Mus musculus clathrin, light polypeptide (Lcb) (Cltb), mRNA [NM_028870]	GO:0005802|GO:0042277|GO:0060170|GO:0030132|GO:0005886|GO:0031410|GO:0006886|GO:0030118|GO:0008150|GO:0005905|GO:0016020|GO:0005198|GO:0030130|GO:0016192	NM_028870	Mm.290026	74325	504.806	2032.12	9.01639	10.0207	508.397	500.333	505.687	2034.12	2017.63	2044.62	8.99658	9.0274	9.02519	10.0344	10.0116	10.0162
A_52_P413623	1.278e-07	1.68024e-06	2.25952	up	NM_001004143	chr11:60966417-60966358	Usp22	Mus musculus ubiquitin specific peptidase 22 (Usp22), mRNA [NM_001004143]	GO:0006511|GO:0016579|GO:0004843|GO:0005634|GO:0046872|GO:0070461|GO:0030374|GO:0000124|GO:0006508|GO:0010485|GO:0016578|GO:0006355|GO:0016574|GO:0003713|GO:0006351|GO:0007049|GO:0045931|GO:0016787|GO:0043967|GO:0008270|GO:0008233|GO:0008234|GO:0004221|GO:0045893|GO:0016568	NM_001004143	Mm.30602	216825	172.218	744.5	7.3391	8.51511	172.416	169.893	174.344	727.215	748.722	757.563	7.3206	7.33529	7.36142	8.4998	8.52119	8.52435
A_55_P2029842	1.28124e-07	1.68104e-06	2.00682	up	NM_001039129	chr15:103075181-103075240	Hnrnpa1	Mus musculus heterogeneous nuclear ribonucleoprotein A1 (Hnrnpa1), transcript variant 2, mRNA [NM_001039129]	GO:0006397|GO:0008380|GO:0051170|GO:0003723|GO:0005634|GO:0071013|GO:0003676|GO:0019013|GO:0005737|GO:0000166|GO:0003697|GO:0030529|GO:0000380|GO:0006810|GO:0005654|GO:0005681|GO:0051028|GO:0045111|GO:0051168|GO:0019012	NM_001039129	Mm.237064	15382	5757.52	21065.1	12.7174	13.7223	5882.81	5611.08	5778.67	21209.1	20907	21079.2	12.7211	12.6997	12.7315	13.7373	13.7182	13.7115
A_55_P2262287	1.28757e-07	1.6827e-06	3.69329	up	AK139147	chr15:36180465-36180406	5430434G16Rik	Mus musculus 7 days neonate cerebellum cDNA, RIKEN full-length enriched library, clone:A730047B13 product:hypothetical protein, full insert sequence. [AK139147]			Mm.440854	71385	692.893	4862.51	9.50499	11.3899	711.399	673.637	693.642	4945.71	4738.94	4902.88	9.52625	9.48696	9.50176	11.4236	11.3553	11.3908
A_51_P347467	1.28898e-07	1.6827e-06	4.2716	up	NM_028276	chrX:45616154-45616213	Utp14a	Mus musculus UTP14, U3 small nucleolar ribonucleoprotein, homolog A (yeast) (Utp14a), mRNA [NM_028276]	GO:0008150|GO:0003674|GO:0042254|GO:0006364|GO:0032040|GO:0005634|GO:0005575	NM_028276	Mm.336045	72554	42.9741	287.536	5.06725	7.16203	43.981	43.0321	41.9091	275.941	287.788	298.88	5.09147	5.05497	5.05531	7.12344	7.162	7.20065
A_51_P244396	1.29169e-07	1.68425e-06	3.25015	up	L20961	chr12:115272121-115272062		Mus musculus Ig rearranged H-chain mRNA V-region, 5' end of cds. [L20961]			Mm.475073		343.085	2148.39	8.40511	10.1056	356.522	333.125	339.609	2149.08	2135.29	2160.8	8.44153	8.38311	8.3907	10.124	10.0931	10.0998
A_55_P1975355	1.2966e-07	1.68507e-06	9.37628	up	AK135037	chr13:63914872-63914813	C030010C08Rik	Mus musculus adult male olfactory brain cDNA, RIKEN full-length enriched library, clone:6430550P15 product:unclassifiable, full insert sequence. [AK135037]	GO:0005739|GO:0008150|GO:0003674		Mm.474624	77329	5	92.0269	2.37858	5.60759	5	5	5	95.4965	88.3436	92.2407	2.37763	2.37576	2.38233	5.68098	5.54746	5.59433
A_51_P100852	1.29757e-07	1.68507e-06	2.19209	up	NM_175449	chr10:33846270-33846211	Fam26f	Mus musculus family with sequence similarity 26, member F (Fam26f), mRNA [NM_175449]	GO:0008150|GO:0003674|GO:0016020|GO:0006810|GO:0016021|GO:0005575|GO:0006811	NM_175449	Mm.34479	215900	600.202	2627.74	9.28145	10.4138	607.837	598.18	594.589	2579.22	2639.82	2664.17	9.27515	9.30388	9.26531	10.399	10.4219	10.4204
A_55_P2110718	1.30302e-07	1.68855e-06	2.7893	up	NM_001252261	chr11:33056731-33056672	Npm1	Mus musculus nucleophosmin 1 (Npm1), transcript variant 3, mRNA [NM_001252261]	GO:0005515|GO:0048025|GO:0001652|GO:0032071|GO:0051259|GO:0042803|GO:0006884|GO:0005622|GO:0043523|GO:0006407|GO:0045860|GO:0051260|GO:0043023|GO:0042273|GO:0043024|GO:0042274|GO:0005856|GO:0005813|GO:0046982|GO:0019901|GO:0007569|GO:0045740|GO:0003713|GO:0006950|GO:0006334|GO:0005547|GO:0043085|GO:0030957|GO:0006281|GO:0016049|GO:0005654|GO:0051082|GO:0019899|GO:0060735|GO:0008284|GO:0008285|GO:…	NM_001252261	Mm.485384	18148	4555.27	23012.2	12.396	13.8759	4608.48	4379.3	4678.02	23184.6	22923.2	22928.9	12.3899	12.3691	12.429	13.8797	13.8797	13.8683
A_52_P18596	1.31962e-07	1.7017e-06	3.71582	up		chr2:180952318-180952377							3266.9	21990.6	11.9113	13.805	3282.59	3284.78	3233.32	21629.3	22232.6	22109.9	11.8943	11.9406	11.8992	13.7717	13.8324	13.811
A_51_P194681	1.31977e-07	1.7017e-06	2.0109	up	NM_178708	chr8:13077865-13077806	Pcid2	Mus musculus PCI domain containing 2 (Pcid2), mRNA [NM_178708]	GO:0043488|GO:0043066|GO:0045579|GO:2000117|GO:0090267|GO:0005575|GO:0048536|GO:0045893	NM_178708	Mm.103427	234069	244.511	947.017	7.86728	8.87512	251.426	240.163	241.945	950.069	943.136	947.846	7.88161	7.86397	7.85628	8.89454	8.86631	8.86452
A_55_P1984362	1.32507e-07	1.70613e-06	4.37845	up	GU599190	chr6:40998750-40998809		Mus musculus clone 115253917676512G T-cell receptor beta chain (TCRB) mRNA, partial cds. [GU599190]			Mm.333013		54.9177	393.344	5.46537	7.59579	56.3018	54.6996	53.7518	401.839	385.774	392.419	5.49181	5.45762	5.44669	7.63972	7.56903	7.57862
A_55_P2178349	1.3256e-07	1.70613e-06	2.55912	up	NM_011739	chr12:21404163-21404104	Ywhaq	Mus musculus tyrosine 3-monooxygenase/tryptophan 5-monooxygenase activation protein, theta polypeptide (Ywhaq), mRNA [NM_011739]	GO:0005515|GO:0007264|GO:0019904|GO:0005623|GO:0006605|GO:0005622|GO:0071889|GO:0004497|GO:0007165|GO:0043234|GO:0005737|GO:0047485|GO:0016491|GO:0045892|GO:0070062|GO:0055114	NM_011739	Mm.289630	22630	2994.41	14865.2	11.7843	13.1399	3084.84	2945.8	2952.59	14630.5	14948.2	15016.9	11.8045	11.7807	11.7676	13.1152	13.1558	13.1487
A_52_P659258	1.32927e-07	1.70771e-06	2.27045	up	NM_172146	chr5:77347174-77347115	Ppat	Mus musculus phosphoribosyl pyrophosphate amidotransferase (Ppat), mRNA [NM_172146]	GO:0019693|GO:0009168|GO:0051536|GO:0051289|GO:0016757|GO:0006543|GO:0004044|GO:0046872|GO:0016740|GO:0006164	NM_172146	Mm.202337	231327	185.004	811.261	7.45593	8.63891	189.517	179.55	185.943	800.72	813.214	819.85	7.47226	7.42716	7.46838	8.63948	8.63908	8.63818
A_51_P194609	1.32999e-07	1.70771e-06	4.56831	up	NM_178372	chr17:25436942-25437001	Prss34	Mus musculus protease, serine, 34 (Prss34), mRNA [NM_178372]	GO:0031012|GO:0019800|GO:0016787|GO:0006508|GO:0008236|GO:0008233|GO:0005539|GO:0008201|GO:0005615	NM_178372	Mm.127166	328780	98.7115	808.39	6.44248	8.63414	99.9655	97.2908	98.8783	826.873	795.978	802.317	6.43946	6.43624	6.45175	8.6868	8.60837	8.60727
A_52_P298548	1.33548e-07	1.71162e-06	2.91287	up	NM_013752	chr4:15906456-15906515	Nbn	Mus musculus nibrin (Nbn), mRNA [NM_013752]	GO:0007095|GO:0007093|GO:0008284|GO:0030870|GO:0008283|GO:0005657|GO:0001832|GO:0048145|GO:0005634|GO:0006302|GO:0005622|GO:0004003|GO:0000723|GO:0050885|GO:0032508|GO:0000784|GO:0031954|GO:0033674|GO:0000781|GO:0005694|GO:0045190|GO:0035861|GO:0005730|GO:0001701|GO:0097193|GO:0006974|GO:0003684|GO:0007049|GO:0047485|GO:0006281|GO:0007126|GO:0045665|GO:0016605|GO:0000077|GO:0042405|GO:0008134	NM_013752	Mm.20866	27354	100.672	526.633	6.4727	8.01514	104.311	99.0547	98.6515	519.77	524.209	535.921	6.50614	6.46355	6.4484	8.01242	8.0037	8.0293
A_55_P2290914	1.33966e-07	1.71217e-06	3.03293	up	AK037357	chr14:54820537-54820596	Trav3n-3	Mus musculus 16 days neonate thymus cDNA, RIKEN full-length enriched library, clone:A130010C18 product:unclassifiable, full insert sequence. [AK037357]			Mm.213248	100043282	2047.96	11929.7	11.2124	12.8131	2133.32	1998.6	2011.96	11867.9	11890.2	12031.2	11.2512	11.1948	11.1913	12.8113	12.8101	12.8179
A_52_P146164	1.35422e-07	1.72468e-06	2.12562	up	NM_080560	chr10:95004411-95004963	Ube2n	Mus musculus ubiquitin-conjugating enzyme E2N (Ube2n), mRNA [NM_080560]	GO:0005515|GO:0006511|GO:0050852|GO:0004842|GO:0016567|GO:0016881|GO:0016874|GO:0005634|GO:0005524|GO:0006974|GO:0005737|GO:0051092|GO:0006281|GO:0000166	NM_080560	Mm.440187	93765	357.074	1478.72	8.47083	9.55872	359.02	349.416	362.785	1465.76	1471.56	1498.84	8.45481	8.46083	8.49686	9.56239	9.55437	9.55939
A_52_P543792	1.35577e-07	1.72468e-06	3.08679	up	NM_175143	chr9:108447203-108447262	Qrich1	Mus musculus glutamine-rich 1 (Qrich1), transcript variant 2, mRNA [NM_175143]	GO:0008150|GO:0003674|GO:0005575	NM_175143	Mm.335449	69232	301.741	1784.28	8.1977	9.82381	299.158	297.907	308.159	1746.53	1798.05	1808.27	8.16405	8.19936	8.22971	9.81172	9.83174	9.82797
A_55_P1964302	1.3559e-07	1.72468e-06	3.18146	up	NM_013898	chrX:131072743-131072684	Timm8a1	Mus musculus translocase of inner mitochondrial membrane 8A1 (Timm8a1), mRNA [NM_013898]	GO:0005739|GO:0005758|GO:0006626|GO:0008270	NM_013898	Mm.214504	30058	148.441	886.073	7.103	8.77268	148.971	150.419	145.934	873.07	895.711	889.437	7.0874	7.1409	7.08068	8.76845	8.78727	8.76234
A_55_P2140212	1.35633e-07	1.72468e-06	3.45784	up		chr18:011804314-011804255		Q3J0L9_RHOS4 (Q3J0L9) Hydrogenase maturation factor F, partial (3%) [TC1616199]					15963.8	68599	14.268	16.0579	16229.3	16011.8	15650.3	71251.2	67160.6	67385.3	14.2573	14.3038	14.2429	16.078	16.0365	16.059
A_52_P525837	1.35844e-07	1.72633e-06	2.93671	up	NM_175113	chr2:132634589-132634530	Trmt6	Mus musculus tRNA methyltransferase 6 (Trmt6), mRNA [NM_175113]	GO:0003674|GO:0006446|GO:0003743|GO:0005634|GO:0005575|GO:0008033|GO:0006413	NM_175113	Mm.34199	66926	67.8068	335.854	5.8277	7.38189	67.7188	68.8598	66.8418	336.093	336.586	334.885	5.80425	5.85645	5.82239	7.40274	7.3794	7.36355
A_52_P494622	1.37486e-07	1.73977e-06	4.79774	up	NM_013613	chr2:56960758-56960699	Nr4a2	Mus musculus nuclear receptor subfamily 4, group A, member 2 (Nr4a2), transcript variant 1, mRNA [NM_013613]	GO:0005515|GO:0010468|GO:0008344|GO:0010467|GO:0021986|GO:0003700|GO:0006366|GO:0003707|GO:0016265|GO:0005634|GO:0009791|GO:0046872|GO:0042053|GO:0042416|GO:0043576|GO:0043524|GO:0005737|GO:0042417|GO:0010035|GO:0045944|GO:0031668|GO:0030182|GO:0043401|GO:0004879|GO:0001666|GO:0006355|GO:0046982|GO:0006357|GO:0042551|GO:0021953|GO:0021952|GO:0051866|GO:0043085|GO:0003677|GO:0000979|GO:0006351|GO:…	NM_013613	Mm.3507	18227	82.3506	693.784	6.15198	8.41433	84.0384	80.0361	82.9774	697.886	682.991	700.476	6.16444	6.1106	6.1809	8.44552	8.38311	8.41437
A_66_P132322	1.38587e-07	1.74641e-06	2.45617	up	AK003285	chr19:3291006-3291065	Mrpl21	mitochondrial ribosomal protein L21 [Source:MGI Symbol;Acc:MGI:2660674] [ENSMUST00000154785]	GO:0005739|GO:0005622|GO:0008150|GO:0003674|GO:0003735|GO:0030529|GO:0003723|GO:0005840|GO:0006412		Mm.74084	353242	2527.42	11998.3	11.5252	12.8216	2615.88	2490.31	2476.08	12011	11979.8	12004.2	11.5514	11.5261	11.4981	12.8273	12.8245	12.8131
A_55_P1996751	1.39034e-07	1.74995e-06	2.76846	up		chr12:089305682-089305741							520.816	2809.62	9.06558	10.5347	534.833	504.124	523.49	2760.9	2857.57	2810.38	9.08171	9.04176	9.07328	10.522	10.5616	10.5205
A_55_P2143856	1.40086e-07	1.75792e-06	4.12368	up	M20875	chr14:54165093-54165152		Murine T-cell receptor alpha-chain mRNA, clone 6.9R.D6, 5' end. [M20875]			Mm.335673		93.4583	686.21	6.35188	8.39582	93.6821	91.5703	95.1225	691.173	680.925	686.533	6.33056	6.33297	6.39212	8.42637	8.38091	8.38017
A_52_P420216	1.40772e-07	1.7613e-06	2.2246	up	NM_030563	chr8:89384402-89384343	N4bp1	Mus musculus NEDD4 binding protein 1 (N4bp1), mRNA [NM_030563]	GO:0005515|GO:0034644|GO:0016605|GO:0005730|GO:0005634|GO:0032435|GO:0031397	NM_030563	Mm.25117	80750	222.074	952.319	7.72751	8.88106	223.938	222.321	219.964	934.472	957.162	965.323	7.71621	7.75213	7.71421	8.86667	8.88929	8.88723
A_66_P130916	1.40773e-07	1.7613e-06	2.90601	up	NM_010389	chr17:34380481-34380849	H2-Ob	Mus musculus histocompatibility 2, O region beta locus (H2-Ob), mRNA [NM_010389]	GO:0005622|GO:0016020|GO:0002504|GO:0042613|GO:0016021|GO:0005764	NM_010389	Mm.327358	15002	448.451	2558.95	8.83073	10.3698	452.304	448.953	444.098	2568.24	2560.16	2548.44	8.81739	8.86077	8.81403	10.3908	10.368	10.3505
A_55_P2185667	1.40895e-07	1.7617e-06	3.74281	up		chr7:034209004-034209063							144.206	1003.83	7.05538	8.9595	149.371	139.507	143.74	976.595	1011.91	1022.99	7.09077	7.01924	7.05612	8.93712	8.96722	8.97416
A_55_P2083416	1.40973e-07	1.7617e-06	4.05967	up	Y17471	chr14:53304032-53304091		T cell receptor alpha variable 7-2 [Source:MGI Symbol;Acc:MGI:3649607] [ENSMUST00000103636]			Mm.464376		119.4	890.415	6.75905	8.78041	124.328	117.415	116.459	875.635	892.039	903.571	6.80829	6.73588	6.73299	8.77278	8.78026	8.7882
A_51_P506674	1.41295e-07	1.76467e-06	2.36908	up	NM_001013376	chr2:3246499-3246440	Rpp38	Mus musculus ribonuclease P/MRP 38 subunit (Rpp38), mRNA [NM_001013376]	GO:0008150|GO:0003674|GO:0016787|GO:0004526|GO:0005634|GO:0005575|GO:0008033	NM_001013376	Mm.293948	227522	122.811	540.919	6.80529	8.04961	125.542	123.384	119.506	531.497	549.74	541.52	6.82494	6.81083	6.78009	8.04121	8.0654	8.04224
A_52_P25812	1.41407e-07	1.76502e-06	2.5935	up	NM_001081355	chr4:142721939-142721880	Prdm2	Mus musculus PR domain containing 2, with ZNF domain (Prdm2), transcript variant 1, mRNA [NM_001081355]	GO:0005794|GO:0005634|GO:0032355	NM_001081355	Mm.332020	110593	269.553	1338.71	8.02154	9.39644	273.676	269.96	265.024	1322.19	1320.2	1373.73	8.02443	8.03987	8.00033	9.39417	9.3759	9.41926
A_55_P1969523	1.42055e-07	1.77161e-06	2.02902	up	NM_133354	chr11:115397425-115395952	Sumo2	Mus musculus SMT3 suppressor of mif two 3 homolog 2 (yeast) (Sumo2), mRNA [NM_133354]	GO:0045944|GO:0019789|GO:0016925|GO:0016605|GO:0032436|GO:0005634|GO:0034613|GO:0045892|GO:0031625	NM_133354	Mm.29923	170930	2361.64	9476.56	11.4322	12.453	2388.32	2342.72	2353.88	9401.28	9386.02	9642.39	11.4228	11.4417	11.4321	12.4478	12.4363	12.4748
A_55_P2178818	1.42271e-07	1.77161e-06	3.72712	up	NM_001281967	chr11:46167439-46167380	Itk	Mus musculus IL2 inducible T cell kinase (Itk), transcript variant 4, mRNA [NM_001281967]	GO:0005515|GO:0050852|GO:0018108|GO:0007202|GO:0001816|GO:0001865|GO:0005524|GO:0046872|GO:0035556|GO:0002250|GO:0016310|GO:0005737|GO:0004672|GO:0000166|GO:0016301|GO:0006468|GO:0004713|GO:0032633|GO:0032609|GO:0004715|GO:0016740|GO:0016772	NM_001281967	Mm.339927	16428	97.138	646.861	6.41588	8.31394	98.0639	98.4739	94.8761	647.967	643.394	649.221	6.40604	6.45592	6.38568	8.3358	8.30213	8.30389
A_55_P2102719	1.42544e-07	1.77395e-06	2.32103	up	XR_105545	chr13:91401086-91401035	Gm4130	PREDICTED: Mus musculus predicted gene 4130 (Gm4130), misc_RNA [XR_105545]		XR_105545	Mm.390625	100042959	16743.3	53847.9	14.3414	15.5562	17018.7	16666.5	16544.6	55180.4	53414.7	52948.5	14.3307	14.3669	14.3267	15.5642	15.5642	15.5402
A_55_P2132472	1.42767e-07	1.77463e-06	2.35199	up	NM_013830	chr13:34991032-34991091	Prpf4b	Mus musculus PRP4 pre-mRNA processing factor 4 homolog B (yeast) (Prpf4b), mRNA [NM_013830]	GO:0006397|GO:0008380|GO:0005694|GO:0005634|GO:0071013|GO:0005524|GO:0016310|GO:0004672|GO:0000166|GO:0004674|GO:0016301|GO:0005681|GO:0006468|GO:0016740|GO:0016772	NM_013830	Mm.10027	19134	367.537	1690.4	8.51736	9.75123	369.605	368.177	364.83	1666.28	1679.5	1725.43	8.50175	8.54486	8.50546	9.74888	9.74101	9.76382
A_51_P123625	1.43323e-07	1.77524e-06	13.0388	up	NM_008392	chr14:103455171-103455231	Irg1	Mus musculus immunoresponsive gene 1 (Irg1), mRNA [NM_008392]	GO:0034144|GO:0035458|GO:0002760|GO:0005739|GO:0006954|GO:0047613|GO:0071356|GO:0071393|GO:0032496|GO:0032480|GO:0071219|GO:0034136|GO:0045824|GO:0072573|GO:0019543|GO:0007566|GO:0047547|GO:0032088|GO:0006952|GO:0016829|GO:0071222|GO:0071346|GO:0045087|GO:0050728|GO:0008152|GO:0071347|GO:2000379	NM_008392	Mm.4662	16365	22.9795	443.046	4.06133	7.76607	24.082	22.4569	22.3997	443.524	441.603	444.011	4.13355	3.97921	4.07122	7.78729	7.75441	7.75651
A_55_P1997951	1.44101e-07	1.78139e-06	3.60041	up	NM_028242	chrX:54309773-54309831	Htatsf1	Mus musculus HIV TAT specific factor 1 (Htatsf1), transcript variant 1, mRNA [NM_028242]	GO:0008150|GO:0003674|GO:0006355|GO:0000166|GO:0003723|GO:0005634|GO:0003676|GO:0006351	NM_028242	Mm.2152	72459	207.938	1409.63	7.63207	9.48023	215.145	198.793	209.875	1390.99	1416.35	1421.53	7.66112	7.58725	7.64783	9.47411	9.48649	9.48008
A_51_P397925	1.44242e-07	1.78139e-06	2.01119	up	NM_133716	chr4:120641275-120641216	Smap2	Mus musculus small ArfGAP 2 (Smap2), mRNA [NM_133716]	GO:0008060|GO:0005737|GO:0032312|GO:0008270|GO:0005634|GO:0046872|GO:0005096	NM_133716	Mm.271819	69780	2417.49	9577.57	11.464	12.4721	2482.62	2345.73	2424.12	9558.34	9498.02	9676.35	11.4794	11.4442	11.4686	12.4753	12.4586	12.4823
A_55_P2079757	1.4503e-07	1.78681e-06	2.34583	up		chr1:031055087-031055028							419.469	1941.45	8.72208	9.95218	431.201	408.706	418.5	1931.48	1958.54	1934.34	8.74077	8.70173	8.72374	9.96191	9.96318	9.93144
A_55_P2038494	1.45121e-07	1.78681e-06	2.34403	up	NM_024233	chr9:48283288-48283229	Rexo2	Mus musculus REX2, RNA exonuclease 2 homolog (S. cerevisiae) (Rexo2), mRNA [NM_024233]	GO:0005739|GO:0008408|GO:0006139|GO:0004527|GO:0004518|GO:0090305|GO:0016787|GO:0005886|GO:0016788|GO:0005730|GO:0005634|GO:0003676	NM_024233	Mm.21911	104444	494.166	2298.12	8.98224	10.2112	502.601	487.242	492.657	2314.38	2300.05	2279.93	8.98217	8.98602	8.97853	10.238	10.2102	10.1855
A_55_P2083982	1.45517e-07	1.78681e-06	8.07635	up	NM_013811	chr17:30800381-30800440	Dnah8	Mus musculus dynein, axonemal, heavy chain 8 (Dnah8), mRNA [NM_013811]	GO:0017111|GO:0031514|GO:0005874|GO:0042995|GO:0003777|GO:0005524|GO:0003674|GO:0005929|GO:0008150|GO:0003774|GO:0005737|GO:0030286|GO:0000166|GO:0005856|GO:0016887|GO:0007018	NM_013811	Mm.426017	13417	12.0431	130.646	3.07238	6.08608	11.9227	12.0265	12.1801	126.82	132.808	132.31	3.05131	3.02231	3.14352	6.0697	6.10044	6.08811
A_66_P122290	1.45531e-07	1.78681e-06	2.85729	up	NM_145524	chr2:70811409-70811350	Mettl8	Mus musculus methyltransferase like 8 (Mettl8), transcript variant a, mRNA [NM_145524]	GO:0005737|GO:0016573|GO:0007519|GO:0008168|GO:0008152|GO:0045444|GO:0005634|GO:0032259|GO:0016740|GO:0004402	NM_145524	Mm.490343	228019	48.5289	217.152	5.2663	6.78095	48.7993	48.3469	48.4406	212.845	214.479	224.133	5.2662	5.24834	5.28437	6.77488	6.75715	6.81083
A_55_P1975341	1.46056e-07	1.79117e-06	2.04793	up	NM_016777	chr4:116274302-116274243	Nasp	Mus musculus nuclear autoantigenic sperm protein (histone-binding) (Nasp), transcript variant 2, mRNA [NM_016777]	GO:0006260|GO:0005515|GO:0042393|GO:0007049|GO:0005737|GO:0043486|GO:0008283|GO:0001824|GO:0051879|GO:0006810|GO:0005634|GO:0015031	NM_016777	Mm.257181	50927	1840.13	7495.87	11.0433	12.0775	1887.13	1788.6	1844.66	7497.81	7500.97	7488.82	11.0583	11.0226	11.049	12.088	12.0809	12.0635
A_55_P2182437	1.46173e-07	1.79156e-06	2.05663	up	XM_003946168	chr5:64565429-64565488		TBC1 domain family, member 1 [Source:MGI Symbol;Acc:MGI:1889508] [ENSMUST00000129389]		XM_003946168	Mm.286353		894.23	3733.81	9.93	10.9703	915.007	884.933	882.75	3672.79	3750.98	3777.65	9.9366	9.94641	9.90697	10.9596	10.9749	10.9763
A_52_P153327	1.46704e-07	1.79493e-06	3.2884	up	NM_010891	chr1:95395864-95395923	Sept2	Mus musculus septin 2 (Sept2), transcript variant 2, mRNA [NM_010891]	GO:0031105|GO:0005515|GO:0060170|GO:0051258|GO:0048471|GO:0005826|GO:0005886|GO:0003924|GO:0045202|GO:0005634|GO:0042995|GO:0015629|GO:0031175|GO:0042802|GO:0007224|GO:0032880|GO:0000910|GO:0005737|GO:0000145|GO:0000166|GO:0015630|GO:0030234|GO:0005876|GO:0005856|GO:0005938|GO:0009986|GO:0005694|GO:0005730|GO:0030496|GO:0002036|GO:0005525|GO:0006184|GO:0042384|GO:0050790|GO:0032947|GO:0007049|GO:…	NM_010891	Mm.428652	18000	62.1023	337.727	5.67214	7.38952	63.3543	62.9928	59.9599	332.642	335.453	345.085	5.68837	5.69491	5.63314	7.38753	7.37536	7.40568
A_51_P108226	1.47639e-07	1.79875e-06	2.44265	up	NM_183249	chr11:83566028-83566087	1100001G20Rik	Mus musculus RIKEN cDNA 1100001G20 gene (1100001G20Rik), mRNA [NM_183249]	GO:0050872|GO:0032496|GO:0034612|GO:0010577|GO:0043085|GO:0005615	NM_183249	Mm.902	66107	139.225	637.903	7.00333	8.29177	141.524	135.963	140.188	636.034	632.89	644.784	7.01361	6.97613	7.02025	8.30667	8.27731	8.29134
A_55_P2026783	1.47693e-07	1.79875e-06	2.30065	up	AK122372	chr9:106776431-106776490	Vprbp	Vpr (HIV-1) binding protein [Source:MGI Symbol;Acc:MGI:2445220] [ENSMUST00000055009]	GO:0005737|GO:0008180|GO:0005634		Mm.440089	321006	75.3884	295.638	6.00052	7.20256	76.1963	76.1643	73.8045	294.555	293.84	298.519	6.00173	6.02191	5.97792	7.21777	7.19027	7.19963
A_66_P124011	1.477e-07	1.79875e-06	2.13746	up	NM_011464	chr7:30041381-30041332	Spint2	Mus musculus serine protease inhibitor, Kunitz type 2 (Spint2), transcript variant 1, mRNA [NM_011464]	GO:0005737|GO:0016020|GO:0004867|GO:0010466|GO:0016021|GO:0030414	NM_011464	Mm.295230	20733	1377.56	5949.79	10.598	11.6939	1403.02	1374.22	1355.45	5916.8	5984.84	5947.73	10.6015	10.6163	10.5761	11.7004	11.7016	11.6796
A_51_P115471	1.48954e-07	1.80564e-06	8.01526	up	AK046043	chr15:77578413-77578354	Apol8	apolipoprotein L 8 [Source:MGI Symbol;Acc:MGI:2444921] [ENSMUST00000089450]	GO:0008150|GO:0003674|GO:0005575		Mm.125650	239552	46.3671	597.749	5.19246	8.19521	47.6652	47.7341	43.7019	601.769	593.508	597.97	5.22733	5.22594	5.12413	8.22698	8.18146	8.1772
A_51_P401749	1.50407e-07	1.81698e-06	2.81837	up	NM_172567	chr11:104996731-104999064	Mettl2	Mus musculus methyltransferase like 2 (Mettl2), mRNA [NM_172567]	GO:0008168|GO:0005575|GO:0032259|GO:0016740	NM_172567	Mm.270091	52686	131.135	689.524	6.90812	8.40298	132.909	128.543	131.952	692.125	686.938	689.51	6.91049	6.88296	6.93092	8.42796	8.39433	8.38665
A_52_P1078018	1.5117e-07	1.82201e-06	4.44526	up	AJ249820	chr6:41012732-41012791		Mus musculus TRBV gene for T-cell receptor beta chain, variable region, 279BP. [AJ249820]			Mm.389744		464.454	3879.07	8.88584	11.0381	457.768	469.943	465.651	3837.92	3915.22	3884.08	8.83822	8.9283	8.89101	11.0386	11.0504	11.0253
A_55_P2152886	1.51644e-07	1.82667e-06	2.09008	up	NM_029610	chr7:127059740-127059799	Lyrm1	Mus musculus LYR motif containing 1 (Lyrm1), transcript variant 1, mRNA [NM_029610]	GO:0005739|GO:0008150|GO:0003674	NM_029610	Mm.46381	73919	118.166	455.848	6.74156	7.80512	119.37	116.774	118.355	451.521	452.428	463.594	6.73336	6.72638	6.76493	7.81166	7.79258	7.81111
A_55_P2130834	1.55283e-07	1.85247e-06	4.03949	up									14.7545	77.4259	3.34207	5.35624	14.7565	14.8219	14.6852	76.2395	76.9423	79.0958	3.33721	3.30319	3.3858	5.3615	5.33896	5.36825
A_55_P2056606	1.57401e-07	1.86494e-06	2.99539	up		chr1_random:000842313-000842254							3014.27	17039.6	11.7962	13.379	3129.34	2946.7	2966.78	16748.9	17057.5	17312.4	11.8293	11.7822	11.7772	13.3573	13.3833	13.3963
A_55_P2080975	1.57481e-07	1.86494e-06	8.86605	up	NM_001172148	chrX:136502795-136502736	Rbm41	Mus musculus RNA binding motif protein 41 (Rbm41), transcript variant 3, mRNA [NM_001172148]	GO:0008150|GO:0003674|GO:0000166|GO:0003723|GO:0005575|GO:0003676	NM_001172148	Mm.256670	237073	8.99029	116.529	2.7881	5.93639	8.58637	9.37933	9.00516	110.914	120.369	118.305	2.74014	2.7785	2.84566	5.89028	5.97875	5.94014
A_51_P459340	1.57673e-07	1.86617e-06	2.36068	up	NM_025755	chr5:48779510-48779569	Pacrgl	Mus musculus PARK2 co-regulated-like (Pacrgl), mRNA [NM_025755]	GO:0008150|GO:0003674|GO:0005575	NM_025755	Mm.29409	66768	214.409	974.212	7.6772	8.9164	219.36	206.656	217.212	957.595	979.087	985.955	7.68969	7.64692	7.69499	8.90815	8.92178	8.91928
A_55_P2001159	1.58228e-07	1.87168e-06	2.45011	up	NM_025699	chr2:163231624-163231565	Oser1	Mus musculus oxidative stress responsive serine rich 1 (Oser1), mRNA [NM_025699]	GO:0008150|GO:0003674|GO:0070301|GO:0005575	NM_025699	Mm.25119	66680	4698.88	21149.8	12.4349	13.7277	4816.9	4713.92	4565.82	21109	21110.6	21229.8	12.4451	12.4565	12.4031	13.7241	13.7334	13.7257
A_52_P434055	1.59333e-07	1.88025e-06	3.47818	up	BC011338	chr9:7856221-7856162	Birc3	Mus musculus baculoviral IAP repeat-containing 3, mRNA (cDNA clone MGC:18386 IMAGE:3661563), complete cds. [BC011338]	GO:0005515|GO:0004842|GO:0070266|GO:0016567|GO:0016874|GO:0006915|GO:0005634|GO:0042981|GO:0051291|GO:0046872|GO:0005622|GO:0042326|GO:0043234|GO:0005737|GO:0008270|GO:0045121|GO:2000378|GO:0060544|GO:0060546		Mm.2026	11796	224.645	1468.11	7.74599	9.54432	232.574	222.655	218.706	1448.66	1456.06	1499.61	7.77878	7.75342	7.70577	9.53969	9.53278	9.5605
A_66_P133270	1.59394e-07	1.88025e-06	2.87219	up	NM_025813	chr3:67398762-67400110	Mfsd1	Mus musculus major facilitator superfamily domain containing 1 (Mfsd1), mRNA [NM_025813]	GO:0008150|GO:0003674|GO:0016020|GO:0006810|GO:0016021|GO:0005575|GO:0055085	NM_025813	Mm.491153	66868	246.794	1346.91	7.88376	9.40591	252.07	238.691	249.621	1350.88	1327.35	1362.49	7.88478	7.85628	7.91023	9.42479	9.38474	9.40821
A_52_P355014	1.60577e-07	1.89097e-06	2.50112	up	NM_025875	chr3:96434833-96434892	Rbm8a	Mus musculus RNA binding motif protein 8a (Rbm8a), transcript variant 2, mRNA [NM_025875]	GO:0000184|GO:0000381|GO:0005634|GO:0071013|GO:0003729|GO:0035145	NM_025875	Mm.261972	60365	1853.47	9047.04	11.0558	12.3783	1893.92	1811.81	1854.68	8826.48	9090.1	9224.54	11.0658	11.0442	11.0573	12.3475	12.3886	12.3989
A_51_P224468	1.60989e-07	1.89325e-06	2.5071	up	NM_001081181	chr1:57470113-57470172	9430016H08Rik	Mus musculus RIKEN cDNA 9430016H08 gene (9430016H08Rik), mRNA [NM_001081181]	GO:0005739|GO:0008150|GO:0003674|GO:0005575	NM_001081181	Mm.275428	68115	581.021	2847.79	9.23171	10.5577	591.23	571.826	580.005	2872.11	2798.33	2872.94	9.23239	9.23195	9.23078	10.5885	10.5299	10.5548
A_52_P513842	1.61105e-07	1.89325e-06	2.14189	up	NM_057172	chr3:151885110-151885169	Fubp1	Mus musculus far upstream element (FUSE) binding protein 1 (Fubp1), mRNA [NM_057172]	GO:0010628|GO:0005515|GO:0006355|GO:0006366|GO:0045944|GO:0003723|GO:0001205|GO:0005634|GO:0003677|GO:0006351	NM_057172	Mm.278922	51886	103.297	399.454	6.51718	7.61606	104.511	101.735	103.644	399.897	393.608	404.857	6.50818	6.50999	6.53336	7.63443	7.59489	7.61886
A_55_P2164047	1.61131e-07	1.89325e-06	2.05888	up		chr8:097359726-097359785		Q80UT7_MOUSE (Q80UT7) Rpl7a protein (Fragment), partial (98%) [TC1611833]					7980.87	28679.2	13.2206	14.2625	8224.33	7731.3	7986.97	29068.8	28281.4	28687.4	13.2357	13.2003	13.2258	14.2685	14.2463	14.2726
A_51_P183912	1.61834e-07	1.89983e-06	2.05231	up	NM_016671	chr8:86554944-86554885	Il27ra	Mus musculus interleukin 27 receptor, alpha (Il27ra), mRNA [NM_016671]	GO:0048302|GO:0032729|GO:0005515|GO:0016020|GO:0002829|GO:0050830|GO:0002827|GO:0016021|GO:0045509|GO:0070106	NM_016671	Mm.38386	50931	1035.15	4251.05	10.1503	11.1876	1055.24	1018.37	1031.84	4291.84	4223.99	4237.33	10.1537	10.1507	10.1467	11.2136	11.1776	11.1716
A_55_P2143075	1.6207e-07	1.89983e-06	2.4178	up	NM_019639	chr5:125866422-125866363	Ubc	Mus musculus ubiquitin C (Ubc), mRNA [NM_019639]	GO:0005515|GO:0010992|GO:0005737|GO:0005634|GO:0002020	NM_019639	Mm.419997	22190	39419.6	114132	15.8211	17.0948	40186.1	38503.5	39569.2	120731	110517	111150	15.8061	15.811	15.8463	17.1098	17.075	17.0997
A_55_P2066041	1.62078e-07	1.89983e-06	4.61392	up	NM_010447	chr15:103072642-103072701	Hnrnpa1	Mus musculus heterogeneous nuclear ribonucleoprotein A1 (Hnrnpa1), transcript variant 1, mRNA [NM_010447]	GO:0006397|GO:0008380|GO:0051170|GO:0003723|GO:0005634|GO:0071013|GO:0003676|GO:0019013|GO:0005737|GO:0000166|GO:0003697|GO:0030529|GO:0000380|GO:0006810|GO:0005654|GO:0005681|GO:0051028|GO:0045111|GO:0051168|GO:0019012	NM_010447	Mm.237064	15382	878.67	7648.02	9.90342	12.1094	883.278	892.555	860.177	7607.83	7677.14	7659.09	9.88309	9.95835	9.86883	12.1126	12.1168	12.0989
A_52_P241544	1.62233e-07	1.89983e-06	3.23202	up	NM_028150	chr5:31817699-31817640	Supt7l	Mus musculus suppressor of Ty 7-like (Supt7l), mRNA [NM_028150]	GO:0006355|GO:0043966|GO:0051457|GO:0030914|GO:0003713|GO:0005634|GO:2001141|GO:0006351|GO:0004402	NM_028150	Mm.164187	72195	29.9707	140.99	4.49162	6.18406	30.3617	30.3515	29.1988	136.289	145.402	141.279	4.5083	4.48437	4.48219	6.1561	6.22289	6.17319
A_55_P2178525	1.6251e-07	1.90084e-06	2.14654	up	NM_009080	chr11:68716730-68716789	Rpl26	Mus musculus ribosomal protein L26 (Rpl26), mRNA [NM_009080]	GO:0006364|GO:0042273|GO:0022625	NM_009080	Mm.306548	19941	46305.1	117537	16.0639	17.1659	48631.4	44365.8	45917.9	123578	114542	114491	16.0886	16.0441	16.059	17.1689	17.1555	17.1733
A_66_P132787	1.62772e-07	1.90084e-06	4.61738	up	M11859	chr6:41138875-41138934		Mouse T-cell receptor active bet- chain V-region (V15-D-J2.2) mRNA. [M11859]			Mm.452774		415.409	3610.8	8.70966	10.9167	422.976	416.506	406.745	3550.38	3717.68	3564.33	8.71787	8.73333	8.6778	10.9061	10.9608	10.8833
A_66_P107258	1.63422e-07	1.90631e-06	3.40981	up	AK050354	chr2:156403098-156403157	Gm14168	Mus musculus adult male liver tumor cDNA, RIKEN full-length enriched library, clone:C730040K02 product:hypothetical protein, full insert sequence. [AK050354]			Mm.156674	791421	74.019	435.158	5.9708	7.74049	76.1738	72.1392	73.7439	420.675	441.631	443.167	5.99981	5.93628	5.97632	7.71421	7.75483	7.75244
A_55_P2141878	1.63638e-07	1.90672e-06	2.21195	up	NM_001136069	chr7:54107294-54107353	Ldha	Mus musculus lactate dehydrogenase A (Ldha), transcript variant 2, mRNA [NM_001136069]	GO:0005515|GO:0006089|GO:0044262|GO:0043065|GO:0005975|GO:0019674|GO:0003824|GO:0006096|GO:0042802|GO:0005829|GO:0016616|GO:0005739|GO:0004457|GO:0005929|GO:0005737|GO:0051287|GO:0004459|GO:0031668|GO:0016491|GO:0019900|GO:0055114	NM_001136069	Mm.29324	16828	911.823	4044.53	9.96513	11.1104	938.527	881.306	915.637	4022.55	4026.67	4084.36	9.98543	9.93871	9.97125	11.118	11.1008	11.1125
A_66_P108622	1.64002e-07	1.90674e-06	3.03477	up	NM_153116	chr5:5543351-5543292	Gtpbp10	Mus musculus GTP-binding protein 10 (putative) (Gtpbp10), mRNA [NM_153116]	GO:0005739|GO:0008150|GO:0000287|GO:0000166|GO:0042254|GO:0003924|GO:0005634|GO:0005525	NM_153116	Mm.323984	207704	71.2067	367.893	5.90715	7.50874	71.625	72.4302	69.5649	365.569	370.254	367.855	5.89707	5.94372	5.88067	7.51991	7.51362	7.49269
A_55_P2152468	1.64197e-07	1.90793e-06	2.03152	up		chr19:005132022-005131963							3194.04	12731.2	11.8792	12.9017	3276.42	3093.72	3211.98	12722.7	12605.8	12865	11.8927	11.8549	11.8899	12.9068	12.8916	12.9068
A_52_P5891	1.64513e-07	1.90921e-06	3.49942	up	NM_029658	chr11:75833721-75833662	Fam101b	Mus musculus family with sequence similarity 101, member B (Fam101b), mRNA [NM_029658]	GO:0030036|GO:0031005|GO:0001837|GO:0015629	NM_029658	Mm.34131	76566	380.46	2577.11	8.57227	10.3794	386.345	366.214	388.821	2513.18	2597.16	2620.99	8.57196	8.53758	8.60727	10.3563	10.3878	10.394
A_51_P496751	1.64577e-07	1.90921e-06	2.04166	up	NM_018868	chr1:59768230-59768289	Nop58	Mus musculus NOP58 ribonucleoprotein (Nop58), mRNA [NM_018868]	GO:0005737|GO:0030515|GO:0015030|GO:0042254|GO:0030519|GO:0070761|GO:0005730|GO:0005732|GO:0005634|GO:0006608	NM_018868	Mm.220367	55989	3122.9	12545.7	11.8503	12.88	3234.51	3058.06	3076.12	12489.6	12551.4	12596.1	11.8765	11.8381	11.8362	12.8805	12.8827	12.8768
A_52_P449629	1.6485e-07	1.91131e-06	2.52087	up	NM_001013806	chr3:157668760-157668819	Ankrd13c	Mus musculus ankyrin repeat domain 13c (Ankrd13c), mRNA [NM_001013806]	GO:0010869|GO:0048471|GO:0016020|GO:0005783|GO:0005102|GO:2000209|GO:0006621	NM_001013806	Mm.265806	433667	215.763	1047.12	7.68488	9.01881	220.754	215.682	210.853	1023.93	1052.24	1065.19	7.69754	7.70354	7.65357	9.00536	9.02325	9.02781
A_55_P2071802	1.65288e-07	1.91364e-06	2.09919	up	NM_009193	chr5:33988209-33988150	Slbp	Mus musculus stem-loop binding protein (Slbp), mRNA [NM_009193]	GO:0006397|GO:0005737|GO:0006398|GO:0033260|GO:0030529|GO:0003723|GO:0005634|GO:0071204|GO:0051028|GO:0071207|GO:0003729	NM_009193	Mm.4172	20492	600.379	2528.86	9.282	10.3518	609.251	595.054	596.831	2465.5	2553.51	2567.56	9.27801	9.29714	9.27084	10.3292	10.3623	10.364
A_51_P121891	1.65863e-07	1.91672e-06	2.03479	up	NM_009008	chr15:78391511-78391452	Rac2	Mus musculus RAS-related C3 botulinum substrate 2 (Rac2), mRNA [NM_009008]	GO:0008284|GO:0030036|GO:0007264|GO:0045453|GO:0003924|GO:0060263|GO:0005635|GO:0005525|GO:0005622|GO:0006184|GO:0005737|GO:0000166|GO:0006935|GO:0016020|GO:0030031	NM_009008	Mm.1972	19354	21805.3	62282.5	14.8497	15.8746	22140.5	21412	21863.3	63311.9	61736.5	61799.2	14.8401	14.8472	14.8619	15.8517	15.8836	15.8885
A_51_P333869	1.66108e-07	1.91788e-06	2.37163	up	NM_023239	chr7:72017337-72017278	Ndnl2	Mus musculus necdin-like 2 (Ndnl2), mRNA [NM_023239]	GO:0005515|GO:0006355|GO:0005737|GO:0000781|GO:0006281|GO:0005694|GO:0030915|GO:0031398|GO:0006310|GO:0005634|GO:0040008|GO:0006974	NM_023239	Mm.19944	66647	376.304	1750.89	8.5534	9.79928	383.851	374.833	370.228	1742.3	1758.43	1751.94	8.55793	8.57553	8.52675	9.80777	9.80557	9.78449
A_51_P295192	1.6648e-07	1.92068e-06	5.41331	up	NM_010907	chr12:56591440-56590945	Nfkbia	Mus musculus nuclear factor of kappa light polypeptide gene enhancer in B cells inhibitor, alpha (Nfkbia), mRNA [NM_010907]	GO:0005515|GO:0034142|GO:0005886|GO:0005634|GO:0042994|GO:0070427|GO:0032403|GO:0010875|GO:0005829|GO:0042802|GO:0005737|GO:0045638|GO:0045944|GO:0031072|GO:0042127|GO:0032496|GO:0031663|GO:0031625|GO:0000060|GO:0045746|GO:0051059|GO:0010745|GO:0007253|GO:0070431|GO:0032088|GO:0010888|GO:0032270|GO:0043234|GO:0008139|GO:0032495|GO:0045893|GO:0019899|GO:0043330	NM_010907	Mm.170515	18035	11720.6	75122.2	13.8117	16.2482	11671.6	11966.1	11524.3	78694.2	73602.2	73070.3	13.7789	13.8607	13.7955	16.2866	16.2291	16.2291
A_55_P2112355	1.66924e-07	1.92275e-06	2.43141	up		chr15:068707960-068708019							6114.72	26118.1	12.8087	14.0905	6136.77	5980.16	6227.23	26065.2	26278.2	26011	12.792	12.7951	12.8391	14.0884	14.1028	14.0804
A_52_P450123	1.68197e-07	1.92871e-06	3.50142	up	NM_177721	chr19:29883646-29883587	Ranbp6	Mus musculus RAN binding protein 6 (Ranbp6), mRNA [NM_177721]	GO:0008150|GO:0003674|GO:0005737|GO:0006810|GO:0005634|GO:0005575|GO:0015031	NM_177721	Mm.125503	240614	100.214	630.734	6.46662	8.27456	102.073	101.425	97.1456	620.105	629.262	642.835	6.47056	6.50339	6.4259	8.2688	8.26719	8.28768
A_55_P2159780	1.69927e-07	1.93687e-06	2.35166	up	NM_145571	chr6:83290876-83290935	Mob1a	Mus musculus MOB kinase activator 1A (Mob1a), mRNA [NM_145571]	GO:0005622|GO:0035329|GO:0046872	NM_145571	Mm.29500	232157	142.587	629.309	7.03902	8.2727	144.286	141.138	142.337	611.394	627.371	649.163	7.03935	7.03657	7.04115	8.25034	8.26418	8.30359
A_66_P131530	1.7105e-07	1.94146e-06	2.32726	up	NM_019428	chr19:36168886-36168945	Rpp30	Mus musculus ribonuclease P/MRP 30 subunit (Rpp30), mRNA [NM_019428]	GO:0008150|GO:0003674|GO:0016787|GO:0004526|GO:0005634|GO:0004540|GO:0005575|GO:0003824|GO:0008033	NM_019428	Mm.277891	54364	245.489	1099.71	7.87359	9.09222	253.516	237.495	245.456	1093.55	1103.67	1101.9	7.89252	7.84665	7.88161	9.10048	9.09939	9.07681
A_52_P500274	1.71477e-07	1.94526e-06	2.02992	up	NM_182809	chr7:85445967-85445908	Ntrk3	Mus musculus neurotrophic tyrosine kinase, receptor, type 3 (Ntrk3), transcript variant 2, mRNA [NM_182809]	GO:0005515|GO:0032856|GO:0008284|GO:0070306|GO:0005886|GO:2000251|GO:0030154|GO:0050927|GO:0002039|GO:0000187|GO:0033138|GO:0005737|GO:0046777|GO:0000166|GO:0016301|GO:0032148|GO:0060548|GO:0016772|GO:0042490|GO:0030335|GO:0048665|GO:0007275|GO:0005524|GO:0007399|GO:0048712|GO:0010628|GO:0016310|GO:0005030|GO:0004672|GO:0046875|GO:0016020|GO:0005887|GO:0048691|GO:0001933|GO:0006468|GO:0004713|GO:…	NM_182809	Mm.33496	18213	135.361	514.794	6.95899	7.98041	136.103	134.23	135.749	504.319	513.096	526.967	6.94943	6.95591	6.97162	7.97039	7.96743	8.00342
A_55_P2011084	1.71907e-07	1.9489e-06	2.68182	up	AK172348	chr7:111511427-111511368		tripartite motif-containing 30B [Source:MGI Symbol;Acc:MGI:4821256] [ENSMUST00000164410]			Mm.347647		66.2653	297.084	5.78618	7.2094	66.4653	67.7272	64.6036	293.013	297.807	300.433	5.77482	5.82239	5.76134	7.20984	7.20851	7.20984
A_55_P2124461	1.72603e-07	1.95212e-06	3.45233	up	BC057675	chr7:18126906-18126965		Mus musculus cDNA clone IMAGE:4189351, partial cds. [BC057675]			Mm.290617		6926.16	37482.3	13.0072	14.7948	7118.82	6664.43	6995.23	37638.1	37024.2	37784.7	13.0206	12.972	13.029	14.7743	14.7859	14.8242
A_55_P2163404	1.72639e-07	1.95212e-06	2.29127	up	XM_001481032	chr14:19102826-19102532		predicted pseudogene 10020 [Source:MGI Symbol;Acc:MGI:3642192] [ENSMUST00000081993]		XM_001481032	Mm.2050		10933.7	39843.4	13.706	14.9021	11295.2	10699.3	10806.6	40631	39764.9	39134.2	13.7309	13.6983	13.6887	14.9076	14.9141	14.8846
A_52_P533198	1.73041e-07	1.95351e-06	2.93945	up	NM_009584	chr5:21272513-21272454	Dnajc2	Mus musculus DnaJ (Hsp40) homolog, subfamily C, member 2 (Dnajc2), mRNA [NM_009584]	GO:0005515|GO:0043130|GO:0006355|GO:0030308|GO:0031965|GO:0005634|GO:0003677|GO:0006351|GO:0005829|GO:0006260|GO:0042393|GO:0005737|GO:0003682|GO:2000279|GO:0030544|GO:0045893|GO:0016568	NM_009584	Mm.266312	22791	368.373	2111.59	8.51965	10.0752	367.244	370.534	367.339	2100.72	2100.61	2133.42	8.48945	8.55575	8.51376	10.0858	10.065	10.0748
A_52_P543040	1.74412e-07	1.96162e-06	3.30736	up	NM_028276	chrX:45628267-45628326	Utp14a	Mus musculus UTP14, U3 small nucleolar ribonucleoprotein, homolog A (yeast) (Utp14a), mRNA [NM_028276]	GO:0008150|GO:0003674|GO:0042254|GO:0006364|GO:0032040|GO:0005634|GO:0005575	NM_028276	Mm.336045	72554	93.1407	548.498	6.3441	8.06978	96.3712	90.8036	92.2473	543.004	540.57	561.919	6.38038	6.31755	6.33436	8.07419	8.04633	8.08882
A_55_P2033362	1.74975e-07	1.96589e-06	6.3141	up	NM_010118	chr10:67004798-67004857	Egr2	Mus musculus early growth response 2 (Egr2), mRNA [NM_010118]	GO:0005515|GO:0003700|GO:0044212|GO:0006366|GO:0016874|GO:0005634|GO:0035914|GO:0046872|GO:0014037|GO:0005737|GO:0071371|GO:0021660|GO:0030278|GO:0048168|GO:0045944|GO:0035284|GO:0006611|GO:0045444|GO:0031625|GO:0001102|GO:0032868|GO:0043066|GO:0006355|GO:0071310|GO:0042552|GO:0021569|GO:0003676|GO:0003677|GO:0006351|GO:0021666|GO:0008045|GO:0003682|GO:0071837|GO:0007622|GO:0071320|GO:0045893|GO:…	NM_010118	Mm.290421	13654	130.294	1480.83	6.90121	9.55978	129.971	135.169	125.743	1474.79	1481.28	1486.42	6.87809	6.96804	6.85749	9.57291	9.55939	9.54705
A_51_P143142	1.75419e-07	1.96874e-06	2.05108	up	NM_027204	chr11:120349740-120349799	Mrpl12	Mus musculus mitochondrial ribosomal protein L12 (Mrpl12), mRNA [NM_027204]	GO:0005739|GO:0005622|GO:0003735|GO:0030529|GO:0005761|GO:0005840|GO:0006390|GO:0045893|GO:0006412|GO:0005762	NM_027204	Mm.491127	56282	793.942	3278.8	9.72925	10.7656	813.465	776.177	792.184	3288.55	3272.25	3275.6	9.74243	9.71593	9.72939	10.7864	10.7624	10.7481
A_55_P2063107	1.76837e-07	1.97835e-06	7.02998	up		chr4:98341122-98341181	Inadl	InaD-like (Drosophila) [Source:MGI Symbol;Acc:MGI:1277960] [ENSMUST00000107034]	GO:0005515|GO:0043234|GO:0048471|GO:0005737|GO:0030054|GO:0016020|GO:0005886|GO:0045177|GO:0005923			12695	40.1052	445.291	4.95858	7.7721	42.2638	39.5256	38.5261	436.525	449.399	449.948	5.03159	4.91929	4.92486	7.76447	7.78139	7.77044
A_55_P2020443	1.7722e-07	1.97896e-06	4.58709	up	NM_198090	chr2:75500576-75500719	Hnrnpa3	Mus musculus heterogeneous nuclear ribonucleoprotein A3 (Hnrnpa3), transcript variant a, mRNA [NM_198090]	GO:0043005|GO:0005737|GO:0051033|GO:0005730|GO:0035770|GO:0005634|GO:0051028|GO:0071013|GO:0003729|GO:0055085	NM_198090	Mm.379375	229279	875.826	7576.26	9.89749	12.0951	884.225	888.499	854.755	7472.12	7585.44	7671.2	9.8843	9.95121	9.85697	12.0814	12.1011	12.1028
A_51_P473734	1.77759e-07	1.98013e-06	2.21402	up	NM_010386	chr17:34274300-34274863	H2-DMa	Mus musculus histocompatibility 2, class II, locus DMa (H2-DMa), mRNA [NM_010386]	GO:0005515|GO:0016064|GO:0005765|GO:0015031|GO:0005764|GO:0005622|GO:0019886|GO:0006955|GO:0019882|GO:0002636|GO:0045582|GO:0002922|GO:0048839|GO:0005770|GO:0005771|GO:0002504|GO:0042613|GO:0045059|GO:0006461|GO:0016020|GO:0050778|GO:0051085|GO:0016021|GO:0010008|GO:0005768	NM_010386	Mm.16373	14998	1223.4	5452.14	10.4102	11.5569	1240.48	1222.48	1207.23	5372.11	5492.77	5491.55	10.4054	10.4349	10.3904	11.5448	11.5705	11.5553
A_66_P121459	1.77819e-07	1.98013e-06	2.47007	up	NM_007681	chr5:30974916-30975386	Cenpa	Mus musculus centromere protein A (Cenpa), mRNA [NM_007681]	GO:0000780|GO:0046982|GO:0005694|GO:0000132|GO:0006334|GO:0005634|GO:0071459|GO:0003677|GO:0051382|GO:0000776|GO:0000778|GO:0000786|GO:0000775|GO:0000939	NM_007681	Mm.290563	12615	499.782	2455	9.00302	10.3076	511.752	483.672	503.921	2464.66	2428.5	2471.84	9.0119	8.97705	9.02011	10.3285	10.2919	10.3022
A_51_P240253	1.79706e-07	1.99565e-06	3.68641	up	NM_019662	chr8:107152591-107152532	Rrad	Mus musculus Ras-related associated with diabetes (Rrad), mRNA [NM_019662]	GO:0006184|GO:0005515|GO:0007165|GO:0005516|GO:0030308|GO:0016020|GO:0005886|GO:0000166|GO:0007264|GO:0003924|GO:0005525	NM_019662	Mm.29467	56437	228.157	1569.53	7.76808	9.6503	235.867	226.819	221.783	1573.11	1555.3	1580.18	7.79675	7.7829	7.72461	9.6719	9.63452	9.64448
A_52_P220573	1.80128e-07	1.99723e-06	2.11031	up	NM_009250	chr3:75446123-75446182	Serpini1	Mus musculus serine (or cysteine) peptidase inhibitor, clade I, member 1 (Serpini1), mRNA [NM_009250]	GO:0030162|GO:0010951|GO:0004867|GO:0010466|GO:0005576|GO:0030414|GO:0030155|GO:0005615	NM_009250	Mm.41560	20713	509.956	2151.15	9.03128	10.1087	515.575	497.113	517.18	2111.62	2161.19	2180.62	9.02192	9.01687	9.05506	10.0935	10.1158	10.1169
A_55_P2150734	1.80887e-07	2.00101e-06	3.26907	up	JX120218	chr12:114835850-114835791		Mus musculus strain C57BL/6 clone 72 immunoglobulin heavy chain mRNA, partial cds. [JX120218]			Mm.438194		198.005	1230.49	7.55603	9.26492	205.559	194.232	194.223	1232.25	1212.86	1246.37	7.58915	7.54992	7.52904	9.2857	9.2382	9.27084
A_51_P126067	1.81017e-07	2.00101e-06	2.0319	up	NM_013486	chr3:101086981-101083802	Cd2	Mus musculus CD2 antigen (Cd2), mRNA [NM_013486]	GO:0005515|GO:0030971|GO:0009986|GO:0019901|GO:0005576|GO:0043621|GO:0003823|GO:0042803|GO:0043234|GO:0042110|GO:0016337|GO:0001948|GO:0016020|GO:0009898|GO:0045121|GO:0004872|GO:0016021|GO:0007155|GO:0046658|GO:0009897	NM_013486	Mm.22842	12481	1356.24	5585.69	10.5735	11.5963	1363.79	1358.36	1346.55	5562.19	5577.6	5617.28	10.5579	10.5985	10.5641	11.6057	11.5923	11.5909
A_55_P2121081	1.81977e-07	2.01016e-06	2.09013	up	NM_029402	chr18:3434034-3434093	Cul2	Mus musculus cullin 2 (Cul2), mRNA [NM_029402]	GO:0005515|GO:0031461|GO:0030163|GO:0006511|GO:0030891|GO:0031462|GO:0032403|GO:0031625	NM_029402	Mm.291707	71745	554.085	2323.82	9.16207	10.2257	558.125	554.309	549.821	2319.9	2298.9	2352.67	9.15313	9.18261	9.15046	10.2423	10.2092	10.2255
A_51_P367866	1.84584e-07	2.03254e-06	2.16145	up	NM_007913	chr18:35024395-35024454	Egr1	Mus musculus early growth response 1 (Egr1), mRNA [NM_007913]	GO:0003700|GO:0044212|GO:0006366|GO:0072110|GO:0000982|GO:0005634|GO:0071480|GO:0035914|GO:0046872|GO:0005737|GO:0072303|GO:0071371|GO:0043525|GO:0003690|GO:0045944|GO:0048169|GO:0007611|GO:0033233|GO:0090090|GO:0010942|GO:0070498|GO:0035035|GO:0032868|GO:0043066|GO:0000976|GO:0006355|GO:0000977|GO:0071310|GO:0000122|GO:0030509|GO:0003676|GO:0003677|GO:0000979|GO:0006351|GO:0009749|GO:0043565|GO:…	NM_007913	Mm.181959	13653	1345.93	5867.79	10.5629	11.6749	1342.35	1336.71	1358.73	5817.57	5832.12	5953.68	10.5363	10.573	10.5794	11.6779	11.6633	11.6835
A_52_P651078	1.85422e-07	2.03812e-06	2.12259	up	NM_027226	chr16:32908484-32908543	Fyttd1	Mus musculus forty-two-three domain containing 1 (Fyttd1), transcript variant 1, mRNA [NM_027226]	GO:0006406|GO:0016607|GO:0003723|GO:0006810|GO:0005654|GO:0005634|GO:0051028|GO:0003729	NM_027226	Mm.12831	69823	86.1081	318.815	6.22195	7.30777	88.1286	84.449	85.7468	318.529	319.764	318.152	6.23853	6.20369	6.22363	7.32448	7.30978	7.28906
A_52_P377160	1.85608e-07	2.03812e-06	2.19635	up	NM_172451	chr15:100523444-100523385	Galnt6	Mus musculus UDP-N-acetyl-alpha-D-galactosamine:polypeptide N-acetylgalactosaminyltransferase 6 (Galnt6), transcript variant 2, mRNA [NM_172451]	GO:0048471|GO:0004653|GO:0005794|GO:0016020|GO:0016757|GO:0016021|GO:0016740	NM_172451	Mm.22969	207839	96.5791	377.845	6.40884	7.54395	97.2312	96.301	96.2051	367.654	375.712	390.169	6.3971	6.41864	6.41078	7.52717	7.53363	7.57105
A_55_P2131060	1.85711e-07	2.03812e-06	2.60248	up	XM_003945589	chr19:8107651-8107710	LOC101055780	PREDICTED: Mus musculus envelope glycoprotein-like (LOC101055780), mRNA [XM_003945589]		XM_003945589	Mm.326532	101055780	334.848	1685.07	8.36707	9.74695	334.786	336.552	333.206	1664.05	1704.69	1686.48	8.34338	8.399	8.35883	9.74756	9.7601	9.7332
A_55_P2135895	1.85768e-07	2.03812e-06	16.5632	up	XR_140995	chr10:114753349-114753408	Gm10752	PREDICTED: Mus musculus predicted gene 10752 (Gm10752), misc_RNA [XR_140995]		XR_140995	Mm.253345	100038558	8.54097	220.055	2.74959	6.79949	9.86349	8.43215	7.32727	216.411	222.398	221.356	2.85621	2.69406	2.69849	6.79355	6.81276	6.79217
A_55_P2119155	1.89916e-07	2.067e-06	3.66224	up	NM_001204875	chr2:29925091-29925150	Set	Mus musculus SET nuclear oncogene (Set), transcript variant 2, mRNA [NM_001204875]	GO:0043234|GO:0048471|GO:0043524|GO:0005737|GO:0005783|GO:0006334|GO:0005634|GO:0045892|GO:0003677	NM_001204875	Mm.335942	56086	756.851	5339.68	9.64973	11.5225	776.943	724.52	769.09	5217.62	5352.3	5449.13	9.667	9.60451	9.67768	11.5039	11.5246	11.5389
A_66_P111689	1.90689e-07	2.07015e-06	3.00852	up	XM_001003736	chr3:123995364-123995423	Gm9372	PREDICTED: Mus musculus predicted gene 9372 (Gm9372), mRNA [XM_001003736]		XM_001003736		668809	1059.44	6250.43	10.1879	11.7769	1095.45	1017.51	1065.35	6135	6295.13	6321.16	10.2088	10.1498	10.205	11.7597	11.7918	11.7793
A_51_P101375	1.90754e-07	2.07015e-06	2.92303	up	NM_145933	chr16:23358405-23358465	St6gal1	Mus musculus beta galactoside alpha 2,6 sialyltransferase 1 (St6gal1), transcript variant 1, mRNA [NM_145933]	GO:0030173|GO:0008373|GO:0005794|GO:0016020|GO:0016757|GO:0006486|GO:0005576|GO:0016021|GO:0016740|GO:0003835	NM_145933	Mm.149029	20440	67.7989	333.697	5.82448	7.37195	69.0937	68.6943	65.6086	330.675	333.143	337.274	5.83919	5.84978	5.78448	7.37536	7.36355	7.37693
A_51_P246773	1.92015e-07	2.07567e-06	2.9561	up	NM_030261	chr9:14130452-14130511	Sesn3	Mus musculus sestrin 3 (Sesn3), mRNA [NM_030261]	GO:0032868|GO:0003674|GO:0007050|GO:0005634|GO:0042593|GO:0005575|GO:0051896	NM_030261	Mm.439776	75747	1111.02	6463.23	10.2629	11.8266	1157.8	1073.94	1101.34	6415.55	6453.11	6521.03	10.3033	10.2333	10.2523	11.8268	11.8245	11.8286
A_52_P325443	1.92327e-07	2.07702e-06	3.8276	up	NM_172525	chr3:121718781-121718840	Arhgap29	Mus musculus Rho GTPase activating protein 29 (Arhgap29), mRNA [NM_172525]	GO:0035556|GO:0005622|GO:0005515|GO:0007165|GO:0046872|GO:0005096	NM_172525	Mm.229287	214137	54.7765	340.116	5.46146	7.3979	56.43	54.3068	53.5927	340.282	346.522	333.542	5.49437	5.44757	5.44242	7.41771	7.41801	7.35797
A_52_P592951	1.92375e-07	2.07702e-06	2.12314	up	NM_025509	chr3:130406398-130406339	Ostc	Mus musculus oligosaccharyltransferase complex subunit (Ostc), mRNA [NM_025509]	GO:0008150|GO:0003674|GO:0016020|GO:0016021|GO:0008250	NM_025509	Mm.300697	66357	2178.3	9160.45	11.3112	12.3974	2207.96	2175.62	2151.31	9218.69	9146.1	9116.55	11.3084	11.3302	11.295	12.4155	12.3968	12.3798
A_51_P223709	1.92918e-07	2.08158e-06	2.09698	up	NM_080850	chr1:95206556-95206497	Pask	Mus musculus PAS domain containing serine/threonine kinase (Pask), mRNA [NM_080850]	GO:0005794|GO:0005634|GO:0005524|GO:0045719|GO:0008289|GO:0005622|GO:0016310|GO:0007165|GO:0043576|GO:0005737|GO:0046777|GO:0004672|GO:0000166|GO:0004674|GO:0016301|GO:0006468|GO:0004871|GO:0035091|GO:2000505|GO:0070092|GO:0016740|GO:0016772	NM_080850	Mm.379454	269224	29.833	88.705	4.48829	5.55661	29.9874	30.7701	28.7415	87.4023	88.5178	90.1949	4.49008	4.51086	4.46393	5.55622	5.54897	5.56463
A_52_P152952	1.94111e-07	2.08932e-06	2.50717	up	NM_027203	chr7:3614452-3614393	Leng1	Mus musculus leukocyte receptor cluster (LRC) member 1 (Leng1), mRNA [NM_027203]	GO:0008150|GO:0003674|GO:0005575	NM_027203	Mm.389782	69757	128.048	597.332	6.8683	8.19436	132.182	126.945	125.018	590.599	593.09	608.306	6.89994	6.85749	6.84747	8.19677	8.18015	8.20616
A_51_P108190	1.94774e-07	2.09432e-06	2.05041	up	NM_022891	chr11:97638976-97638917	Rpl23	Mus musculus ribosomal protein L23 (Rpl23), mRNA [NM_022891]	GO:0005515|GO:0005737|GO:0003735|GO:0022626|GO:0030529|GO:0005730|GO:0005840|GO:0022625|GO:0006412	NM_022891	Mm.140380	65019	2749.17	11094.7	11.6582	12.6941	2784.23	2760.51	2702.78	11049.9	11055.5	11178.9	11.6551	11.683	11.6366	12.6985	12.6873	12.6966
A_55_P2178608	1.973e-07	2.11711e-06	2.39525	up		chr13:109954532-109954591							341.767	1579.51	8.39918	9.65936	344.217	343.195	337.89	1562.07	1573.79	1602.69	8.38311	8.43257	8.38186	9.6599	9.65382	9.66435
A_55_P2156460	1.97799e-07	2.11711e-06	4.66253	up	U90515	chr14:54158222-54158281		Mus musculus V alpha F3.8, T cell receptor alpha chain mRNA, partial cds. [U90515]			Mm.304290		75.4363	608.892	6.00011	8.22123	75.341	74.735	76.2327	587.69	604.57	634.416	5.97826	5.98943	6.03265	8.18535	8.20919	8.26914
A_55_P2147121	1.9892e-07	2.12391e-06	3.19822	up	AK038822	chr1:44220513-44220572	Ercc5	Mus musculus adult male hypothalamus cDNA, RIKEN full-length enriched library, clone:A230065O19 product:excision repair cross-complementing rodent repair deficiency,complementation group 5, full insert sequence. [AK038822]	GO:0009650|GO:0016788|GO:0005634|GO:0003824|GO:0008340|GO:0046872|GO:0042803|GO:0003690|GO:0003697|GO:0006295|GO:0035264|GO:0009411|GO:0043066|GO:0000405|GO:0004520|GO:0003677|GO:0006974|GO:0004518|GO:0010225|GO:0047485|GO:0006281|GO:0004519|GO:0016787|GO:0006283|GO:0016591|GO:0006289|GO:0005675		Mm.2213	22592	62.7598	332.761	5.6921	7.36937	64.535	61.5171	62.2274	333.61	331.743	332.931	5.72284	5.65631	5.69714	7.39273	7.35923	7.35615
A_55_P1978521	1.99109e-07	2.12464e-06	2.52371	up	NM_001039646	chr5:105644812-105644753	Gbp10	Mus musculus guanylate-binding protein 10 (Gbp10), mRNA [NM_001039646]	GO:0003674|GO:0071222|GO:0071346|GO:0050830|GO:0042832|GO:0031410	NM_001039646	Mm.275893	626578	237.185	1152.97	7.82668	9.16223	237.733	239.577	234.246	1137.44	1153.05	1168.42	7.8079	7.86104	7.81111	9.15313	9.16173	9.17183
A_55_P2166488	2.00647e-07	2.13773e-06	2.50616	up	NM_009851	chr2:102678030-102677971	Cd44	Mus musculus CD44 antigen (Cd44), transcript variant 1, mRNA [NM_009851]	GO:0051219|GO:0005515|GO:0005154|GO:0001658|GO:0005886|GO:0034238|GO:0050731|GO:0005634|GO:0001558|GO:0031175|GO:0016323|GO:0033138|GO:0016324|GO:0005540|GO:0002906|GO:0034116|GO:0070374|GO:0043154|GO:0007155|GO:0002821|GO:0016055|GO:1900625|GO:0033031|GO:0043066|GO:0009986|GO:0019901|GO:0002246|GO:0044344|GO:0060442|GO:0010628|GO:0043234|GO:0019955|GO:0016020|GO:0016477|GO:0070487|GO:0043518|GO:…	NM_009851	Mm.423621	12505	105.358	480.04	6.54791	7.87339	106.666	106.278	103.13	472.589	477.284	490.247	6.5432	6.57735	6.52318	7.8682	7.86205	7.88991
A_55_P1978994	2.01153e-07	2.14102e-06	2.7145	up	JX120199	chr12:114668187-114668128		Mus musculus strain C57BL/6 clone 249 immunoglobulin heavy chain mRNA, partial cds. [JX120199]			Mm.491642		300.891	1555.25	8.19492	9.63561	300.302	304.831	297.541	1544.61	1554.88	1566.27	8.17005	8.23278	8.18193	9.64177	9.63396	9.6311
A_55_P2115127	2.01555e-07	2.14421e-06	2.48012	up	NM_026483	chr7:71532395-71532336	Mphosph10	Mus musculus M-phase phosphoprotein 10 (U3 small nucleolar ribonucleoprotein) (Mphosph10), mRNA [NM_026483]	GO:0003674|GO:0005694|GO:0042254|GO:0030529|GO:0010923|GO:0006364|GO:0005730|GO:0005634	NM_026483	Mm.26973	67973	108.423	491.242	6.59763	7.90804	108.283	108.32	108.665	481.081	500.698	491.947	6.56992	6.60821	6.61476	7.89643	7.92988	7.8978
A_51_P455266	2.01889e-07	2.14559e-06	2.21335	up	NM_009066	chr17:34158223-34158164	Ring1	Mus musculus ring finger protein 1 (Ring1), mRNA [NM_009066]	GO:0035102|GO:0031519|GO:0005515|GO:0035518|GO:0004842|GO:0006355|GO:0016574|GO:0016874|GO:0000151|GO:0005634|GO:0048593|GO:0009952|GO:0001739|GO:0046872|GO:0006351|GO:0016604|GO:0005737|GO:0003682|GO:0008270|GO:0045892|GO:0016568	NM_009066	Mm.20343	19763	86.3391	333.603	6.22583	7.37206	87.17	84.7576	87.0896	324.712	336.57	339.526	6.21979	6.21031	6.24738	7.3508	7.37901	7.38637
A_51_P426633	2.02375e-07	2.14859e-06	2.26329	up	NM_153806	chr3:121987377-121987989	Dnttip2	Mus musculus deoxynucleotidyltransferase, terminal, interacting protein 2 (Dnttip2), mRNA [NM_153806]	GO:0008150|GO:0003674|GO:0006355|GO:0005730|GO:0005634|GO:0006351	NM_153806	Mm.398647	99480	3314.62	14594.5	11.9296	13.108	3313.9	3326.91	3303.05	14502	14673.6	14608.1	11.9076	11.9573	11.9238	13.1011	13.1206	13.1022
A_55_P2138104	2.02481e-07	2.14863e-06	8.3196	up	AK089567	chr9:3017151-3017210		predicted gene 10720 [Source:MGI Symbol;Acc:MGI:3641687] [ENSMUST00000099050]					315.191	4633.88	8.26652	11.323	319.307	323.942	302.324	4486.59	4730.12	4684.93	8.26064	8.33366	8.20526	11.2895	11.3525	11.3271
A_55_P2178898	2.02962e-07	2.15238e-06	11.2312	up	NM_001033391	chr10:3434869-3434928	Ipcef1	Mus musculus interaction protein for cytohesin exchange factors 1 (Ipcef1), transcript variant 4, mRNA [NM_001033391]	GO:0005737|GO:0016020|GO:0005886|GO:0033126|GO:0019904|GO:0005829	NM_001033391	Mm.331674	320495	46.4404	834.529	5.18925	8.67869	46.4321	44.7724	48.1169	820.45	830.745	852.391	5.18164	5.11274	5.27337	8.6737	8.66668	8.69569
A_66_P135194	2.04151e-07	2.15922e-06	3.91281	up	NM_153566	chr4:124531204-124531721	Yrdc	Mus musculus yrdC domain containing (E.coli) (Yrdc), mRNA [NM_153566]	GO:0005739|GO:0005515|GO:0003725|GO:0016020|GO:0051051	NM_153566	Mm.258568	230734	446.239	3330.01	8.82223	10.7904	467.906	429.605	441.205	3333.83	3311.79	3344.4	8.87193	8.79139	8.80337	10.8089	10.7805	10.7819
A_55_P2072955	2.04377e-07	2.15922e-06	2.68024	up	NM_172738	chr7:7068346-7068287	Zfp954	Mus musculus zinc finger protein 954 (Zfp954), mRNA [NM_172738]	GO:0008150|GO:0003674|GO:0005575|GO:0046872	NM_172738	Mm.23838	232853	146.888	741.702	7.08648	8.50885	149.529	142.908	148.228	722.809	743.879	758.417	7.09131	7.05612	7.11202	8.49045	8.50977	8.52632
A_52_P117197	2.05263e-07	2.16504e-06	3.25727	up	NM_027497	chr18:6439896-6439837	Epc1	Mus musculus enhancer of polycomb homolog 1 (Drosophila) (Epc1), transcript variant 2, mRNA [NM_027497]	GO:0006355|GO:0031965|GO:0005634|GO:0000122|GO:0006351|GO:0032777|GO:0043967|GO:0045944|GO:0045814|GO:0043968|GO:0035267|GO:0051155|GO:0005654|GO:0045892|GO:0004402|GO:0040008|GO:0016568	NM_027497	Mm.312133	13831	190.146	1179.16	7.49294	9.1966	196.363	182.153	191.92	1164.96	1183.38	1189.14	7.51877	7.44692	7.51313	9.19218	9.19815	9.19947
A_55_P1979605	2.0571e-07	2.16556e-06	2.21935	up	NM_145380	chr2:104839935-104839876	Eif3m	Mus musculus eukaryotic translation initiation factor 3, subunit M (Eif3m), mRNA [NM_145380]	GO:0008150|GO:0003674|GO:0005737|GO:0005852|GO:0003743|GO:0006412|GO:0006413	NM_145380	Mm.379278	98221	10047.6	35929.8	13.5612	14.7113	10246.2	9759.14	10137.5	36209.4	35792.6	35787.5	13.5629	13.5339	13.5867	14.7125	14.7049	14.7166
A_51_P125135	2.0582e-07	2.16556e-06	2.1132	up	NM_026410	chr19:6091709-6091768	Cdca5	Mus musculus cell division cycle associated 5 (Cdca5), mRNA [NM_026410]	GO:0005515|GO:0007076|GO:0000790|GO:0005886|GO:0005694|GO:0051329|GO:0005634|GO:0071922|GO:0006302|GO:0008278|GO:0000082|GO:0005737|GO:0007049|GO:0007067|GO:0007080|GO:0051301|GO:0007064	NM_026410	Mm.23526	67849	79.7194	290.391	6.09702	7.17644	79.5676	80.4415	79.1491	287.55	290.517	293.107	6.0697	6.1185	6.10286	7.18235	7.17437	7.17261
A_55_P2413378	2.05859e-07	2.16556e-06	2.11612	up	AK148615	chr12:79710910-79710969		Mus musculus 2 days neonate sympathetic ganglion cDNA, RIKEN full-length enriched library, clone:7120423E20 product:hypothetical protein, full insert sequence. [AK148615]			Mm.448181		30.94	92.9518	4.54164	5.62306	31.3475	31.0628	30.4096	92.7795	93.3224	92.7536	4.55693	4.52621	4.54178	5.64324	5.6234	5.60253
A_55_P1963645	2.05921e-07	2.16556e-06	3.07954	up		chr7:024848921-024848980							479.971	2854.59	8.93879	10.5615	484.386	470.042	485.485	2757.25	2885.28	2921.24	8.93168	8.9288	8.95589	10.5209	10.58	10.5836
A_55_P2001948	2.06209e-07	2.16632e-06	2.01907	up	NM_026908	chr14:60166091-60166150	Cab39l	Mus musculus calcium binding protein 39-like (Cab39l), mRNA [NM_026908]	GO:0008150|GO:0003674|GO:0005575	NM_026908	Mm.179091	69008	896.7	3677.45	9.93491	10.9486	914.434	886.364	889.303	3621.39	3736.83	3674.13	9.93582	9.9484	9.92051	10.9423	10.9704	10.9331
A_55_P1962906	2.0736e-07	2.16971e-06	2.55327	up	NM_001146060	chr9:110802956-110803015	Als2cl	Mus musculus ALS2 C-terminal like (Als2cl), transcript variant 1, mRNA [NM_001146060]	GO:0005515|GO:0017112|GO:0017137|GO:0005737|GO:0008104|GO:0035023|GO:0016023|GO:0007032|GO:0005089|GO:0042802|GO:0005096	NM_001146060	Mm.86338	235633	1906.41	9486.32	11.1013	12.4536	1933.95	1913.73	1871.56	9393.39	9475.59	9589.99	11.0956	11.1342	11.074	12.4451	12.4518	12.4639
A_55_P2144436	2.08206e-07	2.16998e-06	2.17855	up	NM_010925	chr10:77864705-77864646	Rrp1	Mus musculus ribosomal RNA processing 1 homolog (S. cerevisiae) (Rrp1), mRNA [NM_010925]	GO:0006364|GO:0005730|GO:0005634|GO:0030688	NM_010925	Mm.38344	18114	325.259	1376.96	8.31833	9.44169	329.055	324.228	322.495	1380.87	1357.62	1392.39	8.31195	8.33542	8.3076	9.46009	9.4174	9.44758
A_52_P188042	2.08311e-07	2.16998e-06	2.85806	up	NM_198297	chr16:48735020-48734961	Trat1	Mus musculus T cell receptor associated transmembrane adaptor 1 (Trat1), mRNA [NM_198297]	GO:0003674|GO:0016020|GO:0005886|GO:0042101|GO:0001920|GO:0016021|GO:0050862|GO:0051051|GO:0050850	NM_198297	Mm.167298	77647	659.658	3666.31	9.43045	10.9455	680.727	639.841	658.407	3690.29	3602.29	3706.34	9.4557	9.40505	9.4306	10.9695	10.919	10.9479
A_52_P185343	2.08541e-07	2.17131e-06	3.23912	up	AK011851	chr11:109241587-109241646	Gna13	guanine nucleotide binding protein, alpha 13 [Source:MGI Symbol;Acc:MGI:95768] [ENSMUST00000106702]	GO:0005515|GO:0007264|GO:0008360|GO:0003924|GO:0031526|GO:0007266|GO:0031702|GO:0007204|GO:0046872|GO:0007243|GO:0030154|GO:0005622|GO:0000166|GO:0004871|GO:0031584|GO:0030334|GO:0001569|GO:0001664|GO:0005834|GO:0030168|GO:0001525|GO:0031683|GO:0005525|GO:0001701|GO:0031234|GO:0006184|GO:0007165|GO:0019001|GO:0007186|GO:0016020|GO:0031752|GO:0007189		Mm.193925	14674	3453.89	20666.5	11.9943	13.6899	3499.61	3357.41	3504.64	20168.9	20829.5	21001	11.9886	11.9727	12.0214	13.6535	13.7092	13.7069
A_52_P252425	2.09451e-07	2.17562e-06	2.06451	up	NM_026529	chr18:24635876-24635935	2700062C07Rik	Mus musculus RIKEN cDNA 2700062C07 gene (2700062C07Rik), mRNA [NM_026529]	GO:0008150|GO:0003674|GO:0005575	NM_026529	Mm.276574	68046	306.588	1233.36	8.22252	9.26832	308.626	308.001	303.137	1211.75	1240.22	1248.11	8.21102	8.24876	8.20779	9.25719	9.27515	9.27264
A_55_P2109857	2.09576e-07	2.17562e-06	2.59245	up	NM_009061	chr1:145848889-145848830	Rgs2	Mus musculus regulator of G-protein signaling 2 (Rgs2), mRNA [NM_009061]	GO:0005515|GO:0043005|GO:0005886|GO:0038032|GO:0005634|GO:0005829|GO:0060087|GO:0010614|GO:0005737|GO:0060452|GO:0043407|GO:0009968|GO:0031116|GO:0045744|GO:0048487|GO:0010519|GO:0006417|GO:0043547|GO:0007049|GO:0007186|GO:0016020|GO:0050873|GO:0009898|GO:0055119|GO:0071877|GO:0005096	NM_009061	Mm.28262	19735	7630.86	32771.6	13.163	14.5373	7819.71	7546.27	7526.59	33605.2	32498.5	32211.2	13.1673	13.1707	13.151	14.5674	14.5387	14.5059
A_51_P418420	2.10036e-07	2.17824e-06	2.22359	up	NM_010028	chrX:12868968-12869027	Ddx3x	Mus musculus DEAD/H (Asp-Glu-Ala-Asp/His) box polypeptide 3, X-linked (Ddx3x), mRNA [NM_010028]	GO:0005515|GO:0017148|GO:0048027|GO:0030308|GO:0030307|GO:0007243|GO:0000166|GO:0032508|GO:0043024|GO:0005852|GO:0042256|GO:0071470|GO:0042254|GO:2001243|GO:0043280|GO:0034063|GO:0010501|GO:0045087|GO:0071243|GO:0008134|GO:0008625|GO:0035613|GO:1900087|GO:0006200|GO:0010494|GO:0003723|GO:0005634|GO:0005741|GO:0004004|GO:0005739|GO:0005737|GO:0007059|GO:0004003|GO:0031333|GO:0045944|GO:0008143|GO:…	NM_010028	Mm.289662	13205	3349.43	14519.5	11.9444	13.0973	3347.67	3341.91	3358.72	14384.7	14459.9	14714.1	11.9194	11.9634	11.9505	13.0815	13.0984	13.1121
A_55_P1971220	2.10473e-07	2.18062e-06	2.10824	up	NM_001081103	chr5:54509929-54509988	Stim2	Mus musculus stromal interaction molecule 2 (Stim2), mRNA [NM_001081103]	GO:0005515|GO:0005886|GO:0051928|GO:0005246|GO:0005783|GO:0005509|GO:0006874|GO:0032237|GO:0016020|GO:0070588|GO:0006810|GO:0006816|GO:0015279|GO:0016021|GO:0006811	NM_001081103	Mm.265985	116873	317.767	1298.13	8.27587	9.35191	324.416	311.259	317.627	1282.78	1319.76	1291.84	8.28438	8.26287	8.28037	9.35151	9.37492	9.32931
A_51_P249867	2.10592e-07	2.18079e-06	3.02516	up	NM_026382	chr13:38309317-38312568	Snrnp48	Mus musculus small nuclear ribonucleoprotein 48 (U11/U12) (Snrnp48), mRNA [NM_026382]	GO:0008380|GO:0006397|GO:0008150|GO:0003674|GO:0005737|GO:0005681|GO:0005634|GO:0046872|GO:0005689	NM_026382	Mm.250783	67797	299.951	1736.08	8.18905	9.78606	307.934	289.761	302.159	1747.16	1715.1	1745.97	8.20873	8.15554	8.20289	9.81337	9.76749	9.77733
A_55_P2186978	2.11411e-07	2.18603e-06	2.17875	up	U19317	chr6:69349865-69349806		immunoglobulin kappa variable 4-62 [Source:MGI Symbol;Acc:MGI:3643587] [ENSMUST00000177795]			Mm.457994		986.945	4300.02	10.0827	11.2062	993.712	991.56	975.563	4278.5	4295.82	4325.73	10.069	10.1131	10.066	11.2109	11.2043	11.2033
A_52_P73848	2.12594e-07	2.19503e-06	2.62119	up	NM_001045520	chr11:45721510-45722465	Clint1	Mus musculus clathrin interactor 1 (Clint1), mRNA [NM_001045520]	GO:0005737|GO:0005794|GO:0016020|GO:0030276|GO:0030136|GO:0031410|GO:0048268|GO:0008289|GO:0006897	NM_001045520	Mm.169673	216705	296.596	1482.46	8.1705	9.56072	294.867	295.621	299.301	1447.13	1491.25	1509	8.14002	8.18293	8.18855	9.53806	9.57047	9.57364
A_52_P279184	2.14022e-07	2.20519e-06	4.48328	up	NM_011899	chr12:56190256-56191171	Srp54a	Mus musculus signal recognition particle 54A (Srp54a), mRNA [NM_011899]	GO:0005786|GO:0005737|GO:0030942|GO:0008144|GO:0006614|GO:0008312|GO:0043021|GO:0005730|GO:0003924|GO:0005634|GO:0019003|GO:0005525	NM_011899	Mm.471968	24067	286.744	2415.09	8.11667	10.2812	291.914	276.095	292.223	2443.77	2405.09	2396.42	8.1232	8.07248	8.15433	10.3145	10.2756	10.2536
A_52_P486702	2.14241e-07	2.20519e-06	2.68132	up	NM_013716	chr11:55312117-55312967	G3bp1	Mus musculus GTPase activating protein (SH3 domain) binding protein 1 (G3bp1), mRNA [NM_013716]	GO:0005515|GO:0005886|GO:0010494|GO:0003723|GO:0004386|GO:0005634|GO:0003676|GO:0003729|GO:0003677|GO:0005524|GO:0005622|GO:0004518|GO:0005737|GO:0004519|GO:0016787|GO:0016020|GO:0000166|GO:0006810|GO:0090090	NM_013716	Mm.380129	27041	549.464	2875.38	9.14858	10.5715	558.62	542.798	546.973	2913.04	2864.38	2848.71	9.15465	9.14824	9.14285	10.6073	10.566	10.5413
A_66_P103232	2.18364e-07	2.23734e-06	2.35248	up	U88691	chr6:69725978-69725919		Mus musculus anti-DNA antibody light chain variable region mRNA, partial cds. [U88691]			Mm.423856		201.123	908.197	7.57795	8.81214	206.035	193.922	203.413	899.874	904.422	920.295	7.59291	7.54516	7.59578	8.81579	8.80298	8.81765
A_55_P2133248	2.20981e-07	2.25178e-06	3.47788	up	XR_001627	chr7:113648182-113648123	Gm8995	PREDICTED: Mus musculus predicted gene 8995 (Gm8995), misc_RNA [XR_001627]		XR_001627	Mm.300542	668139	2758.91	17788.6	11.6628	13.461	2746.64	2784.48	2745.62	18053.4	17639.1	17673.2	11.631	11.695	11.6624	13.4927	13.4543	13.436
A_52_P671661	2.21341e-07	2.25327e-06	2.10864	up	NM_026453	chr8:32270968-32270909	Mak16	Mus musculus MAK16 homolog (S. cerevisiae) (Mak16), mRNA [NM_026453]	GO:0008150|GO:0003674|GO:0005634|GO:0005575	NM_026453	Mm.289818	67920	508.508	2145.95	9.02742	10.1037	519.115	493.99	512.418	2112.66	2134.75	2190.42	9.03484	9.00696	9.04045	10.0948	10.0913	10.1251
A_52_P305685	2.21842e-07	2.2566e-06	4.4791	up		chr13:099383653-099383712							68.3037	521.955	5.83654	7.99975	67.1138	67.9445	69.8528	520.57	525.55	519.747	5.79175	5.83047	5.88741	8.01379	8.00816	7.97731
A_55_P2136880	2.22099e-07	2.2577e-06	3.57875	up	NM_008654	chr7:52778379-52778320	Ppp1r15a	Mus musculus protein phosphatase 1, regulatory (inhibitor) subunit 15A (Ppp1r15a), mRNA [NM_008654]	GO:0019901|GO:0005783|GO:0006950|GO:0006915|GO:0006417|GO:0030968	NM_008654	Mm.4048	17872	6480.7	36431.7	12.8979	14.7374	6620.3	6230.98	6590.82	36600.7	36475.8	36218.8	12.906	12.8517	12.936	14.7289	14.7502	14.7329
A_52_P641922	2.22882e-07	2.26457e-06	2.30993	up	NM_172501	chr3:53256411-53256352	Nhlrc3	Mus musculus NHL repeat containing 3 (Nhlrc3), mRNA [NM_172501]	GO:0008150|GO:0003674|GO:0005575	NM_172501	Mm.85744	212114	79.3909	316.561	6.08945	7.29729	80.1962	80.1722	77.8042	309.046	315.564	325.075	6.08388	6.11281	6.07165	7.28203	7.29	7.31985
A_55_P2129316	2.23053e-07	2.26521e-06	2.21126	up		chr15:75066159-75066100		predicted pseudogene 10238 [Source:MGI Symbol;Acc:MGI:3641620] [ENSMUST00000089689]					583.346	2582.9	9.23724	10.3821	590.593	571.507	587.937	2509.33	2604.53	2634.83	9.22914	9.23101	9.25155	10.3539	10.3934	10.399
A_52_P160518	2.2493e-07	2.26688e-06	2.18371	up	NM_019460	chr14:31615835-31623518	Sfmbt1	Mus musculus Scm-like with four mbt domains 1 (Sfmbt1), transcript variant 3, mRNA [NM_019460]	GO:0048635|GO:0042393|GO:0006355|GO:0005634|GO:0007283|GO:0045892|GO:0030154|GO:0006351|GO:0016568	NM_019460	Mm.294662	54650	25.4355	77.4776	4.23241	5.35919	25.6529	25.865	24.7886	76.0468	79.4071	76.9791	4.23664	4.22912	4.23148	5.35921	5.38607	5.33229
A_55_P2001274	2.24988e-07	2.26688e-06	2.09878	up	AY114394	chr12:116996378-116996319		Mus musculus isolate IgMus1111-3 immunoglobulin heavy chain mRNA, partial cds. [AY114394]			Mm.304472		175.916	708.144	7.37499	8.44454	178.139	176.009	173.601	695.864	703.498	725.069	7.37148	7.3976	7.35588	8.4395	8.43286	8.46125
A_55_P2069995	2.25016e-07	2.26688e-06	2.46279	up		chr6:145264785-145264726							230.452	1094.08	7.78405	9.08435	238.159	222.159	231.038	1077.32	1092.94	1111.98	7.81059	7.75046	7.7911	9.0804	9.08085	9.0918
A_55_P2034570	2.25093e-07	2.26688e-06	2.53648	up	NM_007916	chr8:113499988-113499929	Ddx19a	Mus musculus DEAD (Asp-Glu-Ala-Asp) box polypeptide 19a (Ddx19a), mRNA [NM_007916]	GO:0008026|GO:0043065|GO:0003723|GO:0004386|GO:0005634|GO:0003676|GO:0015031|GO:0005524|GO:0005737|GO:0000166|GO:0016020|GO:0016787|GO:0005643|GO:0006810|GO:0051028	NM_007916	Mm.287901	13680	301.682	1464.17	8.19783	9.54066	311.039	291.061	302.946	1451.24	1467.42	1473.86	8.2237	8.16246	8.20734	9.54178	9.5466	9.5336
A_55_P1982334	2.29657e-07	2.29851e-06	2.05254	up	NM_025431	chr10:119668573-119668632	Llph	Mus musculus LLP homolog, long-term synaptic facilitation (Aplysia) (Llph), mRNA [NM_025431]	GO:0008150|GO:0003674|GO:0005575	NM_025431	Mm.291755	66225	3967.79	15823.6	12.2089	13.2463	3990.71	3899.35	4013.3	15869.8	15934.4	15666.6	12.1974	12.2033	12.2261	13.2539	13.2615	13.2236
A_55_P2029549	2.3053e-07	2.30063e-06	2.09859	up	NM_025314	chr2:144594350-144594409	Dtd1	Mus musculus D-tyrosyl-tRNA deacylase 1 (Dtd1), mRNA [NM_025314]	GO:0006260|GO:0008150|GO:0003674|GO:0005737|GO:0016787|GO:0016788|GO:0005730|GO:0005634|GO:0019478|GO:0003677|GO:0046872	NM_025314	Mm.28109	66044	1787.59	7452.33	10.9989	12.0683	1783.72	1765.6	1813.45	7344.21	7474.45	7538.33	10.9741	11.0046	11.0179	12.0534	12.0742	12.0774
A_52_P581326	2.30633e-07	2.30063e-06	2.33756	up	NM_001081218	chr10:82197189-82201045	Hcfc2	Mus musculus host cell factor C2 (Hcfc2), mRNA [NM_001081218]	GO:0003674|GO:0005737|GO:0000122	NM_001081218	Mm.127405	67933	73.7992	292.956	5.96474	7.18974	74.5314	72.4065	74.4597	292.424	289.933	296.51	5.96029	5.94324	5.99069	7.20602	7.17127	7.19193
A_55_P1998854	2.30698e-07	2.30063e-06	4.12722	up									90.7735	665.924	6.30618	8.35135	94.797	87.3607	90.1627	657.521	675.328	664.921	6.35513	6.26212	6.30129	8.35163	8.36799	8.33444
A_51_P269320	2.31383e-07	2.30419e-06	2.47081	up	NM_009634	chr15:80796591-80797579	Adsl	Mus musculus adenylosuccinate lyase (Adsl), mRNA [NM_009634]	GO:0051262|GO:0007584|GO:0070626|GO:0004018|GO:0009152|GO:0003824|GO:0009156|GO:0016829|GO:0005829|GO:0005739|GO:0009060|GO:0005737|GO:0006167|GO:0006163|GO:0006164	NM_009634	Mm.38151	11564	447.129	2180.39	8.82697	10.132	461.085	435.441	444.86	2193.45	2169.23	2178.5	8.85105	8.81358	8.81629	10.1592	10.1216	10.1151
A_55_P1993463	2.31515e-07	2.30441e-06	3.3832	up									94.069	568.941	6.36337	8.12176	97.6296	91.4059	93.1715	557.997	578.476	570.349	6.40292	6.32975	6.35745	8.10958	8.14648	8.10923
A_55_P2049141	2.31852e-07	2.30544e-06	2.01031	up	NM_172974	chr1:88503010-88503069	Cops7b	Mus musculus COP9 (constitutive photomorphogenic) homolog, subunit 7b (Arabidopsis thaliana) (Cops7b), mRNA [NM_172974]	GO:0003674|GO:0005737|GO:0008180|GO:0010388|GO:0005634	NM_172974	Mm.12973	26895	242.596	942.4	7.85863	8.86604	249.157	234.194	244.436	932.946	942.597	951.658	7.87028	7.83066	7.87495	8.86387	8.86529	8.86898
A_55_P1969530	2.31947e-07	2.30544e-06	2.40057	up	NM_011980	chr7:30946346-30946287	Zfp146	Mus musculus zinc finger protein 146 (Zfp146), mRNA [NM_011980]	GO:0005737|GO:0005730|GO:0005634|GO:0003676|GO:0003677|GO:0046872	NM_011980	Mm.456449	26465	56.9882	218.99	5.52933	6.79271	58.6061	56.2821	56.0764	218.477	217.149	221.344	5.55589	5.50537	5.52673	6.81047	6.77595	6.7917
A_51_P487219	2.3211e-07	2.30597e-06	3.13513	up	NM_012018	chr2:35002808-35002867	Cep110	Mus musculus centrosomal protein 110 (Cep110), transcript variant 1, mRNA [NM_012018]	GO:0008150|GO:0003674|GO:0007049|GO:0005813|GO:0005737|GO:0005856|GO:0051301	NM_012018	Mm.231332	26920	23.9314	104.098	4.13016	5.77868	23.4792	24.9684	23.3464	100.661	105.783	105.851	4.09423	4.15751	4.13874	5.75384	5.80034	5.78186
A_55_P1994477	2.32595e-07	2.30861e-06	3.98234	up	NM_001081290	chr1:164603081-164603022	Prrc2c	Mus musculus proline-rich coiled-coil 2C (Prrc2c), mRNA [NM_001081290]	GO:0008150|GO:0005575|GO:0008022	NM_001081290	Mm.245446	226562	480.534	3641.65	8.94018	10.9338	480.505	488.14	472.957	3559.76	3653.84	3711.35	8.9149	8.99119	8.91445	10.9117	10.9392	10.9505
A_55_P2010364	2.33043e-07	2.31196e-06	2.80692	up	XM_003945774	chr7:33280990-33281049	LOC101056169	PREDICTED: Mus musculus 60S ribosomal protein L23a-like (LOC101056169), mRNA [XM_003945774]		XM_003945774		101056169	123.209	640.008	6.80718	8.29617	122.289	123.936	123.403	624.496	653.257	642.272	6.77633	6.81798	6.82725	8.27919	8.32363	8.2857
A_51_P371485	2.33482e-07	2.31306e-06	2.33398	up	NM_198017	chr7:140072455-140072514	Fam175b	Mus musculus family with sequence similarity 175, member B (Fam175b), mRNA [NM_198017]	GO:0005515|GO:0005737|GO:0070552|GO:0005634|GO:0071497|GO:0031593	NM_198017	Mm.274824	109359	108.61	463.126	6.6021	7.82489	108.533	108	109.297	461.289	463.636	464.453	6.57477	6.60315	6.62836	7.8383	7.82382	7.81255
A_66_P100268	2.34597e-07	2.31868e-06	2.40971	up	AK087888	chr18:9928488-9928429		Mus musculus 2 days pregnant adult female ovary cDNA, RIKEN full-length enriched library, clone:E330037F14 product:similar to HYPOTHETICAL PROTEIN ORF-1137 [Mus musculus], full insert sequence. [AK087888]					169.526	778.935	7.31146	8.58032	172.641	166.885	169.053	754.877	777.215	804.715	7.3239	7.29958	7.31091	8.55435	8.57594	8.61068
A_66_P102346	2.34602e-07	2.31868e-06	2.65874	up	U41438	chr6:68221019-68221078		Mus musculus monoclonal antibody FG1 to cardiolipin, Ig light chain variable region mRNA, partial cds. [U41438]			Mm.333124		684.699	3566.61	9.48777	10.8985	679.127	685.317	689.654	3533.86	3569.77	3596.21	9.45106	9.5191	9.49316	10.897	10.8998	10.8987
A_55_P2166572	2.35156e-07	2.32305e-06	2.05616	up	NM_009261	chr2:37439139-37439080	Strbp	Mus musculus spermatid perinuclear RNA binding protein (Strbp), mRNA [NM_009261]	GO:0003725|GO:0003727|GO:0003723|GO:0007286|GO:0006928|GO:0005634|GO:0007275|GO:0007283|GO:0003677|GO:0030154|GO:0005737|GO:0015630|GO:0007638|GO:0005856	NM_009261	Mm.237095	20744	619.196	2556.04	9.32865	10.3686	636.893	599.146	621.548	2504.68	2586.65	2576.77	9.34549	9.30681	9.33363	10.3522	10.3838	10.3698
A_55_P2109505	2.35439e-07	2.32305e-06	2.35662	up		chr17:082939483-082939542							12403.1	44134.3	13.8882	15.1249	12614.8	12452.1	12142.2	45089.8	43687.8	43625.3	13.8942	13.9143	13.856	15.1313	15.123	15.1203
A_52_P5652	2.3597e-07	2.32455e-06	2.58558	up	NM_019748	chr7:16953902-16952241	Sae1	Mus musculus SUMO1 activating enzyme subunit 1 (Sae1), transcript variant 1, mRNA [NM_019748]	GO:0043008|GO:0046982|GO:0016925|GO:0016874|GO:0005634|GO:0008641|GO:0008022|GO:0003824|GO:0019948|GO:0006464|GO:0043231	NM_019748	Mm.258530	56459	159.495	781.083	7.21172	8.58221	159.54	159.727	159.219	782.954	766.358	793.938	7.19277	7.23063	7.21175	8.6043	8.55132	8.591
A_52_P657123	2.36346e-07	2.32539e-06	2.92177	up	XM_003945586	chr18:14650668-14650727	LOC101056031	PREDICTED: Mus musculus non-histone chromosomal protein HMG-17-like (LOC101056031), mRNA [XM_003945586]		XM_003945586		101056031	327.421	1849.21	8.32934	9.87618	334.142	318.153	329.967	1786.7	1870.89	1890.04	8.34014	8.30213	8.34575	9.84228	9.89255	9.89371
A_52_P5213	2.38417e-07	2.33364e-06	2.23057	up	NM_026539	chr3:97370747-97370688	Chd1l	Mus musculus chromodomain helicase DNA binding protein 1-like (Chd1l), mRNA [NM_026539]	GO:0005886|GO:0006200|GO:0004386|GO:0005634|GO:0003676|GO:0003677|GO:0005524|GO:0006974|GO:0005737|GO:0006281|GO:0000166|GO:0016787|GO:0006338|GO:0016887	NM_026539	Mm.41447	68058	547.544	2442.37	9.14409	10.3015	557.208	532.273	553.151	2383.42	2463.92	2479.78	9.15175	9.1202	9.16034	10.2801	10.3157	10.3087
A_52_P327467	2.39272e-07	2.3393e-06	2.73744	up	NM_025426	chr11:46254623-46254682	Med7	Mus musculus mediator complex subunit 7 (Med7), transcript variant 1, mRNA [NM_025426]	GO:0005667|GO:0006355|GO:0001104|GO:0006357|GO:0019827|GO:0016592|GO:0005634|GO:0006351	NM_025426	Mm.24159	66213	1071.86	5798.58	10.2032	11.6561	1098.69	1072.31	1044.58	5768.77	5795.65	5831.3	10.2144	10.2303	10.1651	11.6683	11.6498	11.6502
A_55_P2048348	2.39358e-07	2.3393e-06	3.04713	up	NM_025446	chr10:13373452-13373393	Aig1	Mus musculus androgen-induced 1 (Aig1), mRNA [NM_025446]	GO:0008150|GO:0003674|GO:0016020|GO:0016021|GO:0005575	NM_025446	Mm.45755	66253	156.542	898.186	7.18668	8.79413	161.957	156.687	150.981	887.885	897.739	908.933	7.2152	7.2029	7.14194	8.7948	8.79063	8.79697
A_51_P373696	2.40182e-07	2.345e-06	3.82761	up	NM_001013813	chr9:13511227-13511286	Maml2	Mus musculus mastermind like 2 (Drosophila) (Maml2), transcript variant 1, mRNA [NM_001013813]	GO:0005794|GO:0007219|GO:0045944|GO:0003713|GO:0005634	NM_001013813	Mm.116898	270118	200.195	1437.39	7.57383	9.51027	207.75	194.875	197.959	1387.38	1455	1469.77	7.60983	7.55606	7.55559	9.46898	9.53192	9.52991
A_52_P247492	2.40275e-07	2.345e-06	2.2494	up	AK144491	chr5:144091236-144091295	0610040B10Rik	Mus musculus 11 days embryo spinal cord cDNA, RIKEN full-length enriched library, clone:G630078L21 product:hypothetical protein, full insert sequence. [AK144491]			Mm.30983	67672	147.455	626.133	7.09567	8.26521	148.559	144.668	149.139	611.227	633.159	634.013	7.08456	7.07854	7.12391	8.24952	8.27852	8.26759
A_51_P399614	2.40628e-07	2.34735e-06	2.21312	up	NM_023322	chr5:145956092-145956033	Zkscan14	Mus musculus zinc finger with KRAB and SCAN domains 14 (Zkscan14), mRNA [NM_023322]	GO:0005622|GO:0006355|GO:0003700|GO:0005634|GO:0003676|GO:0003677|GO:0046872|GO:0006351	NM_023322	Mm.432480	67235	600.207	2647.75	9.28069	10.4268	620.938	580.99	598.693	2643.29	2637.46	2662.5	9.30722	9.25998	9.27486	10.4433	10.4176	10.4193
A_51_P452629	2.40767e-07	2.34737e-06	2.22441	up	NM_011905	chr3:83640403-83640344	Tlr2	Mus musculus toll-like receptor 2 (Tlr2), mRNA [NM_011905]	GO:0005515|GO:0032755|GO:0034123|GO:0050830|GO:0042995|GO:0006691|GO:0032757|GO:0042497|GO:0002752|GO:0042498|GO:0002755|GO:0042495|GO:0042496|GO:0044130|GO:0032728|GO:0046982|GO:0009986|GO:0032760|GO:0034134|GO:0042834|GO:0042535|GO:0032722|GO:0002224|GO:0045087|GO:0050707|GO:0009897|GO:0008329|GO:0004888|GO:0042346|GO:0008285|GO:0005886|GO:0032733|GO:0002237|GO:0030177|GO:0002238|GO:0032735|GO:…	NM_011905	Mm.87596	24088	703.409	3107.22	9.53128	10.6847	717.007	700.052	693.167	3091.98	3098.02	3131.65	9.53969	9.55331	9.50085	10.6935	10.6791	10.6815
A_55_P2185950	2.41232e-07	2.34795e-06	2.11691	up	NM_011794	chr1:187180797-187180856	Bpnt1	Mus musculus bisphosphate 3'-nucleotidase 1 (Bpnt1), mRNA [NM_011794]	GO:0046854|GO:0008441|GO:0000287|GO:0016787|GO:0016311|GO:0005575|GO:0046872|GO:0004441	NM_011794	Mm.227549	23827	121.995	480.785	6.79487	7.87683	124.668	121.697	119.619	467.826	481.625	492.904	6.8116	6.79065	6.78236	7.85675	7.87364	7.9001
A_51_P118132	2.41286e-07	2.34795e-06	2.33615	up	NM_011386	chr3:31021203-31021262	Skil	Mus musculus SKI-like (Skil), transcript variant 1, mRNA [NM_011386]	GO:0005515|GO:0070306|GO:0001669|GO:0003714|GO:0019904|GO:0001825|GO:0046332|GO:0005634|GO:0000122|GO:0070848|GO:0032403|GO:0070208|GO:0070207|GO:0005737|GO:0000166|GO:0007519|GO:0016605|GO:0003682|GO:0007050|GO:0007179|GO:0050772|GO:0045596|GO:0030512|GO:0002260	NM_011386	Mm.15406	20482	1082.52	5077.77	10.2251	11.4492	1088.98	1088.64	1069.92	5036.77	5065.12	5131.44	10.2041	10.2591	10.212	11.4501	11.4448	11.4528
A_55_P1989885	2.43452e-07	2.35721e-06	2.24942	up	NM_020618	chr11:99071406-99071347	Smarce1	Mus musculus SWI/SNF related, matrix associated, actin dependent regulator of chromatin, subfamily e, member 1 (Smarce1), mRNA [NM_020618]	GO:0005515|GO:0016922|GO:0071565|GO:0008080|GO:0003723|GO:0005634|GO:0006337|GO:0071564|GO:0003677|GO:0007399|GO:0047485|GO:0016514|GO:0017053|GO:0006338|GO:0045892|GO:0016568	NM_020618	Mm.379086	57376	2334.48	10327.5	11.4144	12.5839	2362.54	2345.07	2295.82	10142.3	10407.3	10432.8	11.4077	11.4433	11.3921	12.5713	12.5947	12.5857
A_55_P2174371	2.45493e-07	2.3674e-06	4.24301	up	AK051763	chr7:144574815-144574756	9430038I01Rik	RIKEN cDNA 9430038I01 gene [Source:MGI Symbol;Acc:MGI:1924502] [ENSMUST00000135335]	GO:0008150|GO:0003674|GO:0005575		Mm.29184	77252	50.6707	346.381	5.33691	7.42199	52.6669	50.3946	48.9508	340.967	345.098	353.079	5.39298	5.31812	5.29962	7.4194	7.40945	7.43713
A_51_P123134	2.46689e-07	2.37671e-06	2.27554	up	NM_146235	chrX:99338680-99338621	Ercc6l	Mus musculus excision repair cross-complementing rodent repair deficiency complementation group 6 like (Ercc6l), mRNA [NM_146235]	GO:0005694|GO:0004386|GO:0005575|GO:0003676|GO:0003677|GO:0005524|GO:0008150|GO:0007049|GO:0007067|GO:0000166|GO:0016787|GO:0000776|GO:0000775|GO:0051301	NM_146235	Mm.31911	236930	37.7453	126.685	4.86242	6.04863	38.7419	37.6957	36.7983	125.398	126.921	127.735	4.89489	4.8424	4.84998	6.05408	6.05133	6.04048
A_55_P2086075	2.47093e-07	2.37734e-06	4.48758	up	NM_009459	chr6:30165018-30164959	Ube2h	Mus musculus ubiquitin-conjugating enzyme E2H (Ube2h), transcript variant 1, mRNA [NM_009459]	GO:0004842|GO:0070979|GO:0016881|GO:0000166|GO:0016874|GO:0070936|GO:0005524	NM_009459	Mm.332967	22214	76.3125	594.847	6.01998	8.18592	77.0506	78.4769	73.41	586.554	597.129	600.859	6.01595	6.07514	5.96885	8.18248	8.19116	8.18412
A_52_P139740	2.47808e-07	2.38204e-06	2.40324	up	NM_023397	chr14:56277384-56277325	Mdp1	Mus musculus magnesium-dependent phosphatase 1 (Mdp1), transcript variant 1, mRNA [NM_023397]	GO:0016791|GO:0016787|GO:0030389|GO:0016311|GO:0004721|GO:0005575|GO:0046872|GO:0004725	NM_023397	Mm.24601	67881	324.389	1499.95	8.31332	9.5783	329.726	324.754	318.687	1504.67	1489.38	1505.79	8.31682	8.33655	8.2866	9.5997	9.56727	9.56794
A_51_P161691	2.50921e-07	2.39882e-06	3.52304	up	NM_009940	chr7:125668739-125668680	Coq7	Mus musculus demethyl-Q 7 (Coq7), mRNA [NM_009940]	GO:0005743|GO:0005634|GO:0001701|GO:0008340|GO:0046872|GO:0001841|GO:0005739|GO:0022904|GO:0006744|GO:0070584|GO:0016020|GO:0042775|GO:0034599|GO:0006979|GO:0001306|GO:0055114|GO:0022008	NM_009940	Mm.20634	12850	246.222	1625.53	7.88262	9.69944	247.75	243.885	247.029	1661.62	1614.97	1600	7.86397	7.88945	7.89443	9.74462	9.69196	9.66174
A_51_P255387	2.52267e-07	2.40471e-06	2.49975	up	NM_026068	chr11:72025374-72025315	Med31	Mus musculus mediator of RNA polymerase II transcription, subunit 31 homolog (yeast) (Med31), mRNA [NM_026068]	GO:0005515|GO:0006355|GO:0006461|GO:0001104|GO:0016592|GO:0048147|GO:0060173|GO:0005634|GO:0032403|GO:0006351	NM_026068	Mm.159496	67279	697.58	3438.3	9.51758	10.8394	718.813	684.672	689.255	3350.61	3468.21	3496.09	9.54317	9.51784	9.49172	10.8159	10.85	10.8522
A_55_P2132711	2.52303e-07	2.40471e-06	2.51008	up	NM_027854	chr5:130716268-130716327	Tmem248	Mus musculus transmembrane protein 248 (Tmem248), transcript variant 1, mRNA [NM_027854]	GO:0008150|GO:0003674|GO:0016020|GO:0016021|GO:0005575	NM_027854	Mm.258508	71667	806.006	3979.32	9.75421	11.0819	820.701	803.513	793.804	4009.91	3933.51	3994.54	9.75839	9.77016	9.73408	11.1121	11.0588	11.0749
A_52_P86693	2.54762e-07	2.42122e-06	2.04652	up	NM_026790	chr12:104678353-104678412	Ifi27	Mus musculus interferon, alpha-inducible protein 27 (Ifi27), transcript variant 1, mRNA [NM_026790]	GO:0005739|GO:0003674|GO:0006919|GO:0097190	NM_026790	Mm.2121	52668	10071.8	33929.2	13.5677	14.6009	10173.5	9927.01	10115	34686.9	33454.6	33646.1	13.5532	13.5702	13.5797	14.626	14.5905	14.5861
A_55_P2472435	2.55633e-07	2.42697e-06	2.23915	up	NM_018734	chr3:142236032-142236091	Gbp3	Mus musculus guanylate binding protein 3 (Gbp3), mRNA [NM_018734]	GO:0035458|GO:0050830|GO:0020005|GO:0003924|GO:0042832|GO:0005634|GO:0031410|GO:0051856|GO:0005525|GO:0005829|GO:0006184|GO:0005737|GO:0071346|GO:0000166	NM_018734	Mm.439718	55932	4853.25	20069.7	12.4793	13.6423	5005.13	4740.32	4814.29	19809.8	20086	20313.4	12.5029	12.4664	12.4687	13.6194	13.6484	13.659
A_55_P2007566	2.5602e-07	2.42697e-06	5.00453	up	NR_027952	chr17:71947336-71947277	Trmt61b	Mus musculus tRNA methyltransferase 61B (Trmt61b), transcript variant 2, long non-coding RNA [NR_027952]	GO:0008150|GO:0003674|GO:0005575	NR_027952	Mm.75202	68789	49.7865	402.667	5.30704	7.63028	51.9854	49.5373	47.8368	398.145	401.7	408.158	5.37217	5.28615	5.26282	7.62903	7.6255	7.63631
A_55_P2059775	2.56336e-07	2.42697e-06	4.16565	up									41.004	264.371	4.99186	7.0504	42.8023	40.5328	39.677	263.067	264.592	265.454	5.04929	4.95804	4.96825	7.06163	7.05071	7.03885
A_55_P2098335	2.56603e-07	2.42697e-06	2.48805	up	NM_009157	chr11:65502945-65502886	Map2k4	Mus musculus mitogen-activated protein kinase kinase 4 (Map2k4), mRNA [NM_009157]	GO:0005515|GO:0030424|GO:0032839|GO:0005634|GO:0005829|GO:0005622|GO:0005737|GO:0043525|GO:0000166|GO:0000165|GO:0016301|GO:0043204|GO:0004708|GO:0016772|GO:0043065|GO:0045740|GO:0006950|GO:0007254|GO:0006915|GO:0031435|GO:0007257|GO:0005524|GO:0016310|GO:0004672|GO:0008545|GO:0004674|GO:0001934|GO:0006468|GO:0004713|GO:0016740	NM_009157	Mm.412922	26398	104.458	471.42	6.53366	7.84868	105.776	102.032	105.566	473.69	465.878	474.691	6.52443	6.51475	6.5618	7.87171	7.82952	7.8448
A_55_P2048164	2.56857e-07	2.42697e-06	2.88533	up	NM_001145924	chr4:48574310-48574369	Msantd3	Mus musculus Myb/SANT-like DNA-binding domain containing 3 (Msantd3), transcript variant 1, mRNA [NM_001145924]	GO:0008150|GO:0005575|GO:0042802	NM_001145924	Mm.140749	66665	84.0327	426.676	6.18574	7.71447	87.5769	82.2149	82.3063	417.091	430.069	432.867	6.22785	6.15926	6.1701	7.70354	7.71835	7.72153
A_52_P116253	2.5756e-07	2.42697e-06	3.05773	up	NM_001025093	chr2:73684349-73684290	Atf2	Mus musculus activating transcription factor 2 (Atf2), transcript variant 1, mRNA [NM_001025093]	GO:0005515|GO:0003700|GO:0006366|GO:0035497|GO:0031573|GO:0032915|GO:0005634|GO:0005741|GO:0046872|GO:0005739|GO:0051091|GO:0005737|GO:0008140|GO:0045944|GO:0045444|GO:0004402|GO:0001102|GO:0006355|GO:0046982|GO:0016573|GO:0019901|GO:0035861|GO:0006970|GO:0003676|GO:0003677|GO:0003151|GO:0006351|GO:0006974|GO:0043565|GO:0001077|GO:0016020|GO:0003682|GO:0000980|GO:0060612|GO:0016740	NM_001025093	Mm.209903	11909	87.4441	474.391	6.24627	7.85873	90.1088	84.4513	87.7721	474.484	473.096	475.594	6.27361	6.20412	6.26108	7.87664	7.85194	7.8476
A_55_P2139886	2.58185e-07	2.43111e-06	3.20501	up	NM_134114	chr17:8520196-8520255	Sft2d1	Mus musculus SFT2 domain containing 1 (Sft2d1), mRNA [NM_134114]	GO:0008150|GO:0003674|GO:0005575	NM_134114	Mm.311080	106489	46.0968	229.667	5.18128	6.86161	45.8948	47.7231	44.6724	229.509	228.645	230.847	5.15966	5.22527	5.1589	6.88171	6.85355	6.84958
A_55_P2058297	2.59155e-07	2.43437e-06	14.8972	up	NM_001285852	chr4:102643550-102643609	Sgip1	Mus musculus SH3-domain GRB2-like (endophilin) interacting protein 1 (Sgip1), transcript variant 1, mRNA [NM_001285852]	GO:0005515|GO:0008017|GO:0030131|GO:0017124|GO:0005886|GO:0030122|GO:0030136|GO:0002021|GO:0006886|GO:0006897|GO:2000253|GO:0005737|GO:0005905|GO:0005543|GO:0015631|GO:0016020|GO:0048260|GO:2000507|GO:0016192	NM_001285852	Mm.238094	73094	5.44665	160.656	2.47238	6.36936	5.38537	5	5.95457	158.329	159.212	164.426	2.47275	2.37576	2.56864	6.37028	6.3557	6.38209
A_55_P1965539	2.6166e-07	2.44958e-06	2.01969	up	NM_026610	chr16:37647770-37647711	Ndufb4	Mus musculus NADH dehydrogenase (ubiquinone) 1 beta subcomplex 4 (Ndufb4), mRNA [NM_026610]	GO:0005739|GO:0003674|GO:0005747|GO:0005743|GO:0006979	NM_026610	Mm.379154	68194	10621.3	35349.1	13.6615	14.6756	10811.1	10567	10486	35673.8	35490.4	34883	13.6557	13.6836	13.645	14.6742	14.692	14.6606
A_55_P2010396	2.62206e-07	2.45099e-06	6.67892	up	NM_011056	chr13:110741493-110741552	Pde4d	Mus musculus phosphodiesterase 4D, cAMP specific (Pde4d), mRNA [NM_011056]	GO:0005515|GO:0003824|GO:0050900|GO:0046872|GO:0006939|GO:0005737|GO:0035264|GO:0010880|GO:0033137|GO:0060314|GO:0051117|GO:0005856|GO:0045822|GO:0086004|GO:0006198|GO:0008081|GO:0004114|GO:0007568|GO:0030593|GO:0034704|GO:0005891|GO:0044325|GO:0007165|GO:0071222|GO:0071872|GO:0002027|GO:0016020|GO:0016787	NM_011056	Mm.434429	238871	146.146	1780.26	7.08038	9.81999	141.194	150.473	146.771	1736.74	1797.72	1806.32	7.00861	7.14121	7.09131	9.80291	9.83093	9.82614
A_51_P270286	2.62383e-07	2.4515e-06	2.4833	up	NM_146229	chr9:114632464-114632523	Dync1li1	Mus musculus dynein cytoplasmic 1 light intermediate chain 1 (Dync1li1), mRNA [NM_146229]	GO:0005813|GO:0005886|GO:0005694|GO:0005874|GO:0090267|GO:0046605|GO:0003777|GO:0005524|GO:0007067|GO:0007049|GO:0000922|GO:0003774|GO:0005737|GO:0030286|GO:0000166|GO:0006810|GO:0000776|GO:0005868|GO:0005856|GO:0000775|GO:0051301|GO:0007018	NM_146229	Mm.128627	235661	674.661	3300.24	9.46276	10.775	671.527	671.33	681.127	3248.01	3311.42	3341.28	9.42603	9.48217	9.48008	10.7655	10.78	10.7796
A_66_P100105	2.62896e-07	2.4515e-06	2.73439	up	NM_172696	chr4:98384621-98384680	Inadl	Mus musculus InaD-like (Drosophila) (Inadl), transcript variant 1, mRNA [NM_172696]	GO:0005515|GO:0043234|GO:0048471|GO:0005737|GO:0030054|GO:0016020|GO:0005886|GO:0045177|GO:0005923	NM_172696	Mm.90218	12695	81.0932	387.081	6.12545	7.57667	83.2	81.6624	78.4172	383.212	384.979	393.052	6.14483	6.14642	6.08511	7.58306	7.56502	7.58194
A_55_P2098971	2.63077e-07	2.4515e-06	2.57896	up	NM_001085518	chr2:122350869-122350928	Gm14085	Mus musculus predicted gene 14085 (Gm14085), mRNA [NM_001085518]	GO:0008150|GO:0003674|GO:0005575	NM_001085518	Mm.482295	381417	453.162	2306.39	8.84778	10.2146	463.698	434.528	461.258	2288.49	2303.82	2326.86	8.85777	8.80998	8.87559	10.2201	10.212	10.2116
A_55_P1965194	2.63806e-07	2.4572e-06	2.48982	up	NM_178729	chr5:44149541-44149482	Fbxl5	Mus musculus F-box and leucine-rich repeat protein 5 (Fbxl5), transcript variant 2, mRNA [NM_178729]	GO:0048471|GO:0005737|GO:0016567|GO:0005506|GO:0031146|GO:0055072|GO:0046872|GO:0019005	NM_178729	Mm.25794	242960	695.59	3413.93	9.51151	10.8276	696.312	696.436	694.023	3356.48	3412.68	3472.63	9.48603	9.54594	9.50258	10.8182	10.8241	10.8404
A_55_P1971448	2.64855e-07	2.45749e-06	3.13056	up	NM_009226	chr18:10627858-10627917	Snrpd1	Mus musculus small nuclear ribonucleoprotein D1 (Snrpd1), mRNA [NM_009226]	GO:0008380|GO:0006397|GO:0005737|GO:0030529|GO:0005681|GO:0005634|GO:0071013|GO:0005689	NM_009226	Mm.603	20641	2877.84	16947.6	11.724	13.3704	2977.51	2752.54	2903.47	16810.9	16868.5	17163.5	11.7509	11.6773	11.7437	13.3643	13.3676	13.3793
A_52_P532227	2.65111e-07	2.45749e-06	2.63869	up	NM_007901	chr3:115414079-115414020	S1pr1	Mus musculus sphingosine-1-phosphate receptor 1 (S1pr1), mRNA [NM_007901]	GO:0008284|GO:0030335|GO:0046625|GO:0005886|GO:0004930|GO:0001525|GO:0048661|GO:0038036|GO:0007193|GO:0030155|GO:0050927|GO:0051497|GO:0007165|GO:0032320|GO:0007186|GO:0016020|GO:0007420|GO:0051482|GO:0045944|GO:0004871|GO:0016021|GO:0009897	NM_007901	Mm.982	13609	5916.41	27325.4	12.7591	14.1589	5998.42	5899.88	5850.93	27113.8	27303.9	27558.4	12.7516	12.7817	12.7441	14.1276	14.1645	14.1848
A_55_P1971137	2.65239e-07	2.45749e-06	4.22046	up		chr14:078861408-078861467							32.5234	204.836	4.62058	6.69798	33.1862	31.7301	32.6538	203.78	204.661	206.066	4.64053	4.56267	4.65854	6.70991	6.69661	6.68742
A_55_P2090279	2.65425e-07	2.45805e-06	3.29731	up		chr10:099761022-099760963							72.3635	409.542	5.93218	7.65347	73.1354	73.1677	70.7873	394.175	411.202	423.25	5.92879	5.95843	5.90933	7.6166	7.65642	7.6874
A_51_P123405	2.65799e-07	2.45943e-06	2.00441	up	NM_009772	chr2:127627047-127626988	Bub1	Mus musculus budding uninhibited by benzimidazoles 1 homolog (S. cerevisiae) (Bub1), transcript variant 2, mRNA [NM_009772]	GO:0005634|GO:0009790|GO:0007059|GO:0000166|GO:0016301|GO:0071173|GO:0071174|GO:0016772|GO:0000780|GO:0005694|GO:0051983|GO:0006915|GO:2001244|GO:0005524|GO:0016310|GO:0007049|GO:0007067|GO:0004672|GO:0004674|GO:0000777|GO:0000776|GO:0006468|GO:0000775|GO:0007063|GO:0016740|GO:0051301	NM_009772	Mm.2185	12235	43.9265	132.466	5.10067	6.10385	44.9825	43.8072	42.9897	129.74	133.25	134.409	5.12691	5.07703	5.09807	6.10044	6.10555	6.10555
A_55_P2021606	2.66035e-07	2.46053e-06	4.75803	up	L21701	chr14:54260816-54260875		T cell receptor alpha variable 14-2 [Source:MGI Symbol;Acc:MGI:3649206] [ENSMUST00000179267]			Mm.489062		105.008	897.6	6.5427	8.79306	106.709	101.076	107.239	866.383	908.16	918.258	6.54407	6.49537	6.58865	8.75618	8.80943	8.81358
A_55_P2062722	2.6667e-07	2.46532e-06	20.2889	up	BC030420	chr19:8215737-8215796		Mus musculus, clone IMAGE:5368497, mRNA. [BC030420]			Mm.449640		64.152	2099.73	5.72529	10.0679	68.7021	64.5462	59.2078	2094.29	2101.86	2103.06	5.82877	5.73463	5.61246	10.0816	10.0668	10.0553
A_51_P477019	2.66863e-07	2.46602e-06	2.24889	up	AK015947	chr17:8335348-8335289	Rnaset2a	Mus musculus adult male testis cDNA, RIKEN full-length enriched library, clone:4930532K22 product:hypothetical Ribonuclease Rh-like structure containing protein, full insert sequence. [AK015947]	GO:0090305|GO:0005788|GO:0004540|GO:0005764|GO:0005615		Mm.426736	100037283	79.3409	307.632	6.08727	7.25649	79.4499	80.4276	78.1452	303.112	306.288	313.496	6.06668	6.11808	6.07706	7.25513	7.24597	7.26837
A_55_P2126814	2.68305e-07	2.47325e-06	2.81428	up		chr1:012111494-012111553							1341.13	7380.11	10.5575	12.0503	1376.85	1284.45	1362.08	7313.24	7355.7	7471.4	10.5715	10.516	10.5851	12.0461	12.0446	12.0602
A_55_P2110136	2.6959e-07	2.47707e-06	7.64318	up	NM_172525	chr3:121717834-121717893	Arhgap29	Mus musculus Rho GTPase activating protein 29 (Arhgap29), mRNA [NM_172525]	GO:0035556|GO:0005622|GO:0005515|GO:0007165|GO:0046872|GO:0005096	NM_172525	Mm.229287	214137	17.1411	177.148	3.57016	6.50433	17.5745	18.0278	15.8209	179.913	176.592	174.939	3.61136	3.60307	3.49603	6.5428	6.50028	6.46991
A_51_P225179	2.7155e-07	2.48655e-06	2.08331	up	NM_172429	chr19:53454039-53453980	Smndc1	Mus musculus survival motor neuron domain containing 1 (Smndc1), mRNA [NM_172429]	GO:0008380|GO:0006397|GO:0008150|GO:0003674|GO:0005737|GO:0003723|GO:0006915|GO:0005681|GO:0005634|GO:0005575	NM_172429	Mm.313687	76479	3766.87	15225.1	12.1249	13.1837	3825.77	3768.78	3706.07	15027.5	15264.6	15383.2	12.1307	12.144	12.0999	13.1673	13.1914	13.1925
A_52_P525183	2.71568e-07	2.48655e-06	35.2255	up	NM_134188	chr12:85334071-85334130	Acot2	Mus musculus acyl-CoA thioesterase 2 (Acot2), mRNA [NM_134188]	GO:0047617|GO:0005739|GO:0006637|GO:0001666|GO:0000038|GO:0001676|GO:0016787|GO:0016290|GO:0005102|GO:0042760|GO:0016790	NM_134188		171210	11.8564	597.369	3.05462	8.19316	11.646	11.2264	12.6969	584.906	598.99	608.21	3.02143	2.94529	3.19713	8.1786	8.19563	8.20526
A_52_P217875	2.71869e-07	2.48686e-06	3.72718	up	NM_008211	chr11:115883529-115883470	H3f3b	Mus musculus H3 histone, family 3B (H3f3b), mRNA [NM_008211]	GO:0042692|GO:0090230|GO:0003674|GO:0006997|GO:0005634|GO:0001649	NM_008211	Mm.371563	15081	811.422	5829.24	9.76455	11.6626	824.013	777.13	833.123	5839.04	5788.33	5860.37	9.76692	9.71896	9.80777	11.683	11.6485	11.6564
A_55_P2041784	2.72098e-07	2.48686e-06	4.08697	up	NM_010303	chr11:109257528-109257587	Gna13	Mus musculus guanine nucleotide binding protein, alpha 13 (Gna13), mRNA [NM_010303]	GO:0005515|GO:0007264|GO:0008360|GO:0003924|GO:0031526|GO:0007266|GO:0031702|GO:0007204|GO:0046872|GO:0007243|GO:0030154|GO:0005622|GO:0000166|GO:0004871|GO:0031584|GO:0030334|GO:0001569|GO:0001664|GO:0005834|GO:0030168|GO:0001525|GO:0031683|GO:0005525|GO:0001701|GO:0031234|GO:0006184|GO:0007165|GO:0019001|GO:0007186|GO:0016020|GO:0031752|GO:0007189	NM_010303	Mm.193925	14674	105.382	780.1	6.54985	8.58089	106.371	101.539	108.237	764.282	784.003	792.015	6.53712	6.50697	6.60547	8.56992	8.58609	8.58665
A_55_P2040863	2.7219e-07	2.48686e-06	2.11836	up	NM_028044	chr3:121161024-121161083	Cnn3	Mus musculus calponin 3, acidic (Cnn3), mRNA [NM_028044]	GO:0008017|GO:0005515|GO:0005516|GO:0043197|GO:0043025|GO:0031032|GO:0014069|GO:0032780|GO:0003779|GO:0030425	NM_028044	Mm.275555	71994	1020.23	4313.76	10.1293	11.2122	1021.31	1012.91	1026.48	4225.93	4309.53	4405.83	10.1078	10.1424	10.1376	11.1932	11.2104	11.2331
A_66_P129730	2.72722e-07	2.48737e-06	3.21616	up	NM_007952	chr2:121263343-121263402	Pdia3	Mus musculus protein disulfide isomerase associated 3 (Pdia3), mRNA [NM_007952]	GO:0005515|GO:2001238|GO:0009986|GO:0005783|GO:0006662|GO:0015035|GO:0003756|GO:0045454|GO:0016853|GO:0005790	NM_007952	Mm.263177	14827	5394.22	29356.7	12.6229	14.3082	5402.35	5433.59	5346.72	29177.4	29371.9	29520.7	12.6002	12.6525	12.6159	14.27	14.3254	14.3292
A_51_P279437	2.73194e-07	2.48879e-06	3.56865	up	NM_029662	chr4:122624241-122624182	Mfsd2a	Mus musculus major facilitator superfamily domain containing 2A (Mfsd2a), mRNA [NM_029662]	GO:0016020|GO:0005886|GO:0005783|GO:0006810|GO:0016021	NM_029662	Mm.331842	76574	16.4151	76.1421	3.49951	5.33489	16.4191	16.681	16.1451	76.8248	74.3958	77.2057	3.49637	3.47436	3.5278	5.37134	5.29568	5.33764
A_55_P2092103	2.73232e-07	2.48879e-06	2.07522	up	XR_168498	chr12:117518924-117518865	Gm4132	PREDICTED: Mus musculus predicted gene 4132 (Gm4132), misc_RNA [XR_168498]		XR_168498	Mm.396976	100042963	231.072	925.86	7.78714	8.8404	238.122	227.495	227.601	913.643	920.573	943.365	7.8102	7.78622	7.76498	8.83587	8.82912	8.85621
A_55_P2332731	2.75134e-07	2.50151e-06	2.56492	up	XR_142072	chr4:32333392-32333450		RIKEN cDNA D130062J21 gene [Source:MGI Symbol;Acc:MGI:3642664] [ENSMUST00000165661]		XR_142072	Mm.483765		4828	22335.1	12.4708	13.8297	4776.25	4883.08	4824.68	22190.3	22318.9	22496	12.4388	12.5016	12.4719	13.8135	13.8399	13.8356
A_55_P1960281	2.75465e-07	2.50263e-06	3.4209	up	NM_025426	chr11:46254543-46254602	Med7	Mus musculus mediator complex subunit 7 (Med7), transcript variant 1, mRNA [NM_025426]	GO:0005667|GO:0006355|GO:0001104|GO:0006357|GO:0019827|GO:0016592|GO:0005634|GO:0006351	NM_025426	Mm.24159	66213	549.415	3612.44	9.14669	10.9211	554.595	528.661	564.99	3635.06	3588.35	3613.92	9.14285	9.10951	9.18772	10.9463	10.9112	10.9057
A_51_P111932	2.77749e-07	2.51903e-06	2.69384	up	NM_022329	chr1:157898874-157898933	Tor1aip2	Mus musculus torsin A interacting protein 2 (Tor1aip2), transcript variant 2, mRNA [NM_022329]	GO:0005515|GO:0008150|GO:0016020|GO:0005783|GO:0005634|GO:0016021	NM_022329	Mm.253335	240832	188.333	971.895	7.48255	8.91221	193.341	188.772	182.887	958.692	967.665	989.329	7.49984	7.50509	7.44272	8.91017	8.90226	8.9242
A_52_P471395	2.79965e-07	2.53366e-06	2.37721	up	NM_008338	chr16:91563982-91564041	Ifngr2	Mus musculus interferon gamma receptor 2 (Ifngr2), mRNA [NM_008338]	GO:0005886|GO:0005783	NM_008338	Mm.249364	15980	1303.8	6221.11	10.5165	11.7658	1322.69	1262.23	1326.49	6233.07	6232.56	6197.7	10.5149	10.4907	10.544	11.7827	11.7664	11.7481
A_66_P127255	2.8095e-07	2.54039e-06	3.12861	up	NM_023626	chr6:21923950-21924009	Ing3	Mus musculus inhibitor of growth family, member 3 (Ing3), mRNA [NM_023626]	GO:0006355|GO:0043065|GO:0005634|GO:0035064|GO:0046872|GO:0006351|GO:0032777|GO:0043967|GO:0043968|GO:0035267|GO:0008270|GO:0004402|GO:0040008|GO:0016568	NM_023626	Mm.39999	71777	552.633	3353.34	9.15477	10.8003	576.16	539.845	541.893	3258.04	3364.24	3437.74	9.19164	9.14035	9.13232	10.7713	10.8052	10.8244
A_51_P127334	2.81195e-07	2.54151e-06	2.14975	up	AK018620	chr19:12841041-12840982	Zfp91	Mus musculus adult male cecum cDNA, RIKEN full-length enriched library, clone:9130014I08 product:zinc finger protein 91 (MGI:104854,, full insert sequence. [AK018620]	GO:0070534|GO:0004842|GO:0007250|GO:0016874|GO:0005634|GO:0003676|GO:0046872|GO:0043231		Mm.485066	109910	36.7129	115.244	4.81869	5.92285	37.2398	36.4328	36.4662	114.331	115.053	116.347	4.83021	4.7882	4.83765	5.93264	5.91488	5.92103
A_52_P134639	2.82743e-07	2.54687e-06	3.00677	up	NM_009444	chr6:72561439-72561380	Tgoln2	Mus musculus trans-golgi network protein 2 (Tgoln2), mRNA [NM_009444]	GO:0005802|GO:0005794|GO:0016020|GO:0005886|GO:0016021|GO:0030140	NM_009444	Mm.246563	22135	384.902	2248.73	8.59035	10.1786	394.194	386.578	373.935	2231.74	2261.65	2252.8	8.60514	8.61996	8.54596	10.1844	10.1849	10.1664
A_55_P1991054	2.82756e-07	2.54687e-06	2.56884	up	NM_001081111	chr6:97105374-97105315	Tmf1	Mus musculus TATA element modulatory factor 1 (Tmf1), mRNA [NM_001081111]	GO:0005515|GO:0001675|GO:2000845|GO:0043066|GO:0006355|GO:0005794|GO:0005783|GO:0007289|GO:0005623|GO:0007286|GO:0005634|GO:0030317|GO:0001819|GO:0003677|GO:0006351|GO:0071407|GO:0005737|GO:0032275|GO:0016020|GO:0061136|GO:0010629|GO:0033327|GO:0042742|GO:0008584	NM_001081111	Mm.30893	232286	367.625	1850.62	8.51505	9.87616	382.613	357.65	362.611	1823.1	1868.63	1860.12	8.55247	8.49613	8.49653	9.87132	9.89038	9.86679
A_55_P2023191	2.84349e-07	2.55683e-06	5.83942	up	NM_015810	chr11:106640333-106640274	Polg2	Mus musculus polymerase (DNA directed), gamma 2, accessory subunit (Polg2), transcript variant 1, mRNA [NM_015810]	GO:0042645|GO:0006260|GO:0005739|GO:0006261|GO:0006281|GO:0003887|GO:0016779|GO:0003677|GO:0016740|GO:0042802	NM_015810	Mm.859	50776	38.2962	348.667	4.88565	7.43147	40.0122	37.4576	37.4189	350.186	353.646	342.169	4.94532	4.83251	4.87911	7.454	7.44555	7.39487
A_51_P315795	2.85363e-07	2.56376e-06	2.42173	up	NM_009451	chr17:57220514-57220455	Tubb4a	Mus musculus tubulin, beta 4A class IVA (Tubb4a), mRNA [NM_009451]	GO:0051258|GO:0005886|GO:0005874|GO:0003924|GO:0042995|GO:0005525|GO:0006184|GO:0043234|GO:0005929|GO:0033269|GO:0005737|GO:0000166|GO:0043209|GO:0015630|GO:0030030|GO:0043025|GO:0005200|GO:0005856|GO:0007017	NM_009451	Mm.7420	22153	221.669	1034.8	7.72422	9.00025	229.612	215.467	219.928	1026.65	1026.04	1051.71	7.75788	7.70111	7.71367	9.00806	8.98489	9.0078
A_52_P333419	2.88453e-07	2.58178e-06	2.15309	up	NM_010901	chr8:108615965-108616024	Nfatc3	Mus musculus nuclear factor of activated T cells, cytoplasmic, calcineurin dependent 3 (Nfatc3), mRNA [NM_010901]	GO:0071285|GO:0005515|GO:0001569|GO:0006355|GO:0003700|GO:0005886|GO:0005730|GO:0005634|GO:0003677|GO:0006351|GO:0005829|GO:0007507|GO:0045333|GO:0005737|GO:0045944|GO:0003682|GO:0055001|GO:0045893|GO:0051145	NM_010901	Mm.383185	18021	263.597	1102.41	7.9889	9.09531	270.204	261.604	258.982	1094.15	1111.55	1101.51	8.00455	7.99944	7.96272	9.1023	9.10758	9.07606
A_55_P1966992	2.89448e-07	2.58829e-06	3.90828	up	NM_001162926	chr15:60652589-60652530	Fam84b	Mus musculus family with sequence similarity 84, member B (Fam84b), mRNA [NM_001162926]	GO:0008150|GO:0003674|GO:0005737|GO:0005886	NM_001162926	Mm.411968	399603	24.5632	136.311	4.17233	6.13886	23.9476	25.1078	24.6343	134.369	136.311	138.251	4.12307	4.17009	4.22383	6.13806	6.13653	6.14201
A_52_P630493	2.89869e-07	2.58986e-06	3.03321	up	NM_001037941	chr5:30077544-30078952	Dnajb6	Mus musculus DnaJ (Hsp40) homolog, subfamily B, member 6 (Dnajb6), transcript variant 2, mRNA [NM_001037941]	GO:0005515|GO:0048471|GO:0030018|GO:0034504|GO:0060710|GO:0045109|GO:0030036|GO:0060715|GO:0051087|GO:0005634|GO:0032781|GO:0003677|GO:0005737|GO:0061077|GO:0044183|GO:0006457|GO:0030198|GO:0031072|GO:0060717|GO:0043154|GO:0045892|GO:0001671	NM_001037941	Mm.290110	23950	932.279	5597.66	9.99807	11.5989	975.591	891.922	929.323	5540.17	5582.18	5670.64	10.0392	9.95748	9.99756	11.5982	11.5945	11.604
A_51_P208580	2.91041e-07	2.59718e-06	2.59421	up	NM_133831	chr7:16527136-16525571	Gltscr2	Mus musculus glioma tumor suppressor candidate region gene 2 (Gltscr2), mRNA [NM_133831]	GO:0008150|GO:0003674|GO:0005730|GO:0043231	NM_133831	Mm.277634	68077	556.906	2816.7	9.16503	10.5403	567.643	538.999	564.075	2823.59	2827.39	2799.11	9.17183	9.13811	9.18515	10.5635	10.5448	10.5126
A_55_P2065799	2.91059e-07	2.59718e-06	2.26487	up	NM_028108	chr16:44160712-44160771	Naa50	Mus musculus N(alpha)-acetyltransferase 50, NatE catalytic subunit (Naa50), mRNA [NM_028108]	GO:0005515|GO:0005737|GO:0016746|GO:0008080|GO:0016740|GO:0006474	NM_028108	Mm.278726	72117	826.453	3736.42	9.79257	10.972	828.724	821.587	829.049	3663.53	3808.73	3736.99	9.77457	9.80685	9.79628	10.9551	11.0013	10.9596
A_55_P1956647	2.91638e-07	2.59998e-06	2.09622	up	NM_177386	chr2:10516716-10516775	Sfmbt2	Mus musculus Scm-like with four mbt domains 2 (Sfmbt2), transcript variant 1, mRNA [NM_177386]	GO:0042393|GO:0006355|GO:0010629|GO:0005634	NM_177386	Mm.329991	353282	170.765	683.401	7.32344	8.39123	170.892	171.664	169.74	669.123	684.844	696.237	7.30123	7.35175	7.31733	8.38392	8.3879	8.40186
A_55_P2163018	2.92818e-07	2.60627e-06	2.01631	up		chr2:058190885-058190944							1528.65	6233.41	10.7582	11.7699	1538.79	1529.03	1518.12	6104.97	6252.45	6342.8	10.7452	10.7796	10.7499	11.7496	11.7755	11.7848
A_52_P229959	2.93069e-07	2.60627e-06	2.89322	up	NM_019942	chrX:34452471-34452412	Sept6	Mus musculus septin 6 (Sept6), transcript variant 2, mRNA [NM_019942]	GO:0031105|GO:0007049|GO:0005737|GO:0000166|GO:0005694|GO:0000776|GO:0043679|GO:0005856|GO:0005525|GO:0000775|GO:0051301|GO:0008021	NM_019942	Mm.260036	56526	598.614	3370.98	9.27664	10.8093	617.403	572.303	606.136	3336.87	3402.35	3373.73	9.30147	9.23363	9.29482	10.811	10.8211	10.7959
A_51_P187842	2.93549e-07	2.60943e-06	2.32097	up	NM_025829	chr6:99575552-99575493	Eif4e3	Mus musculus eukaryotic translation initiation factor 4E member 3 (Eif4e3), mRNA [NM_025829]	GO:0008150|GO:0003674|GO:0005737|GO:0003723|GO:0003743|GO:0005575|GO:0006412|GO:0006417|GO:0006413	NM_025829	Mm.32889	66892	444.493	2046.57	8.81596	10.0307	458.585	427.703	447.191	2035.46	2028.2	2076.03	8.841	8.78355	8.82333	10.0375	10.0184	10.0362
A_66_P109731	2.94719e-07	2.61689e-06	2.46551	up	AY731702	chr6:67892296-67892237		Mus musculus clone 17 immunoglobulin kappa light chain mRNA, partial cds. [AY731702]			Mm.429458		192.845	913.246	7.51722	8.81911	198	191.962	188.573	919.168	905.807	914.761	7.53363	7.52867	7.48936	8.84592	8.80503	8.80638
A_51_P222092	2.99446e-07	2.6462e-06	2.28768	up	NM_008784	chrX:97698441-97698500	Igbp1	Mus musculus immunoglobulin (CD79A) binding protein 1 (Igbp1), mRNA [NM_008784]	GO:0005515|GO:0035306|GO:2001234|GO:0008601|GO:0035308|GO:0031434|GO:0000122|GO:0009966|GO:0032873|GO:0042113|GO:0060632|GO:0005737|GO:0045944|GO:0034612|GO:0043154|GO:0070555	NM_008784	Mm.7454	18518	608.11	2743.44	9.30079	10.4947	626.338	587.205	610.788	2715.55	2776.87	2737.92	9.32229	9.27445	9.30562	10.4961	10.5131	10.4749
A_55_P1989865	3.00069e-07	2.6473e-06	6.61039	up	NM_146153	chr4:125855498-125855439	Thrap3	Mus musculus thyroid hormone receptor associated protein 3 (Thrap3), mRNA [NM_146153]	GO:0051219|GO:0008380|GO:0048026|GO:0006367|GO:0006366|GO:0005634|GO:0043231|GO:0046966|GO:0000166|GO:0030518|GO:0000381|GO:0045944|GO:0004872|GO:0048255|GO:0035145|GO:0003712|GO:0006397|GO:0006355|GO:0001104|GO:0003713|GO:0000956|GO:0005524|GO:0006351|GO:0016592|GO:0045893|GO:0030521	NM_146153	Mm.236211	230753	30.2841	301.221	4.50291	7.22765	31.7777	29.7683	29.3061	289.522	303.534	310.607	4.57109	4.4493	4.48834	7.19027	7.238	7.25466
A_52_P634822	3.01166e-07	2.65248e-06	2.88239	up	NM_008672	chr7:150715332-150713167	Nap1l4	Mus musculus nucleosome assembly protein 1-like 4 (Nap1l4), transcript variant 2, mRNA [NM_008672]	GO:0008150|GO:0003674|GO:0006334|GO:0005634|GO:0005575	NM_008672	Mm.294625	17955	195.046	1077.08	7.53468	9.06195	192.355	195.248	197.534	1075.22	1075.4	1080.61	7.49175	7.55881	7.55347	9.07713	9.05697	9.05173
A_51_P257156	3.01861e-07	2.65527e-06	2.34876	up	NM_029832	chr2:130487890-130487831	Ddrgk1	Mus musculus DDRGK domain containing 1 (Ddrgk1), mRNA [NM_029832]	GO:0008150|GO:0003674|GO:0005783	NM_029832	Mm.440063	77006	518.317	2426.96	9.05853	10.2904	523.365	518.992	512.595	2362.52	2453.34	2465.03	9.04758	9.08671	9.04129	10.2675	10.3066	10.2972
A_55_P1963491	3.02225e-07	2.65735e-06	2.89647	up	NM_008972	chr1:88425798-88426068	Ptma	Mus musculus prothymosin alpha (Ptma), mRNA [NM_008972]	GO:0042393|GO:0043486|GO:0005634	NM_008972	Mm.19187	19231	5422.96	27426.5	12.6332	14.1674	5426.6	5274.95	5567.33	27692.1	27317.7	27269.8	12.6113	12.6125	12.6756	14.1831	14.1665	14.1527
A_55_P2152566	3.03183e-07	2.66153e-06	2.30303	up	NM_175397	chr1:87473570-87473511	Sp110	Mus musculus Sp110 nuclear body protein (Sp110), transcript variant 1, mRNA [NM_175397]	GO:0009617|GO:0006355|GO:0043065|GO:0045087|GO:0005730|GO:0006915|GO:0005634|GO:0003677|GO:0006351	NM_175397	Mm.335802	109032	12983.8	45154.2	13.9651	15.1686	13240.3	12888.3	12822.7	45164	45250.1	45048.3	13.9669	13.9764	13.9519	15.1358	15.1892	15.1808
A_55_P2072115	3.04216e-07	2.66484e-06	5.09828	up	NR_030671	chr4:155578638-155578697	AW011738	Mus musculus expressed sequence AW011738 (AW011738), long non-coding RNA [NR_030671]		NR_030671	Mm.483291	100382	32.9912	253.989	4.6444	6.99441	31.8526	33.825	33.296	251.232	252.825	257.91	4.57579	4.66633	4.69107	6.99768	6.98629	6.99926
A_52_P271377	3.044e-07	2.66534e-06	2.25025	up	NM_133766	chr15:65693222-65693281	Efr3a	Mus musculus EFR3 homolog A (S. cerevisiae) (Efr3a), mRNA [NM_133766]	GO:0005622|GO:0016337|GO:0016020|GO:0005886|GO:0042803|GO:0001533	NM_133766	Mm.260647	76740	628.43	2795.91	9.35474	10.5248	646.542	609.013	629.733	2810.81	2764.4	2812.51	9.37028	9.33438	9.35955	10.5503	10.5022	10.522
A_55_P2012331	3.04662e-07	2.66653e-06	2.20151	up		chrX:149344004-149343945							5388.47	21434.2	12.6182	13.7567	5544.72	5209.4	5411.28	21551.8	21388.9	21361.8	12.6384	12.5886	12.6275	13.7671	13.762	13.7409
A_51_P246705	3.05521e-07	2.67094e-06	2.32634	up	NM_029278	chr5:34987391-34986699	Nop14	Mus musculus NOP14 nucleolar protein (Nop14), mRNA [NM_029278]	GO:0008150|GO:0003674|GO:0042254|GO:0006364|GO:0032040|GO:0005634|GO:0005575	NM_029278	Mm.40292	75416	327.62	1470.94	8.33115	9.54921	332.871	322.381	327.606	1488.44	1453.55	1470.83	8.33366	8.32477	8.33502	9.58525	9.53119	9.53119
A_55_P2227580	3.05675e-07	2.67094e-06	4.46538	up	AK038031	chr16:45984108-45984049	A130072N09Rik	Mus musculus 16 days neonate thymus cDNA, RIKEN full-length enriched library, clone:A130072N09 product:unclassifiable, full insert sequence. [AK038031]			Mm.446600	319271	753.403	6361.33	9.64467	11.8035	749.981	772.665	737.563	6307.1	6367.77	6409.12	9.60918	9.70945	9.61538	11.8041	11.8041	11.8023
A_55_P1986556	3.06932e-07	2.67859e-06	2.0102	up	NM_010799	chr19:32589734-32589793	Minpp1	Mus musculus multiple inositol polyphosphate histidine phosphatase 1 (Minpp1), mRNA [NM_010799]	GO:0034417|GO:0016791|GO:0052826|GO:0016787|GO:0016020|GO:0005886|GO:0005783|GO:0030351|GO:0016311|GO:0030352|GO:0004446|GO:0003993	NM_010799	Mm.255116	17330	2050.89	8184.98	11.2187	12.2261	2048.47	2066.04	2038.16	8095.8	8182.13	8277.01	11.1977	11.2464	11.2121	12.2171	12.2291	12.2321
A_66_P138585	3.09357e-07	2.69751e-06	9648.96	up	AK014727	chr18:76218793-76218734	4833419G08Rik	Mus musculus 0 day neonate head cDNA, RIKEN full-length enriched library, clone:4833419G08 product:unclassifiable, full insert sequence. [AK014727]	GO:0008150|GO:0003674|GO:0005575		Mm.159332	74842	17.1292	98693	3.57116	16.8073	15.7019	18.6753	17.0105	87999	95254.7	112825	3.43136	3.66134	3.62077	16.4935	16.7895	17.1389
A_52_P111866	3.11359e-07	2.70935e-06	3.66484	up	NM_028108	chr16:44157281-44158026	Naa50	Mus musculus N(alpha)-acetyltransferase 50, NatE catalytic subunit (Naa50), mRNA [NM_028108]	GO:0005515|GO:0005737|GO:0016746|GO:0008080|GO:0016740|GO:0006474	NM_028108	Mm.278726	72117	240.992	1649.9	7.84612	9.71987	253.349	229.305	240.321	1647.17	1660.31	1642.2	7.89207	7.80004	7.84624	9.732	9.72697	9.70063
A_55_P2039699	3.15084e-07	2.73412e-06	2.48704	up	NM_009921	chr9:109749970-109749911	Camp	Mus musculus cathelicidin antimicrobial peptide (Camp), mRNA [NM_009921]	GO:0051873|GO:0008284|GO:0050830|GO:0042581|GO:0005576|GO:0006952|GO:0042995|GO:0005615|GO:0045766|GO:0050829|GO:0005737|GO:0001934|GO:0044130|GO:0044140|GO:0042742	NM_009921	Mm.3834	12796	1889.61	9186.4	11.0891	12.4036	1942.4	1817.15	1909.29	9098.03	9198.83	9262.35	11.1064	11.0504	11.1106	12.3948	12.4066	12.4093
A_55_P2109049	3.20936e-07	2.76636e-06	5.37536	up	AF126458	chr14:53914576-53914635		Mus musculus clone MR2.5 T-cell receptor alpha chain mRNA, partial cds. [AF126458]			Mm.446617		127.427	1246.62	6.86039	9.28675	133.701	123.048	125.533	1253.99	1231.29	1254.58	6.92028	6.80652	6.85439	9.31803	9.26152	9.28071
A_55_P2026685	3.23746e-07	2.78362e-06	4.94658	up	AK043253	chr14:54397090-54397149		T cell receptor alpha variable 3-4 [Source:MGI Symbol;Acc:MGI:2684925] [ENSMUST00000103670]			Mm.308293		45.0052	352.436	5.14035	7.44678	45.5937	46.7056	42.7164	356.007	353.873	347.43	5.1461	5.1895	5.08545	7.47837	7.44617	7.41582
A_55_P2077901	3.24034e-07	2.78362e-06	2.21735	up	NM_013486	chr3:101079890-101079831	Cd2	Mus musculus CD2 antigen (Cd2), mRNA [NM_013486]	GO:0005515|GO:0030971|GO:0009986|GO:0019901|GO:0005576|GO:0043621|GO:0003823|GO:0042803|GO:0043234|GO:0042110|GO:0016337|GO:0001948|GO:0016020|GO:0009898|GO:0045121|GO:0004872|GO:0016021|GO:0007155|GO:0046658|GO:0009897	NM_013486	Mm.22842	12481	18298.7	57576.2	14.5265	15.6753	18520.3	17871.6	18504.1	58717.4	57339.5	56671.8	14.4998	14.5233	14.5564	15.6757	15.6856	15.6647
A_55_P2059130	3.24068e-07	2.78362e-06	2.69245	up	AK162116	chr11:96354215-96354274	Skap1	src family associated phosphoprotein 1 [Source:MGI Symbol;Acc:MGI:1925723] [ENSMUST00000149988]	GO:0050852|GO:0005737|GO:0019901|GO:0016020|GO:0005886|GO:0045944|GO:0019904|GO:0005634|GO:0045893|GO:0042169|GO:0032403|GO:0003823		Mm.395840	78473	195.544	1006.8	7.5363	8.96522	202.902	191.191	192.54	992.45	992.091	1035.86	7.57021	7.52214	7.51655	8.96419	8.9422	8.98926
A_55_P1985143	3.27561e-07	2.79824e-06	3.05182	up		chr18:090700729-090700788							1536	9011.5	10.7632	12.3729	1580.22	1461.64	1566.15	8874.67	9015.59	9144.23	10.78	10.7167	10.7929	12.3588	12.3775	12.3823
A_55_P2034420	3.28118e-07	2.80186e-06	3.40799	up	AA981787	chrX_random:1612700-1612641		ua36d08.r1 Soares_mammary_gland_NbMMG Mus musculus cDNA clone IMAGE:1348815 5' similar to gb:L21696_cds1 PROTHYMOSIN ALPHA (HUMAN); gb:X56135 Mouse mRNA for prothymosin alpha (MOUSE);. [AA981787]			Mm.366081		1350.75	8800.33	10.5672	12.3361	1355.97	1370.67	1325.61	8917.39	8715.06	8768.54	10.5472	10.6127	10.5417	12.3653	12.3225	12.3206
A_55_P1970464	3.30708e-07	2.82168e-06	2.05517	up	M54977	chr12:117202274-117202215		immunoglobulin heavy variable 1-83 [Source:MGI Symbol;Acc:MGI:3648939] [ENSMUST00000103550]			Mm.423777		371.946	1493.92	8.53427	9.57353	382.105	362.073	371.661	1455.59	1505.63	1520.53	8.54945	8.51783	8.53554	9.54745	9.58667	9.58648
A_55_P2106975	3.31268e-07	2.82532e-06	5.99447	up	NM_001243762	chrX:6736659-6736600	Clcn5	Mus musculus chloride channel 5 (Clcn5), transcript variant 2, mRNA [NM_001243762]	GO:0006821|GO:0005794|GO:0005886|GO:0005247|GO:0045177|GO:0005765|GO:0055085|GO:0005524|GO:0006897|GO:0044070|GO:0015297|GO:0016020|GO:0000166|GO:0030554|GO:0006810|GO:0034765|GO:0016021|GO:0005216|GO:0005768|GO:0006811	NM_001243762	Mm.486257	12728	16.2612	128.757	3.48575	6.06938	16.0896	17.5492	15.1447	125.232	128.602	132.435	3.46828	3.55881	3.43015	6.05295	6.06577	6.08942
A_55_P2107045	3.32167e-07	2.83183e-06	2.21876	up	NM_010858	chr11:104448441-104448500	Myl4	Mus musculus myosin, light polypeptide 4 (Myl4), mRNA [NM_010858]	GO:0003785|GO:0051015|GO:0002026|GO:0005509|GO:0032781|GO:0016459|GO:0060048|GO:0031672	NM_010858	Mm.390355	17896	609.856	2686.04	9.30474	10.4545	624.79	603.841	600.938	2631.65	2682.61	2743.87	9.31599	9.31803	9.28021	10.4349	10.4504	10.4782
A_52_P664617	3.34598e-07	2.84449e-06	2.02617	up	NM_153063	chr17:33115470-33115529	Zfp472	Mus musculus zinc finger protein 472 (Zfp472), mRNA [NM_153063]	GO:0008150|GO:0003674|GO:0005575|GO:0046872	NM_153063	Mm.328953	224691	775.083	3155.84	9.68848	10.7072	799.153	752.923	773.174	3154.06	3145.61	3167.84	9.71258	9.66517	9.68768	10.7224	10.7	10.6993
A_51_P515496	3.35111e-07	2.8454e-06	2.22485	up	NM_152824	chr2:11507487-11507323	Rbm17	Mus musculus RNA binding motif protein 17 (Rbm17), mRNA [NM_152824]	GO:0008380|GO:0006397|GO:0000166|GO:0003723|GO:0000375|GO:0005681|GO:0005634|GO:0003676	NM_152824	Mm.182769	76938	3298.64	14362.7	11.9238	13.0775	3320.52	3306.04	3269.35	14162.1	14456.8	14469.3	11.9097	11.9495	11.9122	13.055	13.097	13.0805
A_55_P2064478	3.35246e-07	2.8454e-06	5.74528	up	NM_001285988	chr11:104387425-104387366	Cdc27	Mus musculus cell division cycle 27 (Cdc27), transcript variant 1, mRNA [NM_001285988]	GO:0007049|GO:0005813|GO:0005737|GO:0070979|GO:0005680|GO:0019903|GO:0005876|GO:0005634|GO:0007091|GO:0051301	NM_001285988	Mm.89845	217232	38.7491	347.514	4.90459	7.42697	40.0288	39.8455	36.3732	350.722	346.21	345.61	4.9457	4.93477	4.83331	7.4566	7.41617	7.40813
A_52_P549927	3.37163e-07	2.85405e-06	2.18547	up	NM_027472	chr11:80177471-80177412	5730455P16Rik	Mus musculus RIKEN cDNA 5730455P16 gene (5730455P16Rik), mRNA [NM_027472]	GO:0008150|GO:0003674|GO:0005575	NM_027472	Mm.86860	70591	44.0737	145.919	5.10565	6.2336	44.9739	44.0688	43.1784	142.06	145.249	150.448	5.12651	5.08545	5.10499	6.22023	6.22157	6.25898
A_55_P2066613	3.40979e-07	2.87523e-06	2.3955	up	NM_008879	chr14:75629312-75629371	Lcp1	Mus musculus lymphocyte cytosolic protein 1 (Lcp1), transcript variant 2, mRNA [NM_008879]	GO:0005515|GO:0030054|GO:0005886|GO:0005884|GO:0005509|GO:0009611|GO:0001891|GO:0003779|GO:0042995|GO:0015629|GO:0001726|GO:0046872|GO:0042802|GO:0005829|GO:0005737|GO:0051015|GO:0016020|GO:0033157|GO:0005856|GO:0051017|GO:0002286	NM_008879	Mm.153911	18826	3959	17818.3	12.2019	13.4622	4052.94	3817.61	4006.47	17648.1	17733.1	18073.8	12.2171	12.1675	12.2211	13.4465	13.4622	13.478
A_51_P514675	3.41781e-07	2.87868e-06	2.15738	up	NM_026479	chr11:53146562-53146621	Zcchc10	Mus musculus zinc finger, CCHC domain containing 10 (Zcchc10), mRNA [NM_026479]	GO:0008150|GO:0003674|GO:0008270|GO:0005575|GO:0003676|GO:0046872	NM_026479	Mm.288072	67966	1194.1	5204.57	10.3736	11.4829	1204.94	1184.42	1192.92	5051.53	5231.69	5330.49	10.3616	10.3874	10.3717	11.4538	11.4884	11.5063
A_66_P133025	3.41905e-07	2.87868e-06	2.60566	up	NM_023232	chr5:123973352-123973293	Diablo	Mus musculus diablo homolog (Drosophila) (Diablo), mRNA [NM_023232]	GO:0035631|GO:0008635|GO:0006919|GO:0008631|GO:0006915|GO:0051402|GO:0097193|GO:0005829|GO:0005622|GO:0005739|GO:0005758|GO:0005737|GO:0009898	NM_023232	Mm.46716	66593	139.656	683.767	7.00906	8.39071	138.098	141.311	139.559	681.534	675.809	693.957	6.97575	7.03833	7.01309	8.40637	8.36899	8.39676
A_55_P2085170	3.43386e-07	2.88653e-06	2.39241	up	NM_001177324	chrX:34462895-34462836	Sept6	Mus musculus septin 6 (Sept6), transcript variant 1, mRNA [NM_001177324]	GO:0031105|GO:0007049|GO:0005737|GO:0000166|GO:0005694|GO:0000776|GO:0043679|GO:0005856|GO:0005525|GO:0000775|GO:0051301|GO:0008021	NM_001177324	Mm.260036	56526	404.526	1905.29	8.66501	9.92347	410.177	407.714	395.686	1881.41	1918.02	1916.43	8.66301	8.69896	8.63305	9.92256	9.93085	9.917
A_55_P2088735	3.44211e-07	2.8913e-06	3.91927	up	AK189299	chr16:56024706-56024647	Pcnp	PEST proteolytic signal containing nuclear protein [Source:MGI Symbol;Acc:MGI:1923552] [ENSMUST00000130818]	GO:0007049|GO:0016567|GO:0043161|GO:0005634		Mm.310642	76302	45.3647	279.217	5.15362	7.1242	46.8808	44.6978	44.5153	282.796	275.71	279.144	5.19673	5.10925	5.15488	7.15842	7.10654	7.10766
A_51_P393862	3.4607e-07	2.90077e-06	3.12649	up	NM_025716	chr10:127647169-127647110	Spryd4	Mus musculus SPRY domain containing 4 (Spryd4), mRNA [NM_025716]	GO:0005739|GO:0008150|GO:0003674|GO:0005634	NM_025716	Mm.29694	66701	282.679	1668.76	8.09081	9.73535	290.606	282.32	275.111	1691.43	1654.69	1660.15	8.11598	8.10448	8.05198	9.76749	9.72264	9.71593
A_55_P2106827	3.47267e-07	2.90753e-06	2.21777	up		chr16:036779071-036779130							4272.96	17752.7	12.3076	13.4567	4419.84	4115.51	4283.54	17951.2	17507.9	17799	12.3276	12.2827	12.3126	13.4802	13.4405	13.4495
A_55_P2181246	3.48012e-07	2.91261e-06	3.26824	up		chr16:017735059-017735118							140.114	859.306	7.0127	8.72122	137.203	141.098	142.04	848.056	852.321	877.543	6.96288	7.03587	7.03935	8.71714	8.70796	8.73855
A_51_P216605	3.48496e-07	2.9155e-06	4.59517	up	NM_177993	chr12:32614386-32614327	Hbp1	Mus musculus high mobility group box transcription factor 1 (Hbp1), transcript variant 2, mRNA [NM_177993]	GO:0005515|GO:0006355|GO:0003723|GO:0043268|GO:0005634|GO:0016055|GO:0003677|GO:0006351	NM_177993	Mm.390461	73389	424.933	3679.76	8.74888	10.949	417.611	431.588	425.6	3582.63	3690.6	3766.07	8.69262	8.80072	8.75329	10.9238	10.9521	10.9711
A_52_P445307	3.49938e-07	2.92176e-06	2.17894	up	NM_023153	chr9:14312398-14314687	Cwc15	Mus musculus CWC15 homolog (S. cerevisiae) (Cwc15), mRNA [NM_023153]	GO:0008380|GO:0006397|GO:0008150|GO:0003674|GO:0000398|GO:0005681|GO:0005634|GO:0071013	NM_023153	Mm.245938	66070	7022.58	27252.8	13.0308	14.1544	7148.14	6987.61	6932	27691.4	27054.8	27012.1	13.029	13.0496	13.0138	14.1817	14.1468	14.1348
A_55_P2042273	3.50559e-07	2.92346e-06	3.46163	up	NM_001081251	chr14:31840656-31840715	Pbrm1	Mus musculus polybromo 1 (Pbrm1), mRNA [NM_001081251]	GO:0005515|GO:0006355|GO:0008285|GO:0005634|GO:0001890|GO:0003677|GO:0006351|GO:0007507|GO:0060979|GO:0003007|GO:0060948|GO:0001974|GO:0003682|GO:0000776|GO:0045893|GO:0003349|GO:0016568	NM_001081251	Mm.27913	66923	87.1373	534.173	6.24127	8.03272	90.807	85.6123	84.9927	532.541	523.426	546.552	6.28537	6.22646	6.21198	8.04633	7.99985	8.05198
A_52_P436700	3.52345e-07	2.93253e-06	2.50215	up	NM_019821	chr5:115120158-115120099	Gltp	Mus musculus glycolipid transfer protein (Gltp), mRNA [NM_019821]	GO:0005737|GO:0051861|GO:0017089|GO:0006869|GO:0046836|GO:0006810|GO:0005575|GO:0008289	NM_019821	Mm.275766	56356	1008.14	5030.67	10.1132	11.4363	1009.88	1013.86	1000.68	5056.73	5056.9	4978.39	10.0935	10.1445	10.1014	11.4554	11.4425	11.4111
A_52_P587642	3.53741e-07	2.93951e-06	2.57484	up	NM_007916	chr8:113499448-113499389	Ddx19a	Mus musculus DEAD (Asp-Glu-Ala-Asp) box polypeptide 19a (Ddx19a), mRNA [NM_007916]	GO:0008026|GO:0043065|GO:0003723|GO:0004386|GO:0005634|GO:0003676|GO:0015031|GO:0005524|GO:0005737|GO:0000166|GO:0016020|GO:0016787|GO:0005643|GO:0006810|GO:0051028	NM_007916	Mm.287901	13680	152.535	741.959	7.14746	8.51194	154.487	153.681	149.436	727.51	731.927	766.44	7.14844	7.168	7.12594	8.50175	8.48811	8.54596
A_55_P2168124	3.54446e-07	2.94303e-06	2.4953	up		chr6:066661728-066661787							14589	51569.6	14.1365	15.4557	15132.4	14186.2	14448.3	53595.4	50525.7	50587.6	14.1542	14.1276	14.1276	15.4927	15.4351	15.4392
A_52_P339722	3.55144e-07	2.9465e-06	2.50527	up	NM_146087	chr18:61736169-61736228	Csnk1a1	Mus musculus casein kinase 1, alpha 1 (Csnk1a1), mRNA [NM_146087]	GO:0051219|GO:0005634|GO:0005737|GO:0001948|GO:0000166|GO:0016301|GO:0005856|GO:0016055|GO:0016772|GO:0042277|GO:0005813|GO:0000287|GO:0005694|GO:0005524|GO:0000902|GO:0016310|GO:0007049|GO:0007067|GO:0004672|GO:0016607|GO:0004674|GO:0030529|GO:0005847|GO:0000776|GO:0006468|GO:0000775|GO:0016740|GO:0051301	NM_146087	Mm.26908	93687	571.494	2798.15	9.20291	10.5279	588.864	556.04	569.578	2721.27	2847.72	2825.47	9.22465	9.18562	9.19844	10.4978	10.5573	10.5285
A_52_P493477	3.57052e-07	2.95786e-06	3.3616	up	NM_173051	chr13:32976102-32975867	Serpinb1c	Mus musculus serine (or cysteine) peptidase inhibitor, clade B, member 1c (Serpinb1c), mRNA [NM_173051]	GO:0030162|GO:0010951|GO:0005737|GO:0004867|GO:0010466|GO:0030414|GO:0005615	NM_173051	Mm.250802	380839	85.8784	510.371	6.21778	7.96693	89.3745	83.4195	84.8413	491.526	518.804	520.785	6.25849	6.18507	6.20979	7.93342	7.98553	7.98184
A_55_P1997153	3.60587e-07	2.97991e-06	2.70192	up	NM_013844	chr5:139053115-139053056	Zfp68	Mus musculus zinc finger protein 68 (Zfp68), transcript variant 1, mRNA [NM_013844]	GO:0008150|GO:0003674|GO:0005575|GO:0046872	NM_013844	Mm.27575	24135	84.5311	402.964	6.19541	7.6294	87.7861	82.8122	82.9951	402.856	405.81	400.226	6.23213	6.17284	6.18128	7.64507	7.6389	7.60423
A_51_P207591	3.63189e-07	2.99317e-06	2.7789	up	NM_013473	chr14:34913661-34913720	Anxa8	Mus musculus annexin A8 (Anxa8), transcript variant 1, mRNA [NM_013473]	GO:0007599|GO:0005544|GO:0007596|GO:0005509|GO:0005575|GO:0046872	NM_013473	Mm.3267	11752	38.3814	159.798	4.88849	6.363	38.9013	39.4882	36.7546	156.853	162.372	160.168	4.89957	4.91794	4.84795	6.35745	6.38209	6.34945
A_55_P2105963	3.63681e-07	2.99489e-06	2.35085	up	NM_172435	chrX:104300217-104300276	P2ry10	Mus musculus purinergic receptor P2Y, G-protein coupled 10 (P2ry10), mRNA [NM_172435]	GO:0007165|GO:0016020|GO:0007186|GO:0005886|GO:0045028|GO:0004930|GO:0016021|GO:0004871	NM_172435	Mm.74639	78826	7704.17	30758.1	13.177	14.4102	7704.58	7812.43	7595.49	31073.8	30457.3	30743.1	13.152	13.2134	13.1655	14.4163	14.3997	14.4146
A_66_P119964	3.64391e-07	2.99721e-06	2.93772	up	JX120264	chr12:117107172-117107113		Mus musculus strain C57BL/6 clone 79 immunoglobulin heavy chain mRNA, partial cds. [JX120264]			Mm.290645		36.6517	160.834	4.81574	6.37044	36.1782	36.7258	37.051	159.126	161.17	162.207	4.78093	4.80402	4.86227	6.37629	6.36994	6.36508
A_55_P2088401	3.65324e-07	3.00254e-06	3.04345	up	NM_010399	chr17:36177230-36177171	H2-T9	Mus musculus histocompatibility 2, T region locus 9 (H2-T9), mRNA [NM_010399]	GO:0002474|GO:0005886|GO:0042605|GO:0005102	NM_010399	Mm.195061	15051	2487.51	14590.5	11.5009	13.1066	2532.07	2410.97	2519.48	14860.4	14389.1	14521.9	11.5032	11.4734	11.5261	13.1468	13.0869	13.0861
A_55_P2069192	3.66528e-07	3.00691e-06	5.07811	up	AK012019	chr16:87367611-87367670	N6amt1	Mus musculus 10 days embryo whole body cDNA, RIKEN full-length enriched library, clone:2610312J19 product:PUTATIVE N6-DNA-METHYLTRANSFERASE (EC 2.1.1.-) (PROTEIN PRED28) (M.HSAHEMK2P) homolog [Homo sapiens], full insert sequence. [AK012019]	GO:0043234|GO:0030307|GO:0008168|GO:0006479|GO:0008276|GO:0032259|GO:0016740		Mm.296532	67768	77.5495	683.475	6.04739	8.39168	78.37	74.6893	79.5891	666.034	683.191	701.201	6.04447	5.989	6.10868	8.37414	8.3843	8.41659
A_51_P353008	3.67952e-07	3.01353e-06	2.48373	up	NM_010799	chr19:32589484-32589543	Minpp1	Mus musculus multiple inositol polyphosphate histidine phosphatase 1 (Minpp1), mRNA [NM_010799]	GO:0034417|GO:0016791|GO:0052826|GO:0016787|GO:0016020|GO:0005886|GO:0005783|GO:0030351|GO:0016311|GO:0030352|GO:0004446|GO:0003993	NM_010799	Mm.255116	17330	1082.02	5379.34	10.2215	11.534	1120.14	1046.84	1079.08	5243.07	5418.12	5476.83	10.2479	10.1939	10.2225	11.507	11.5452	11.5497
A_55_P2364315	3.68549e-07	3.01608e-06	2.01396	up	AK051948	chr11:104299137-104299078	D030002E05Rik	Mus musculus 12 days embryo eyeball cDNA, RIKEN full-length enriched library, clone:D230022F05 product:unclassifiable, full insert sequence. [AK051948]				319780	863.8	3528.46	9.87023	10.8803	887.024	850.66	853.717	3547.66	3510.7	3527.01	9.88906	9.86795	9.85368	10.9044	10.8705	10.8659
A_51_P105068	3.7007e-07	3.02147e-06	2.49712	up	NM_027990	chr2:49804191-49804250	Lypd6b	Mus musculus LY6/PLAUR domain containing 6B (Lypd6b), mRNA [NM_027990]	GO:0008150|GO:0003674|GO:0016020|GO:0005886|GO:0031225|GO:0005575	NM_027990	Mm.41381	71897	119.268	550.667	6.75401	8.07427	120.31	121.622	115.874	547.578	549.94	554.484	6.74988	6.79032	6.72182	8.08644	8.06641	8.06996
A_52_P9260	3.70516e-07	3.02159e-06	2.83488	up	NM_001024512	chr14:21197036-21197095	Fam149b	Mus musculus family with sequence similarity 149, member B (Fam149b), transcript variant 1, mRNA [NM_001024512]	GO:0008150|GO:0003674|GO:0005575	NM_001024512	Mm.206990	105428	75.2291	365.276	5.9945	7.49779	75.5812	75.3944	74.7116	371.699	359.708	364.422	5.98309	6.00399	5.99643	7.54326	7.47023	7.47987
A_55_P2179020	3.71448e-07	3.02802e-06	2.04118	up	NM_001177658	chr1:4764592-4764533	Mrpl15	Mus musculus mitochondrial ribosomal protein L15 (Mrpl15), transcript variant 1, mRNA [NM_001177658]	GO:0005739|GO:0003735|GO:0030529|GO:0015934|GO:0005840|GO:0006412|GO:0005762	NM_001177658	Mm.182927	27395	442.392	1804.38	8.80896	9.83836	442.447	439.568	445.16	1754.15	1830.97	1828	8.78565	8.82418	8.81704	9.81848	9.85697	9.83963
A_55_P2067842	3.72462e-07	3.03041e-06	2.28085	up	NM_001164336	chr19:37295173-37295232	March5	Mus musculus membrane-associated ring finger (C3HC4) 5 (March5), transcript variant 2, mRNA [NM_001164336]	GO:0000209|GO:0004842|GO:0005783|GO:0016874|GO:0090344|GO:0005741|GO:0090141|GO:0090140|GO:0046872|GO:0051865|GO:0005739|GO:0051020|GO:0016020|GO:0070585|GO:0005789|GO:0008270|GO:0016021	NM_001164336	Mm.175989	69104	982.352	4457.6	10.0746	11.2642	1014.4	951.747	980.909	4360.83	4466.07	4545.89	10.0998	10.0516	10.0725	11.2422	11.2645	11.2859
A_55_P1966089	3.72725e-07	3.03041e-06	2.05733	up		chr17:036896861-036896802							510.623	2110.45	9.03434	10.0751	509.895	505.603	516.371	2103.22	2106.48	2121.63	9.00425	9.045	9.05377	10.0872	10.0704	10.0677
A_55_P2013630	3.73147e-07	3.03247e-06	3.46388	up		chr19:024353593-024353534							24.5238	118.739	4.17103	5.96342	24.0705	25.456	24.0449	118.535	115.633	122.048	4.1328	4.19835	4.18195	5.98517	5.92276	5.98233
A_55_P2052385	3.74188e-07	3.03741e-06	7.40127	up	NM_194336	chr5:105702187-105702128	Gbp6	Mus musculus guanylate binding protein 6 (Gbp6), mRNA [NM_194336]	GO:0003674|GO:0071222|GO:0071346|GO:0035458|GO:0050830|GO:0020005|GO:0042832|GO:0051856|GO:0031410	NM_194336	Mm.491210	100702	627.985	8304.86	9.35512	12.2429	625.838	609.784	648.331	7898.47	8593.3	8422.8	9.32066	9.33741	9.40729	12.1727	12.299	12.257
A_55_P2125322	3.77029e-07	3.05253e-06	2.30896	up		chr17:008577185-008577126							38864.7	108934	15.7896	16.9968	39494.4	38026.9	39072.7	112261	107082	107460	15.779	15.776	15.8136	16.9687	17.0026	17.0191
A_51_P400581	3.77531e-07	3.05392e-06	3.04637	up	NM_023210	chr3:95740981-95741040	Anp32e	Mus musculus acidic (leucine-rich) nuclear phosphoprotein 32 family, member E (Anp32e), transcript variant 1, mRNA [NM_023210]	GO:0005737|GO:0016023|GO:0005634|GO:0019212|GO:0043086	NM_023210	Mm.218657	66471	378.644	2237.86	8.5635	10.1706	389.594	362.448	383.89	2173.27	2245.83	2294.48	8.58146	8.52119	8.58785	10.145	10.1734	10.1934
A_55_P1952212	3.77675e-07	3.05392e-06	2.66405	up	XM_003689273	chr12:114974388-114974329	LOC100862489	PREDICTED: Mus musculus uncharacterized LOC100862489 (LOC100862489), mRNA [XM_003689273]		XM_003689273	Mm.425774	100862489	261.137	1330.74	7.97523	9.38885	268.867	257.619	256.924	1343.46	1340.58	1308.17	7.99577	7.97537	7.95454	9.41341	9.40163	9.35151
A_55_P2155197	3.78008e-07	3.05544e-06	2.37199	up	NM_023680	chr7:150826732-150826673	Tnfrsf22	Mus musculus tumor necrosis factor receptor superfamily, member 22 (Tnfrsf22), mRNA [NM_023680]	GO:0005515|GO:0045569|GO:0016020|GO:0005886|GO:0005576|GO:0004872|GO:0016021|GO:0009897	NM_023680	Mm.261384	79202	23.4322	76.6891	4.09726	5.34336	23.2862	24.3096	22.7007	74.9546	75.7618	79.3508	4.08056	4.1181	4.09313	5.33823	5.31791	5.37395
A_51_P418908	3.81926e-07	3.07647e-06	2.24541	up	NM_028451	chr11:57872365-57872424	Larp1	Mus musculus La ribonucleoprotein domain family, member 1 (Larp1), mRNA [NM_028451]	GO:0003674|GO:0005737|GO:0003723|GO:0016239	NM_028451	Mm.248843	73158	133.56	563.608	6.9398	8.10678	137.336	132.256	131.088	550.149	560.773	579.901	6.96569	6.93185	6.92186	8.09334	8.09429	8.1327
A_55_P1986049	3.82711e-07	3.08044e-06	2.58957	up	NM_001159573	chr5:74987847-74987906	Fip1l1	Mus musculus FIP1 like 1 (S. cerevisiae) (Fip1l1), transcript variant 1, mRNA [NM_001159573]	GO:0006397|GO:0005515|GO:0006378|GO:0003723|GO:0005847|GO:0005634	NM_001159573	Mm.272468	66899	168.7	833.001	7.30283	8.67554	174.652	164.727	166.72	835.627	830.431	832.946	7.33985	7.27863	7.29	8.69764	8.66596	8.66301
A_55_P2157102	3.83805e-07	3.08452e-06	2.01635	up		chr13:067561543-067561602							12045.1	38889.4	13.8434	14.8551	12463.8	11670.8	12000.7	39388.8	38656.5	38622.9	13.8721	13.817	13.841	14.8541	14.8596	14.8517
A_51_P485421	3.84423e-07	3.08713e-06	2.32104	up	AK088666	chr12:114659689-114659630		immunoglobulin heavy constant mu [Source:MGI Symbol;Acc:MGI:96448] [ENSMUST00000103426]			Mm.342177		4416.15	19165.1	12.3541	13.5689	4432.46	4462.02	4353.98	19202.4	19032.1	19260.7	12.3293	12.3918	12.3412	13.5737	13.565	13.5679
A_51_P208919	3.85112e-07	3.08912e-06	2.07786	up	NM_028250	chr1:157405979-157411835	Acbd6	Mus musculus acyl-Coenzyme A binding domain containing 6 (Acbd6), transcript variant 1, mRNA [NM_028250]	GO:0008150|GO:0003674|GO:0005737|GO:0005634|GO:0000062|GO:0008289	NM_028250	Mm.288249	72482	853.373	3578.03	9.84935	10.9045	878.317	837.59	844.211	3521.78	3606.66	3605.65	9.87792	9.84048	9.82967	10.8915	10.9199	10.902
A_52_P520408	3.85918e-07	3.09205e-06	2.30863	up	NM_030685	chr3:58327639-58327580	Serp1	Mus musculus stress-associated endoplasmic reticulum protein 1 (Serp1), mRNA [NM_030685]	GO:0060124|GO:0005881|GO:0046622|GO:0005783|GO:0045727|GO:0010259|GO:0009791|GO:0015031|GO:0030968|GO:0048644|GO:0001501|GO:0016020|GO:0006810|GO:0006006|GO:0006486|GO:0032024|GO:0016021	NM_030685	Mm.29702	28146	5125.22	21459.8	12.5528	13.7598	5313.48	5004.29	5057.9	21435.6	21593.2	21350.7	12.5821	12.5369	12.5393	13.7574	13.7824	13.7396
A_55_P2307496	3.87072e-07	3.0939e-06	2.08982	up	XM_003946129	chr4:32327429-32327488	LOC101056168	PREDICTED: Mus musculus uncharacterized LOC101056168 (LOC101056168), mRNA [XM_003946129]		XM_003946129		101056168	518.952	2170.05	9.05899	10.1224	531.544	500.019	525.291	2144.95	2183.66	2181.55	9.07143	9.02619	9.07936	10.1199	10.1295	10.1177
A_51_P431772	3.88956e-07	3.1031e-06	2.53772	up	AK006243	chr7:3569447-3569506	Ndufa3	NADH dehydrogenase (ubiquinone) 1 alpha subcomplex, 3 [Source:MGI Symbol;Acc:MGI:1913341] [ENSMUST00000150497]	GO:0005739|GO:0008150|GO:0003674|GO:0005747|GO:0016020|GO:0070469|GO:0006810|GO:0005743|GO:0016021|GO:0055114		Mm.17851	66091	82.9214	367.824	6.16495	7.50848	83.6213	83.4455	81.6973	371.52	361.07	370.883	6.15469	6.18583	6.15431	7.54284	7.47837	7.50423
A_55_P2178423	3.90355e-07	3.10865e-06	4.64454	up		chr6:083982104-083982163							114.565	967.313	6.68876	8.90429	117.475	116.944	109.276	936.13	974.649	991.159	6.71052	6.72771	6.62804	8.86986	8.91591	8.92711
A_52_P451378	3.91825e-07	3.11682e-06	2.33097	up	NM_023053	chr17:66272810-66272751	Twsg1	Mus musculus twisted gastrulation homolog 1 (Drosophila) (Twsg1), mRNA [NM_023053]	GO:0005515|GO:0030097|GO:0001707|GO:0005576|GO:0007275|GO:0009790|GO:0030509|GO:0005615|GO:0030154|GO:0030514|GO:0030513|GO:0045668|GO:0001503|GO:0009888|GO:0043010|GO:0030900|GO:0007435	NM_023053	Mm.10153	65960	810.623	3760.66	9.76233	10.9833	842.009	782.702	807.158	3715.63	3791.61	3774.74	9.79582	9.73106	9.7601	10.9805	10.9939	10.9754
A_55_P2381538	3.94631e-07	3.13558e-06	2.40878	up	AK031601	chr8:20009955-20009896		Mus musculus 13 days embryo male testis cDNA, RIKEN full-length enriched library, clone:6030458H09 product:unclassifiable, full insert sequence. [AK031601]			Mm.491505		2932.1	13876.8	11.756	13.0243	2955.77	2967.94	2872.59	13752.3	13796.5	14081.6	11.7447	11.7937	11.7296	13.0183	13.0177	13.0368
A_51_P128397	3.951e-07	3.13693e-06	3.48923	up	NM_015743	chr4:48080690-48083876	Nr4a3	Mus musculus nuclear receptor subfamily 4, group A, member 3 (Nr4a3), mRNA [NM_015743]	GO:0042542|GO:0003700|GO:0006366|GO:0003707|GO:0005634|GO:0048752|GO:0046872|GO:0043524|GO:0007411|GO:0045944|GO:0060005|GO:0050885|GO:0043401|GO:0030534|GO:0004879|GO:0005667|GO:0006355|GO:0043066|GO:0001707|GO:0042472|GO:0003677|GO:0045787|GO:0006351|GO:0043565|GO:0021766|GO:0001077|GO:2000108|GO:0008270	NM_015743	Mm.247261	18124	5	34.9674	2.37858	4.18149	5	5	5	34.1671	36.3778	34.3573	2.37763	2.37576	2.38233	4.17274	4.23521	4.13651
A_66_P125071	3.98211e-07	3.15631e-06	2.26366	up	NM_009278	chr2:69704334-69704587	Ssb	Mus musculus Sjogren syndrome antigen B (Ssb), mRNA [NM_009278]	GO:0006396|GO:0000166|GO:0030529|GO:0003723|GO:0005634|GO:0003676|GO:0008033	NM_009278	Mm.10508	20823	839.733	3793.56	9.81986	10.9985	845.305	819.679	854.215	3735.66	3789.06	3855.95	9.80189	9.80309	9.85459	10.9903	10.9917	11.0135
A_55_P1997097	4.01211e-07	3.17348e-06	3.19324	up	NM_001024919	chr11:31566902-31566843	Bod1	Mus musculus biorientation of chromosomes in cell division 1 (Bod1), mRNA [NM_001024919]	GO:0008150|GO:0003674|GO:0007067|GO:0007049|GO:0005737|GO:0005694|GO:0000776|GO:0005575|GO:0005856|GO:0000775|GO:0051301	NM_001024919	Mm.34183	69556	150.955	905.976	7.13211	8.80713	153.538	151.322	148.005	918.444	910.125	889.36	7.1389	7.14881	7.10861	8.84418	8.81525	8.76195
A_55_P1972322	4.01418e-07	3.17392e-06	2.08106	up	NM_009770	chr17:50839065-50839124	Btg3	Mus musculus B cell translocation gene 3 (Btg3), mRNA [NM_009770]	GO:0005515|GO:0005737|GO:0045930	NM_009770	Mm.392910	12228	4614.39	17964.5	12.4152	13.4725	4705.53	4505.63	4632.02	17614.5	18149.1	18130.1	12.4223	12.4031	12.4202	13.4415	13.494	13.4821
A_55_P1976450	4.01824e-07	3.17472e-06	2.75879	up									451.453	2450.45	8.83985	10.3039	467.708	442.776	443.875	2477.4	2429.87	2444.09	8.87104	8.83626	8.81226	10.3358	10.2931	10.2827
A_55_P2147971	4.02747e-07	3.1765e-06	2.03555	up	NM_011239	chr16:18240131-18240072	Ranbp1	Mus musculus RAN binding protein 1 (Ranbp1), mRNA [NM_011239]	GO:0005813|GO:0005737|GO:0046907|GO:0046604|GO:0007051|GO:0005096	NM_011239	Mm.235287	19385	3002.25	11952.7	11.7896	12.815	3074.11	2907.37	3025.27	11834.1	12026.1	11997.9	11.7962	11.7615	11.8111	12.8043	12.8295	12.8113
A_51_P293938	4.03094e-07	3.1765e-06	4.48259	up	NM_026878	chr5:74595213-74595272	Rasl11b	Mus musculus RAS-like, family 11, member B (Rasl11b), mRNA [NM_026878]	GO:0006184|GO:0007165|GO:0016020|GO:0000166|GO:0007264|GO:0003924|GO:0005525	NM_026878	Mm.293316	68939	75.6506	586.172	6.00192	8.16626	79.553	74.3994	72.9994	577.379	591.419	589.718	6.06924	5.98002	5.95651	8.16684	8.17639	8.15554
A_52_P518233	4.03113e-07	3.1765e-06	5.56532	up	AK036277	chr2:156760722-156760663	Ndrg3	Mus musculus 16 days neonate cerebellum cDNA, RIKEN full-length enriched library, clone:9630053D03 product:N-myc downstream regulated 3, full insert sequence. [AK036277]	GO:0008150|GO:0003674|GO:0005737			29812	135.501	1371.47	6.95795	9.43442	137.299	129.079	140.124	1341.96	1371.54	1400.91	6.96484	6.88978	7.01924	9.41115	9.43415	9.45795
A_55_P2094034	4.03393e-07	3.1765e-06	2.14047	up	NM_001167891	chr18:36177391-36177332	Nrg2	Mus musculus neuregulin 2 (Nrg2), mRNA [NM_001167891]	GO:0005006|GO:0005154|GO:0007173|GO:0018108|GO:0043125	NM_001167891	Mm.380390	100042150	55.9651	190.618	5.49981	6.59774	56.9109	55.2789	55.7055	187.775	188.101	195.978	5.50821	5.47472	5.5165	6.59905	6.57592	6.61825
A_55_P2001628	4.05272e-07	3.1807e-06	2.64441	up	NR_003634	chr6:148304043-148304102	Rps4y2	Mus musculus ribosomal protein S4, Y-linked 2 (Rps4y2), non-coding RNA [NR_003634]	GO:0008150|GO:0003674|GO:0005575	NR_003634	Mm.391542	66184	69.7604	312.175	5.87409	7.27704	71.2245	70.5688	67.488	310.301	314.44	311.784	5.8877	5.90149	5.83308	7.28865	7.28245	7.26002
A_52_P474765	4.06713e-07	3.18617e-06	2.36202	up	NM_026603	chr5:124374779-124374838	Denr	Mus musculus density-regulated protein (Denr), mRNA [NM_026603]	GO:0008150|GO:0003674|GO:0003743|GO:0005575|GO:0006413	NM_026603	Mm.28549	68184	1003.94	4703.24	10.1056	11.3456	1003.18	983.653	1024.99	4581.56	4775.65	4752.5	10.0824	10.0998	10.1346	11.321	11.3643	11.3515
A_55_P2131707	4.09175e-07	3.19977e-06	2.44437	up	NM_145376	chr13:73651927-73651986	Lpcat1	Mus musculus lysophosphatidylcholine acyltransferase 1 (Lpcat1), mRNA [NM_145376]	GO:0005811|GO:0006629|GO:0045732|GO:0047184|GO:0005794|GO:0016746|GO:0060041|GO:0005783|GO:0005509|GO:2001246|GO:0008654|GO:0046872|GO:0047191|GO:0047192|GO:0016020|GO:0008152|GO:0043129|GO:0016021|GO:0047159|GO:0016740|GO:0036151	NM_145376	Mm.284649	210992	103.581	457.35	6.51988	7.80934	104.832	101.01	104.901	458.679	455.498	457.872	6.5129	6.49317	6.55357	7.83066	7.80246	7.7949
A_52_P219943	4.09403e-07	3.19977e-06	2.84368	up	NM_001276350	chr18:6489218-6489159	Epc1	Mus musculus enhancer of polycomb homolog 1 (Drosophila) (Epc1), transcript variant 3, mRNA [NM_001276350]	GO:0006355|GO:0031965|GO:0005634|GO:0000122|GO:0006351|GO:0032777|GO:0043967|GO:0045944|GO:0045814|GO:0043968|GO:0035267|GO:0051155|GO:0005654|GO:0045892|GO:0004402|GO:0040008|GO:0016568	NM_001276350	Mm.312133	13831	1260.4	6994.66	10.4564	11.9641	1274.67	1235.15	1271.38	6753.02	7109.84	7121.1	10.4426	10.4531	10.4735	11.9194	11.9925	11.9805
A_55_P2183172	4.11874e-07	3.21331e-06	2.32016	up	NM_001104617	chr9:51877730-51877789	Rdx	Mus musculus radixin (Rdx), transcript variant 3, mRNA [NM_001104617]	GO:0005515|GO:0008092|GO:0005886|GO:0030033|GO:0045177|GO:0032420|GO:0030496|GO:0030315|GO:0045176|GO:0003779|GO:0030175|GO:0032154|GO:0001726|GO:0030027|GO:0051693|GO:0005902|GO:0051286|GO:0051016|GO:0005737|GO:0005913|GO:0016020|GO:0005856|GO:0005925|GO:0019898	NM_001104617	Mm.245746	19684	571.607	2636.34	9.20561	10.4198	579.069	553.562	582.191	2580.67	2653.14	2675.2	9.1999	9.17949	9.23745	10.4001	10.4317	10.4277
A_55_P2094064	4.119e-07	3.21331e-06	10.3684	up									9.22389	140.801	2.80835	6.18248	8.22181	9.93445	9.51542	138.327	140.653	143.423	2.70754	2.82312	2.8944	6.17656	6.17932	6.19155
A_55_P2081055	4.13078e-07	3.22008e-06	2.9308	up	NM_028516	chr1:185857094-185857035	1700056E22Rik	Mus musculus RIKEN cDNA 1700056E22 gene (1700056E22Rik), mRNA [NM_028516]	GO:0008150|GO:0003674|GO:0005575	NM_028516	Mm.50115	73363	378.053	2157.59	8.56102	10.1123	377.669	383.193	373.298	2127.75	2184.36	2160.67	8.53247	8.60727	8.54332	10.1074	10.1304	10.0991
A_52_P228079	4.17629e-07	3.24476e-06	2.01464	up	NM_007497	chr15:100090547-100090606	Atf1	Mus musculus activating transcription factor 1 (Atf1), mRNA [NM_007497]	GO:0005667|GO:0006355|GO:0003700|GO:0046982|GO:0006366|GO:0003705|GO:0045740|GO:0005634|GO:0003677|GO:0032403|GO:0006351|GO:0043623|GO:0043565|GO:0045944|GO:0010976	NM_007497	Mm.676	11908	905.145	3711.27	9.95157	10.9621	903.882	902.621	908.931	3682.7	3703.8	3747.32	9.92051	9.97545	9.95874	10.966	10.958	10.9622
A_55_P2106414	4.2171e-07	3.26922e-06	2.80941	up	NM_207104	chrX:70682659-70682654	Haus7	Mus musculus HAUS augmin-like complex, subunit 7 (Haus7), transcript variant 2, mRNA [NM_207104]	GO:0005813|GO:0005886|GO:0005874|GO:0005730|GO:0031996|GO:0051225|GO:0051297|GO:0005737|GO:0007049|GO:0007067|GO:0070652|GO:0005856|GO:0051301	NM_207104	Mm.264899	73738	58.6438	267.783	5.57751	7.06778	59.1246	57.9471	58.8596	271.87	266.326	265.154	5.57293	5.55589	5.60371	7.10507	7.06087	7.0374
A_52_P309337	4.22424e-07	3.27355e-06	2.73192	up	NM_019648	chr10:93321764-93321705	Metap2	Mus musculus methionine aminopeptidase 2 (Metap2), mRNA [NM_019648]	GO:0005515|GO:0005737|GO:0016787|GO:0016485|GO:0004177|GO:0008235|GO:0006508|GO:0018206|GO:0008233|GO:0046872|GO:0031365	NM_019648	Mm.289329	56307	117.636	595.105	6.73636	8.18628	119.414	114.976	118.517	583.203	607.92	594.192	6.73445	6.70649	6.76816	8.17425	8.21705	8.16753
A_55_P2127425	4.24143e-07	3.28324e-06	2.21365	up	NM_025575	chr2:164289899-164289958	Sys1	Mus musculus SYS1 Golgi-localized integral membrane protein homolog (S. cerevisiae) (Sys1), mRNA [NM_025575]	GO:0008150|GO:0003674|GO:0005794|GO:0016020|GO:0000139|GO:0006810|GO:0016021|GO:0005575|GO:0015031	NM_025575	Mm.44218	66460	729.6	3221.83	9.5922	10.7386	731.067	734.602	723.13	3206.62	3193.67	3265.18	9.57081	9.62667	9.57911	10.7477	10.7252	10.7429
A_55_P1963017	4.26585e-07	3.29865e-06	2.34405	up	NM_001082543	chr16:36285398-36285457	Stfa1	Mus musculus stefin A1 (Stfa1), mRNA [NM_001082543]	GO:0010951|GO:0005737|GO:0004866	NM_001082543	Mm.327618	20861	200.918	907.475	7.57899	8.80799	206.104	197.35	199.301	900.497	888.375	933.551	7.59443	7.57651	7.56602	8.81704	8.77278	8.83415
A_55_P2437253	4.26918e-07	3.29865e-06	2.41672	up	NM_144931	chr8:107043503-107042163	Nae1	Mus musculus NEDD8 activating enzyme E1 subunit 1 (Nae1), mRNA [NM_144931]	GO:0005886|GO:0046982|GO:0045116|GO:0006915|GO:0042981|GO:0003824|GO:0051402|GO:0043523|GO:0007049|GO:0016020|GO:0033314|GO:0019781|GO:0031625	NM_144931	Mm.237670	234664	613.325	2904.98	9.3163	10.5894	620.421	591.368	628.186	2897.41	2896.31	2921.21	9.30681	9.28734	9.35474	10.6006	10.5841	10.5834
A_55_P2181634	4.27972e-07	3.30243e-06	2.11413	up	AV253706	chr15:9508055-9507996	Spef2	sperm flagellar 2 [Source:MGI Symbol;Acc:MGI:2443727] [ENSMUST00000160236]	GO:0005515|GO:0005794|GO:0035082|GO:0002177|GO:0097225|GO:0048705|GO:0010259|GO:0007283|GO:0048702|GO:0005524|GO:0048854|GO:0019205|GO:0009566|GO:0005737|GO:0006139|GO:0060541|GO:0060271|GO:0002520		Mm.458360	320277	106.146	406.018	6.56041	7.64048	106.761	107.665	104.013	402.979	405.183	409.893	6.54559	6.59515	6.54049	7.64593	7.6366	7.6389
A_55_P1959384	4.29882e-07	3.31182e-06	4.23836	up	X06771	chr14:53475331-53475390		T cell receptor alpha variable 14D-1 [Source:MGI Symbol;Acc:MGI:3651279] [ENSMUST00000181038]			Mm.359466		105.52	809.132	6.5493	8.63281	109.67	105.873	101.018	790.334	823.18	813.882	6.59173	6.57051	6.48567	8.61817	8.6535	8.62676
A_55_P2102624	4.36916e-07	3.35495e-06	2.63778	up	NM_001113401	chr16:36793964-36793905	Eaf2	Mus musculus ELL associated factor 2 (Eaf2), transcript variant 2, mRNA [NM_001113401]	GO:0060770|GO:0005515|GO:0030308|GO:0006355|GO:0032783|GO:0005654|GO:0005634|GO:0045893|GO:0097193|GO:0006351	NM_001113401	Mm.432078	106389	326.444	1654.47	8.32431	9.72363	332.889	328.668	317.775	1628.01	1656.02	1679.38	8.33402	8.35807	8.28084	9.71858	9.72372	9.7286
A_52_P194464	4.37389e-07	3.35736e-06	6.84546	up	NM_023507	chr13:63926129-63926188	Ercc6l2	Mus musculus excision repair cross-complementing rodent repair deficiency, complementation group 6 like 2 (Ercc6l2), transcript variant 2, mRNA [NM_023507]	GO:0008026|GO:0004386|GO:0005634|GO:0005575|GO:0003676|GO:0003677|GO:0005524|GO:0006974|GO:0008150|GO:0005737|GO:0006281|GO:0016787|GO:0000166|GO:0005856	NM_023507	Mm.186610	76251	10.3282	97.1413	2.90951	5.68466	9.98386	11.7252	9.27549	95.7536	99.8917	95.7786	2.86705	2.99149	2.86999	5.68551	5.71889	5.64959
A_55_P2083401	4.41609e-07	3.37869e-06	2.04896	up	NM_001110239	chr12:31580534-31580475	Acp1	Mus musculus acid phosphatase 1, soluble (Acp1), transcript variant 1, mRNA [NM_001110239]	GO:0043005|GO:0017124|GO:0003993|GO:0005634|GO:0035335|GO:0016791|GO:0005737|GO:0006470|GO:0016787|GO:0016311|GO:0009898|GO:0004721|GO:0004725|GO:0004726	NM_001110239	Mm.359831	11431	586.065	2409.33	9.24458	10.2795	585.911	576.78	595.504	2372.57	2429.67	2425.74	9.21483	9.25076	9.26814	10.2735	10.2928	10.2722
A_51_P386539	4.42422e-07	3.37899e-06	3.79418	up	NM_026301	chr18:21141783-21141842	Rnf125	Mus musculus ring finger protein 125 (Rnf125), mRNA [NM_026301]	GO:0008150|GO:0016874|GO:0008270|GO:0005575|GO:0046872	NM_026301	Mm.45980	67664	664.593	4774.15	9.44179	11.3656	674.385	657.697	661.696	4896.76	4819.89	4605.81	9.43496	9.4485	9.4419	11.4128	11.378	11.3059
A_55_P2113160	4.44818e-07	3.39333e-06	2.07921	up	NM_010762	chr2:127459035-127458976	Mal	Mus musculus myelin and lymphocyte protein, T cell differentiation protein (Mal), transcript variant 1, mRNA [NM_010762]	GO:0005794|GO:0016020|GO:0005886|GO:0005783|GO:0042552|GO:0045121|GO:0019911|GO:0016021|GO:0019898	NM_010762	Mm.39040	17153	138.297	540.642	6.99531	8.05134	140.227	139.759	134.904	537.097	543.315	541.515	6.99926	7.02213	6.96454	8.05806	8.05408	8.04189
A_55_P2003004	4.45778e-07	3.39774e-06	2.37095	up	NM_009797	chr3:104625779-104625720	Capza1	Mus musculus capping protein (actin filament) muscle Z-line, alpha 1 (Capza1), mRNA [NM_009797]	GO:0005515|GO:0051016|GO:0005737|GO:0051015|GO:0030036|GO:0016020|GO:0071203|GO:0030863|GO:0008290|GO:0003779|GO:0005856|GO:0051693	NM_009797	Mm.19142	12340	53.5536	200.948	5.42687	6.67234	54.529	52.8241	53.3075	193.188	202.235	207.423	5.44169	5.40404	5.43488	6.64006	6.67923	6.69773
A_51_P253984	4.46844e-07	3.40015e-06	2.12768	up	NM_008791	chr16:96747241-96747300	Pcp4	Mus musculus Purkinje cell protein 4 (Pcp4), mRNA [NM_008791]	GO:0005516|GO:0005634|GO:0005829	NM_008791	Mm.5023	18546	134.818	537.653	6.95478	8.04406	136.792	136.432	131.23	536.382	537.942	538.636	6.95842	6.98202	6.92389	8.05593	8.04154	8.0347
A_52_P256399	4.5029e-07	3.41702e-06	4.23547	up	NM_026518	chr10:29067330-29067271	Rnf146	Mus musculus ring finger protein 146 (Rnf146), transcript variant 4, mRNA [NM_026518]	GO:0004842|GO:0072572|GO:0016874|GO:0090263|GO:0005634|GO:0046872|GO:0005829|GO:0051865|GO:0005737|GO:0042787|GO:0008270|GO:0016055|GO:0070936	NM_026518	Mm.475694	68031	197.217	1554.95	7.55158	9.63411	191.376	197.676	202.6	1548.41	1531.53	1584.91	7.48661	7.57899	7.58915	9.64231	9.61198	9.64803
A_55_P2130219	4.51068e-07	3.41745e-06	6.53862	up	NM_133780	chr1:152271044-152271103	Tpr	Mus musculus translocated promoter region (Tpr), mRNA [NM_133780]	GO:0005515|GO:0072686|GO:0090267|GO:0006606|GO:0015031|GO:0042803|GO:0006405|GO:0034605|GO:0006404|GO:0000166|GO:0031072|GO:0006810|GO:0005856|GO:0031453|GO:0051019|GO:0031965|GO:0005694|GO:0090316|GO:0000122|GO:0070849|GO:0007049|GO:0070840|GO:0034399|GO:0000776|GO:0042307|GO:0042306|GO:0046832|GO:0000775|GO:0019898|GO:0042405|GO:0051301|GO:0007094|GO:0035457|GO:0004828|GO:0005634|GO:0005635|GO:…	NM_133780	Mm.174256	108989	42.9228	445.775	5.0653	7.77428	44.5527	40.9832	43.2325	439.407	455.165	442.752	5.10827	4.98031	5.10732	7.77208	7.80031	7.75046
A_52_P355197	4.52259e-07	3.42402e-06	2.32148	up	NM_010269	chr3:99998514-100000486	Gdap2	Mus musculus ganglioside-induced differentiation-associated-protein 2 (Gdap2), transcript variant 1, mRNA [NM_010269]	GO:0003674|GO:0032526|GO:0005765	NM_010269	Mm.279228	14547	208.883	934.832	7.63877	8.85381	216.084	205.888	204.678	918.202	947.476	938.819	7.66679	7.64284	7.60668	8.8418	8.87372	8.84592
A_51_P168981	4.53571e-07	3.4318e-06	3.81674	up	NM_028208	chr19:23794956-23795015	Ptar1	Mus musculus protein prenyltransferase alpha subunit repeat containing 1 (Ptar1), mRNA [NM_028208]	GO:0008150|GO:0003674|GO:0005575	NM_028208	Mm.474795	72351	139.417	987.73	7.00411	8.93645	142.157	134.18	141.914	951.268	995.975	1015.95	7.02025	6.95509	7.037	8.89743	8.94774	8.96419
A_52_P424767	4.53614e-07	3.4318e-06	2.66754	up	NM_009030	chr4:128984682-128984623	Rbbp4	Mus musculus retinoblastoma binding protein 4 (Rbbp4), mRNA [NM_009030]	GO:0005515|GO:0006355|GO:0033186|GO:0042826|GO:0005634|GO:0006351|GO:0006260|GO:0007049|GO:0035098|GO:0016581|GO:0031497|GO:0006338|GO:0016589|GO:0008094|GO:0016568	NM_009030	Mm.12145	19646	190.876	974.832	7.50019	8.91571	193.912	184.118	194.597	948.744	987.649	988.104	7.50423	7.46309	7.53326	8.89308	8.93225	8.92178
A_51_P239673	4.56894e-07	3.44794e-06	2.05517	up	NM_013556	chrX:50374757-50374816	Hprt	Mus musculus hypoxanthine guanine phosphoribosyl transferase (Hprt), mRNA [NM_013556]	GO:0046040|GO:0046083|GO:0046872|GO:0042803|GO:0005829|GO:0042802|GO:0045964|GO:0006178|GO:0005737|GO:0042417|GO:0000166|GO:0051289|GO:0032264|GO:0019835|GO:0032263|GO:0046038|GO:0007610|GO:0043103|GO:0007626|GO:0007625|GO:0021895|GO:0000287|GO:0016757|GO:0052657|GO:0004422|GO:0021954|GO:0048813|GO:0006166|GO:0021756|GO:0001975|GO:0006168|GO:0046100|GO:0009116|GO:0046651|GO:0016740|GO:0006164	NM_013556	Mm.299381	15452	7224.58	26781.3	13.0819	14.1212	7282.91	7260.65	7130.2	26760.9	26871.2	26711.8	13.0643	13.1128	13.0687	14.1116	14.1363	14.1157
A_55_P2070936	4.58291e-07	3.45352e-06	2.32463	up	NM_009186	chr16:22246501-22246442	Tra2b	Mus musculus transformer 2 beta homolog (Drosophila) (Tra2b), mRNA [NM_009186]	GO:0048026|GO:0008380|GO:0006397|GO:0000166|GO:0000398|GO:0000381|GO:0003723|GO:0005634|GO:0003729|GO:0003676	NM_009186	Mm.210352	20462	800.28	3706.18	9.74263	10.9596	802.857	797.455	800.528	3589.01	3756.22	3773.32	9.71983	9.7601	9.74797	10.927	10.9774	10.9745
A_55_P2328920	4.59532e-07	3.45791e-06	2.56468	up	NM_011600	chr19:14524265-14524206	Tle4	Mus musculus transducin-like enhancer of split 4, homolog of Drosophila E(spl) (Tle4), mRNA [NM_011600]	GO:0005515|GO:0006355|GO:0006357|GO:0006366|GO:0003705|GO:0003714|GO:0005634|GO:0000122|GO:0006351|GO:0003682|GO:0070491|GO:0016055|GO:0045892	NM_011600	Mm.103638	21888	237.307	1168.97	7.82506	9.18383	242.696	237.891	231.335	1177.31	1151.12	1178.48	7.83305	7.84925	7.79287	9.21168	9.15943	9.18039
A_55_P2072995	4.60226e-07	3.46159e-06	21.7596	up	AJ278076	chr6:67863987-67864045		Mus musculus partial mRNA for immunoglobulin light chain variable region (IGLV1 gene),antibody 8H4. [AJ278076]			Mm.424501		121.853	4370.05	6.78768	11.2313	117.121	132.546	115.89	4323.83	4390.97	4395.35	6.7051	6.93518	6.72277	11.2269	11.2371	11.2298
A_55_P2021358	4.60965e-07	3.46159e-06	2.72883	up	NM_001039060	chrX:91499311-91499370	Klhl15	Mus musculus kelch-like 15 (Klhl15), transcript variant 2, mRNA [NM_001039060]	GO:0008150|GO:0003674|GO:0005575	NM_001039060	Mm.238117	236904	214.246	1122.38	7.67538	9.12366	220.737	204.788	217.213	1098.95	1118.03	1150.15	7.69715	7.63356	7.69542	9.10758	9.11622	9.14717
A_55_P2181029	4.61586e-07	3.46346e-06	2.68087	up		chr7:080700120-080700061							926.271	4931.67	9.98745	11.4102	919.875	930.638	928.302	4801.23	5004	4989.79	9.9484	10.0174	9.99654	11.3872	11.4277	11.4156
A_52_P107234	4.62681e-07	3.46673e-06	3.35538	up	NM_177806	chr12:66162760-66162819	Prpf39	Mus musculus PRP39 pre-mRNA processing factor 39 homolog (yeast) (Prpf39), mRNA [NM_177806]	GO:0008380|GO:0006397|GO:0005622|GO:0008150|GO:0006396|GO:0003674|GO:0005634	NM_177806	Mm.283339	328110	394.41	2567.87	8.62853	10.375	407.792	375.305	400.134	2493	2595.23	2615.38	8.65478	8.57766	8.65313	10.3467	10.3874	10.3908
A_55_P2100008	4.66802e-07	3.48272e-06	2.0212	up		chrX:106584025-106583966		IF4B_MOUSE (Q8BGD9) Eukaryotic translation initiation factor 4B (eIF-4B), partial (11%) [TC1685411]					4145.91	16149	12.2666	13.2818	4261.3	4069.9	4106.52	16346.3	15863.3	16237.6	12.2755	12.2656	12.2587	13.3094	13.2531	13.2831
A_55_P2244722	4.67619e-07	3.48382e-06	2.4591	up	NM_001001176	chrX:103403866-103403807	Taf9b	Mus musculus TAF9B RNA polymerase II, TATA box binding protein (TBP)-associated factor (Taf9b), transcript variant 2, mRNA [NM_001001176]	GO:0006352|GO:0003674|GO:0043066|GO:0006355|GO:0005669|GO:0046982|GO:0030307|GO:0050821|GO:0005634|GO:0000122|GO:0006351|GO:0033276	NM_001001176	Mm.19440	407786	130.658	599.344	6.90212	8.20025	134.116	129.967	127.892	603.698	590.638	603.697	6.92425	6.90168	6.88042	8.23368	8.17384	8.19323
A_55_P2154132	4.67798e-07	3.48382e-06	2.32237	up	NM_011654	chr15:98761982-98761923	Tuba1b	Mus musculus tubulin, alpha 1B (Tuba1b), mRNA [NM_011654]	GO:0003725|GO:0005515|GO:0005881|GO:0051258|GO:0005874|GO:0003924|GO:0005525|GO:0006184|GO:0043234|GO:0005737|GO:0000166|GO:0015630|GO:0005200|GO:0071353|GO:0005856|GO:0007017	NM_011654	Mm.392113	22143	15679.7	51608.1	14.2404	15.4559	15806.9	15641.1	15591	51850.7	51382.9	51590.6	14.2249	14.2573	14.2389	15.4201	15.4705	15.4773
A_55_P2090330	4.68435e-07	3.48501e-06	3.491	up	NM_021452	chr10:115855036-115854977	Kcnmb4	Mus musculus potassium large conductance calcium-activated channel, subfamily M, beta member 4 (Kcnmb4), mRNA [NM_021452]	GO:0005513|GO:0005267|GO:0019228|GO:0016020|GO:0005887|GO:0008076|GO:0006810|GO:0001508|GO:0016021|GO:0006813|GO:0015269|GO:0071805|GO:0006811	NM_021452	Mm.440652	58802	224.125	1467.7	7.74075	9.54439	221.256	228.788	222.331	1428.85	1471.08	1503.15	7.69954	7.79159	7.73111	9.51821	9.55224	9.56272
A_52_P611798	4.69325e-07	3.49039e-06	2.32836	up	NM_007840	chr11:106641767-106641708	Ddx5	Mus musculus DEAD (Asp-Glu-Ala-Asp) box polypeptide 5 (Ddx5), mRNA [NM_007840]	GO:0005515|GO:0008380|GO:0005516|GO:0003724|GO:0006200|GO:0003723|GO:0045069|GO:0005634|GO:0050681|GO:0071013|GO:0016818|GO:0004004|GO:0000166|GO:0000381|GO:0045944|GO:0005681|GO:2001014|GO:0036002|GO:0003712|GO:0006397|GO:0008026|GO:0006355|GO:0030331|GO:0003713|GO:0060765|GO:0004386|GO:0000122|GO:0003676|GO:0001701|GO:0005524|GO:0006351|GO:0045667|GO:0072332|GO:0016787|GO:0030529|GO:0043517|GO:…	NM_007840	Mm.491096	13207	13711.5	47520.1	14.0442	15.2635	14144	13077	13913.4	48430.1	47063.1	47067.1	14.056	14.0045	14.0721	15.2647	15.2629	15.2629
A_55_P2073163	4.69681e-07	3.49055e-06	5.17763	up	AK079707	chr2:157194079-157194138	Manbal	Mus musculus 0 day neonate thymus cDNA, RIKEN full-length enriched library, clone:A430022J01 product:unclassifiable, full insert sequence. [AK079707]	GO:0008150|GO:0003674|GO:0016020|GO:0016021|GO:0005575		Mm.228619	69161	58.4302	503.016	5.57126	7.94355	61.7837	56.7402	56.7666	492.963	504.962	511.123	5.64882	5.51912	5.54584	7.93818	7.94218	7.9503
A_66_P103926	4.69872e-07	3.49055e-06	2.20998	up	NM_145380	chr2:104841467-104840440	Eif3m	Mus musculus eukaryotic translation initiation factor 3, subunit M (Eif3m), mRNA [NM_145380]	GO:0008150|GO:0003674|GO:0005737|GO:0005852|GO:0003743|GO:0006412|GO:0006413	NM_145380	Mm.379278	98221	10388.3	36957.9	13.6212	14.7652	10555.6	10379.5	10229.9	37728.8	36505.4	36639.5	13.6123	13.6535	13.5977	14.7833	14.7522	14.7601
A_55_P2116650	4.70276e-07	3.49075e-06	2.16591	up	AK144717	chr19:4062498-4062439		Mus musculus lung RCB-0558 LLC cDNA, RIKEN full-length enriched library, clone:G730026I11 product:unclassifiable, full insert sequence. [AK144717]			Mm.332931		12729.6	42527.2	13.9283	15.0433	13060.8	12321.1	12806.8	43163.2	42150.8	42267.5	13.9461	13.8915	13.9473	15.0429	15.0379	15.049
A_66_P131788	4.72214e-07	3.49867e-06	6.03593	up	NM_145393	chr4:131761165-131761106	Ythdf2	Mus musculus YTH domain family 2 (Ythdf2), mRNA [NM_145393]	GO:0008150|GO:0003674|GO:0005575	NM_145393	Mm.23998	213541	67.6215	695.347	5.82331	8.41689	66.5892	70.8091	65.4663	682.171	697.302	706.568	5.77846	5.90962	5.78186	8.40709	8.41945	8.42412
A_52_P428496	4.726e-07	3.49867e-06	2.09859	up	NM_016802	chr9:108239913-108239972	Rhoa	Mus musculus ras homolog gene family, member A (Rhoa), mRNA [NM_016802]	GO:0005515|GO:0033688|GO:0043931|GO:0030307|GO:0042995|GO:0021861|GO:0030154|GO:0036089|GO:0005622|GO:0043524|GO:0043525|GO:0021795|GO:0000166|GO:0030838|GO:0060548|GO:0051924|GO:0005856|GO:0005938|GO:0043124|GO:2000177|GO:0030334|GO:0032467|GO:0019904|GO:0030027|GO:0006184|GO:0043280|GO:0007049|GO:0007519|GO:0007229|GO:0051496|GO:0050773|GO:0017022|GO:0051301|GO:0071803|GO:0030424|GO:0030036|GO:…	NM_016802	Mm.757	11848	2997.78	12335.4	11.7886	12.858	2980.08	3001.76	3011.48	12268	12313	12425.1	11.753	11.8087	11.8041	12.8545	12.8588	12.8607
A_55_P1981455	4.80384e-07	3.53762e-06	2.61893	up									1454.77	7477.02	10.6842	12.0732	1498.96	1398.8	1466.54	7390.43	7583.44	7457.2	10.7036	10.6462	10.703	12.0645	12.0999	12.0553
A_66_P130602	4.81255e-07	3.53949e-06	2.35113	up	NM_001033222	chr19:59373902-59373843	Pdzd8	Mus musculus PDZ domain containing 8 (Pdzd8), mRNA [NM_001033222]	GO:0003674|GO:0022604|GO:0007010|GO:0005575|GO:0046872	NM_001033222	Mm.268797	107368	333.707	1511.78	8.3604	9.59376	336.775	324.203	340.142	1477.31	1531.93	1526.1	8.35214	8.33473	8.39433	9.57574	9.6133	9.59224
A_55_P2161958	4.83323e-07	3.54932e-06	2.11646	up	NM_001177832	chr13:66223293-66223352	Gm10324	Mus musculus predicted gene 10324 (Gm10324), mRNA [NM_001177832]	GO:0008150|GO:0003674|GO:0005575|GO:0046872	NM_001177832	Mm.390595	628709	507.946	2152.03	9.02676	10.1084	524.315	498.057	501.467	2154.49	2124.78	2176.83	9.05076	9.0206	9.00892	10.1295	10.0838	10.1119
A_55_P2075358	4.83599e-07	3.5501e-06	2.00043	up		chr6:078167251-078167310							5956.07	21624.5	12.7739	13.7742	6101.9	5815.12	5951.19	21358	21724.2	21791.3	12.7844	12.7613	12.7759	13.7436	13.7932	13.7857
A_52_P220485	4.84095e-07	3.55251e-06	3.07091	up	NM_144873	chr19:30130768-30130827	Uhrf2	Mus musculus ubiquitin-like, containing PHD and RING finger domains 2 (Uhrf2), mRNA [NM_144873]	GO:0006511|GO:0004842|GO:0016567|GO:0008283|GO:0016874|GO:0005634|GO:0003677|GO:0071158|GO:0030154|GO:0046872|GO:0051865|GO:0042393|GO:0005720|GO:0007049|GO:0008270	NM_144873	Mm.313364	109113	396.213	2370.34	8.63452	10.2532	411.489	378.474	398.675	2339.71	2404.86	2366.44	8.67024	8.5885	8.64482	10.2531	10.2752	10.2312
A_66_P123324	4.85669e-07	3.56157e-06	4.20344	up	U29593	chr6:68469274-68469333		Mus musculus anti-DNA antibody Ig kappa chain mRNA, V-J region, hybridoma 104.72, partial cds. [U29593]			Mm.333119		33.9068	213.859	4.68659	6.75816	33.4392	35.6336	32.6478	214.321	210.766	216.491	4.65153	4.75074	4.65749	6.78103	6.73336	6.76008
A_55_P2090535	4.86125e-07	3.56367e-06	4.31997	up	NM_146153	chr4:125849065-125849006	Thrap3	Mus musculus thyroid hormone receptor associated protein 3 (Thrap3), mRNA [NM_146153]	GO:0051219|GO:0008380|GO:0048026|GO:0006367|GO:0006366|GO:0005634|GO:0043231|GO:0046966|GO:0000166|GO:0030518|GO:0000381|GO:0045944|GO:0004872|GO:0048255|GO:0035145|GO:0003712|GO:0006397|GO:0006355|GO:0001104|GO:0003713|GO:0000956|GO:0005524|GO:0006351|GO:0016592|GO:0045893|GO:0030521	NM_146153	Mm.236211	230753	73.8311	550.468	5.96299	8.07401	72.6512	76.5132	72.3288	547.728	554.095	549.581	5.91676	6.03081	5.94139	8.08701	8.07648	8.05854
A_52_P663413	4.86982e-07	3.56863e-06	4.12856	up	NM_011031	chr11:53945032-53945091	P4ha2	Mus musculus procollagen-proline, 2-oxoglutarate 4-dioxygenase (proline 4-hydroxylase), alpha II polypeptide (P4ha2), transcript variant 2, mRNA [NM_011031]	GO:0005515|GO:0005581|GO:0031418|GO:0005506|GO:0005783|GO:0004656|GO:0051213|GO:0046872|GO:0018401|GO:0016491|GO:0016706|GO:0016705|GO:0016702|GO:0055114	NM_011031	Mm.3705	18452	15.8763	85.0044	3.45036	5.49599	15.3193	16.9554	15.354	82.9609	84.5144	87.538	3.39413	3.50509	3.45185	5.485	5.48125	5.52172
A_55_P2184897	4.88429e-07	3.57414e-06	2.08187	up	NM_133815	chr1:183746733-183746674	Lbr	Mus musculus lamin B receptor (Lbr), mRNA [NM_133815]	GO:0031965|GO:0070087|GO:0005637|GO:0005634|GO:0005635|GO:0016628|GO:0003677|GO:0005739|GO:0016020|GO:0005643|GO:0005652|GO:0016021|GO:0055114	NM_133815	Mm.4538	98386	869.022	3647.22	9.87941	10.9373	883.54	840.742	882.784	3623.31	3636.77	3681.58	9.88373	9.84698	9.90752	10.9428	10.9322	10.9369
A_51_P513959	4.88816e-07	3.57414e-06	2.33618	up	BC003885	chr9:72970555-72970619	Rsl24d1	Mus musculus cDNA sequence BC003885, mRNA (cDNA clone MGC:6735 IMAGE:3590401), complete cds. [BC003885]	GO:0008150|GO:0003674|GO:0042254|GO:0005634|GO:0005575		Mm.379366	225215	738.611	3431.58	9.61234	10.8365	744.302	726.296	745.235	3313.9	3488.77	3492.07	9.60063	9.60972	9.62667	10.7987	10.8617	10.849
A_55_P2094100	4.89046e-07	3.57414e-06	2.77186	up	BC085271	chr1_random:168720-168661	BC085271	Mus musculus cDNA sequence BC085271, mRNA (cDNA clone MGC:103372 IMAGE:30146389), complete cds. [BC085271]				100504508	491.531	2677.75	8.97698	10.4478	490.338	498.052	486.204	2674.32	2685.54	2673.37	8.9525	9.02011	8.95834	10.4663	10.4526	10.4246
A_55_P2076772	4.89155e-07	3.57414e-06	2.52483	up	NM_022310	chr2:34631913-34631972	Hspa5	Mus musculus heat shock protein 5 (Hspa5), transcript variant 2, mRNA [NM_022310]	GO:0005515|GO:0006983|GO:0005783|GO:0005634|GO:0030176|GO:0051787|GO:0005739|GO:0005737|GO:0008180|GO:0000166|GO:0021680|GO:0034663|GO:0051603|GO:0031398|GO:0040019|GO:0071353|GO:0042149|GO:0030512|GO:0031625|GO:0043066|GO:0005793|GO:0009986|GO:0019904|GO:0030496|GO:0005524|GO:0005790|GO:0021589|GO:0043022|GO:0005788|GO:0051082|GO:0006987	NM_022310	Mm.330160	14828	20507.7	69165.8	14.7376	16.0738	21296.4	19860.6	20366	70061.8	68923.2	68512.3	14.7682	14.7143	14.7305	16.0419	16.0886	16.091
A_66_P140613	4.9307e-07	3.58956e-06	2.43788	up		chr18:028346749-028346690							676.18	3254.59	9.46949	10.7551	703.69	661.681	663.168	3170.27	3302.21	3291.29	9.50484	9.45795	9.44567	10.733	10.7752	10.7571
A_55_P2361652	4.93567e-07	3.59194e-06	3.79796	up	XR_168559	chr17:51896681-51896622	LOC101056045	PREDICTED: Mus musculus uncharacterized LOC101056045 (LOC101056045), misc_RNA [XR_168559]		XR_168559	Mm.491527	101056045	4442.98	29088.5	12.3617	14.2869	4351.24	4456.63	4521.08	29195.3	28671.7	29398.4	12.3052	12.3899	12.3899	14.2726	14.2685	14.3195
A_52_P311042	4.94966e-07	3.59962e-06	3.78393	up	X67195	chr12:115526523-115526464		M.musculus mRNA (2D12) for autoantibody (V-region heavy chain). [X67195]			Mm.303767		38.0648	219.391	4.8754	6.79529	39.7473	37.8978	36.5492	215.412	223.978	218.783	4.93395	4.85252	4.83973	6.78703	6.82213	6.7767
A_51_P167876	4.98939e-07	3.61851e-06	7.40912	up	NM_011638	chr16:32624877-32625093	Tfrc	Mus musculus transferrin receptor (Tfrc), mRNA [NM_011638]	GO:0005515|GO:0003725|GO:0048471|GO:0005886|GO:0051087|GO:0042802|GO:0006879|GO:0005739|GO:0004998|GO:0045780|GO:0006508|GO:0070062|GO:0009986|GO:0030316|GO:0005576|GO:0006898|GO:0006897|GO:0005905|GO:0016020|GO:0005381|GO:0016023|GO:0030544|GO:0008233|GO:0016021|GO:0055037|GO:0055038|GO:0009897|GO:0005768|GO:0034755	NM_011638	Mm.28683	22042	10.6739	108.125	2.94229	5.83159	11.123	11.5099	9.3887	104.695	104.568	115.113	2.97472	2.97004	2.88211	5.80777	5.77961	5.90739
A_55_P1984003	5.0331e-07	3.64017e-06	3.11626	up	NM_134095	chr15:81830010-81829951	Desi1	Mus musculus desumoylating isopeptidase 1 (Desi1), mRNA [NM_134095]	GO:0005515|GO:0008150|GO:0005737|GO:0016787|GO:0006508|GO:0008233|GO:0005634|GO:0005575|GO:0042802	NM_134095	Mm.474453	28075	36.5876	170.231	4.81338	6.4532	36.3808	38.2728	35.1091	166.41	170.937	173.346	4.79278	4.8683	4.77906	6.44769	6.45334	6.45856
A_51_P295625	5.06474e-07	3.65109e-06	2.08556	up	NM_007479	chr14:27475919-27475978	Arf4	Mus musculus ADP-ribosylation factor 4 (Arf4), mRNA [NM_007479]	GO:0005622|GO:0005515|GO:0005737|GO:0005794|GO:0007173|GO:0005886|GO:0000166|GO:0007264|GO:0006810|GO:0016192|GO:0015031|GO:0005525	NM_007479	Mm.297768	11843	2435.35	9953.72	11.4738	12.5342	2423.09	2448.34	2434.63	9922.35	9982.77	9956.03	11.4433	11.5039	11.4743	12.5351	12.5417	12.5259
A_55_P1989976	5.07689e-07	3.65801e-06	2.69603	up	NM_008534	chr1:173523614-173523555	Ly9	Mus musculus lymphocyte antigen 9 (Ly9), transcript variant 1, mRNA [NM_008534]	GO:0016020|GO:0004872|GO:0016021|GO:0007155	NM_008534	Mm.560	17085	485.642	2590.34	8.95696	10.3878	482.296	491.71	482.919	2538.25	2605.31	2627.45	8.92245	9.00069	8.94774	10.3717	10.395	10.3966
A_51_P118223	5.10661e-07	3.66936e-06	2.67426	up	NR_002928	chr15:8043015-8042956	Gm1943	Mus musculus predicted gene 1943 (Gm1943), non-coding RNA [NR_002928]		NR_002928	Mm.390083	384864	94.708	451.971	6.37364	7.79278	95.6047	96.1577	92.3616	439.914	457.015	458.984	6.36845	6.41507	6.33742	7.77551	7.80506	7.79777
A_51_P162176	5.15485e-07	3.69141e-06	2.32247	up	NM_013718	chr4:125952749-125952808	Trappc3	Mus musculus trafficking protein particle complex 3 (Trappc3), mRNA [NM_013718]	GO:0006888|GO:0005515|GO:0005737|GO:0005794|GO:0000139|GO:0030008|GO:0005783|GO:0006810|GO:0016192|GO:0005829	NM_013718	Mm.8392	27096	612.835	2800.89	9.31392	10.5296	631.751	606.892	599.863	2799.05	2813.5	2790.12	9.33314	9.32977	9.27885	10.5421	10.5393	10.5073
A_55_P2033680	5.17051e-07	3.69759e-06	2.22349	up		chr1:017385601-017385660							178.652	762.591	7.39676	8.54958	182.443	174.091	179.421	770.036	755.175	762.562	7.40863	7.37411	7.40754	8.5819	8.53166	8.53518
A_55_P2028758	5.18236e-07	3.70342e-06	2.03533	up	NM_177663	chr3:87743553-87743612	Isg20l2	Mus musculus interferon stimulated exonuclease gene 20-like 2 (Isg20l2), mRNA [NM_177663]	GO:0008150|GO:0003674|GO:0004527|GO:0004518|GO:0016787|GO:0042254|GO:0005634|GO:0003676|GO:0043231	NM_177663	Mm.45744	229504	133.913	510.581	6.94203	7.9673	135.057	131.943	134.739	493.63	518.911	519.201	6.93666	6.92725	6.96218	7.93976	7.98676	7.97537
A_55_P2138257	5.18747e-07	3.70342e-06	2.5188	up	NM_019912	chr18:35960961-35961020	Ube2d2a	Mus musculus ubiquitin-conjugating enzyme E2D 2A (Ube2d2a), mRNA [NM_019912]	GO:0005515|GO:0000209|GO:0004842|GO:0016567|GO:0016881|GO:0000166|GO:0016874|GO:0005575|GO:0070936|GO:0005524	NM_019912	Mm.180052	56550	3299.76	15884.6	11.9208	13.2536	3432.8	3158.54	3307.95	15972.1	15857.3	15824.4	11.9556	11.8814	11.9254	13.2677	13.2513	13.2416
A_55_P2103837	5.2198e-07	3.72145e-06	2.42136	up	NM_001256005	chr5:105544911-105544852	Gbp4	Mus musculus guanylate binding protein 4 (Gbp4), transcript variant 1, mRNA [NM_001256005]	GO:0050688|GO:0005515|GO:0071346|GO:0042308|GO:0001933|GO:0031397|GO:0005575|GO:0000122|GO:0032687	NM_001256005	Mm.440525	17472	4225.23	19140.3	12.2914	13.5672	4307.35	4261.86	4106.47	19381.8	18984.5	19054.6	12.2911	12.3247	12.2582	13.5883	13.5581	13.5552
A_55_P2045903	5.2252e-07	3.72404e-06	13.2452	up									36.6042	758.239	4.81288	8.54028	37.4366	34.338	38.0379	740.67	757.338	776.71	4.83791	4.69307	4.90767	8.52553	8.53475	8.56057
A_55_P2087240	5.27021e-07	3.7485e-06	2.69352	up	NM_027436	chr14:61452871-61452930	Mipep	Mus musculus mitochondrial intermediate peptidase (Mipep), transcript variant 1, mRNA [NM_027436]	GO:0005739|GO:0008150|GO:0003674|GO:0016787|GO:0006508|GO:0008233|GO:0004222|GO:0046872|GO:0008237	NM_027436	Mm.274650	70478	114.254	566.332	6.68427	8.11376	119.174	112.03	111.558	558.9	561.737	578.359	6.72988	6.66241	6.66051	8.11313	8.09805	8.1301
A_51_P399905	5.30862e-07	3.7669e-06	8.0535	up	AK030541	chr6:56748809-56748868	Gm10209	Mus musculus adult male pituitary gland cDNA, RIKEN full-length enriched library, clone:5330429D05 product:hypothetical protein, full insert sequence. [AK030541]	GO:0008150|GO:0003674|GO:0005575		Mm.57295	100038736	19.5944	221.471	3.79849	6.80811	20.313	20.3279	18.1424	226.431	210.902	227.078	3.84195	3.82505	3.72847	6.85914	6.73371	6.83147
A_55_P2029136	5.32845e-07	3.7746e-06	3.61551	up	NM_133208	chr11:62538359-62538300	Zfp287	Mus musculus zinc finger protein 287 (Zfp287), mRNA [NM_133208]	GO:0005622|GO:0042035|GO:0006355|GO:0003700|GO:0005634|GO:0045893|GO:0003676|GO:0003677|GO:0046872|GO:0006351	NM_133208	Mm.339982	170740	39.4188	218.191	4.93181	6.78601	39.7294	41.0938	37.4331	214.931	216.069	223.574	4.93238	4.98361	4.87943	6.78378	6.76816	6.80607
A_66_P139675	5.3584e-07	3.78944e-06	4.94229	up	M11858	chr6:41507840-41507781		Mouse T-cell receptor active beta-chain V-region (V14-D-J2.3) mRNA. [M11858]			Mm.333027		189.068	1745.31	7.48929	9.79447	187.707	196.244	183.254	1747.2	1741.29	1747.46	7.4566	7.56602	7.44525	9.81375	9.79131	9.77835
A_52_P151853	5.38517e-07	3.80326e-06	2.01534	up	NM_001025262	chr3:8947530-8944703	Tpd52	Mus musculus tumor protein D52 (Tpd52), transcript variant 2, mRNA [NM_001025262]	GO:0005515|GO:0048471|GO:0005737|GO:0046982|GO:0005783|GO:0005509|GO:0042803	NM_001025262	Mm.371590	21985	584.534	2362.09	9.23878	10.2498	602.205	566.492	584.904	2348.05	2335.38	2402.84	9.26056	9.21087	9.2449	10.2594	10.2307	10.2594
A_51_P291501	5.38763e-07	3.80372e-06	4.76641	up	NM_001081062	chr13:113780810-113780869	Ccno	Mus musculus cyclin O (Ccno), mRNA [NM_001081062]	GO:0004844|GO:0007049|GO:0019901|GO:0006284|GO:0051726|GO:0005654|GO:0005634|GO:0000079|GO:0051301	NM_001081062	Mm.25457	218630	21.355	141.517	3.93853	6.19143	21.2816	21.1182	21.665	140.604	140.998	142.949	3.91919	3.88377	4.01263	6.20481	6.18366	6.18583
A_52_P654618	5.39615e-07	3.80625e-06	3.59175	up	NM_001005223	chr11:84725110-84725051	Znhit3	Mus musculus zinc finger, HIT type 3 (Znhit3), mRNA [NM_001005223]	GO:0008150|GO:0003674|GO:0005575|GO:0046872	NM_001005223	Mm.379733	448850	136.89	916.917	6.97975	8.82444	141.3	138.538	130.833	909.931	905.771	935.048	7.01154	7.00861	6.9191	8.8318	8.80454	8.83696
A_55_P2017389	5.40192e-07	3.80625e-06	2.60581	up		chrX:086001227-086001168							162.254	802.754	7.24066	8.62239	165.133	156.344	165.284	782.218	809.133	816.912	7.2501	7.19895	7.27293	8.6029	8.6317	8.63258
A_55_P2025937	5.40389e-07	3.80625e-06	2.43878	up		chr19:11644021-11644080		predicted pseudogene 10212 [Source:MGI Symbol;Acc:MGI:3641904] [ENSMUST00000087884]					1578.33	7538.04	10.8016	12.0878	1643.15	1532.4	1559.42	7594.39	7476.08	7543.66	10.8404	10.7819	10.7826	12.1097	12.0748	12.0789
A_55_P1981269	5.41789e-07	3.81355e-06	2.72406	up	AF012164	chr14:53346535-53346592		T cell receptor alpha variable 6D-3 [Source:MGI Symbol;Acc:MGI:3650097] [ENSMUST00000181483]			Mm.390680		207.692	1086.07	7.62835	9.07411	216.881	201.091	205.105	1066.92	1077.17	1114.13	7.67268	7.60159	7.61078	9.06457	9.06091	9.09685
A_66_P126320	5.42057e-07	3.81417e-06	2.97309	up	NM_023331	chr7:85925444-85925385	Mrpl46	Mus musculus mitochondrial ribosomal protein L46 (Mrpl46), mRNA [NM_023331]	GO:0005739|GO:0008150|GO:0016787|GO:0030529|GO:0005840	NM_023331	Mm.193181	67308	319.836	1831	8.28801	9.85998	332.017	317	310.491	1825.76	1813.99	1853.26	8.32836	8.29648	8.23919	9.87338	9.84594	9.8606
A_55_P2113633	5.43137e-07	3.82049e-06	2.59418	up	NM_025824	chr1:58462055-58462114	Bzw1	Mus musculus basic leucine zipper and W2 domains 1 (Bzw1), mRNA [NM_025824]	GO:0008150|GO:0003674|GO:0006355|GO:0005737|GO:0006351	NM_025824	Mm.21848	66882	1650.82	8338.91	10.8749	12.2502	1670.49	1667.05	1614.92	8288.9	8253.39	8474.45	10.8659	10.918	10.8408	12.2497	12.2379	12.2629
A_55_P2065513	5.50405e-07	3.85756e-06	2.56786	up	NM_007897	chr11:44818438-44818497	Ebf1	Mus musculus early B cell factor 1 (Ebf1), mRNA [NM_007897]	GO:0005515|GO:0006355|GO:0003700|GO:0046983|GO:0070742|GO:0007275|GO:0005634|GO:0045893|GO:0003677|GO:0046872|GO:0006351	NM_007897	Mm.439662	13591	762.188	3848.27	9.66286	11.0234	792.728	731.935	761.901	3810.48	3834.62	3899.73	9.70258	9.622	9.664	11.0267	11.0146	11.0289
A_55_P2147831	5.51929e-07	3.86553e-06	2.33687	up	NM_174990	chr6:48641817-48641876	Gimap4	Mus musculus GTPase, IMAP family member 4 (Gimap4), transcript variant 1, mRNA [NM_174990]	GO:0005737|GO:0000166|GO:0005634|GO:0005525|GO:0005829	NM_174990	Mm.333048	107526	20603.4	65266.3	14.7428	15.9673	21024.9	20548.9	20236.3	67243.5	64104.2	64451.2	14.7442	14.7743	14.7098	15.9867	15.9512	15.9642
A_51_P186899	5.52134e-07	3.86567e-06	3.85593	up	NM_053207	chr8:127432499-127432487	Egln1	Mus musculus EGL nine homolog 1 (C. elegans) (Egln1), mRNA [NM_053207]	GO:0031545|GO:0031543|GO:0060711|GO:0071731|GO:0005634|GO:0051213|GO:0043433|GO:0046872|GO:0005829|GO:0005737|GO:0055008|GO:0001666|GO:0031418|GO:0005506|GO:0060412|GO:0051344|GO:0045765|GO:0060347|GO:0018401|GO:0016706|GO:0016491|GO:0016705|GO:0019899|GO:0030821|GO:0032364|GO:0055114	NM_053207	Mm.140619	112405	46.7924	284.753	5.20312	7.1502	46.0041	47.3255	47.0475	290.202	286.154	277.903	5.16332	5.21026	5.23579	7.19369	7.15462	7.1023
A_52_P609024	5.55231e-07	3.88053e-06	2.78332	up	NM_001109747	chr10:29918343-29918284	Cenpw	Mus musculus centromere protein W (Cenpw), mRNA [NM_001109747]	GO:0051276|GO:0046982|GO:0005694|GO:0005634|GO:0003677|GO:0003674|GO:0007049|GO:0007067|GO:0051382|GO:0007059|GO:0000776|GO:0000278|GO:0000775|GO:0051301	NM_001109747	Mm.251779	66311	288.903	1523.23	8.12719	9.604	289.994	293.701	283.014	1486.99	1543.92	1538.77	8.11222	8.17272	8.09663	9.58433	9.62315	9.60451
A_55_P2178486	5.55363e-07	3.88053e-06	2.55579	up	NM_001283028	chr13:51244770-51244829	Spin1	Mus musculus spindlin 1 (Spin1), transcript variant 3, mRNA [NM_001283028]	GO:0007049|GO:0005737|GO:0007276|GO:0005819|GO:0007275|GO:0005634|GO:0035064|GO:0007143|GO:0005856|GO:0003677	NM_001283028	Mm.188432	20729	122.127	578.101	6.79275	8.14652	122.918	125.584	117.877	570.491	582.76	581.053	6.78545	6.83565	6.75715	8.14714	8.15587	8.13654
A_52_P176160	5.55664e-07	3.88102e-06	3.6443	up	NM_016661	chr2:154891380-154891321	Ahcy	Mus musculus S-adenosylhomocysteine hydrolase (Ahcy), mRNA [NM_016661]	GO:0043005|GO:0002439|GO:0005507|GO:0007584|GO:0005634|GO:0019510|GO:0043621|GO:0005829|GO:0042802|GO:0004013|GO:0042745|GO:0051287|GO:0071268|GO:0030554	NM_016661	Mm.371964	269378	60.4453	365.071	5.62975	7.49539	60.0131	59.7062	61.6166	355.569	376.575	363.068	5.59796	5.61156	5.67973	7.47618	7.53637	7.47362
A_55_P2042813	5.60449e-07	3.90234e-06	2.44088	up	NM_001039647	chr5:105752204-105752145	Gbp11	Mus musculus guanylate binding protein 11 (Gbp11), mRNA [NM_001039647]	GO:0008150|GO:0003674|GO:0005575	NM_001039647	Mm.458435	634650	5522.38	24059.8	12.657	13.9444	5575.51	5329.74	5661.89	23893.3	24040.1	24245.8	12.6444	12.628	12.6985	13.9297	13.9505	13.9528
A_55_P2023542	5.60525e-07	3.90234e-06	4.56511	up	NM_007719	chr11:99005610-99005551	Ccr7	Mus musculus chemokine (C-C motif) receptor 7 (Ccr7), mRNA [NM_007719]	GO:0005515|GO:0002885|GO:0071731|GO:0051491|GO:2000412|GO:0002518|GO:2000510|GO:2000147|GO:0048535|GO:0005622|GO:0032649|GO:0006935|GO:0034695|GO:0004950|GO:0032496|GO:2000525|GO:2000526|GO:0070098|GO:0032760|GO:0004930|GO:0038121|GO:2000522|GO:0007186|GO:0032320|GO:0090023|GO:0010759|GO:0016493|GO:0050706|GO:0035758|GO:0009897|GO:0038117|GO:0035757|GO:0030036|GO:0005886|GO:0097022|GO:0032735|GO:…	NM_007719	Mm.2932	12775	14252.1	77046.5	14.0993	16.29	14289	14769.1	13698.1	78905.7	76487.9	75746	14.0804	14.1729	14.0447	16.2904	16.2956	16.2841
A_55_P1969775	5.62564e-07	3.90877e-06	2.31024	up	AK084507	chr14:9003664-9003605	Pdhb	Mus musculus 13 days embryo heart cDNA, RIKEN full-length enriched library, clone:D330010A17 product:pyruvate dehydrogenase (lipoamide) beta, full insert sequence. [AK084507]	GO:0005739|GO:0006099|GO:0005975|GO:0008152|GO:0016491|GO:0006006|GO:0004738|GO:0004739|GO:0003824|GO:0045254|GO:0055114|GO:0006086			68263	223.232	991.593	7.73467	8.94272	231.465	215.271	222.96	971.668	990.709	1012.4	7.76807	7.70042	7.73553	8.92949	8.94119	8.95746
A_55_P2021721	5.64683e-07	3.9209e-06	3.36701	up		chr19:026605381-026605440							1143.37	7425.29	10.3103	12.0618	1160.47	1113.4	1156.26	7142.35	7430.79	7702.72	10.3077	10.2972	10.3261	12.0094	12.0645	12.1115
A_55_P2149931	5.65985e-07	3.92346e-06	2.31462	up	NM_178407	chr5:62995568-62995509	Arap2	Mus musculus ArfGAP with RhoGAP domain, ankyrin repeat and PH domain 2 (Arap2), mRNA [NM_178407]	GO:0005622|GO:0008060|GO:0007165|GO:0005737|GO:0032312|GO:0005547|GO:0008270|GO:0046872|GO:0005096	NM_178407	Mm.244403	212285	433.181	1986.82	8.77479	9.98556	442.438	417.557	439.548	1933.09	1996.32	2031.07	8.78525	8.74077	8.79834	9.96236	9.99103	10.0033
A_55_P2187067	5.67817e-07	3.92987e-06	2.22129	up	U30243	chr6:68071630-68071689		Mus musculus anti-DNA antibody Ig kappa chain mRNA, V-J region, hybridoma 73.4, partial cds. [U30243]			Mm.304143		585.14	2598.5	9.24149	10.3929	609.981	569.282	576.157	2584.76	2600.04	2610.69	9.28071	9.22272	9.22105	10.4025	10.3891	10.387
A_55_P2114903	5.67844e-07	3.92987e-06	4.43527	up	X83008	chr14:54241726-54241783		T cell receptor alpha variable 12-3 [Source:MGI Symbol;Acc:MGI:3648633] [ENSMUST00000103657]			Mm.425870		114.615	926.59	6.69181	8.84083	116.752	109.781	117.312	900.375	941.851	937.546	6.70063	6.62717	6.74762	8.81664	8.86485	8.841
A_55_P2126925	5.70877e-07	3.94905e-06	2.0514	up	NM_001145924	chr4:48574714-48574773	Msantd3	Mus musculus Myb/SANT-like DNA-binding domain containing 3 (Msantd3), transcript variant 1, mRNA [NM_001145924]	GO:0008150|GO:0005575|GO:0042802	NM_001145924	Mm.140749	66665	207.969	828.483	7.63197	8.66858	214.93	205.314	203.663	821.595	830.465	833.389	7.66035	7.6366	7.59896	8.67549	8.66628	8.66398
A_55_P1977451	5.71928e-07	3.95224e-06	2.6264	up	AY351698	chr6:68966627-68966568		Mus musculus anti-human uPAR immunoglobulin light chain variable region mRNA, partial cds. [AY351698]			Mm.424508		768.72	3948.19	9.67508	11.0682	803.478	748.313	754.369	3941.15	3920.75	3982.68	9.72101	9.65621	9.64803	11.0821	11.0537	11.0687
A_55_P2058152	5.73319e-07	3.95912e-06	2.27348	up	NM_134034	chr11:29109400-29109459	Smek2	Mus musculus SMEK homolog 2, suppressor of mek1 (Dictyostelium) (Smek2), mRNA [NM_134034]	GO:0005515|GO:0030289|GO:0005737|GO:0006470|GO:0045722|GO:0005634|GO:0005856|GO:0019216	NM_134034	Mm.276386	104570	1446.98	6589.72	10.6781	11.863	1438.99	1456.71	1445.25	6508.63	6570.95	6689.57	10.6438	10.709	10.6815	11.8523	11.8563	11.8804
A_55_P2181753	5.73764e-07	3.95912e-06	2.24596	up	NM_001122683	chr16:31457249-31457308	Bdh1	Mus musculus 3-hydroxybutyrate dehydrogenase, type 1 (Bdh1), transcript variant 2, mRNA [NM_001122683]	GO:0005739|GO:0005543|GO:0008152|GO:0016491|GO:0005743|GO:0003858|GO:0005634|GO:0003824|GO:0055114	NM_001122683	Mm.293470	71911	200.441	870.863	7.57652	8.74386	206.949	198.351	196.022	864.324	861.295	886.969	7.6029	7.58435	7.54233	8.75142	8.72397	8.75618
A_52_P162184	5.82272e-07	4.006e-06	2.20548	up	NM_018875	chrX:98410892-98410833	Snx12	Mus musculus sorting nexin 12 (Snx12), transcript variant 3, mRNA [NM_018875]	GO:0008150|GO:0003674|GO:0007154|GO:0016020|GO:0006810|GO:0005575|GO:0035091|GO:0015031|GO:0008289	NM_018875	Mm.206949	55988	187.205	796.689	7.4701	8.61119	194.818	182.949	183.848	782.615	803.921	803.532	7.50894	7.45225	7.4491	8.60376	8.62144	8.60837
A_65_P09031	5.83217e-07	4.00749e-06	2.76676	up	NM_178626	chr11:54533226-54533167	Cdc42se2	Mus musculus CDC42 small effector 2 (Cdc42se2), mRNA [NM_178626]	GO:0006909|GO:0005737|GO:0016020|GO:0005886|GO:0005198|GO:0008360|GO:0005634|GO:0042995|GO:0009966|GO:0005856|GO:0043231	NM_178626	Mm.29476	72729	463.141	2523.92	8.87954	10.3477	474.767	443.372	471.283	2448.54	2548.96	2574.24	8.89101	8.83879	8.90882	10.3178	10.3582	10.3673
A_52_P89683	5.84434e-07	4.01038e-06	2.9677	up		chrX:010258406-010258464							587.907	3387.11	9.24594	10.8153	601.016	559.292	603.414	3358.47	3370.09	3432.78	9.25719	9.19379	9.28684	10.8186	10.8073	10.82
A_55_P2117623	5.85106e-07	4.01368e-06	4.60567	up	NM_028075	chr15:82054675-82054616	Tnfrsf13c	Mus musculus tumor necrosis factor receptor superfamily, member 13c (Tnfrsf13c), mRNA [NM_028075]	GO:0001782|GO:0016020|GO:0030890|GO:0045078|GO:0031296|GO:0050776|GO:0042102|GO:0031295|GO:0002636|GO:0016021|GO:0009897	NM_028075	Mm.240047	72049	61.0125	470.717	5.64413	7.84754	63.6257	61.9095	57.5023	463.714	470.794	477.642	5.69639	5.66769	5.56831	7.84408	7.84408	7.85446
A_55_P2021854	5.86523e-07	4.01916e-06	2.10466	up	AK011488	chr9:35373887-35373946		Mus musculus 10 days embryo whole body cDNA, RIKEN full-length enriched library, clone:2610020J05 product:similar to PSEUDOURIDINE SYNTHASE 3 [Mus musculus], full insert sequence. [AK011488]			Mm.252879		320.979	1311.08	8.29424	9.36782	320.547	317.447	324.942	1281.4	1309.33	1342.52	8.26565	8.29818	8.31888	9.35004	9.36554	9.38789
A_55_P2059090	5.86669e-07	4.01916e-06	2.54049	up	NM_145968	chr17:8127700-8127759	Tagap	Mus musculus T cell activation Rho GTPase activating protein (Tagap), mRNA [NM_145968]	GO:0005622|GO:0005085|GO:0007165|GO:0003674	NM_145968	Mm.119680	72536	5614.76	25070	12.6792	14.0243	5586.53	5530.72	5727.04	24858.2	25166.5	25185.3	12.6459	12.6749	12.7166	14.0003	14.0383	14.0342
A_55_P2006255	5.87462e-07	4.02186e-06	5.39591	up	NM_001009935	chr3:96364206-96364265	Txnip	Mus musculus thioredoxin interacting protein (Txnip), transcript variant 1, mRNA [NM_001009935]	GO:0004857|GO:0005515|GO:0006355|GO:0043065|GO:0005623|GO:0005634|GO:0000122|GO:0006606|GO:0043086|GO:0006351|GO:0005622|GO:0005758|GO:0005737|GO:0007049|GO:0030216|GO:0042127|GO:0071228|GO:0051782|GO:0048008|GO:0006979|GO:0031625	NM_001009935	Mm.410189	56338	3803.05	33372.3	12.1416	14.5734	3782.35	3888.89	3737.91	32590.3	33570.6	33956.1	12.107	12.1985	12.1193	14.5101	14.5961	14.6141
A_55_P2082914	5.90972e-07	4.03849e-06	4.70648	up	NM_134037	chr11:100365577-100365518	Acly	Mus musculus ATP citrate lyase (Acly), transcript variant 2, mRNA [NM_134037]	GO:0006629|GO:0005515|GO:0048037|GO:0008610|GO:0044262|GO:0005886|GO:0046912|GO:0003878|GO:0005634|GO:0003824|GO:0006085|GO:0005524|GO:0006084|GO:0046872|GO:0005622|GO:0005739|GO:0006101|GO:0005737|GO:0000166|GO:0008152|GO:0006633|GO:0004775|GO:0016740	NM_134037	Mm.282039	104112	28.3234	197.13	4.40763	6.64227	29.5554	28.6895	26.7252	196.085	190.671	204.635	4.46527	4.39307	4.36454	6.65632	6.59209	6.67841
A_51_P285916	5.95925e-07	4.06536e-06	6.07484	up	NM_019688	chr2:72080822-72091028	Rapgef4	Mus musculus Rap guanine nucleotide exchange factor (GEF) 4 (Rapgef4), transcript variant 2, mRNA [NM_019688]	GO:0005515|GO:0030424|GO:0005886|GO:0008603|GO:0007264|GO:0006887|GO:0032403|GO:0030425|GO:0005829|GO:0014911|GO:0035556|GO:0005622|GO:0005085|GO:0016323|GO:0005737|GO:0016324|GO:0030552|GO:0043197|GO:0000166|GO:0017156|GO:0017157|GO:0017016|GO:0005088|GO:0051056|GO:0005952|GO:0060076|GO:0043234|GO:0001917|GO:0007165|GO:0050790|GO:0016020|GO:0050805|GO:0019933|GO:0050773|GO:0001932|GO:0030073|GO:…	NM_019688	Mm.196153	56508	66.2006	680.829	5.7824	8.38525	66.5677	63.5531	68.4808	654.353	688.198	699.936	5.77816	5.71259	5.85645	8.34575	8.39758	8.41241
A_52_P488305	5.9654e-07	4.06824e-06	3.31781	up	NM_023668	chr11:68646905-68643559	Ndel1	Mus musculus nuclear distribution gene E-like homolog 1 (A. nidulans) (Ndel1), mRNA [NM_023668]	GO:0005515|GO:0008017|GO:0030424|GO:0008090|GO:0007100|GO:0001833|GO:0045773|GO:0005635|GO:0032403|GO:0031175|GO:0030154|GO:0051642|GO:0005737|GO:0007059|GO:0048680|GO:0047496|GO:0021799|GO:0043203|GO:0006810|GO:0005856|GO:0060070|GO:0031252|GO:0060053|GO:0060052|GO:0005871|GO:0005813|GO:0005815|GO:0043014|GO:0005694|GO:0005875|GO:0021955|GO:0005874|GO:0048487|GO:0000226|GO:0007275|GO:0032864|GO:…	NM_023668	Mm.31979	83431	174.101	1095.88	7.3569	9.08713	171.593	171.736	178.975	1103.03	1077.95	1106.67	7.31304	7.35293	7.40473	9.11583	9.06262	9.08295
A_55_P2021029	5.99451e-07	4.08183e-06	2.45844	up	NM_198634	chr19:5891206-5891147	Tigd3	Mus musculus tigger transposable element derived 3 (Tigd3), mRNA [NM_198634]	GO:0008150|GO:0003674|GO:0005634|GO:0005575|GO:0003676|GO:0003677	NM_198634	Mm.329642	332359	34.563	123.772	4.72094	6.01868	34.6632	35.1121	33.9136	120.869	120.767	129.678	4.7138	4.72786	4.72114	6.01147	5.98342	6.06115
A_55_P2061333	6.00075e-07	4.08183e-06	2.51144	up		chr14:061943534-061943475							1812.2	8861.75	11.0186	12.3471	1865.44	1734.94	1836.21	8835.99	8930.62	8818.65	11.0391	10.9758	11.0409	12.3496	12.3632	12.3286
A_55_P2051229	6.00086e-07	4.08183e-06	2.45797	up	NM_019925	chr12:114089147-114089088	Gpr132	Mus musculus G protein-coupled receptor 132 (Gpr132), mRNA [NM_019925]	GO:0007165|GO:0000082|GO:0016020|GO:0007186|GO:0005886|GO:0005887|GO:0004930|GO:0016021|GO:0004871	NM_019925	Mm.20455	56696	13232.6	48187.3	13.9881	15.2855	13779.5	12635.8	13282.4	49329.2	47634.5	47598.2	14.0218	13.945	13.9974	15.2927	15.2862	15.2777
A_55_P2049976	6.01286e-07	4.08338e-06	6.35075	up		chr12:069191971-069192030							28.5606	270.282	4.4152	7.08213	27.9142	28.0904	29.6771	265.736	267.134	277.977	4.37503	4.36334	4.50723	7.07854	7.06479	7.10306
A_51_P265151	6.01817e-07	4.08383e-06	2.11337	up	NM_172751	chr8:15000157-15000216	Arhgef10	Mus musculus Rho guanine nucleotide exchange factor (GEF) 10 (Arhgef10), transcript variant 1, mRNA [NM_172751]	GO:0005085|GO:0051298|GO:0050790|GO:0005813|GO:0035023|GO:0022011|GO:0051496|GO:0033126|GO:0090307|GO:0019894|GO:0005089	NM_172751	Mm.240298	234094	223.839	913.166	7.73941	8.81895	225.408	224.319	221.788	885.707	925.246	928.544	7.72698	7.76628	7.72496	8.79183	8.83626	8.82877
A_51_P480190	6.0191e-07	4.08383e-06	4.32472	up	NM_026293	chr4:34115414-34115355	Spaca1	Mus musculus sperm acrosome associated 1 (Spaca1), mRNA [NM_026293]	GO:0003674|GO:0001675|GO:0016020|GO:0016021|GO:0007283|GO:0002080	NM_026293	Mm.55848	67652	80	605.384	6.1013	8.21391	84.0303	77.5998	78.3698	598.906	618.717	598.53	6.16391	6.05539	6.0846	8.22024	8.24333	8.17815
A_55_P2028904	6.03989e-07	4.09334e-06	3.67703	up	NM_001205242	chr14:54286021-54286080	A430107P09Rik	Mus musculus RIKEN cDNA A430107P09 gene (A430107P09Rik), mRNA [NM_001205242]	GO:0008150|GO:0003674|GO:0005575	NM_001205242	Mm.404412	100568452	172.879	1196.33	7.34192	9.22046	180.853	165.659	172.125	1201.32	1192.06	1195.63	7.39561	7.28695	7.34319	9.24381	9.20919	9.20837
A_55_P2025572	6.04699e-07	4.09334e-06	4.51279	up	NM_001081021	chr7:28749862-28749803	Zfp780b	Mus musculus zinc finger protein 780B (Zfp780b), mRNA [NM_001081021]	GO:0008150|GO:0003674|GO:0005575|GO:0046872	NM_001081021	Mm.389873	338354	7.59553	54.1689	2.6617	4.83572	7.40304	7.96657	7.41698	52.7617	56.6278	53.1171	2.63219	2.64537	2.70754	4.82047	4.89542	4.79126
A_52_P622391	6.05418e-07	4.09426e-06	2.01867	up	NM_009481	chrX:12738630-12738777	Usp9x	Mus musculus ubiquitin specific peptidase 9, X chromosome (Usp9x), mRNA [NM_009481]	GO:0005515|GO:0006511|GO:0016579|GO:0070410|GO:0045177|GO:0030509|GO:0005737|GO:0007049|GO:0007067|GO:0007059|GO:0016787|GO:0006508|GO:0007179|GO:0008233|GO:0004221|GO:0008234|GO:0051301	NM_009481	Mm.242646	22284	472.312	1909.76	8.91296	9.92637	483.938	464.706	468.291	1856.85	1911.72	1960.7	8.92794	8.91183	8.89911	9.89847	9.92663	9.954
A_52_P537466	6.06029e-07	4.09476e-06	2.33385	up	NM_145600	chr8:85291114-85290616	Zfp330	Mus musculus zinc finger protein 330 (Zfp330), mRNA [NM_145600]	GO:0005694|GO:0005730|GO:0030496|GO:0008270|GO:0005634|GO:0046872|GO:0000775	NM_145600	Mm.269248	30932	581.141	2680.45	9.22786	10.4506	607.145	564.445	571.832	2640.19	2681.69	2719.47	9.26995	9.20729	9.20633	10.4409	10.4501	10.4607
A_55_P2133568	6.06555e-07	4.09476e-06	3.39541	up	NR_040721	chr9:88417209-88417150	Snhg5	Mus musculus small nucleolar RNA host gene 5 (Snhg5), long non-coding RNA [NR_040721]	GO:0008150|GO:0003674|GO:0005575	NR_040721	Mm.21798	72655	241.184	1532.31	7.84942	9.61301	249.61	230.747	243.195	1517.97	1571.29	1507.66	7.87266	7.80816	7.86744	9.61682	9.65204	9.57017
A_55_P2111289	6.08059e-07	4.10157e-06	4.30821	up	AK014157	chr7:99889578-99889519		RIKEN cDNA 4632427E13 gene [Source:MGI Symbol;Acc:MGI:1915436] [ENSMUST00000098305]			Mm.473620		61.4845	443.079	5.65779	7.76488	64.4846	59.2692	60.6997	430.492	445.439	453.306	5.72126	5.59674	5.65538	7.74441	7.76807	7.78216
A_55_P2116953	6.09622e-07	4.10168e-06	2.22581	up	NM_178716	chr13:99612201-99612142	Tnpo1	Mus musculus transportin 1 (Tnpo1), transcript variant 1, mRNA [NM_178716]	GO:0005515|GO:0005737|GO:0008536|GO:0006810|GO:0005634|GO:0015031|GO:0006886	NM_178716	Mm.173286	238799	41.5438	139.506	5.0163	6.17063	42.2268	41.637	40.7676	138.64	136.023	143.855	5.02996	5.00393	5.015	6.18198	6.1332	6.1967
A_51_P149714	6.11343e-07	4.1066e-06	2.21584	up	NM_026835	chr19:11661485-11661426	Ms4a6d	Mus musculus membrane-spanning 4-domains, subfamily A, member 6D (Ms4a6d), mRNA [NM_026835]	GO:0008150|GO:0003674|GO:0016020|GO:0016021|GO:0005575	NM_026835	Mm.290390	68774	2720.47	11752.2	11.6393	12.7872	2812.34	2637.49	2711.58	11512.5	11833.6	11910.7	11.6683	11.6123	11.6374	12.762	12.7995	12.8001
A_55_P2041868	6.11867e-07	4.10881e-06	2.79392	up	NM_001081211	chr4:132136722-132136781	Ptafr	Mus musculus platelet-activating factor receptor (Ptafr), mRNA [NM_001081211]	GO:0005886|GO:0004930|GO:0048015|GO:0001875|GO:0005634|GO:0001816|GO:0043231|GO:0001530|GO:0007165|GO:0002221|GO:0032959|GO:0004992|GO:0005543|GO:0006954|GO:0016020|GO:0007186|GO:0006935|GO:0032496|GO:0016021|GO:0004871|GO:0031663	NM_001081211	Mm.89389	19204	128.236	664.645	6.86957	8.35186	132.329	125.667	126.712	670.896	653.758	669.282	6.9022	6.83624	6.87028	8.38705	8.32477	8.34376
A_66_P121285	6.13917e-07	4.12126e-06	14.702	up	NM_173396	chr2:156679946-156680005	Tgif2	Mus musculus TGFB-induced factor homeobox 2 (Tgif2), mRNA [NM_173396]	GO:0043565|GO:0006355|GO:0003700|GO:0060041|GO:0045666|GO:0010470|GO:0038092|GO:0005634|GO:0005575|GO:0000122|GO:0003677|GO:0006351	NM_173396	Mm.315625	228839	10.5194	221.316	2.92846	6.80641	10.7546	12.2124	8.59128	224.252	215.791	223.905	2.93647	3.03752	2.8114	6.84563	6.7653	6.80829
A_55_P2038519	6.17108e-07	4.13476e-06	8.21888	up		chr5:088857239-088857298							15.092	165.785	3.37572	6.41466	15.8684	14.5365	14.8712	159.232	167.215	170.908	3.44812	3.27653	3.4025	6.37892	6.42639	6.43867
A_55_P2120089	6.19373e-07	4.14356e-06	2.80316	up	NM_001199141	chr13:9685408-9685349	Zmynd11	Mus musculus zinc finger, MYND domain containing 11 (Zmynd11), transcript variant 3, mRNA [NM_001199141]	GO:2001237|GO:0006355|GO:0005737|GO:0046329|GO:0005694|GO:0008270|GO:0005634|GO:0003677|GO:0046872|GO:0006351|GO:0043124|GO:0016568	NM_001199141	Mm.397307	66505	126.393	658.038	6.84775	8.33481	126.28	124.762	128.137	631.903	667.012	675.2	6.8337	6.8266	6.88296	8.29498	8.35338	8.35606
A_52_P320761	6.2033e-07	4.14715e-06	2.55627	up	JX120184	chr12:116067677-116067618		Mus musculus strain C57BL/6 clone 30 immunoglobulin heavy chain mRNA, partial cds. [JX120184]			Mm.491823		82.0624	366.507	6.14517	7.49921	83.7855	81.0998	81.302	353.159	364.337	382.024	6.15926	6.1332	6.14304	7.46618	7.4878	7.54363
A_55_P1988070	6.21021e-07	4.1504e-06	2.28224	up	NM_026007	chr19:9044358-9044417	Eef1g	Mus musculus eukaryotic translation elongation factor 1 gamma (Eef1g), mRNA [NM_026007]	GO:0005853|GO:0003746|GO:0006412|GO:0006414	NM_026007	Mm.379129	67160	2893.57	12951.9	11.7337	12.9242	2933.5	2914.72	2832.49	13113.3	12931.6	12810.7	11.7296	11.7638	11.7077	12.9487	12.9227	12.9011
A_55_P1954569	6.21677e-07	4.1531e-06	9.79999	up	AK031297	chr13_random:114617-114558	Hmgcs1	Mus musculus 13 days embryo male testis cDNA, RIKEN full-length enriched library, clone:6030403N11 product:pre B-cell leukemia transcription factor 1, full insert sequence. [AK031297]	GO:0006629|GO:0006695|GO:0006694|GO:0043177|GO:0004421|GO:0005886|GO:0010243|GO:0005634|GO:0008299|GO:0003824|GO:0042803|GO:0005829|GO:0005737|GO:0008144|GO:0008152|GO:0016126|GO:0016853|GO:0016740|GO:0008202|GO:0008203		Mm.61526	208715	6.90254	112.77	2.60044	5.89322	6.62293	8.71232	5.37236	110.896	113.151	114.264	2.56091	2.71664	2.52376	5.88986	5.89464	5.89515
A_52_P641716	6.27157e-07	4.18293e-06	4.73171	up	NM_178666	chr10:28502071-28502130	Themis	Mus musculus thymocyte selection associated (Themis), mRNA [NM_178666]	GO:0005515|GO:0050852|GO:0005737|GO:0043383|GO:0008180|GO:0007275|GO:0005634|GO:0043368	NM_178666	Mm.123021	210757	90.6342	759.842	6.30231	8.54468	94.0178	92.2288	85.656	747.407	764.979	767.141	6.33918	6.34574	6.22202	8.53793	8.54945	8.54664
A_51_P481644	6.2938e-07	4.19511e-06	2.1383	up	NM_145442	chr12:57429515-57429456	Mbip	Mus musculus MAP3K12 binding inhibitory protein 1 (Mbip), mRNA [NM_145442]	GO:0005515|GO:0005737|GO:0043966|GO:0005730|GO:0005671|GO:0005634|GO:0042802	NM_145442	Mm.25656	217588	1528.73	6569.24	10.7597	11.8562	1532.26	1544.8	1509.14	6468.22	6594.31	6645.21	10.7394	10.7963	10.7435	11.8417	11.8647	11.8622
A_55_P2137049	6.29506e-07	4.19511e-06	2.53605	up	NM_001004174	chr2:122466640-122466699	AA467197	Mus musculus expressed sequence AA467197 (AA467197), mRNA [NM_001004174]	GO:0005739|GO:0008150|GO:0003674|GO:0005634	NM_001004174	Mm.36783	433470	139.053	662.157	7.00377	8.34635	138.136	142.176	136.846	649.195	660.688	676.589	6.97653	7.04998	6.9848	8.33844	8.34095	8.35968
A_52_P139650	6.32457e-07	4.20944e-06	2.60989	up	NM_025581	chr18:74356670-74356611	Ska1	Mus musculus spindle and kinetochore associated complex subunit 1 (Ska1), transcript variant 1, mRNA [NM_025581]	GO:0008017|GO:0005813|GO:0031110|GO:0005694|GO:0005874|GO:0000940|GO:0005737|GO:0007049|GO:0007067|GO:0007059|GO:0015630|GO:0000776|GO:0005876|GO:0005856|GO:0000775|GO:0051301	NM_025581	Mm.283406	66468	59.9688	254.774	5.614	6.99799	61.3965	58.4648	60.0451	255.102	252.691	256.529	5.63782	5.56917	5.635	7.01977	6.98541	6.98878
A_55_P1993054	6.34321e-07	4.21286e-06	3.27719	up	NM_133948	chr4:83109585-83109526	Psip1	Mus musculus PC4 and SFRS1 interacting protein 1 (Psip1), mRNA [NM_133948]	GO:0001105|GO:0006355|GO:0006366|GO:0009408|GO:0005730|GO:0035327|GO:0005634|GO:0003677|GO:0006351|GO:0000395|GO:0005720|GO:0097100|GO:0034399|GO:0045944|GO:0003682|GO:0005654|GO:0033613|GO:0006979	NM_133948	Mm.105331	101739	631.175	3953.43	9.35795	11.0704	625.673	645.688	622.164	3898.2	3982.97	3979.12	9.31961	9.41829	9.33594	11.0644	11.0796	11.0672
A_55_P2073845	6.38301e-07	4.2336e-06	2.256	up	NM_029017	chr3:32633096-32633037	Mrpl47	Mus musculus mitochondrial ribosomal protein L47 (Mrpl47), mRNA [NM_029017]	GO:0005739|GO:0008150|GO:0003674|GO:0003735|GO:0030529|GO:0005761|GO:0005840|GO:0006412	NM_029017	Mm.288960	74600	97.4903	393.019	6.42177	7.59554	96.677	96.4774	99.3166	385.554	392.824	400.678	6.38568	6.42245	6.45719	7.59111	7.59026	7.60526
A_51_P511734	6.39647e-07	4.23891e-06	2.65318	up	NM_175246	chr4:124750597-124750656	Snip1	Mus musculus Smad nuclear interacting protein 1 (Snip1), mRNA [NM_175246]	GO:0005515|GO:0006355|GO:0005737|GO:0035196|GO:0007249|GO:0005634|GO:0031047	NM_175246	Mm.22548	76793	360.07	1867.56	8.48347	9.89119	364.997	362.284	352.928	1879.36	1842.33	1880.99	8.47778	8.52017	8.45246	9.92051	9.86521	9.88784
A_52_P456279	6.42469e-07	4.24919e-06	2.06451	up	NM_009840	chr16:87486129-87485981	Cct8	Mus musculus chaperonin containing Tcp1, subunit 8 (theta) (Cct8), mRNA [NM_009840]	GO:0005813|GO:0016235|GO:0005832|GO:0005874|GO:0007339|GO:0005524|GO:0044297|GO:0005829|GO:0003674|GO:0005737|GO:0000166|GO:0006457|GO:0002199|GO:0051082|GO:0045111|GO:0005856|GO:0044267	NM_009840	Mm.328673	12469	2964.58	11953.8	11.7688	12.8146	2996.94	2964.79	2932	11688.4	12061.5	12111.5	11.7615	11.7911	11.7538	12.7844	12.8314	12.828
[truncated: 1,944 more rows]

## Sheet: Water vs NC_down
C1 vs C2 2.0 fold down regulated genes
[truncated: 2,754 more rows]

## Sheet: INH vs Water_up
T1 vs C1 2.0 fold up regulated genes
[truncated: 2,113 more rows]

## Sheet: INH vs Water_down
T1 vs C1 2.0 fold down regulated genes
[truncated: 2,280 more rows]

[truncated: 2 more sheets: NBXH-H vs Water_up, NBXH-H vs Water_down]
