# Supplementary material for: Chinese Traditional Medicine NiuBeiXiaoHe (NBXH) Extracts Have the Function of Antituberculosis and Immune Recovery in BALB/c Mice
Source: J Immunol Res. 2021 Jan 18;2021:6234560. doi: 10.1155/2021/6234560 (PMC7857905; doi:10.1155/2021/6234560)
Supplement: Supplementary Materials — Figure S1: GO BP, CC, and MF classification between before and after M. tuberculosis infection or NBXH-H treatment. The number of up- or downregulated DE genes in the top 10 terms of the biological process, cellular component, and molecular function classification was determined from the Water vs. NC group (A–F) or the NBXH-H vs. Water group (G–L). Table S1: differentially expressed genes (pass volcano plot). Table S2: significant up- or downregulated pathways. [file 6234560.f1.zip › Table S2 Significant up- or down-regualted pathways.xlsx]

## Sheet: Water vs NC_up-regulated
PathwayID	Definition	OriginalWebSite	Fisher-Pvalue	SelectionCounts	SelectionSize	Count	Size	FDR	Enrichment_Score	Genes
mmu03040	Spliceosome	http://www.genome.jp/kegg-bin/show_pathway?mmu03040+11834+71713+71702+66070+13207+13204+100043292+15382+229279+15387+193740+15481+57905+66373+17149+76522+433702+68092+20826+66101+54633+230596+66921+76938+67039+60365+76479+66585+20630+20641+67332+20643+68011+20384+68592+331401+73666+101214+20462+108121+28035+66492	1.0064e-12	42	711	136	7584	2.78773e-10	11.9972	AQR//CDC40//CDC5L//CWC15//DDX5//DHX15//GM4340//HNRNPA1//HNRNPA3//HNRNPK//HSPA1A//HSPA8//ISY1//LSM5//MAGOH//NAA38//NCBP1//NCBP2//NHP2L1//PPIH//PQBP1//PRPF38A//PRPF38B//RBM17//RBM25//RBM8A//SMNDC1//SNRNP40//SNRPC//SNRPD1//SNRPD3//SNRPE//SNRPG//SRSF5//SYF2//THOC2//THOC3//TRA2A//TRA2B//U2AF1//USP39//ZMAT2
mmu03008	Ribosome biogenesis in eukaryotes	http://www.genome.jp/kegg-bin/show_pathway?mmu03008+213895+12995+13000+14000+30877+69237+100019+67973+20826+97112+67619+67134+55989+67459+19384+66932+104444+71340+54364+227522+208366+72554+195434+217109+225348+72515+24127	1.0817e-08	27	711	87	7584	1.49816e-06	7.96589	BMS1//CSNK2A1//CSNK2A2//DROSHA//GNL3//GTPBP4//MDN1//MPHOSPH10//NHP2L1//NMD3//NOB1//NOP56//NOP58//NVL//RAN//REXO1//REXO2//RIOK1//RPP30//RPP38//RPP40//UTP14A//UTP14B//UTP18//WDR36//WDR43//XRN1
mmu03013	RNA transport	http://www.genome.jp/kegg-bin/show_pathway?mmu03013+12729+53975+108067+26905+16341+54709+13682+75705+13684+26987+230861+68626+14265+100043292+408192+17149+433702+68092+97112+18141+269966+218693+56698+19384+60365+19826+54364+227522+208366+72124+20595+51796+20901+170930+331401+73666+108989+70047+67031+73192	2.70016e-08	40	711	170	7584	2.49315e-06	7.56861	CLNS1A//DDX20//EIF2B3//EIF2S3X//EIF3E//EIF3I//EIF4A2//EIF4B//EIF4E//EIF4E2//EIF4G3//ELAC2//FMR1//GM4340//GM9839//MAGOH//NCBP1//NCBP2//NMD3//NUP50//NUP98//PAIP1//PHAX//RAN//RBM8A//RNPS1//RPP30//RPP38//RPP40//SEH1L//SMN1//SRRM1//STRAP//SUMO2//THOC2//THOC3//TPR//TRNT1//UPF3A//XPOT
mmu05140	Leishmaniasis	http://www.genome.jp/kegg-bin/show_pathway?mmu05140+14960+14998+15000+15001+15002+15978+15980+16061+16153+16159+16175+266632+16415+16476+26409+17357+17970+18035+18036+19225+24088+21926	5.95828e-08	22	711	66	7584	4.12611e-06	7.22488	H2-AA//H2-DMA//H2-DMB2//H2-OA//H2-OB//IFNG//IFNGR2//IGH-VJ558//IL10//IL12A//IL1A//IRAK4//ITGB2L//JUN//MAP3K7//MARCKSL1//NCF2//NFKBIA//NFKBIB//PTGS2//TLR2//TNF
mmu05166	HTLV-I infection	http://www.genome.jp/kegg-bin/show_pathway?mmu05166+104111+56317+11908+11909+11920+12500+12502+52563+217232+12575+12916+70461+13383+13653+13654+13714+23871+23872+14960+14998+15000+224754+14990+15001+15002+15007+15024+15051+16178+16186+16415+16476+16653+56150+26398+17869+18021+18035+18707+18708+18972+18974+59001+19057+19384+19385+66922+11740+21813+21926+72049+22419	9.15948e-07	52	711	280	7584	5.07436e-05	6.03813	ADCY3//ANAPC7//ATF1//ATF2//ATM//CD3D//CD3G//CDC23//CDC27//CDKN1A//CREM//CRTC3//DLG1//EGR1//EGR2//ELK4//ETS1//ETS2//H2-AA//H2-DMA//H2-DMB2//H2-M11//H2-M2//H2-OA//H2-OB//H2-Q10//H2-T10//H2-T9//IL1R2//IL2RG//ITGB2L//JUN//KRAS//MAD2L1//MAP2K4//MYC//NFATC3//NFKBIA//PIK3CD//PIK3R1//POLD2//POLE2//POLE3//PPP3CC//RAN//RANBP1//RRAS2//SLC25A5//TGFBR2//TNF//TNFRSF13C//WNT5B
mmu05168	Herpes simplex infection	http://www.genome.jp/kegg-bin/show_pathway?mmu05168+20296+12534+12995+13000+13063+66656+68077+100043292+14960+14998+15000+224754+14990+15001+15002+15007+15024+15051+67933+15312+15387+15975+15978+15980+56489+16159+16476+26409+26420+18035+18036+18626+21402+20384+209361+407786+21354+21355+24088+21926+230979	2.51942e-06	41	711	207	7584	0.000116313	5.5987	CCL2//CDK1//CSNK2A1//CSNK2A2//CYCS//EEF1D//GLTSCR2//GM4340//H2-AA//H2-DMA//H2-DMB2//H2-M11//H2-M2//H2-OA//H2-OB//H2-Q10//H2-T10//H2-T9//HCFC2//HMGN1//HNRNPK//IFNAR1//IFNG//IFNGR2//IKBKE//IL12A//JUN//MAP3K7//MAPK9//NFKBIA//NFKBIB//PER1//SKP1A//SRSF5//TAF3//TAF9B//TAP1//TAP2//TLR2//TNF//TNFRSF14
mmu05321	Inflammatory bowel disease (IBD)	http://www.genome.jp/kegg-bin/show_pathway?mmu05321+14960+14998+15000+15001+15002+15978+15980+16153+16159+16162+16163+16171+16175+16186+16476+20848+24088+21926	4.08219e-06	18	711	59	7584	0.000161538	5.38911	H2-AA//H2-DMA//H2-DMB2//H2-OA//H2-OB//IFNG//IFNGR2//IL10//IL12A//IL12RB2//IL13//IL17A//IL1A//IL2RG//JUN//STAT3//TLR2//TNF
mmu05310	Asthma	http://www.genome.jp/kegg-bin/show_pathway?mmu05310+13861+14960+14998+15000+15001+15002+16061+16153+16163+19074+21926	5.94139e-06	11	711	25	7584	0.000205721	5.22611	EPX//H2-AA//H2-DMA//H2-DMB2//H2-OA//H2-OB//IGH-VJ558//IL10//IL13//PRG2//TNF
mmu05323	Rheumatoid arthritis	http://www.genome.jp/kegg-bin/show_pathway?mmu05323+20296+12519+12977+12477+13038+14254+14960+14998+15000+15001+15002+15978+16061+16171+16175+16415+16476+16994+24088+21926+22339	1.73382e-05	21	711	83	7584	0.000533632	4.761	CCL2//CD80//CSF1//CTLA4//CTSK//FLT1//H2-AA//H2-DMA//H2-DMB2//H2-OA//H2-OB//IFNG//IGH-VJ558//IL17A//IL1A//ITGB2L//JUN//LTB//TLR2//TNF//VEGFA
mmu05330	Allograft rejection	http://www.genome.jp/kegg-bin/show_pathway?mmu05330+12519+14960+14998+15000+224754+14990+15001+15002+15007+15024+15051+15978+16061+16153+16159+21926	2.71989e-05	16	711	55	7584	0.000753409	4.56545	CD80//H2-AA//H2-DMA//H2-DMB2//H2-M11//H2-M2//H2-OA//H2-OB//H2-Q10//H2-T10//H2-T9//IFNG//IGH-VJ558//IL10//IL12A//TNF
mmu05145	Toxoplasmosis - Mus musculus (mouse)	http://www.genome.jp/kegg-bin/show_pathway?mmu05145+11796+13063+14960+14998+15000+15001+15002+193740+15481+15978+15980+16153+16159+266632+15944+26399+26409+26420+18035+18036+18707+18708+20848+24088+21926	3.46103e-05	25	711	113	7584	0.00087155	4.4608	BIRC3//CYCS//H2-AA//H2-DMA//H2-DMB2//H2-OA//H2-OB//HSPA1A//HSPA8//IFNG//IFNGR2//IL10//IL12A//IRAK4//IRGM1//MAP2K6//MAP3K7//MAPK9//NFKBIA//NFKBIB//PIK3CD//PIK3R1//STAT3//TLR2//TNF
mmu05150	Staphylococcus aureus infection - Mus musculus (mouse)	http://www.genome.jp/kegg-bin/show_pathway?mmu05150+12262+50909+12268+14962+14960+14998+15000+15001+15002+16061+16153+16415+16661+17175+19204	5.39368e-05	15	711	52	7584	0.00124504	4.26811	C1QC//C1RA//C4B//CFB//H2-AA//H2-DMA//H2-DMB2//H2-OA//H2-OB//IGH-VJ558//IL10//ITGB2L//KRT10//MASP2//PTAFR
mmu05169	Epstein-Barr virus infection - Mus musculus (mouse)	http://www.genome.jp/kegg-bin/show_pathway?mmu05169+11909+12505+12534+12575+12995+13000+224754+14990+15007+15024+15051+15182+193740+15481+15978+16061+16153+16476+26398+26399+26409+26420+17869+18035+18036+18707+18708+18803+20018+67065+70408+69870+66997+19231+19384+20848+21929+22630	8.4564e-05	38	711	215	7584	0.00180186	4.07282	ATF2//CD44//CDK1//CDKN1A//CSNK2A1//CSNK2A2//H2-M11//H2-M2//H2-Q10//H2-T10//H2-T9//HDAC2//HSPA1A//HSPA8//IFNG//IGH-VJ558//IL10//JUN//MAP2K4//MAP2K6//MAP3K7//MAPK9//MYC//NFKBIA//NFKBIB//PIK3CD//PIK3R1//PLCG1//POLR1D//POLR3D//POLR3F//POLR3GL//PSMD12//PTMA//RAN//STAT3//TNFAIP3//YWHAQ
mmu04660	T cell receptor signaling pathway - Mus musculus (mouse)	http://www.genome.jp/kegg-bin/show_pathway?mmu04660+12503+12500+12502+12525+12477+13383+15978+16153+16428+16476+16653+26409+26420+18021+18035+18036+18707+18708+18803+19057+18761+11848+21926	9.70638e-05	23	711	106	7584	0.00192048	4.01294	CD247//CD3D//CD3G//CD8A//CTLA4//DLG1//IFNG//IL10//ITK//JUN//KRAS//MAP3K7//MAPK9//NFATC3//NFKBIA//NFKBIB//PIK3CD//PIK3R1//PLCG1//PPP3CC//PRKCQ//RHOA//TNF
mmu04612	Antigen processing and presentation - Mus musculus (mouse)	http://www.genome.jp/kegg-bin/show_pathway?mmu04612+12525+14960+14998+15000+224754+14990+15001+15002+15007+15024+15051+193740+14828+15481+15978+14827+21354+21355+21926	0.000109627	19	711	80	7584	0.00196115	3.96008	CD8A//H2-AA//H2-DMA//H2-DMB2//H2-M11//H2-M2//H2-OA//H2-OB//H2-Q10//H2-T10//H2-T9//HSPA1A//HSPA5//HSPA8//IFNG//PDIA3//TAP1//TAP2//TNF
mmu00230	Purine metabolism - Mus musculus (mouse)	http://www.genome.jp/kegg-bin/show_pathway?mmu00230+104111+11534+11564+11637+11639+229665+76025+18605+12499+229363+14923+68695+15452+23918+18103+56520+18576+18578+238871+18583+18972+18974+59001+20018+67065+70408+69870+231327+19076+328099+110639+382985	0.000113279	32	711	172	7584	0.00196115	3.94585	ADCY3//ADK//ADSL//AK2//AK4//AMPD1//CANT1//ENPP1//ENTPD5//GMPS//GUK1//HDDC3//HPRT//IMPDH2//NME2//NME4//PDE3B//PDE4B//PDE4D//PDE7A//POLD2//POLE2//POLE3//POLR1D//POLR3D//POLR3F//POLR3GL//PPAT//PRIM2//PRPS1L3//PRPS2//RRM2B
mmu05134	Legionellosis - Mus musculus (mouse)	http://www.genome.jp/kegg-bin/show_pathway?mmu05134+12747+14825+20310+13063+67160+56422+193740+15481+16159+16415+18035+20224+20333+24088+21926	0.000210054	15	711	58	7584	0.00324172	3.67767	CLK1//CXCL1//CXCL2//CYCS//EEF1G//HBS1L//HSPA1A//HSPA8//IL12A//ITGB2L//NFKBIA//SAR1A//SEC22B//TLR2//TNF
mmu05164	Influenza A - Mus musculus (mouse)	http://www.genome.jp/kegg-bin/show_pathway?mmu05164+11909+20296+54188+15945+13063+14960+14998+15000+15001+15002+193740+15481+15975+15978+15980+56489+16159+16175+266632+117198+16476+26398+26399+26420+18035+18036+269966+18707+18708+214523+21926	0.000210653	31	711	170	7584	0.00324172	3.67643	ATF2//CCL2//CPSF4//CXCL10//CYCS//H2-AA//H2-DMA//H2-DMB2//H2-OA//H2-OB//HSPA1A//HSPA8//IFNAR1//IFNG//IFNGR2//IKBKE//IL12A//IL1A//IRAK4//IVNS1ABP//JUN//MAP2K4//MAP2K6//MAPK9//NFKBIA//NFKBIB//NUP98//PIK3CD//PIK3R1//TMPRSS4//TNF
mmu04940	Type I diabetes mellitus - Mus musculus (mouse)	http://www.genome.jp/kegg-bin/show_pathway?mmu04940+12519+14960+14998+15000+224754+14990+15001+15002+15007+15024+15051+15978+16159+16175+21926	0.000381643	15	711	61	7584	0.00556395	3.41834	CD80//H2-AA//H2-DMA//H2-DMB2//H2-M11//H2-M2//H2-OA//H2-OB//H2-Q10//H2-T10//H2-T9//IFNG//IL12A//IL1A//TNF
mmu05332	Graft-versus-host disease - Mus musculus (mouse)	http://www.genome.jp/kegg-bin/show_pathway?mmu05332+12519+14960+14998+15000+224754+14990+15001+15002+15007+15024+15051+15978+16175+21926	0.000494941	14	711	56	7584	0.00685494	3.30545	CD80//H2-AA//H2-DMA//H2-DMB2//H2-M11//H2-M2//H2-OA//H2-OB//H2-Q10//H2-T10//H2-T9//IFNG//IL1A//TNF
mmu04066	HIF-1 signaling pathway - Mus musculus (mouse)	http://www.genome.jp/kegg-bin/show_pathway?mmu04066+11863+12575+71745+13614+112405+13684+26987+14254+15251+15978+15980+16828+56717+68263+18707+18708+18803+20104+72508+20848+22042+22339	0.000684918	22	711	113	7584	0.0090344	3.16436	ARNT//CDKN1A//CUL2//EDN1//EGLN1//EIF4E//EIF4E2//FLT1//HIF1A//IFNG//IFNGR2//LDHA//MTOR//PDHB//PIK3CD//PIK3R1//PLCG1//RPS6//RPS6KB1//STAT3//TFRC//VEGFA
mmu05416	Viral myocarditis - Mus musculus (mouse)	http://www.genome.jp/kegg-bin/show_pathway?mmu05416+12519+13063+13137+230861+14960+14998+15000+224754+14990+15001+15002+15007+15024+15051+16061+16415+19354	0.000849438	17	711	79	7584	0.0106952	3.07087	CD80//CYCS//DAF2//EIF4G3//H2-AA//H2-DMA//H2-DMB2//H2-M11//H2-M2//H2-OA//H2-OB//H2-Q10//H2-T10//H2-T9//IGH-VJ558//ITGB2L//RAC2
mmu04668	TNF signaling pathway - Mus musculus (mouse)	http://www.genome.jp/kegg-bin/show_pathway?mmu04668+11909+11796+20296+12977+14825+15945+20310+13614+16476+16477+26398+26399+26409+26420+17395+18035+18707+18708+19225+21926+21929	0.00103603	21	711	109	7584	0.0124375	2.98463	ATF2//BIRC3//CCL2//CSF1//CXCL1//CXCL10//CXCL2//EDN1//JUN//JUNB//MAP2K4//MAP2K6//MAP3K7//MAPK9//MMP9//NFKBIA//PIK3CD//PIK3R1//PTGS2//TNF//TNFAIP3
mmu05142	Chagas disease (American trypanosomiasis) - Mus musculus (mouse)	http://www.genome.jp/kegg-bin/show_pathway?mmu05142+12262+20296+12503+12500+12502+15978+15980+16153+16159+266632+16476+26398+26420+18035+18707+18708+18795+21813+24088+21926	0.00107762	20	711	102	7584	0.0124375	2.96753	C1QC//CCL2//CD247//CD3D//CD3G//IFNG//IFNGR2//IL10//IL12A//IRAK4//JUN//MAP2K4//MAPK9//NFKBIA//PIK3CD//PIK3R1//PLCB1//TGFBR2//TLR2//TNF
mmu05162	Measles - Mus musculus (mouse)	http://www.genome.jp/kegg-bin/show_pathway?mmu05162+12500+12502+12995+13000+193740+15481+15975+15978+15980+16061+56489+16159+16163+16175+16186+266632+26409+18035+18036+18707+18708+18761+20848+24088+21929	0.00115139	25	711	140	7584	0.0127574	2.93878	CD3D//CD3G//CSNK2A1//CSNK2A2//HSPA1A//HSPA8//IFNAR1//IFNG//IFNGR2//IGH-VJ558//IKBKE//IL12A//IL13//IL1A//IL2RG//IRAK4//MAP3K7//NFKBIA//NFKBIB//PIK3CD//PIK3R1//PRKCQ//STAT3//TLR2//TNFAIP3
mmu04150	mTOR signaling pathway - Mus musculus (mouse)	http://www.genome.jp/kegg-bin/show_pathway?mmu04150+69008+75705+13684+26987+15251+56717+18707+18708+20104+110651+72508+54170+21926+22339	0.0014614	14	711	62	7584	0.0155695	2.83523	CAB39L//EIF4B//EIF4E//EIF4E2//HIF1A//MTOR//PIK3CD//PIK3R1//RPS6//RPS6KA3//RPS6KB1//RRAGC//TNF//VEGFA
mmu05210	Colorectal cancer - Mus musculus (mouse)	http://www.genome.jp/kegg-bin/show_pathway?mmu05210+13063+16476+16653+16842+26420+17686+17869+18707+18708+19354+11848+21414+21415+21813	0.00201737	14	711	64	7584	0.0206967	2.69522	CYCS//JUN//KRAS//LEF1//MAPK9//MSH3//MYC//PIK3CD//PIK3R1//RAC2//RHOA//TCF7//TCF7L1//TGFBR2
mmu04620	Toll-like receptor signaling pathway - Mus musculus (mouse)	http://www.genome.jp/kegg-bin/show_pathway?mmu04620+12519+13038+15945+17329+15975+56489+16159+266632+16476+26398+26399+26409+26420+18035+18707+18708+20750+24088+21926	0.00235487	19	711	101	7584	0.0232963	2.62803	CD80//CTSK//CXCL10//CXCL9//IFNAR1//IKBKE//IL12A//IRAK4//JUN//MAP2K4//MAP2K6//MAP3K7//MAPK9//NFKBIA//PIK3CD//PIK3R1//SPP1//TLR2//TNF
mmu04144	Endocytosis - Mus musculus (mouse)	http://www.genome.jp/kegg-bin/show_pathway?mmu04144+11555+212285+228998+77038+12390+208092+74325+67300+227288+12767+14254+14772+224754+14990+15007+15024+15051+193740+15481+16186+93737+18720+75767+19341+54189+11848+54673+58194+69780+20844+22042+21813+330192+116733	0.0025034	34	711	221	7584	0.0237645	2.60147	ADRB2//ARAP2//ARFGAP1//ARFGAP2//CAV2//CHMP6//CLTB//CLTC//CXCR1//CXCR4//FLT1//GRK4//H2-M11//H2-M2//H2-Q10//H2-T10//H2-T9//HSPA1A//HSPA8//IL2RG//PARD6G//PIP5K1A//RAB11FIP1//RAB4A//RABEP1//RHOA//SH3GLB1//SH3KBP1//SMAP2//STAM//TFRC//TGFBR2//VPS37B//VPS4A
mmu03010	Ribosome - Mus musculus (mouse)	http://www.genome.jp/kegg-bin/show_pathway?mmu03010+66419+56282+27395+94063+353242+78523+64659+66407+77721+67115+66480+319195+19933+65019+19941+26451+114641+100503670+27176+26961+267019+16898+75617+20104+16785+225215	0.00257377	26	711	156	7584	0.0237645	2.58943	MRPL11//MRPL12//MRPL15//MRPL16//MRPL21//MRPL9//MRPS14//MRPS15//MRPS5//RPL14//RPL15//RPL17//RPL21//RPL23//RPL26//RPL27A//RPL31//RPL5//RPL7A//RPL8//RPS15A//RPS2//RPS25//RPS6//RPSA//RSL24D1
mmu04110	Cell cycle - Mus musculus (mouse)	http://www.genome.jp/kegg-bin/show_pathway?mmu04110+56317+11920+12235+268697+52563+217232+23834+12545+12534+12575+12577+27214+13559+15182+56150+17869+18392+18393+56452+19650+21402+22630	0.00363439	22	711	128	7584	0.032475	2.43957	ANAPC7//ATM//BUB1//CCNB1//CDC23//CDC27//CDC6//CDC7//CDK1//CDKN1A//CDKN1C//DBF4//E2F5//HDAC2//MAD2L1//MYC//ORC1//ORC2//ORC6//RBL1//SKP1A//YWHAQ
mmu05320	Autoimmune thyroid disease - Mus musculus (mouse)	http://www.genome.jp/kegg-bin/show_pathway?mmu05320+12519+12477+14960+14998+15000+224754+14990+15001+15002+15007+15024+15051+16061+16153	0.00481478	14	711	70	7584	0.0413987	2.31742	CD80//CTLA4//H2-AA//H2-DMA//H2-DMB2//H2-M11//H2-M2//H2-OA//H2-OB//H2-Q10//H2-T10//H2-T9//IGH-VJ558//IL10
mmu05340	Primary immunodeficiency - Mus musculus (mouse)	http://www.genome.jp/kegg-bin/show_pathway?mmu05340+12500+12525+227525+16061+16186+19373+21354+21355+72049	0.00493198	9	711	36	7584	0.0413987	2.30698	CD3D//CD8A//DCLRE1C//IGH-VJ558//IL2RG//RAG1//TAP1//TAP2//TNFRSF13C
mmu04672	Intestinal immune network for IgA production - Mus musculus (mouse)	http://www.genome.jp/kegg-bin/show_pathway?mmu04672+12519+12767+14960+14998+15000+15001+15002+16061+16153+72049	0.00541775	10	711	43	7584	0.0436235	2.26618	CD80//CXCR4//H2-AA//H2-DMA//H2-DMB2//H2-OA//H2-OB//IGH-VJ558//IL10//TNFRSF13C
mmu00240	Pyrimidine metabolism - Mus musculus (mouse)	http://www.genome.jp/kegg-bin/show_pathway?mmu00240+76025+55936+110074+12499+18103+56520+18972+18974+59001+20018+67065+70408+69870+19076+382985+80914+22247+22271	0.00551199	18	711	101	7584	0.0436235	2.25869	CANT1//CTPS2//DUT//ENTPD5//NME2//NME4//POLD2//POLE2//POLE3//POLR1D//POLR3D//POLR3F//POLR3GL//PRIM2//RRM2B//UCK2//UMPS//UPP1
mmu04380	Osteoclast differentiation - Mus musculus (mouse)	http://www.genome.jp/kegg-bin/show_pathway?mmu04380+12326+12977+13038+74256+15975+15978+15980+16175+16476+16477+16478+26399+26409+26420+17970+18035+18707+18708+19057+21813+21926	0.00638377	21	711	126	7584	0.0491196	2.19492	CAMK4//CSF1//CTSK//CYLD//IFNAR1//IFNG//IFNGR2//IL1A//JUN//JUNB//JUND//MAP2K6//MAP3K7//MAPK9//NCF2//NFKBIA//PIK3CD//PIK3R1//PPP3CC//TGFBR2//TNF
mmu04621	NOD-like receptor signaling pathway - Mus musculus (mouse)	http://www.genome.jp/kegg-bin/show_pathway?mmu04621+11796+20296+14825+20310+26409+26420+18035+18036+192656+67955+21926+21929	0.00661887	12	711	58	7584	0.0495521	2.17922	BIRC3//CCL2//CXCL1//CXCL2//MAP3K7//MAPK9//NFKBIA//NFKBIB//RIPK2//SUGT1//TNF//TNFAIP3
mmu04141	Protein processing in endoplasmic reticulum - Mus musculus (mouse)	http://www.genome.jp/kegg-bin/show_pathway?mmu04141+66861+78943+193740+14828+15481+12282+26420+56453+14827+71853+17872+50907+19359+20224+69162+140740+21402+67437+16430+68292+80286+216080+66105+56228+56085+22230	0.00766253	26	711	169	7584	0.0558558	2.11563	DNAJC10//ERN1//HSPA1A//HSPA5//HSPA8//HYOU1//MAPK9//MBTPS1//PDIA3//PDIA6//PPP1R15A//PREB//RAD23B//SAR1A//SEC31A//SEC63//SKP1A//SSR3//STT3A//STT3B//TUSC3//UBE2D1//UBE2D3//UBE2J1//UBQLN1//UFD1L
mmu05133	Pertussis - Mus musculus (mouse)	http://www.genome.jp/kegg-bin/show_pathway?mmu05133+12262+50909+12268+70405+16153+16159+16175+266632+16362+16415+16476+26420+11848+21926	0.00801099	14	711	74	7584	0.0568986	2.09631	C1QC//C1RA//C4B//CALML3//IL10//IL12A//IL1A//IRAK4//IRF1//ITGB2L//JUN//MAPK9//RHOA//TNF
mmu04115	p53 signaling pathway - Mus musculus (mouse)	http://www.genome.jp/kegg-bin/show_pathway?mmu04115+11920+268697+12521+12534+12575+13063+29870+17248+64058+382985+140742+75747+20438	0.0107795	13	711	69	7584	0.0746479	1.9674	ATM//CCNB1//CD82//CDK1//CDKN1A//CYCS//GTSE1//MDM4//PERP//RRM2B//SESN1//SESN3//SIAH1B
mmu00460	Cyanoamino acid metabolism - Mus musculus (mouse)	http://www.genome.jp/kegg-bin/show_pathway?mmu00460+14598+23887+20425	0.0132177	3	711	6	7584	0.0879282	1.87885	GGT1//GGT5//SHMT1
mmu04064	NF-kappa B signaling pathway - Mus musculus (mouse)	http://www.genome.jp/kegg-bin/show_pathway?mmu04064+11920+11796+12995+13000+20310+111173+16061+266632+16994+26409+18035+18803+18761+19225+21926+21929+72049	0.0133321	17	711	102	7584	0.0879282	1.8751	ATM//BIRC3//CSNK2A1//CSNK2A2//CXCL2//ERC1//IGH-VJ558//IRAK4//LTB//MAP3K7//NFKBIA//PLCG1//PRKCQ//PTGS2//TNF//TNFAIP3//TNFRSF13C
mmu04310	Wnt signaling pathway - Mus musculus (mouse)	http://www.genome.jp/kegg-bin/show_pathway?mmu04310+93687+12995+13000+212398+408192+16476+16842+26409+26420+17869+18021+18795+19057+19354+11848+20319+20438+21402+21372+21414+21415+22419	0.0145654	22	711	144	7584	0.0938285	1.83668	CSNK1A1//CSNK2A1//CSNK2A2//FRAT2//GM9839//JUN//LEF1//MAP3K7//MAPK9//MYC//NFATC3//PLCB1//PPP3CC//RAC2//RHOA//SFRP2//SIAH1B//SKP1A//TBL1X//TCF7//TCF7L1//WNT5B
mmu05221	Acute myeloid leukemia - Mus musculus (mouse)	http://www.genome.jp/kegg-bin/show_pathway?mmu05221+16653+16842+56717+17869+18707+18708+18712+72508+20848+21414+21415	0.0153493	11	711	57	7584	0.0966307	1.81391	KRAS//LEF1//MTOR//MYC//PIK3CD//PIK3R1//PIM1//RPS6KB1//STAT3//TCF7//TCF7L1
mmu05205	Proteoglycans in cancer - Mus musculus (mouse)	http://www.genome.jp/kegg-bin/show_pathway?mmu05205+12390+12505+12575+13207+14000+75705+13982+14168+15200+15251+16653+17395+56717+17869+18707+18708+18793+18803+19206+19684+11848+19877+20104+72508+66922+20971+20848+24088+21926+22339+22419	0.0215993	31	711	228	7584	0.132956	1.66556	CAV2//CD44//CDKN1A//DDX5//DROSHA//EIF4B//ESR1//FGF13//HBEGF//HIF1A//KRAS//MMP9//MTOR//MYC//PIK3CD//PIK3R1//PLAUR//PLCG1//PTCH1//RDX//RHOA//ROCK1//RPS6//RPS6KB1//RRAS2//SDC4//STAT3//TLR2//TNF//VEGFA//WNT5B
mmu04622	RIG-I-like receptor signaling pathway - Mus musculus (mouse)	http://www.genome.jp/kegg-bin/show_pathway?mmu04622+15945+74256+13205+56489+16159+100038882+26409+26420+18035+18036+67664+21926	0.0228613	12	711	68	7584	0.137665	1.6409	CXCL10//CYLD//DDX3X//IKBKE//IL12A//ISG15//MAP3K7//MAPK9//NFKBIA//NFKBIB//RNF125//TNF
mmu04919	Thyroid hormone signaling pathway - Mus musculus (mouse)	http://www.genome.jp/kegg-bin/show_pathway?mmu04919+11931+11933+13982+56458+15182+15251+16653+19014+76199+26896+56717+17869+18128+18707+18708+18795+18803+21834	0.0258702	18	711	118	7584	0.152469	1.5872	ATP1B1//ATP1B3//ESR1//FOXO1//HDAC2//HIF1A//KRAS//MED1//MED13L//MED14//MTOR//MYC//NOTCH1//PIK3CD//PIK3R1//PLCB1//PLCG1//THRB
mmu04012	ErbB signaling pathway - Mus musculus (mouse)	http://www.genome.jp/kegg-bin/show_pathway?mmu04012+11839+12575+15200+16476+16653+26398+26420+56717+17869+100042150+18707+18708+18803+72508	0.0307614	14	711	87	7584	0.172309	1.51199	AREG//CDKN1A//HBEGF//JUN//KRAS//MAP2K4//MAPK9//MTOR//MYC//NRG2//PIK3CD//PIK3R1//PLCG1//RPS6KB1
mmu05161	Hepatitis B - Mus musculus (mouse)	http://www.genome.jp/kegg-bin/show_pathway?mmu05161+11909+12575+13063+13205+13654+15975+56489+16476+16653+26398+26420+17395+17869+18021+18035+18707+18708+20848+24088+21926+22630	0.0307967	21	711	146	7584	0.172309	1.5115	ATF2//CDKN1A//CYCS//DDX3X//EGR2//IFNAR1//IKBKE//JUN//KRAS//MAP2K4//MAPK9//MMP9//MYC//NFATC3//NFKBIA//PIK3CD//PIK3R1//STAT3//TLR2//TNF//YWHAQ
mmu04920	Adipocytokine signaling pathway - Mus musculus (mouse)	http://www.genome.jp/kegg-bin/show_pathway?mmu04920+74205+433256+12895+26420+56717+18035+18036+18976+19017+18761+20848+21926	0.0311026	12	711	71	7584	0.172309	1.5072	ACSL3//ACSL5//CPT1B//MAPK9//MTOR//NFKBIA//NFKBIB//POMC//PPARGC1A//PRKCQ//STAT3//TNF
mmu05322	Systemic lupus erythematosus - Mus musculus (mouse)	http://www.genome.jp/kegg-bin/show_pathway?mmu05322+12262+50909+12268+12519+13035+14960+14998+15000+15001+15002+26914+15081+360198+78303+15978+16061+16153+20641+67332+20823+21926	0.0328943	21	711	147	7584	0.178662	1.48288	C1QC//C1RA//C4B//CD80//CTSG//H2-AA//H2-DMA//H2-DMB2//H2-OA//H2-OB//H2AFY//H3F3B//HIST1H3A//HIST3H2BA//IFNG//IGH-VJ558//IL10//SNRPD1//SNRPD3//SSB//TNF
mmu04914	Progesterone-mediated oocyte maturation - Mus musculus (mouse)	http://www.genome.jp/kegg-bin/show_pathway?mmu04914+104111+56317+12235+268697+52563+217232+12534+16653+56150+26420+18576+18707+18708+110651	0.0335589	14	711	88	7584	0.178766	1.47419	ADCY3//ANAPC7//BUB1//CCNB1//CDC23//CDC27//CDK1//KRAS//MAD2L1//MAPK9//PDE3B//PIK3CD//PIK3R1//RPS6KA3
mmu03015	mRNA surveillance pathway - Mus musculus (mouse)	http://www.genome.jp/kegg-bin/show_pathway?mmu03015+98985+54188+225363+66899+100043292+56422+17149+433702+68092+74737+21770+60365+19826+51796+67031	0.035654	15	711	97	7584	0.186343	1.44789	CLP1//CPSF4//ETF1//FIP1L1//GM4340//HBS1L//MAGOH//NCBP1//NCBP2//PCF11//PPP2R5D//RBM8A//RNPS1//SRRM1//UPF3A
mmu04915	Estrogen signaling pathway - Mus musculus (mouse)	http://www.genome.jp/kegg-bin/show_pathway?mmu04915+104111+11909+70405+13982+14228+54393+15200+193740+15481+16476+16653+17395+18707+18708+18795	0.0386097	15	711	98	7584	0.196363	1.4133	ADCY3//ATF2//CALML3//ESR1//FKBP4//GABBR1//HBEGF//HSPA1A//HSPA8//JUN//KRAS//MMP9//PIK3CD//PIK3R1//PLCB1
mmu04120	Ubiquitin mediated proteolysis - Mus musculus (mouse)	http://www.genome.jp/kegg-bin/show_pathway?mmu04120+56317+11796+52563+217232+71745+235439+73998+105193+56469+17344+56459+20438+21402+216080+66105+67921+22214+56228+93765+140630	0.0391862	20	711	141	7584	0.196363	1.40687	ANAPC7//BIRC3//CDC23//CDC27//CUL2//HERC1//HERC3//NHLRC1//PIAS1//PIAS2//SAE1//SIAH1B//SKP1A//UBE2D1//UBE2D3//UBE2F//UBE2H//UBE2J1//UBE2N//UBE4A
mmu04145	Phagosome - Mus musculus (mouse)	http://www.genome.jp/kegg-bin/show_pathway?mmu04145+50909+235661+14960+14998+15000+224754+14990+15001+15002+15007+15024+15051+16061+16415+17523+20288+17970+18779+20333+21354+21355+22042+24088+22143	0.0409234	24	711	177	7584	0.196363	1.38803	C1RA//DYNC1LI1//H2-AA//H2-DMA//H2-DMB2//H2-M11//H2-M2//H2-OA//H2-OB//H2-Q10//H2-T10//H2-T9//IGH-VJ558//ITGB2L//MPO//MSR1//NCF2//PLA2R1//SEC22B//TAP1//TAP2//TFRC//TLR2//TUBA1B
mmu05152	Tuberculosis - Mus musculus (mouse)	http://www.genome.jp/kegg-bin/show_pathway?mmu05152+70405+12796+13063+14960+14998+15000+15001+15002+15526+15978+15980+16061+16153+16159+16175+266632+16415+26420+18779+19057+11848+192656+24088+21926	0.0409234	24	711	177	7584	0.196363	1.38803	CALML3//CAMP//CYCS//H2-AA//H2-DMA//H2-DMB2//H2-OA//H2-OB//HSPA9//IFNG//IFNGR2//IGH-VJ558//IL10//IL12A//IL1A//IRAK4//ITGB2L//MAPK9//PLA2R1//PPP3CC//RHOA//RIPK2//TLR2//TNF
mmu04062	Chemokine signaling pathway - Mus musculus (mouse)	http://www.genome.jp/kegg-bin/show_pathway?mmu04062+104111+20296+12768+12775+14825+15945+66102+20310+17329+227288+12767+94176+140580+14772+16428+16653+18035+18036+18707+18708+18795+19354+11848+19877+20848+73178	0.0411157	26	711	195	7584	0.196363	1.38599	ADCY3//CCL2//CCR1//CCR7//CXCL1//CXCL10//CXCL16//CXCL2//CXCL9//CXCR1//CXCR4//DOCK2//ELMO1//GRK4//ITK//KRAS//NFKBIA//NFKBIB//PIK3CD//PIK3R1//PLCB1//RAC2//RHOA//ROCK1//STAT3//WASL
mmu04060	Cytokine-cytokine receptor interaction - Mus musculus (mouse)	http://www.genome.jp/kegg-bin/show_pathway?mmu04060+11479+20296+12768+12775+21940+12977+14825+15945+66102+20310+17329+227288+12767+14254+15975+15978+15980+16153+16159+16162+16163+16171+16175+16178+16180+237310+16186+16994+21813+21926+27279+72049+230979+22339	0.0431049	34	711	269	7584	0.202374	1.36547	ACVR1B//CCL2//CCR1//CCR7//CD27//CSF1//CXCL1//CXCL10//CXCL16//CXCL2//CXCL9//CXCR1//CXCR4//FLT1//IFNAR1//IFNG//IFNGR2//IL10//IL12A//IL12RB2//IL13//IL17A//IL1A//IL1R2//IL1RAP//IL22RA2//IL2RG//LTB//TGFBR2//TNF//TNFRSF12A//TNFRSF13C//TNFRSF14//VEGFA
mmu04520	Adherens junction - Mus musculus (mouse)	http://www.genome.jp/kegg-bin/show_pathway?mmu04520+11431+12995+13000+16842+26409+19354+11848+20613+21414+21415+21813+73178	0.0451481	12	711	75	7584	0.205884	1.34536	ACP1//CSNK2A1//CSNK2A2//LEF1//MAP3K7//RAC2//RHOA//SNAI1//TCF7//TCF7L1//TGFBR2//WASL
mmu04068	FoxO signaling pathway - Mus musculus (mouse)	http://www.genome.jp/kegg-bin/show_pathway?mmu04068+11920+12125+268697+12575+66822+56458+16153+16653+26420+18707+18708+20620+20873+15469+19373+13609+20848+58231+21813	0.0466816	19	711	135	7584	0.205884	1.33085	ATM//BCL2L11//CCNB1//CDKN1A//FBXO25//FOXO1//IL10//KRAS//MAPK9//PIK3CD//PIK3R1//PLK2//PLK4//PRMT1//RAG1//S1PR1//STAT3//STK4//TGFBR2
mmu03030	DNA replication - Mus musculus (mouse)	http://www.genome.jp/kegg-bin/show_pathway?mmu03030+14156+18972+18974+59001+19076+69263+381760	0.0466909	7	711	36	7584	0.205884	1.33077	FEN1//POLD2//POLE2//POLE3//PRIM2//RFC3//SSBP1
mmu04010	MAPK signaling pathway - Mus musculus (mouse)	http://www.genome.jp/kegg-bin/show_pathway?mmu04010+11909+56808+12297+63953+13537+319520+18218+13714+14168+193740+15481+16175+16178+16476+16478+16653+26398+23938+26399+26405+26409+26420+102626+17869+18021+19057+19354+110651+66922+58231+21813+21926	0.048245	32	711	253	7584	0.205884	1.31655	ATF2//CACNA2D2//CACNB3//DUSP10//DUSP2//DUSP4//DUSP8//ELK4//FGF13//HSPA1A//HSPA8//IL1A//IL1R2//JUN//JUND//KRAS//MAP2K4//MAP2K5//MAP2K6//MAP3K2//MAP3K7//MAPK9//MAPKAPK3//MYC//NFATC3//PPP3CC//RAC2//RPS6KA3//RRAS2//STK4//TGFBR2//TNF
mmu05202	Transcriptional misregulation in cancer - Mus musculus (mouse)	http://www.genome.jp/kegg-bin/show_pathway?mmu05202+11908+11920+11796+140780+12455+12775+12575+13207+13714+14254+56458+233908+15081+15182+360198+16061+16178+70122+17395+17523+17869+18124+19696+21813	0.0483239	24	711	180	7584	0.205884	1.31584	ATF1//ATM//BIRC3//BMP2K//CCNT1//CCR7//CDKN1A//DDX5//ELK4//FLT1//FOXO1//FUS//H3F3B//HDAC2//HIST1H3A//IGH-VJ558//IL1R2//MLLT3//MMP9//MPO//MYC//NR4A3//REL//TGFBR2
mmu05216	Thyroid cancer - Mus musculus (mouse)	http://www.genome.jp/kegg-bin/show_pathway?mmu05216+16653+16842+17869+21414+21415+108989	0.04879	6	711	29	7584	0.205884	1.31167	KRAS//LEF1//MYC//TCF7//TCF7L1//TPR
mmu04320	Dorso-ventral axis formation - Mus musculus (mouse)	http://www.genome.jp/kegg-bin/show_pathway?mmu04320+23871+23872+16653+18128+57746	0.0490555	5	711	22	7584	0.205884	1.30931	ETS1//ETS2//KRAS//NOTCH1//PIWIL2

## Sheet: Water vs NC_down-regulated
#Column "PathwayID" stands for Pathway identifiers used in KEGG
#Column "Definition" stands for the definition of the PathwayID
#Column "OriginalWebSite"stands for The map's website,the nodes with red frame and red symbol are associated with the DE genes, green nodes have no significance
#Column "p-value"
"Fisher-Pvalue" stands for the enrichment p-value of the PathwayID used Fisher's exact test
#Column "SelectionCounts" stands for the Count of the DE genes' entities directly associated with the listed PathwayID
#Column "SelectionSize" stands for the total number of the DE genes' entities
#Column "Count" stands for the count of the chosen background population genes' entities associated with the listed PathwayID
#Column "Size" stands for the total number of chosen background population genes' entities
#Column "FDR" stands for the false discovery rate of the PathwayID
#Column "Enrichment_Score" stands for the Enrichment Score value of the PathwayID, it equals "-log10(Pvalue)"
#Column "GENES" stands for the DE genes associated with the PathwayID
PathwayID	Definition	OriginalWebSite	Fisher-Pvalue	SelectionCounts	SelectionSize	Count	Size	FDR	Enrichment_Score	Genes
mmu04015	Rap1 signaling pathway - Mus musculus (mouse)	http://www.genome.jp/kegg-bin/show_pathway?mmu04015+224129+11512+11515+23797+11600+69710+106952+12315+12928+12978+12388+13636+13640+67112+64654+14182+14183+23880+14682+16000+16001+16399+16409+16412+16416+16542+18048+16822+26397+26417+17532+18053+18176+18441+93742+18590+18591+18596+18654+74769+18795+18797+18798+18750+19353+64143+110351+19395+240168+21825+22341	3.17196e-10	51	714	216	7584	8.78632e-08	9.49867	ADCY5//ADCY6//ADCY9//AKT3//ANGPT1//ARAP1//ARAP3//CALM3//CRK//CSF1R//CTNND1//EFNA1//EFNA5//FGF22//FGF23//FGFR1//FGFR2//FYB//GNAQ//IGF1//IGF1R//ITGA2B//ITGAM//ITGB1//ITGB3//KDR//KLK1B4//LCP2//MAP2K3//MAPK3//MRAS//NGFR//NRAS//P2RY1//PARD3//PDGFA//PDGFB//PDGFRB//PGF//PIK3CB//PLCB1//PLCB3//PLCB4//PRKCA//RAC1//RALB//RAP1GAP//RASGRP2//RASGRP3//THBS1//VEGFC
mmu04510	Focal adhesion - Mus musculus (mouse)	http://www.genome.jp/kegg-bin/show_pathway?mmu04510+60595+23797+11797+12443+12445+12842+12843+12928+56637+16000+16001+16202+16398+16399+16403+16412+16416+192897+16419+16542+16776+16777+226519+26417+98932+107589+57342+170736+18590+18591+18596+18654+74769+232807+18750+14083+19353+19878+216148+21825+81877+22330+22341+22371+11798+22793	1.58998e-08	46	714	206	7584	2.20212e-06	7.79861	ACTN4//AKT3//BIRC2//CCND1//CCND3//COL1A1//COL1A2//CRK//GSK3B//IGF1//IGF1R//ILK//ITGA2//ITGA2B//ITGA6//ITGB1//ITGB3//ITGB4//ITGB5//KDR//LAMA5//LAMB1//LAMC1//MAPK3//MYL9//MYLK//PARVA//PARVB//PDGFA//PDGFB//PDGFRB//PGF//PIK3CB//PPP1R12C//PRKCA//PTK2//RAC1//ROCK2//SHC2//THBS1//TNXB//VCL//VEGFC//VWF//XIAP//ZYX
mmu04270	Vascular smooth muscle contraction - Mus musculus (mouse)	http://www.genome.jp/kegg-bin/show_pathway?mmu04270+224129+11512+11515+11548+69632+12289+109624+12315+13117+666168+14682+60596+54195+16439+16531+26417+17540+17904+98932+107589+230899+230103+26565+66350+18783+18795+18797+18798+232807+68458+18750+19222+51801+19878	8.43519e-08	34	714	137	7584	7.7885e-06	7.0739	ADCY5//ADCY6//ADCY9//ADRA1B//ARHGEF12//CACNA1D//CALD1//CALM3//CYP4A10//CYP4A31//GNAQ//GUCY1A3//GUCY1B3//ITPR2//KCNMA1//MAPK3//MRVI1//MYL6//MYL9//MYLK//NPPA//NPR2//PLA2G10//PLA2G12A//PLA2G4A//PLCB1//PLCB3//PLCB4//PPP1R12C//PPP1R14A//PRKCA//PTGIR//RAMP1//ROCK2
mmu04961	Endocrine and other factor-regulated calcium reabsorption - Mus musculus (mouse)	http://www.genome.jp/kegg-bin/show_pathway?mmu04961+11512+11515+11773+232975+13429+14682+16612+16616+16617+16618+18050+16622+16624+18795+18797+18798+18750+53869	1.38509e-06	18	714	55	7584	9.59176e-05	5.85852	ADCY6//ADCY9//AP2M1//ATP1A3//DNM1//GNAQ//KLK1//KLK1B21//KLK1B24//KLK1B26//KLK1B3//KLK1B5//KLK1B8//PLCB1//PLCB3//PLCB4//PRKCA//RAB11A
mmu05200	Pathways in cancer - Mus musculus (mouse)	http://www.genome.jp/kegg-bin/show_pathway?mmu05200+23797+23805+12048+110279+12122+11797+12156+12159+12443+12447+12579+12606+12928+12978+12385+69635+13557+112407+13819+67112+64654+14182+14183+14255+14281+14369+56637+16000+16001+16398+16399+16403+16412+16776+16777+226519+26417+17187+17342+18176+18590+18591+18596+18654+74769+19016+18750+14083+19353+64143+218772+319757+21803+21812+22341+11798+235320	1.93406e-06	57	714	324	7584	0.000107147	5.71353	AKT3//APC2//BCL2L1//BCR//BID//BIRC2//BMP2//BMP4//CCND1//CCNE1//CDKN2B//CEBPA//CRK//CSF1R//CTNNA1//DAPK1//E2F3//EGLN3//EPAS1//FGF22//FGF23//FGFR1//FGFR2//FLT3//FOS//FZD7//GSK3B//IGF1//IGF1R//ITGA2//ITGA2B//ITGA6//ITGB1//LAMA5//LAMB1//LAMC1//MAPK3//MAX//MITF//NRAS//PDGFA//PDGFB//PDGFRB//PGF//PIK3CB//PPARG//PRKCA//PTK2//RAC1//RALB//RARB//SMO//TGFB1//TGFBR1//VEGFC//XIAP//ZBTB16
mmu04151	PI3K-Akt signaling pathway - Mus musculus (mouse)	http://www.genome.jp/kegg-bin/show_pathway?mmu04151+23797+11600+12048+12443+12445+12447+12842+12843+26427+12978+13636+13640+13685+13857+67112+64654+14182+14183+14697+14708+56637+16000+16001+16183+16184+16185+16189+16196+16398+16399+16403+16412+16416+192897+16419+16542+18048+16776+16777+226519+26417+18053+18127+18176+18590+18591+18596+18654+74769+263803+108079+18750+14083+19353+27380+21825+81877+2…	3.62782e-06	60	714	354	7584	0.000167484	5.44035	AKT3//ANGPT1//BCL2L1//CCND1//CCND3//CCNE1//COL1A1//COL1A2//CREB3L1//CSF1R//EFNA1//EFNA5//EIF4EBP1//EPOR//FGF22//FGF23//FGFR1//FGFR2//GNB5//GNG7//GSK3B//IGF1//IGF1R//IL2//IL2RA//IL2RB//IL4//IL7//ITGA2//ITGA2B//ITGA6//ITGB1//ITGB3//ITGB4//ITGB5//KDR//KLK1B4//LAMA5//LAMB1//LAMC1//MAPK3//NGFR//NOS3//NRAS//PDGFA//PDGFB//PDGFRB//PGF//PIK3CB//PKN3//PRKAA2//PRKCA//PTK2//RAC1//TCL1B4//THBS1//TNXB//VEGFC//…
mmu04972	Pancreatic secretion - Mus musculus (mouse)	http://www.genome.jp/kegg-bin/show_pathway?mmu04972+224129+11512+11515+232975+53313+11941+12722+80797+232680+66473+14682+16439+16531+26565+66350+18795+18797+18798+18750+53869+80718+19353+20496+20535+22063	9.67495e-06	25	714	105	7584	0.000347925	5.01435	ADCY5//ADCY6//ADCY9//ATP1A3//ATP2A3//ATP2B2//CLCA1//CLCA2//CPA2//CTRB1//GNAQ//ITPR2//KCNMA1//PLA2G10//PLA2G12A//PLCB1//PLCB3//PLCB4//PRKCA//RAB11A//RAB27B//RAC1//SLC12A2//SLC4A2//TRPC1
mmu04512	ECM-receptor interaction - Mus musculus (mouse)	http://www.genome.jp/kegg-bin/show_pathway?mmu04512+12491+12505+12842+12843+14723+14724+14729+243816+54368+16398+16399+16403+16412+16416+192897+16419+16776+16777+226519+21825+81877+22371	1.18496e-05	22	714	87	7584	0.000347925	4.92629	CD36//CD44//COL1A1//COL1A2//GP1BA//GP1BB//GP5//GP6//GP9//ITGA2//ITGA2B//ITGA6//ITGB1//ITGB3//ITGB4//ITGB5//LAMA5//LAMB1//LAMC1//THBS1//TNXB//VWF
mmu03320	PPAR signaling pathway - Mus musculus (mouse)	http://www.genome.jp/kegg-bin/show_pathway?mmu03320+94180+57875+11807+11814+12491+12894+12896+13117+666168+11770+56473+16202+16956+108078+18830+19013+19016+26457+26458+26569+20411	1.23194e-05	21	714	81	7584	0.000347925	4.90941	ACSBG1//ANGPTL4//APOA2//APOC3//CD36//CPT1A//CPT2//CYP4A10//CYP4A31//FABP4//FADS2//ILK//LPL//OLR1//PLTP//PPARA//PPARG//SLC27A1//SLC27A2//SLC27A4//SORBS1
mmu04520	Adherens junction - Mus musculus (mouse)	http://www.genome.jp/kegg-bin/show_pathway?mmu04520+60595+12385+12388+14158+14182+16001+26417+18099+93742+19246+19271+58235+19353+20411+99167+21812+21872+22330+83767+22612	1.25605e-05	20	714	75	7584	0.000347925	4.90099	ACTN4//CTNNA1//CTNND1//FERT2//FGFR1//IGF1R//MAPK3//NLK//PARD3//PTPN1//PTPRJ//PVRL1//RAC1//SORBS1//SSX2IP//TGFBR1//TJP1//VCL//WASF1//YES1
mmu04014	Ras signaling pathway - Mus musculus (mouse)	http://www.genome.jp/kegg-bin/show_pathway?mmu04014+23797+11600+12048+12315+12978+13636+13640+67112+64654+14182+14183+14388+14697+14708+16000+16001+16542+18048+26417+17532+18015+18053+18176+18590+18591+18596+18654+74769+26565+66350+225845+18783+18750+19247+19353+64143+19414+19395+240168+233046+216148+22341	1.5946e-05	42	714	229	7584	0.000401549	4.79735	AKT3//ANGPT1//BCL2L1//CALM3//CSF1R//EFNA1//EFNA5//FGF22//FGF23//FGFR1//FGFR2//GAB1//GNB5//GNG7//IGF1//IGF1R//KDR//KLK1B4//MAPK3//MRAS//NF1//NGFR//NRAS//PDGFA//PDGFB//PDGFRB//PGF//PIK3CB//PLA2G10//PLA2G12A//PLA2G16//PLA2G4A//PRKCA//PTPN11//RAC1//RALB//RASA3//RASGRP2//RASGRP3//RASGRP4//SHC2//VEGFC
mmu05410	Hypertrophic cardiomyopathy (HCM) - Mus musculus (mouse)	http://www.genome.jp/kegg-bin/show_pathway?mmu05410+11421+12289+16000+16398+16399+16403+16412+16416+192897+16419+16905+17868+17888+17897+108079+108097+21803+22003+22004+326618+22138	2.73095e-05	21	714	85	7584	0.000630394	4.56369	ACE//CACNA1D//IGF1//ITGA2//ITGA2B//ITGA6//ITGB1//ITGB3//ITGB4//ITGB5//LMNA//MYBPC3//MYH6//MYL3//PRKAA2//PRKAB2//TGFB1//TPM1//TPM2//TPM4//TTN
mmu04730	Long-term depression - Mus musculus (mouse)	http://www.genome.jp/kegg-bin/show_pathway?mmu04730+14682+14687+53623+60596+54195+16000+16001+16439+17096+26417+18176+18783+18795+18797+18798+18750+20190	3.00714e-05	17	714	61	7584	0.000640752	4.52185	GNAQ//GNAZ//GRIA3//GUCY1A3//GUCY1B3//IGF1//IGF1R//ITPR2//LYN//MAPK3//NRAS//PLA2G4A//PLCB1//PLCB3//PLCB4//PRKCA//RYR1
mmu04640	Hematopoietic cell lineage - Mus musculus (mouse)	http://www.genome.jp/kegg-bin/show_pathway?mmu04640+12491+12505+12516+12978+13857+14129+14255+14723+14724+14729+54368+16184+16189+16192+16196+16398+16399+16403+16409+16416+233274	3.30001e-05	21	714	86	7584	0.000652931	4.48149	CD36//CD44//CD7//CSF1R//EPOR//FCGR1//FLT3//GP1BA//GP1BB//GP5//GP9//IL2RA//IL4//IL5RA//IL7//ITGA2//ITGA2B//ITGA6//ITGAM//ITGB3//SIGLECH
mmu04540	Gap junction - Mus musculus (mouse)	http://www.genome.jp/kegg-bin/show_pathway?mmu04540+224129+11512+11515+14682+60596+54195+16439+26417+18176+18590+18591+18596+18795+18797+18798+18750+21872+53857+545486+22151+73710	4.76606e-05	21	714	88	7584	0.000880133	4.32184	ADCY5//ADCY6//ADCY9//GNAQ//GUCY1A3//GUCY1B3//ITPR2//MAPK3//NRAS//PDGFA//PDGFB//PDGFRB//PLCB1//PLCB3//PLCB4//PRKCA//TJP1//TUBA8//TUBB1//TUBB2A//TUBB2B
mmu05414	Dilated cardiomyopathy - Mus musculus (mouse)	http://www.genome.jp/kegg-bin/show_pathway?mmu05414+224129+11512+11515+12289+16000+16398+16399+16403+16412+16416+192897+16419+16905+17868+17888+17897+21803+22003+22004+326618+22138	6.78787e-05	21	714	90	7584	0.00117452	4.16827	ADCY5//ADCY6//ADCY9//CACNA1D//IGF1//ITGA2//ITGA2B//ITGA6//ITGB1//ITGB3//ITGB4//ITGB5//LMNA//MYBPC3//MYH6//MYL3//TGFB1//TPM1//TPM2//TPM4//TTN
mmu05205	Proteoglycans in cancer - Mus musculus (mouse)	http://www.genome.jp/kegg-bin/show_pathway?mmu05205+23797+69632+12323+12443+12505+12512+12842+12843+13043+67112+64654+14182+14369+14388+15442+16000+16001+16398+16412+16416+16419+16439+16542+26417+17532+71950+18176+18569+74769+232807+18750+14083+19247+19353+19878+15529+319757+21803+21825+21859	7.20822e-05	40	714	228	7584	0.00117452	4.14217	AKT3//ARHGEF12//CAMK2B//CCND1//CD44//CD63//COL1A1//COL1A2//CTTN//FGF22//FGF23//FGFR1//FZD7//GAB1//HPSE//IGF1//IGF1R//ITGA2//ITGB1//ITGB3//ITGB5//ITPR2//KDR//MAPK3//MRAS//NANOG//NRAS//PDCD4//PIK3CB//PPP1R12C//PRKCA//PTK2//PTPN11//RAC1//ROCK2//SDC2//SMO//TGFB1//THBS1//TIMP3
mmu04713	Circadian entrainment - Mus musculus (mouse)	http://www.genome.jp/kegg-bin/show_pathway?mmu04713+224129+11512+11515+12289+12315+12323+14281+14682+14697+14708+53623+60596+54195+16521+26417+17773+70729+18795+18797+18798+18750+20190	0.000100269	22	714	99	7584	0.00154303	3.99883	ADCY5//ADCY6//ADCY9//CACNA1D//CALM3//CAMK2B//FOS//GNAQ//GNB5//GNG7//GRIA3//GUCY1A3//GUCY1B3//KCNJ5//MAPK3//MTNR1A//NOS1AP//PLCB1//PLCB3//PLCB4//PRKCA//RYR1
mmu04810	Regulation of actin cytoskeleton - Mus musculus (mouse)	http://www.genome.jp/kegg-bin/show_pathway?mmu04810+329165+60595+23805+69632+56443+12631+12928+13800+67112+64654+14182+14183+227753+16398+16399+16403+16409+16411+16412+16416+192897+16419+26417+17532+98932+107589+50884+18176+18590+18591+18596+74769+232807+14083+19353+19878+22330+83767	0.000113292	38	714	217	7584	0.00165168	3.9458	ABI2//ACTN4//APC2//ARHGEF12//ARPC1A//CFL1//CRK//ENAH//FGF22//FGF23//FGFR1//FGFR2//GSN//ITGA2//ITGA2B//ITGA6//ITGAM//ITGAX//ITGB1//ITGB3//ITGB4//ITGB5//MAPK3//MRAS//MYL9//MYLK//NCKAP1//NRAS//PDGFA//PDGFB//PDGFRB//PIK3CB//PPP1R12C//PTK2//RAC1//ROCK2//VCL//WASF1
mmu04970	Salivary secretion - Mus musculus (mouse)	http://www.genome.jp/kegg-bin/show_pathway?mmu04970+224129+11512+11515+11548+232975+11941+12315+14682+60596+54195+16439+16531+18795+18797+18798+18750+20496+20535	0.000215949	18	714	77	7584	0.0029909	3.66565	ADCY5//ADCY6//ADCY9//ADRA1B//ATP1A3//ATP2B2//CALM3//GNAQ//GUCY1A3//GUCY1B3//ITPR2//KCNMA1//PLCB1//PLCB3//PLCB4//PRKCA//SLC12A2//SLC4A2
mmu04062	Chemokine signaling pathway - Mus musculus (mouse)	http://www.genome.jp/kegg-bin/show_pathway?mmu04062+224129+11512+11515+23797+109689+56221+12777+12773+12928+13051+330122+20311+12766+14191+100504346+14697+14708+14773+56637+17096+26417+18176+93742+74769+18795+18797+18798+57349+14083+19353+19395+19878+216148+23832	0.000279541	34	714	195	7584	0.00368727	3.55356	ADCY5//ADCY6//ADCY9//AKT3//ARRB1//CCL24//CCR10//CCR4//CRK//CX3CR1//CXCL3//CXCL5//CXCR3//FGR//GM13304//GNB5//GNG7//GRK5//GSK3B//LYN//MAPK3//NRAS//PARD3//PIK3CB//PLCB1//PLCB3//PLCB4//PPBP//PTK2//RAC1//RASGRP2//ROCK2//SHC2//XCR1
mmu05222	Small cell lung cancer - Mus musculus (mouse)	http://www.genome.jp/kegg-bin/show_pathway?mmu05222+23797+12048+11797+12443+12447+12579+13557+16398+16399+16403+16412+16776+16777+226519+17187+74769+14083+218772+11798	0.000318187	19	714	86	7584	0.00400627	3.49732	AKT3//BCL2L1//BIRC2//CCND1//CCNE1//CDKN2B//E2F3//ITGA2//ITGA2B//ITGA6//ITGB1//LAMA5//LAMB1//LAMC1//MAX//PIK3CB//PTK2//RARB//XIAP
mmu05100	Bacterial invasion of epithelial cells - Mus musculus (mouse)	http://www.genome.jp/kegg-bin/show_pathway?mmu05100+78514+56443+12928+12385+13043+13429+14388+16202+16412+74769+14083+19353+18000+20362+216148+22330+83767	0.000653787	17	714	77	7584	0.00760883	3.18456	ARHGAP10//ARPC1A//CRK//CTNNA1//CTTN//DNM1//GAB1//ILK//ITGB1//PIK3CB//PTK2//RAC1//SEPT2//SEPT8//SHC2//VCL//WASF1
mmu04060	Cytokine-cytokine receptor interaction - Mus musculus (mouse)	http://www.genome.jp/kegg-bin/show_pathway?mmu04060+11481+12156+12159+12162+12166+56221+12777+12773+12978+13051+330122+20311+12766+13857+14255+100504346+16168+16182+16183+16184+16185+16189+16192+16196+16542+16847+16880+17480+18053+18590+18591+18596+57349+21803+21812+21934+21938+22035+21943+22164+22341+23832	0.000659248	42	714	269	7584	0.00760883	3.18095	ACVR2B//BMP2//BMP4//BMP7//BMPR1A//CCL24//CCR10//CCR4//CSF1R//CX3CR1//CXCL3//CXCL5//CXCR3//EPOR//FLT3//GM13304//IL15//IL18R1//IL2//IL2RA//IL2RB//IL4//IL5RA//IL7//KDR//LEPR//LIFR//MPL//NGFR//PDGFA//PDGFB//PDGFRB//PPBP//TGFB1//TGFBR1//TNFRSF11A//TNFRSF1B//TNFSF10//TNFSF11//TNFSF4//VEGFC//XCR1
mmu05214	Glioma - Mus musculus (mouse)	http://www.genome.jp/kegg-bin/show_pathway?mmu05214+23797+12315+12323+12443+13557+16000+16001+26417+18176+18590+18591+18596+74769+18750+216148	0.000974122	15	714	66	7584	0.0107933	3.01139	AKT3//CALM3//CAMK2B//CCND1//E2F3//IGF1//IGF1R//MAPK3//NRAS//PDGFA//PDGFB//PDGFRB//PIK3CB//PRKCA//SHC2
mmu05034	Alcoholism - Mus musculus (mouse)	http://www.genome.jp/kegg-bin/show_pathway?mmu05034+224129+12315+207565+26427+13195+14697+14708+232440+404634+319164+319173+319168+319169+319177+319179+319181+319186+319155+319156+319158+319160+100041230+319192+319176+319189+97122+320332+26417+109648+18176+216148+214084+21823	0.00102493	33	714	201	7584	0.0109194	2.98931	ADCY5//CALM3//CAMKK2//CREB3L1//DDC//GNB5//GNG7//H2AFJ//H2AFY2//HIST1H2AC//HIST1H2AF//HIST1H2AH//HIST1H2AK//HIST1H2BA//HIST1H2BE//HIST1H2BG//HIST1H2BM//HIST1H4C//HIST1H4D//HIST1H4I//HIST1H4K//HIST1H4M//HIST2H2AA2//HIST2H2AC//HIST2H2BB//HIST2H4//HIST4H4//MAPK3//NPY//NRAS//SHC2//SLC18A2//TH
mmu04666	Fc gamma R-mediated phagocytosis - Mus musculus (mouse)	http://www.genome.jp/kegg-bin/show_pathway?mmu04666+23797+56443+13196+211914+12631+12928+14129+227753+16331+17096+26417+17118+74769+18783+67916+18750+19353+83767	0.00136475	18	714	89	7584	0.0140013	2.86495	AKT3//ARPC1A//ASAP1//ASAP2//CFL1//CRK//FCGR1//GSN//INPP5D//LYN//MAPK3//MARCKS//PIK3CB//PLA2G4A//PPAP2B//PRKCA//RAC1//WASF1
mmu04915	Estrogen signaling pathway - Mus musculus (mouse)	http://www.genome.jp/kegg-bin/show_pathway?mmu04915+224129+11512+11515+23797+12315+26427+14281+14682+16439+16521+26417+18127+18176+18390+74769+18795+18797+18798+216148	0.00171773	19	714	98	7584	0.0169932	2.76505	ADCY5//ADCY6//ADCY9//AKT3//CALM3//CREB3L1//FOS//GNAQ//ITPR2//KCNJ5//MAPK3//NOS3//NRAS//OPRM1//PIK3CB//PLCB1//PLCB3//PLCB4//SHC2
mmu04360	Axon guidance - Mus musculus (mouse)	http://www.genome.jp/kegg-bin/show_pathway?mmu04360+319713+69632+12631+13636+13640+13838+56637+16412+26417+17974+18176+18844+243743+140570+140571+14083+19353+50780+19878+20360+20563+14270+259302	0.00192775	23	714	129	7584	0.018184	2.71495	ABLIM3//ARHGEF12//CFL1//EFNA1//EFNA5//EPHA4//GSK3B//ITGB1//MAPK3//NCK2//NRAS//PLXNA1//PLXNA4//PLXNB2//PLXNB3//PTK2//RAC1//RGS3//ROCK2//SEMA6C//SLIT2//SRGAP2//SRGAP3
mmu04725	Cholinergic synapse - Mus musculus (mouse)	http://www.genome.jp/kegg-bin/show_pathway?mmu04725+224129+11512+11515+23797+12289+12323+11440+26427+14281+14682+14697+14708+16439+60613+26417+18176+74769+18795+18797+18798+18750	0.00196938	21	714	114	7584	0.018184	2.70567	ADCY5//ADCY6//ADCY9//AKT3//CACNA1D//CAMK2B//CHRNA6//CREB3L1//FOS//GNAQ//GNB5//GNG7//ITPR2//KCNQ4//MAPK3//NRAS//PIK3CB//PLCB1//PLCB3//PLCB4//PRKCA
mmu04724	Glutamatergic synapse - Mus musculus (mouse)	http://www.genome.jp/kegg-bin/show_pathway?mmu04724+224129+11512+11515+12289+14660+14645+14682+14697+14708+53623+108068+26558+16439+26417+18783+18795+18797+18798+18750+243961+22063	0.00220217	21	714	115	7584	0.0196774	2.65715	ADCY5//ADCY6//ADCY9//CACNA1D//GLS//GLUL//GNAQ//GNB5//GNG7//GRIA3//GRM2//HOMER3//ITPR2//MAPK3//PLA2G4A//PLCB1//PLCB3//PLCB4//PRKCA//SHANK1//TRPC1
mmu05218	Melanoma - Mus musculus (mouse)	http://www.genome.jp/kegg-bin/show_pathway?mmu05218+23797+12443+13557+67112+64654+14182+16000+16001+26417+17342+18176+18590+18591+18596+74769	0.00246406	15	714	72	7584	0.0213296	2.60835	AKT3//CCND1//E2F3//FGF22//FGF23//FGFR1//IGF1//IGF1R//MAPK3//MITF//NRAS//PDGFA//PDGFB//PDGFRB//PIK3CB
mmu04911	Insulin secretion - Mus musculus (mouse)	http://www.genome.jp/kegg-bin/show_pathway?mmu04911+20927+224129+11512+11515+232975+12289+12323+26427+14682+16531+140493+18795+18797+18798+18750+20619+20614	0.00270125	17	714	87	7584	0.0226742	2.56843	ABCC8//ADCY5//ADCY6//ADCY9//ATP1A3//CACNA1D//CAMK2B//CREB3L1//GNAQ//KCNMA1//KCNN3//PLCB1//PLCB3//PLCB4//PRKCA//SNAP23//SNAP25
mmu04728	Dopaminergic synapse - Mus musculus (mouse)	http://www.genome.jp/kegg-bin/show_pathway?mmu04728+224129+23797+12289+12315+12323+26427+13195+14281+14682+14697+14708+53623+56637+16439+16521+16572+16574+18795+18797+18798+18750+214084+21823	0.00319928	23	714	134	7584	0.0260647	2.49495	ADCY5//AKT3//CACNA1D//CALM3//CAMK2B//CREB3L1//DDC//FOS//GNAQ//GNB5//GNG7//GRIA3//GSK3B//ITPR2//KCNJ5//KIF5A//KIF5C//PLCB1//PLCB3//PLCB4//PRKCA//SLC18A2//TH
mmu04910	Insulin signaling pathway - Mus musculus (mouse)	http://www.genome.jp/kegg-bin/show_pathway?mmu04910+23797+12315+12928+13685+14121+56637+15275+15277+26417+18176+54611+110094+74769+228966+108079+108097+19088+19246+110078+19309+104215+216148+216233+20411	0.0035585	24	714	143	7584	0.028163	2.44873	AKT3//CALM3//CRK//EIF4EBP1//FBP1//GSK3B//HK1//HK2//MAPK3//NRAS//PDE3A//PHKA2//PIK3CB//PPP1R3D//PRKAA2//PRKAB2//PRKAR2B//PTPN1//PYGB//PYGM//RHOQ//SHC2//SOCS2//SORBS1
mmu04066	HIF-1 signaling pathway - Mus musculus (mouse)	http://www.genome.jp/kegg-bin/show_pathway?mmu04066+23797+11600+12323+112407+13685+13808+15275+15277+15368+16000+16001+26417+18127+230899+170768+270198+74769+18750+18787+22041	0.0040354	20	714	113	7584	0.0310501	2.39411	AKT3//ANGPT1//CAMK2B//EGLN3//EIF4EBP1//ENO3//HK1//HK2//HMOX1//IGF1//IGF1R//MAPK3//NOS3//NPPA//PFKFB3//PFKFB4//PIK3CB//PRKCA//SERPINE1//TRF
mmu04390	Hippo signaling pathway - Mus musculus (mouse)	http://www.genome.jp/kegg-bin/show_pathway?mmu04390+11576+23805+11797+12156+12159+12162+12166+12443+12445+12385+23859+53310+14369+56637+56217+93742+18787+56274+21676+21803+21812+22062+97064+22601+22629	0.00465264	25	714	154	7584	0.034832	2.3323	AFP//APC2//BIRC2//BMP2//BMP4//BMP7//BMPR1A//CCND1//CCND3//CTNNA1//DLG2//DLG3//FZD7//GSK3B//MPP5//PARD3//SERPINE1//STK3//TEAD1//TGFB1//TGFBR1//TRP73//WWTR1//YAP1//YWHAH
mmu05322	Systemic lupus erythematosus - Mus musculus (mouse)	http://www.genome.jp/kegg-bin/show_pathway?mmu05322+60595+69379+14129+232440+404634+319164+319173+319168+319169+319177+319179+319181+319186+319155+319156+319158+319160+100041230+319192+319176+319189+97122+320332+20822	0.00510325	24	714	147	7584	0.0372	2.29215	ACTN4//C8G//FCGR1//H2AFJ//H2AFY2//HIST1H2AC//HIST1H2AF//HIST1H2AH//HIST1H2AK//HIST1H2BA//HIST1H2BE//HIST1H2BG//HIST1H2BM//HIST1H4C//HIST1H4D//HIST1H4I//HIST1H4K//HIST1H4M//HIST2H2AA2//HIST2H2AC//HIST2H2BB//HIST2H4//HIST4H4//TROVE2
mmu04726	Serotonergic synapse - Mus musculus (mouse)	http://www.genome.jp/kegg-bin/show_pathway?mmu04726+224129+11684+11689+12289+226105+13195+14682+14697+14708+16439+16521+26417+18176+18783+18795+18797+18798+18750+19224+214084+15567+22063	0.00669616	22	714	134	7584	0.0475599	2.17417	ADCY5//ALOX12//ALOX5//CACNA1D//CYP2C70//DDC//GNAQ//GNB5//GNG7//ITPR2//KCNJ5//MAPK3//NRAS//PLA2G4A//PLCB1//PLCB3//PLCB4//PRKCA//PTGS1//SLC18A2//SLC6A4//TRPC1
mmu04010	MAPK signaling pathway - Mus musculus (mouse)	http://www.genome.jp/kegg-bin/show_pathway?mmu04010+23797+109689+12289+12928+72349+67112+64654+14182+14183+14281+13197+26397+71751+26408+53608+26417+17187+17532+18015+18099+18176+18590+18591+18596+18783+19043+18750+19259+19353+19395+240168+233046+56274+66513+21803+21812	0.00749353	36	714	253	7584	0.0518927	2.12531	AKT3//ARRB1//CACNA1D//CRK//DUSP3//FGF22//FGF23//FGFR1//FGFR2//FOS//GADD45A//MAP2K3//MAP3K13//MAP3K5//MAP3K6//MAPK3//MAX//MRAS//NF1//NLK//NRAS//PDGFA//PDGFB//PDGFRB//PLA2G4A//PPM1B//PRKCA//PTPN5//RAC1//RASGRP2//RASGRP3//RASGRP4//STK3//TAB1//TGFB1//TGFBR1
mmu05146	Amoebiasis - Mus musculus (mouse)	http://www.genome.jp/kegg-bin/show_pathway?mmu05146+60595+69379+12842+12843+14682+16409+16776+16777+226519+74769+18795+18797+18798+18750+14083+18788+20719+97848+21803+22330	0.00802113	20	714	120	7584	0.0522835	2.09576	ACTN4//C8G//COL1A1//COL1A2//GNAQ//ITGAM//LAMA5//LAMB1//LAMC1//PIK3CB//PLCB1//PLCB3//PLCB4//PRKCA//PTK2//SERPINB2//SERPINB6A//SERPINB6C//TGFB1//VCL
mmu04912	GnRH signaling pathway - Mus musculus (mouse)	http://www.genome.jp/kegg-bin/show_pathway?mmu04912+224129+11512+11515+12289+12315+12323+14682+16439+26397+26417+18176+18783+18795+18797+18798+18750	0.00822492	16	714	89	7584	0.0522835	2.08487	ADCY5//ADCY6//ADCY9//CACNA1D//CALM3//CAMK2B//GNAQ//ITPR2//MAP2K3//MAPK3//NRAS//PLA2G4A//PLCB1//PLCB3//PLCB4//PRKCA
mmu05215	Prostate cancer - Mus musculus (mouse)	http://www.genome.jp/kegg-bin/show_pathway?mmu05215+23797+12443+12447+26427+13557+14182+14183+56637+16000+16001+26417+18176+18590+18591+18596+74769	0.00822492	16	714	89	7584	0.0522835	2.08487	AKT3//CCND1//CCNE1//CREB3L1//E2F3//FGFR1//FGFR2//GSK3B//IGF1//IGF1R//MAPK3//NRAS//PDGFA//PDGFB//PDGFRB//PIK3CB
mmu04971	Gastric acid secretion - Mus musculus (mouse)	http://www.genome.jp/kegg-bin/show_pathway?mmu04971+224129+11512+11515+232975+12315+12323+14682+16439+107589+18795+18797+18798+18750+20535	0.00830496	14	714	74	7584	0.0522835	2.08066	ADCY5//ADCY6//ADCY9//ATP1A3//CALM3//CAMK2B//GNAQ//ITPR2//MYLK//PLCB1//PLCB3//PLCB4//PRKCA//SLC4A2
mmu04978	Mineral absorption - Mus musculus (mouse)	http://www.genome.jp/kegg-bin/show_pathway?mmu04978+11927+232975+14325+15368+17748+18174+22782+72027+22041+225997	0.00917862	10	714	46	7584	0.0564995	2.03722	ATOX1//ATP1A3//FTL1//HMOX1//MT1//SLC11A2//SLC30A1//SLC39A4//TRF//TRPM6
mmu04722	Neurotrophin signaling pathway - Mus musculus (mouse)	http://www.genome.jp/kegg-bin/show_pathway?mmu04722+23797+12315+12323+12928+14388+56637+108960+73914+26408+26417+17179+18053+18176+74769+19247+19353+16923+216148+20661+22062	0.0105034	20	714	123	7584	0.0632485	1.97867	AKT3//CALM3//CAMK2B//CRK//GAB1//GSK3B//IRAK2//IRAK3//MAP3K5//MAPK3//MATK//NGFR//NRAS//PIK3CB//PTPN11//RAC1//SH2B3//SHC2//SORT1//TRP73
mmu05162	Measles - Mus musculus (mouse)	http://www.genome.jp/kegg-bin/show_pathway?mmu05162+23797+12443+12445+12447+170786+170776+170779+170780+13448+56637+16183+16184+16185+16189+228607+23961+74769+27218+170743+81897+22035+22062	0.0111383	22	714	140	7584	0.0656448	1.95318	AKT3//CCND1//CCND3//CCNE1//CD209A//CD209C//CD209D//CD209E//DOK1//GSK3B//IL2//IL2RA//IL2RB//IL4//MAVS//OAS1B//PIK3CB//SLAMF1//TLR7//TLR9//TNFSF10//TRP73
mmu05032	Morphine addiction - Mus musculus (mouse)	http://www.genome.jp/kegg-bin/show_pathway?mmu05032+224129+11512+11515+109689+14408+14697+14708+14773+16521+18390+241489+18573+54611+18577+238871+18750	0.0124727	16	714	93	7584	0.0719777	1.90404	ADCY5//ADCY6//ADCY9//ARRB1//GABRR1//GNB5//GNG7//GRK5//KCNJ5//OPRM1//PDE11A//PDE1A//PDE3A//PDE4A//PDE4D//PRKCA
mmu04919	Thyroid hormone signaling pathway - Mus musculus (mouse)	http://www.genome.jp/kegg-bin/show_pathway?mmu04919+23797+232975+12159+12443+56637+16416+26417+19014+17888+17977+20185+18176+74769+18795+18797+18798+18750+58807+210789	0.0137413	19	714	118	7584	0.0750191	1.86197	AKT3//ATP1A3//BMP4//CCND1//GSK3B//ITGB3//MAPK3//MED1//MYH6//NCOA1//NCOR1//NRAS//PIK3CB//PLCB1//PLCB3//PLCB4//PRKCA//SLCO1C1//TBC1D4
mmu04261	Adrenergic signaling in cardiomyocytes - Mus musculus (mouse)	http://www.genome.jp/kegg-bin/show_pathway?mmu04261+224129+11512+11515+11548+23797+232975+11941+12289+12315+12323+26427+14682+26417+17888+17897+74769+18795+18797+18798+18750+22003+22004+326618	0.0137517	23	714	151	7584	0.0750191	1.86164	ADCY5//ADCY6//ADCY9//ADRA1B//AKT3//ATP1A3//ATP2B2//CACNA1D//CALM3//CAMK2B//CREB3L1//GNAQ//MAPK3//MYH6//MYL3//PIK3CB//PLCB1//PLCB3//PLCB4//PRKCA//TPM1//TPM2//TPM4
mmu04664	Fc epsilon RI signaling pathway - Mus musculus (mouse)	http://www.genome.jp/kegg-bin/show_pathway?mmu04664+23797+14127+16189+16331+16822+17096+26397+26417+18176+74769+18783+18750+19353	0.014083	13	714	71	7584	0.0750191	1.8513	AKT3//FCER1G//IL4//INPP5D//LCP2//LYN//MAP2K3//MAPK3//NRAS//PIK3CB//PLA2G4A//PRKCA//RAC1
mmu04918	Thyroid hormone synthesis - Mus musculus (mouse)	http://www.genome.jp/kegg-bin/show_pathway?mmu04918+224129+11512+11515+232975+26427+14682+14782+16439+18795+18797+18798+18750+21819	0.014083	13	714	71	7584	0.0750191	1.8513	ADCY5//ADCY6//ADCY9//ATP1A3//CREB3L1//GNAQ//GSR//ITPR2//PLCB1//PLCB3//PLCB4//PRKCA//TG
mmu04723	Retrograde endocannabinoid signaling - Mus musculus (mouse)	http://www.genome.jp/kegg-bin/show_pathway?mmu04723+224129+11512+11515+12289+14408+14682+14697+14708+53623+16439+16521+26417+23945+18795+18797+18798+18750	0.016634	17	714	104	7584	0.086936	1.779	ADCY5//ADCY6//ADCY9//CACNA1D//GABRR1//GNAQ//GNB5//GNG7//GRIA3//ITPR2//KCNJ5//MAPK3//MGLL//PLCB1//PLCB3//PLCB4//PRKCA
mmu05202	Transcriptional misregulation in cancer - Mus musculus (mouse)	http://www.genome.jp/kegg-bin/show_pathway?mmu05202+12048+12053+18647+12606+12978+18612+14129+14247+14255+229593+53623+15446+16000+16001+16185+16409+17095+17187+17268+20185+18053+18514+18590+19016+14083+235320	0.0176251	26	714	180	7584	0.0904101	1.75387	BCL2L1//BCL6//CDK14//CEBPA//CSF1R//ETV4//FCGR1//FLI1//FLT3//GOLPH3L//GRIA3//HPGD//IGF1//IGF1R//IL2RB//ITGAM//LYL1//MAX//MEIS1//NCOR1//NGFR//PBX1//PDGFA//PPARG//PTK2//ZBTB16
mmu04070	Phosphatidylinositol signaling system - Mus musculus (mouse)	http://www.genome.jp/kegg-bin/show_pathway?mmu04070+12315+74596+110911+380921+212111+16331+16439+84095+240752+74769+18795+18797+18798+18750	0.0180179	14	714	81	7584	0.0907445	1.7443	CALM3//CDS1//CDS2//DGKH//INPP5A//INPP5D//ITPR2//PI4K2A//PIK3C2B//PIK3CB//PLCB1//PLCB3//PLCB4//PRKCA
mmu05220	Chronic myeloid leukemia - Mus musculus (mouse)	http://www.genome.jp/kegg-bin/show_pathway?mmu05220+23797+12048+110279+12443+12928+13557+26417+18176+74769+19247+216148+21803+21812	0.0195549	13	714	74	7584	0.096727	1.70874	AKT3//BCL2L1//BCR//CCND1//CRK//E2F3//MAPK3//NRAS//PIK3CB//PTPN11//SHC2//TGFB1//TGFBR1
mmu04350	TGF-beta signaling pathway - Mus musculus (mouse)	http://www.genome.jp/kegg-bin/show_pathway?mmu04350+11481+12156+12159+12162+12166+12579+14313+13590+268977+26417+17129+21803+21812+21825	0.019916	14	714	82	7584	0.0967846	1.7008	ACVR2B//BMP2//BMP4//BMP7//BMPR1A//CDKN2B//FST//LEFTY1//LTBP1//MAPK3//SMAD5//TGFB1//TGFBR1//THBS1
mmu04142	Lysosome - Mus musculus (mouse)	http://www.genome.jp/kegg-bin/show_pathway?mmu04142+108012+11778+11975+12512+12752+211286+13033+13041+64138+56629+50917+260302+214505+15211+15932+16784+18174+235504+20661	0.0207267	19	714	123	7584	0.0987012	1.68347	AP1S2//AP3S2//ATP6V0A1//CD63//CLN3//CLN5//CTSD//CTSW//CTSZ//DNASE2B//GALNS//GGA3//GNPTG//HEXA//IDUA//LAMP2//SLC11A2//SLC17A5//SORT1
mmu05211	Renal cell carcinoma - Mus musculus (mouse)	http://www.genome.jp/kegg-bin/show_pathway?mmu05211+23797+12928+112407+13819+14388+26417+18176+18591+74769+19247+19353+21803	0.0211323	12	714	67	7584	0.0987012	1.67505	AKT3//CRK//EGLN3//EPAS1//GAB1//MAPK3//NRAS//PDGFB//PIK3CB//PTPN11//RAC1//TGFB1
mmu04020	Calcium signaling pathway - Mus musculus (mouse)	http://www.genome.jp/kegg-bin/show_pathway?mmu04020+11515+11548+53313+11941+12289+12315+12323+58861+70086+14682+16439+107589+18127+18436+18573+18596+110094+18795+18797+18798+105675+18750+19218+20190+110893+21337	0.0213793	26	714	183	7584	0.0987012	1.67001	ADCY9//ADRA1B//ATP2A3//ATP2B2//CACNA1D//CALM3//CAMK2B//CYSLTR1//CYSLTR2//GNAQ//ITPR2//MYLK//NOS3//P2RX1//PDE1A//PDGFRB//PHKA2//PLCB1//PLCB3//PLCB4//PPIF//PRKCA//PTGER3//RYR1//SLC8A3//TACR2
mmu04370	VEGF signaling pathway - Mus musculus (mouse)	http://www.genome.jp/kegg-bin/show_pathway?mmu04370+23797+16542+26417+18127+18176+74769+18783+18750+14083+19353+216148	0.0227053	11	714	60	7584	0.103104	1.64387	AKT3//KDR//MAPK3//NOS3//NRAS//PIK3CB//PLA2G4A//PRKCA//PTK2//RAC1//SHC2
mmu04916	Melanogenesis - Mus musculus (mouse)	http://www.genome.jp/kegg-bin/show_pathway?mmu04916+224129+11512+11515+12315+12323+26427+14369+14682+56637+26417+17342+18176+18795+18797+18798+18750	0.0238386	16	714	100	7584	0.106505	1.62272	ADCY5//ADCY6//ADCY9//CALM3//CAMK2B//CREB3L1//FZD7//GNAQ//GSK3B//MAPK3//MITF//NRAS//PLCB1//PLCB3//PLCB4//PRKCA
mmu04514	Cell adhesion molecules (CAMs) - Mus musculus (mouse)	http://www.genome.jp/kegg-bin/show_pathway?mmu04514+54725+225825+12562+242653+12805+53321+69524+16456+15042+16403+16409+16412+17136+18007+245537+319504+18190+18566+18613+58235+15529+20344+20612	0.025868	23	714	160	7584	0.112492	1.58724	CADM1//CD226//CDH5//CLDN19//CNTN1//CNTNAP1//ESAM//F11R//H2-T24//ITGA6//ITGAM//ITGB1//MAG//NEO1//NLGN3//NRCAM//NRXN2//PDCD1//PECAM1//PVRL1//SDC2//SELP//SIGLEC1
mmu00590	Arachidonic acid metabolism - Mus musculus (mouse)	http://www.genome.jp/kegg-bin/show_pathway?mmu00590+11684+11689+13088+226105+13117+666168+72054+26565+66350+225845+18783+64292+19223+19224+21391	0.0263215	15	714	93	7584	0.112492	1.57969	ALOX12//ALOX5//CYP2B10//CYP2C70//CYP4A10//CYP4A31//CYP4F18//PLA2G10//PLA2G12A//PLA2G16//PLA2G4A//PTGES//PTGIS//PTGS1//TBXAS1
mmu00051	Fructose and mannose metabolism - Mus musculus (mouse)	http://www.genome.jp/kegg-bin/show_pathway?mmu00051+14121+15275+15277+53332+170768+270198+20322+21991	0.026397	8	714	39	7584	0.112492	1.57845	FBP1//HK1//HK2//MTMR1//PFKFB3//PFKFB4//SORD//TPI1
mmu05144	Malaria - Mus musculus (mouse)	http://www.genome.jp/kegg-bin/show_pathway?mmu05144+12491+12520+13349+16971+18613+15529+20344+21803+21825+81897	0.0272892	10	714	54	7584	0.114532	1.56401	CD36//CD81//DARC//LRP1//PECAM1//SDC2//SELP//TGFB1//THBS1//TLR9
mmu04012	ErbB signaling pathway - Mus musculus (mouse)	http://www.genome.jp/kegg-bin/show_pathway?mmu04012+23797+12323+12928+13685+14388+56637+26417+17974+18176+83961+74769+18750+14083+216148	0.0317395	14	714	87	7584	0.130352	1.4984	AKT3//CAMK2B//CRK//EIF4EBP1//GAB1//GSK3B//MAPK3//NCK2//NRAS//NRG4//PIK3CB//PRKCA//PTK2//SHC2
mmu04920	Adipocytokine signaling pathway - Mus musculus (mouse)	http://www.genome.jp/kegg-bin/show_pathway?mmu04920+94180+23797+207565+12491+12894+16847+109648+19013+108079+108097+19247+21938	0.0319998	12	714	71	7584	0.130352	1.49485	ACSBG1//AKT3//CAMKK2//CD36//CPT1A//LEPR//NPY//PPARA//PRKAA2//PRKAB2//PTPN11//TNFRSF1B
mmu04670	Leukocyte transendothelial migration - Mus musculus (mouse)	http://www.genome.jp/kegg-bin/show_pathway?mmu04670+60595+12562+242653+12385+12388+69524+16456+16409+16412+98932+18613+74769+18750+14083+19247+19353+19878+22330	0.0335807	18	714	121	7584	0.134809	1.47391	ACTN4//CDH5//CLDN19//CTNNA1//CTNND1//ESAM//F11R//ITGAM//ITGB1//MYL9//PECAM1//PIK3CB//PRKCA//PTK2//PTPN11//RAC1//ROCK2//VCL
mmu00532	Glycosaminoglycan biosynthesis - chondroitin sulfate / dermatan sulfate - Mus musculus (mouse)	http://www.genome.jp/kegg-bin/show_pathway?mmu00532+100910+58250+59031+60322+234356	0.0342597	5	714	20	7584	0.13557	1.46522	CHPF2//CHST11//CHST12//CHST7//CSGALNACT1
mmu00564	Glycerophospholipid metabolism - Mus musculus (mouse)	http://www.genome.jp/kegg-bin/show_pathway?mmu00564+74596+110911+380921+215456+14555+64898+77582+236899+18618+26565+66350+225845+18783+67916	0.040917	14	714	90	7584	0.156725	1.3881	CDS1//CDS2//DGKH//GPAT2//GPD1//LPIN2//MBOAT7//PCYT1B//PEMT//PLA2G10//PLA2G12A//PLA2G16//PLA2G4A//PPAP2B
mmu04727	GABAergic synapse - Mus musculus (mouse)	http://www.genome.jp/kegg-bin/show_pathway?mmu04727+268860+224129+11512+11515+12289+57436+14408+14415+14660+14645+14697+14708+18750+57138	0.040917	14	714	90	7584	0.156725	1.3881	ABAT//ADCY5//ADCY6//ADCY9//CACNA1D//GABARAPL1//GABRR1//GAD1//GLS//GLUL//GNB5//GNG7//PRKCA//SLC12A5
mmu00531	Glycosaminoglycan degradation - Mus musculus (mouse)	http://www.genome.jp/kegg-bin/show_pathway?mmu00531+50917+15211+15442+15587+15932	0.0415977	5	714	21	7584	0.156725	1.38093	GALNS//HEXA//HPSE//HYAL2//IDUA
mmu04662	B cell receptor signaling pathway - Mus musculus (mouse)	http://www.genome.jp/kegg-bin/show_pathway?mmu04662+23797+12520+26377+14281+56637+16331+17096+26417+18176+74769+19353+240168	0.0424346	12	714	74	7584	0.156725	1.37228	AKT3//CD81//DAPP1//FOS//GSK3B//INPP5D//LYN//MAPK3//NRAS//PIK3CB//RAC1//RASGRP3
mmu04917	Prolactin signaling pathway - Mus musculus (mouse)	http://www.genome.jp/kegg-bin/show_pathway?mmu04917+23797+12443+14281+56637+26417+18176+74769+216148+216233+21823+21934+21943	0.0424346	12	714	74	7584	0.156725	1.37228	AKT3//CCND1//FOS//GSK3B//MAPK3//NRAS//PIK3CB//SHC2//SOCS2//TH//TNFRSF11A//TNFSF11
mmu05031	Amphetamine addiction - Mus musculus (mouse)	http://www.genome.jp/kegg-bin/show_pathway?mmu05031+224129+12289+12315+12323+26427+13195+14281+53623+18750+214084+21823	0.0469396	11	714	67	7584	0.170669	1.32846	ADCY5//CACNA1D//CALM3//CAMK2B//CREB3L1//DDC//FOS//GRIA3//PRKCA//SLC18A2//TH
mmu04380	Osteoclast differentiation - Mus musculus (mouse)	http://www.genome.jp/kegg-bin/show_pathway?mmu04380+23797+12978+14129+14281+16416+16822+26417+17342+232790+74769+19016+19353+66513+21803+21812+21934+21943+83433	0.0474423	18	714	126	7584	0.170669	1.32383	AKT3//CSF1R//FCGR1//FOS//ITGB3//LCP2//MAPK3//MITF//OSCAR//PIK3CB//PPARG//RAC1//TAB1//TGFB1//TGFBR1//TNFRSF11A//TNFSF11//TREM2
mmu04068	FoxO signaling pathway - Mus musculus (mouse)	http://www.genome.jp/kegg-bin/show_pathway?mmu04068+23797+12053+12359+12443+12579+57436+13197+26558+16000+16001+26417+18099+18176+74769+108079+108097+21803+21812+22035	0.048363	19	714	135	7584	0.171751	1.31549	AKT3//BCL6//CAT//CCND1//CDKN2B//GABARAPL1//GADD45A//HOMER3//IGF1//IGF1R//MAPK3//NLK//NRAS//PIK3CB//PRKAA2//PRKAB2//TGFB1//TGFBR1//TNFSF10

## Sheet: INH vs Water_up-regulated
PathwayID	Definition	OriginalWebSite	Fisher-Pvalue	SelectionCounts	SelectionSize	Count	Size	FDR	Enrichment_Score	Genes
mmu04961	Endocrine and other factor-regulated calcium reabsorption - Mus musculus (mouse)	http://www.genome.jp/kegg-bin/show_pathway?mmu04961+71770+67972+13429+16612+16617+16618+18050+16622+16624+18751+20541+22337	8.07538e-05	12	457	55	7584	0.0223688	4.09284	AP2B1//ATP2B1//DNM1//KLK1//KLK1B24//KLK1B26//KLK1B3//KLK1B5//KLK1B8//PRKCB//SLC8A1//VDR
mmu04360	Axon guidance - Mus musculus (mouse)	http://www.genome.jp/kegg-bin/show_pathway?mmu04360+13176+65254+13636+13637+13642+13838+13839+13845+18019+70584+20352+20353+20356+20360+214968+20361+20563+14270+259302	0.000240995	19	457	129	7584	0.0333778	3.61799	DCC//DPYSL5//EFNA1//EFNA2//EFNB2//EPHA4//EPHA5//EPHB3//NFATC2//PAK4//SEMA4B//SEMA4C//SEMA5A//SEMA6C//SEMA6D//SEMA7A//SLIT2//SRGAP2//SRGAP3
mmu04970	Salivary secretion - Mus musculus (mouse)	http://www.genome.jp/kegg-bin/show_pathway?mmu04970+224129+11513+11548+11554+67972+11941+70405+12945+16440+16531+17110+18751+20192	0.000615191	13	457	77	7584	0.0568026	3.21099	ADCY5//ADCY7//ADRA1B//ADRB1//ATP2B1//ATP2B2//CALML3//DMBT1//ITPR3//KCNMA1//LYZ1//PRKCB//RYR3
mmu04015	Rap1 signaling pathway - Mus musculus (mouse)	http://www.genome.jp/kegg-bin/show_pathway?mmu04015+224129+11513+11540+12927+70405+12978+13489+13636+13637+14169+67112+64654+14182+14186+16001+16409+18591+18654+18751+18759+18762+75292+110351+21844	0.00259251	24	457	216	7584	0.14531	2.58628	ADCY5//ADCY7//ADORA2A//BCAR1//CALML3//CSF1R//DRD2//EFNA1//EFNA2//FGF14//FGF22//FGF23//FGFR1//FGFR4//IGF1R//ITGAM//PDGFB//PGF//PRKCB//PRKCI//PRKCZ//PRKD3//RAP1GAP//TIAM1
mmu05202	Transcriptional misregulation in cancer - Mus musculus (mouse)	http://www.genome.jp/kegg-bin/show_pathway?mmu05202+11864+12580+12978+18612+14048+56458+15364+16001+16409+17132+17349+18109+18033+18124+18510+12393+20183+212980+70439+21912+22642	0.00262293	21	457	180	7584	0.14531	2.58121	ARNT2//CDKN2C//CSF1R//ETV4//EYA1//FOXO1//HMGA2//IGF1R//ITGAM//MAF//MLF1//MYCN//NFKB1//NR4A3//PAX8//RUNX2//RXRG//SLC45A3//TAF15//TSPAN7//ZBTB17
mmu04020	Calcium signaling pathway - Mus musculus (mouse)	http://www.genome.jp/kegg-bin/show_pathway?mmu04020+11513+11540+11548+11554+67972+11941+12289+54652+70405+12323+14680+16440+18127+18430+228139+18802+18751+20192+20541+110893+21337	0.00320347	21	457	183	7584	0.147894	2.49438	ADCY7//ADORA2A//ADRA1B//ADRB1//ATP2B1//ATP2B2//CACNA1D//CACNA1F//CALML3//CAMK2B//GNAL//ITPR3//NOS3//OXTR//P2RX3//PLCD4//PRKCB//RYR3//SLC8A1//SLC8A3//TACR2
mmu04120	Ubiquitin mediated proteolysis - Mus musculus (mouse)	http://www.genome.jp/kegg-bin/show_pathway?mmu04120+99152+56317+12234+66515+15204+17318+50873+69288+20438+69807+67128+22214+53323+77891+100763+140630+107568	0.00464033	17	457	141	7584	0.160941	2.33345	ANAPC2//ANAPC7//BTRC//CUL7//HERC2//MID1//PARK2//RHOBTB1//SIAH1B//TRIM32//UBE2G1//UBE2H//UBE2K//UBE2S//UBE3C//UBE4A//WWP1
mmu04919	Thyroid hormone signaling pathway - Mus musculus (mouse)	http://www.genome.jp/kegg-bin/show_pathway?mmu04919+12443+12914+56458+15183+19014+327987+26896+17888+18128+56421+18802+18751+20183+58807+210789	0.00464812	15	457	118	7584	0.160941	2.33272	CCND1//CREBBP//FOXO1//HDAC3//MED1//MED13//MED14//MYH6//NOTCH1//PFKP//PLCD4//PRKCB//RXRG//SLCO1C1//TBC1D4
mmu04270	Vascular smooth muscle contraction - Mus musculus (mouse)	http://www.genome.jp/kegg-bin/show_pathway?mmu04270+224129+11513+11535+11540+11548+12289+54652+70405+13614+16440+16531+230899+230103+19046+18751+56089	0.00803663	16	457	137	7584	0.24735	2.09493	ADCY5//ADCY7//ADM//ADORA2A//ADRA1B//CACNA1D//CACNA1F//CALML3//EDN1//ITPR3//KCNMA1//NPPA//NPR2//PPP1CB//PRKCB//RAMP3
mmu05032	Morphine addiction - Mus musculus (mouse)	http://www.genome.jp/kegg-bin/show_pathway?mmu05032+224129+11513+110355+54393+14706+14708+18390+207728+18577+110385+18584+18751	0.00961038	12	457	93	7584	0.266208	2.01726	ADCY5//ADCY7//ADRBK1//GABBR1//GNG4//GNG7//OPRM1//PDE2A//PDE4A//PDE4C//PDE8A//PRKCB
mmu04060	Cytokine-cytokine receptor interaction - Mus musculus (mouse)	http://www.genome.jp/kegg-bin/show_pathway?mmu04060+11480+12162+12166+12777+12773+12776+12803+12978+14825+20310+14103+100504346+16169+16177+16183+209590+16190+16195+16878+18591+19116+21933+29820+21942+21943+21950	0.0111111	26	457	269	7584	0.275151	1.95425	ACVR2A//BMP7//BMPR1A//CCR10//CCR4//CCR8//CNTF//CSF1R//CXCL1//CXCL2//FASL//GM13304//IL15RA//IL1R1//IL2//IL23R//IL4RA//IL6ST//LIF//PDGFB//PRLR//TNFRSF10B//TNFRSF19//TNFRSF9//TNFSF11//TNFSF9
mmu05200	Pathways in cancer - Mus musculus (mouse)	http://www.genome.jp/kegg-bin/show_pathway?mmu05200+11864+12006+12443+12830+12914+12978+13176+13819+14103+14169+67112+64654+14182+56458+14368+16001+16777+18033+18510+18591+18654+18751+19207+218772+19713+20183+319757+21415+22030+22031	0.0119199	30	457	324	7584	0.275151	1.92373	ARNT2//AXIN2//CCND1//COL4A5//CREBBP//CSF1R//DCC//EPAS1//FASL//FGF14//FGF22//FGF23//FGFR1//FOXO1//FZD6//IGF1R//LAMB1//NFKB1//PAX8//PDGFB//PGF//PRKCB//PTCH2//RARB//RET//RXRG//SMO//TCF7L1//TRAF2//TRAF3
mmu04728	Dopaminergic synapse - Mus musculus (mouse)	http://www.genome.jp/kegg-bin/show_pathway?mmu04728+224129+12289+70405+12323+12753+231991+13489+14680+14706+14708+16440+16574+19046+226849+18751	0.0145914	15	457	134	7584	0.281002	1.8359	ADCY5//CACNA1D//CALML3//CAMK2B//CLOCK//CREB5//DRD2//GNAL//GNG4//GNG7//ITPR3//KIF5C//PPP1CB//PPP2R5A//PRKCB
mmu04911	Insulin secretion - Mus musculus (mouse)	http://www.genome.jp/kegg-bin/show_pathway?mmu04911+224129+11513+12289+54652+12323+231991+16440+16531+26875+18751+20614	0.0148736	11	457	87	7584	0.281002	1.82759	ADCY5//ADCY7//CACNA1D//CACNA1F//CAMK2B//CREB5//ITPR3//KCNMA1//PCLO//PRKCB//SNAP25
mmu04114	Oocyte meiosis - Mus musculus (mouse)	http://www.genome.jp/kegg-bin/show_pathway?mmu04114+224129+11513+99152+56317+12234+70405+12323+16001+16440+56150+19046+226849+50878	0.016789	13	457	112	7584	0.281002	1.77497	ADCY5//ADCY7//ANAPC2//ANAPC7//BTRC//CALML3//CAMK2B//IGF1R//ITPR3//MAD2L1//PPP1CB//PPP2R5A//STAG3
mmu04727	GABAergic synapse - Mus musculus (mouse)	http://www.genome.jp/kegg-bin/show_pathway?mmu04727+224129+11513+12289+54652+54393+14660+14706+14708+18751+57138+70827	0.0188144	11	457	90	7584	0.281002	1.72551	ADCY5//ADCY7//CACNA1D//CACNA1F//GABBR1//GLS//GNG4//GNG7//PRKCB//SLC12A5//TRAK2
mmu05414	Dilated cardiomyopathy - Mus musculus (mouse)	http://www.genome.jp/kegg-bin/show_pathway?mmu05414+224129+11513+11554+12289+54652+56808+109700+16404+17888+20541+22138	0.0188144	11	457	90	7584	0.281002	1.72551	ADCY5//ADCY7//ADRB1//CACNA1D//CACNA1F//CACNA2D2//ITGA1//ITGA7//MYH6//SLC8A1//TTN
mmu04725	Cholinergic synapse - Mus musculus (mouse)	http://www.genome.jp/kegg-bin/show_pathway?mmu04725+224129+11513+12289+54652+12323+12647+11444+108015+231991+14706+14708+16440+18751	0.0192142	13	457	114	7584	0.281002	1.71638	ADCY5//ADCY7//CACNA1D//CACNA1F//CAMK2B//CHAT//CHRNB2//CHRNB4//CREB5//GNG4//GNG7//ITPR3//PRKCB
mmu04261	Adrenergic signaling in cardiomyocytes - Mus musculus (mouse)	http://www.genome.jp/kegg-bin/show_pathway?mmu04261+224129+11513+11548+11554+67972+11941+12289+54652+56808+70405+12323+231991+17888+19046+226849+20541	0.0192745	16	457	151	7584	0.281002	1.71502	ADCY5//ADCY7//ADRA1B//ADRB1//ATP2B1//ATP2B2//CACNA1D//CACNA1F//CACNA2D2//CALML3//CAMK2B//CREB5//MYH6//PPP1CB//PPP2R5A//SLC8A1
mmu04070	Phosphatidylinositol signaling system - Mus musculus (mouse)	http://www.genome.jp/kegg-bin/show_pathway?mmu04070+70405+227333+64436+75678+16440+84095+18705+18802+18751+20975	0.0229752	10	457	81	7584	0.318207	1.63874	CALML3//DGKD//INPP5E//IPPK//ITPR3//PI4K2A//PIK3C2G//PLCD4//PRKCB//SYNJ2
mmu05216	Thyroid cancer - Mus musculus (mouse)	http://www.genome.jp/kegg-bin/show_pathway?mmu05216+12443+18510+19713+20183+21415	0.0277903	5	457	29	7584	0.366567	1.55611	CCND1//PAX8//RET//RXRG//TCF7L1
mmu05410	Hypertrophic cardiomyopathy (HCM) - Mus musculus (mouse)	http://www.genome.jp/kegg-bin/show_pathway?mmu05410+12289+54652+56808+13614+109700+16404+17888+108099+20541+22138	0.0309674	10	457	85	7584	0.377217	1.50909	CACNA1D//CACNA1F//CACNA2D2//EDN1//ITGA1//ITGA7//MYH6//PRKAG2//SLC8A1//TTN
mmu04721	Synaptic vesicle cycle - Mus musculus (mouse)	http://www.genome.jp/kegg-bin/show_pathway?mmu04721+71770+68775+66144+66237+12890+13429+20614+22249	0.0315672	8	457	62	7584	0.377217	1.50076	AP2B1//ATP6V1C2//ATP6V1F//ATP6V1G2//CPLX2//DNM1//SNAP25//UNC13B
mmu04014	Ras signaling pathway - Mus musculus (mouse)	http://www.genome.jp/kegg-bin/show_pathway?mmu04014+70405+12978+13636+13637+14103+14169+67112+64654+14182+14186+14706+14708+16001+18033+70584+18591+18654+18751+19419+271849+21844	0.0351815	21	457	229	7584	0.377217	1.45369	CALML3//CSF1R//EFNA1//EFNA2//FASL//FGF14//FGF22//FGF23//FGFR1//FGFR4//GNG4//GNG7//IGF1R//NFKB1//PAK4//PDGFB//PGF//PRKCB//RASGRP1//SHC4//TIAM1
mmu04713	Circadian entrainment - Mus musculus (mouse)	http://www.genome.jp/kegg-bin/show_pathway?mmu04713+224129+11513+12289+70405+12323+14706+14708+16440+17773+18751+20192	0.03526	11	457	99	7584	0.377217	1.45272	ADCY5//ADCY7//CACNA1D//CALML3//CAMK2B//GNG4//GNG7//ITPR3//MTNR1A//PRKCB//RYR3
mmu04520	Adherens junction - Mus musculus (mouse)	http://www.genome.jp/kegg-bin/show_pathway?mmu04520+108100+12914+14182+16001+21415+21872+83767+73178+22612	0.0354066	9	457	75	7584	0.377217	1.45091	BAIAP2//CREBBP//FGFR1//IGF1R//TCF7L1//TJP1//WASF1//WASL//YES1
mmu04672	Intestinal immune network for IgA production - Mus musculus (mouse)	http://www.genome.jp/kegg-bin/show_pathway?mmu04672+12777+12487+54167+16169+16183+18703	0.0424905	6	457	43	7584	0.43429	1.37171	CCR10//CD28//ICOS//IL15RA//IL2//PIGR
mmu04390	Hippo signaling pathway - Mus musculus (mouse)	http://www.genome.jp/kegg-bin/show_pathway?mmu04390+12006+12162+12166+12234+12443+13383+14368+19046+18759+18762+21415+21676+21677+209456+22062	0.0441085	15	457	154	7584	0.43429	1.35548	AXIN2//BMP7//BMPR1A//BTRC//CCND1//DLG1//FZD6//PPP1CB//PRKCI//PRKCZ//TCF7L1//TEAD1//TEAD2//TRP53BP2//TRP73
mmu04062	Chemokine signaling pathway - Mus musculus (mouse)	http://www.genome.jp/kegg-bin/show_pathway?mmu04062+224129+11513+110355+12927+12777+12773+12776+14825+20310+100504346+14706+14708+18033+18751+18762+271849+21844+73178	0.0461474	18	457	195	7584	0.43429	1.33585	ADCY5//ADCY7//ADRBK1//BCAR1//CCR10//CCR4//CCR8//CXCL1//CXCL2//GM13304//GNG4//GNG7//NFKB1//PRKCB//PRKCZ//SHC4//TIAM1//WASL
mmu05031	Amphetamine addiction - Mus musculus (mouse)	http://www.genome.jp/kegg-bin/show_pathway?mmu05031+224129+12289+70405+12323+231991+14282+19046+18751	0.047035	8	457	67	7584	0.43429	1.32758	ADCY5//CACNA1D//CALML3//CAMK2B//CREB5//FOSB//PPP1CB//PRKCB

## Sheet: INH vs Water_down-regulated
PathwayID	Definition	OriginalWebSite	Fisher-Pvalue	SelectionCounts	SelectionSize	Count	Size	FDR	Enrichment_Score	Genes
mmu05322	Systemic lupus erythematosus - Mus musculus (mouse)	http://www.genome.jp/kegg-bin/show_pathway?mmu05322+12262+50909+12266+12268+13035+14129+246256+626150+14960+14998+15000+15001+232440+26914+319164+319173+319167+319168+319169+319170+319177+319186+319188+319148+260423+319155+319156+319158+319160+100041230+319192+319176+319154+97122+320332+15978+16061	8.64191e-11	37	594	147	7584	2.39381e-08	10.0634	C1QC//C1RA//C3//C4B//CTSG//FCGR1//FCGR4//GM12271//H2-AA//H2-DMA//H2-DMB2//H2-OA//H2AFJ//H2AFY//HIST1H2AC//HIST1H2AF//HIST1H2AG//HIST1H2AH//HIST1H2AK//HIST1H2AN//HIST1H2BA//HIST1H2BM//HIST1H2BP//HIST1H3C//HIST1H3F//HIST1H4C//HIST1H4D//HIST1H4I//HIST1H4K//HIST1H4M//HIST2H2AA2//HIST2H2AC//HIST2H3B//HIST2H4//HIST4H4//IFNG//IGH-VJ558
mmu04145	Phagosome - Mus musculus (mouse)	http://www.genome.jp/kegg-bin/show_pathway?mmu04145+11465+54411+11966+66237+50909+12266+12475+12491+56644+13057+235661+14129+14131+246256+14960+14963+14998+15000+14990+15001+15007+15013+15024+15042+15051+16061+16416+16784+17523+20288+17969+20333+66212+20335+21354+24088+21898+22145+545486	1.83023e-09	39	594	177	7584	2.53486e-07	8.73749	ACTG1//ATP6AP1//ATP6V1B2//ATP6V1G2//C1RA//C3//CD14//CD36//CLEC7A//CYBA//DYNC1LI1//FCGR1//FCGR3//FCGR4//H2-AA//H2-BL//H2-DMA//H2-DMB2//H2-M2//H2-OA//H2-Q10//H2-Q2//H2-T10//H2-T24//H2-T9//IGH-VJ558//ITGB3//LAMP2//MPO//MSR1//NCF1//SEC22B//SEC61B//SEC61G//TAP1//TLR2//TLR4//TUBA4A//TUBB1
mmu05140	Leishmaniasis - Mus musculus (mouse)	http://www.genome.jp/kegg-bin/show_pathway?mmu05140+12266+13057+14129+14131+246256+14960+14998+15000+15001+15978+16061+266632+26415+26417+17969+18126+15170+20846+24088+21898	7.26474e-08	20	594	66	7584	6.70778e-06	7.13878	C3//CYBA//FCGR1//FCGR3//FCGR4//H2-AA//H2-DMA//H2-DMB2//H2-OA//IFNG//IGH-VJ558//IRAK4//MAPK13//MAPK3//NCF1//NOS2//PTPN6//STAT1//TLR2//TLR4
mmu05150	Staphylococcus aureus infection - Mus musculus (mouse)	http://www.genome.jp/kegg-bin/show_pathway?mmu05150+12262+50909+12266+12268+14962+14129+14131+246256+14293+14289+14960+14998+15000+15001+15894+16061+16408	2.04909e-07	17	594	52	7584	1.26978e-05	6.68844	C1QC//C1RA//C3//C4B//CFB//FCGR1//FCGR3//FCGR4//FPR1//FPR2//H2-AA//H2-DMA//H2-DMB2//H2-OA//ICAM1//IGH-VJ558//ITGAL
mmu05034	Alcoholism - Mus musculus (mouse)	http://www.genome.jp/kegg-bin/show_pathway?mmu05034+11909+11911+12064+26427+626150+14683+14697+66066+14701+14710+232440+26914+79221+319164+319173+319167+319168+319169+319170+319177+319186+319188+319148+260423+319155+319156+319158+319160+100041230+319192+319176+319154+97122+320332+26417+109648+18212+19045	2.29202e-07	38	594	201	7584	1.26978e-05	6.63978	ATF2//ATF4//BDNF//CREB3L1//GM12271//GNAS//GNB5//GNG11//GNG12//GNGT2//H2AFJ//H2AFY//HDAC9//HIST1H2AC//HIST1H2AF//HIST1H2AG//HIST1H2AH//HIST1H2AK//HIST1H2AN//HIST1H2BA//HIST1H2BM//HIST1H2BP//HIST1H3C//HIST1H3F//HIST1H4C//HIST1H4D//HIST1H4I//HIST1H4K//HIST1H4M//HIST2H2AA2//HIST2H2AC//HIST2H3B//HIST2H4//HIST4H4//MAPK3//NPY//NTRK2//PPP1CA
mmu05416	Viral myocarditis - Mus musculus (mouse)	http://www.genome.jp/kegg-bin/show_pathway?mmu05416+11465+12122+12367+230861+14960+14963+14998+15000+14990+15001+15007+15013+15024+15042+15051+15894+16061+16408+18646	7.35889e-06	19	594	79	7584	0.000339735	5.13319	ACTG1//BID//CASP3//EIF4G3//H2-AA//H2-BL//H2-DMA//H2-DMB2//H2-M2//H2-OA//H2-Q10//H2-Q2//H2-T10//H2-T24//H2-T9//ICAM1//IGH-VJ558//ITGAL//PRF1
mmu05330	Allograft rejection - Mus musculus (mouse)	http://www.genome.jp/kegg-bin/show_pathway?mmu05330+14939+14960+14963+14998+15000+14990+15001+15007+15013+15024+15042+15051+15978+16061+18646	1.33466e-05	15	594	55	7584	0.000528144	4.87463	GZMB//H2-AA//H2-BL//H2-DMA//H2-DMB2//H2-M2//H2-OA//H2-Q10//H2-Q2//H2-T10//H2-T24//H2-T9//IFNG//IGH-VJ558//PRF1
mmu05320	Autoimmune thyroid disease - Mus musculus (mouse)	http://www.genome.jp/kegg-bin/show_pathway?mmu05320+14939+14960+14963+14998+15000+14990+15001+15007+15013+15024+15042+15051+15962+404549+16061+18646+21819	1.93492e-05	17	594	70	7584	0.000669965	4.71334	GZMB//H2-AA//H2-BL//H2-DMA//H2-DMB2//H2-M2//H2-OA//H2-Q10//H2-Q2//H2-T10//H2-T24//H2-T9//IFNA1//IFNA14//IGH-VJ558//PRF1//TG
mmu04650	Natural killer cell mediated cytotoxicity - Mus musculus (mouse)	http://www.genome.jp/kegg-bin/show_pathway?mmu04650+12122+12367+12503+14127+246256+14939+14963+14990+15007+15013+15024+15042+15051+15894+15962+404549+15976+15978+16061+16408+26396+26417+18479+30955+18646+15170+26904	2.26756e-05	27	594	147	7584	0.000697904	4.64444	BID//CASP3//CD247//FCER1G//FCGR4//GZMB//H2-BL//H2-M2//H2-Q10//H2-Q2//H2-T10//H2-T24//H2-T9//ICAM1//IFNA1//IFNA14//IFNAR2//IFNG//IGH-VJ558//ITGAL//MAP2K2//MAPK3//PAK1//PIK3CG//PRF1//PTPN6//SH2D1B1
mmu04612	Antigen processing and presentation - Mus musculus (mouse)	http://www.genome.jp/kegg-bin/show_pathway?mmu04612+16149+12525+14960+14963+14998+15000+14990+15001+15007+15013+15024+15042+15051+65972+15978+14827+19186+21354	3.37987e-05	18	594	80	7584	0.000936223	4.4711	CD74//CD8A//H2-AA//H2-BL//H2-DMA//H2-DMB2//H2-M2//H2-OA//H2-Q10//H2-Q2//H2-T10//H2-T24//H2-T9//IFI30//IFNG//PDIA3//PSME1//TAP1
mmu05152	Tuberculosis - Mus musculus (mouse)	http://www.genome.jp/kegg-bin/show_pathway?mmu05152+54411+12122+12266+12796+332579+12367+12475+16149+56644+13033+14127+14129+14131+246256+14960+14998+15000+15001+15962+404549+15978+16061+266632+16784+26415+26417+18126+20846+24088+21898	4.03744e-05	30	594	177	7584	0.0010167	4.39389	ATP6AP1//BID//C3//CAMP//CARD9//CASP3//CD14//CD74//CLEC7A//CTSD//FCER1G//FCGR1//FCGR3//FCGR4//H2-AA//H2-DMA//H2-DMB2//H2-OA//IFNA1//IFNA14//IFNG//IGH-VJ558//IRAK4//LAMP2//MAPK13//MAPK3//NOS2//STAT1//TLR2//TLR4
mmu04066	HIF-1 signaling pathway - Mus musculus (mouse)	http://www.genome.jp/kegg-bin/show_pathway?mmu04066+11674+13808+14254+14433+15275+212032+15368+15978+16000+16194+16828+17000+26396+26417+18126+18655+30955+58988+20848+67673+21898+22041	5.17951e-05	22	594	113	7584	0.0011956	4.28571	ALDOA//ENO3//FLT1//GAPDH//HK1//HK3//HMOX1//IFNG//IGF1//IL6RA//LDHA//LTBR//MAP2K2//MAPK3//NOS2//PGK1//PIK3CG//RPS6KB2//STAT3//TCEB2//TLR4//TRF
mmu05310	Asthma - Mus musculus (mouse)	http://www.genome.jp/kegg-bin/show_pathway?mmu05310+13861+14125+14127+14960+14998+15000+15001+16061+19074	6.80668e-05	9	594	25	7584	0.00145035	4.16707	EPX//FCER1A//FCER1G//H2-AA//H2-DMA//H2-DMB2//H2-OA//IGH-VJ558//PRG2
mmu05332	Graft-versus-host disease - Mus musculus (mouse)	http://www.genome.jp/kegg-bin/show_pathway?mmu05332+14939+14960+14963+14998+15000+14990+15001+15007+15013+15024+15042+15051+15978+18646	7.42521e-05	14	594	56	7584	0.00146913	4.12929	GZMB//H2-AA//H2-BL//H2-DMA//H2-DMB2//H2-M2//H2-OA//H2-Q10//H2-Q2//H2-T10//H2-T24//H2-T9//IFNG//PRF1
mmu04380	Osteoclast differentiation - Mus musculus (mouse)	http://www.genome.jp/kegg-bin/show_pathway?mmu04380+12229+12978+13057+14129+14131+246256+751864+15976+15978+16416+16477+232801+18726+26415+26417+17969+18034+30955+18729+320832+668101+20846+21813	0.000100232	23	594	126	7584	0.00185094	3.999	BTK//CSF1R//CYBA//FCGR1//FCGR3//FCGR4//GM9733//IFNAR2//IFNG//ITGB3//JUNB//LILRA5//LILRA6//MAPK13//MAPK3//NCF1//NFKB2//PIK3CG//PIRA6//SIRPB1A//SIRPB1B//STAT1//TGFBR2
mmu04940	Type I diabetes mellitus - Mus musculus (mouse)	http://www.genome.jp/kegg-bin/show_pathway?mmu04940+14939+14960+14963+14998+15000+14990+15001+15007+15013+15024+15042+15051+15978+18646	0.000199729	14	594	61	7584	0.00345781	3.69956	GZMB//H2-AA//H2-BL//H2-DMA//H2-DMB2//H2-M2//H2-OA//H2-Q10//H2-Q2//H2-T10//H2-T24//H2-T9//IFNG//PRF1
mmu05168	Herpes simplex infection - Mus musculus (mouse)	http://www.genome.jp/kegg-bin/show_pathway?mmu05168+12266+12367+16149+667373+14960+14963+14998+15000+14990+15001+15007+15013+15024+15042+15051+15962+404549+15976+15978+246730+246727+231805+19045+19294+24014+20846+21354+24088+230979+50930	0.000695535	30	594	207	7584	0.0113331	3.15768	C3//CASP3//CD74//GM14446//H2-AA//H2-BL//H2-DMA//H2-DMB2//H2-M2//H2-OA//H2-Q10//H2-Q2//H2-T10//H2-T24//H2-T9//IFNA1//IFNA14//IFNAR2//IFNG//OAS1A//OAS3//PILRA//PPP1CA//PVRL2//RNASEL//STAT1//TAP1//TLR2//TNFRSF14//TNFSF14
mmu05145	Toxoplasmosis - Mus musculus (mouse)	http://www.genome.jp/kegg-bin/show_pathway?mmu05145+11796+12367+14960+14998+15000+15001+15978+16145+266632+15944+26415+26417+18126+30955+105675+20846+20848+24088+21898	0.00113037	19	594	113	7584	0.0173518	2.94678	BIRC3//CASP3//H2-AA//H2-DMA//H2-DMB2//H2-OA//IFNG//IGTP//IRAK4//IRGM1//MAPK13//MAPK3//NOS2//PIK3CG//PPIF//STAT1//STAT3//TLR2//TLR4
mmu00860	Porphyrin and chlorophyll metabolism - Mus musculus (mouse)	http://www.genome.jp/kegg-bin/show_pathway?mmu00860+17025+11656+233016+12870+14151+14325+15288+15368+15369+394430	0.0011902	10	594	42	7584	0.0173518	2.92438	ALAD//ALAS2//BLVRB//CP//FECH//FTL1//HMBS//HMOX1//HMOX2//UGT1A10
mmu04932	Non-alcoholic fatty liver disease (NAFLD) - Mus musculus (mouse)	http://www.genome.jp/kegg-bin/show_pathway?mmu04932+11911+12122+12367+12857+333182+78943+16194+26403+21428+58805+67273+69875+67184+230075+68349+78330+22259+30955+108079+19079+108097+66052+66152+22272	0.00143917	24	594	160	7584	0.0191796	2.84189	ATF4//BID//CASP3//COX4I1//COX6B2//ERN1//IL6RA//MAP3K11//MLX//MLXIPL//NDUFA10//NDUFA11//NDUFA13//NDUFB6//NDUFS3//NDUFV3//NR1H3//PIK3CG//PRKAA2//PRKAB1//PRKAB2//SDHC//UQCR10//UQCRQ
mmu05016	Huntington's disease - Mus musculus (mouse)	http://www.genome.jp/kegg-bin/show_pathway?mmu05016+11773+232910+11949+11951+12064+12367+12857+333182+26427+14775+15114+67273+69875+67184+230075+68349+78330+18795+66420+69920+66491+105675+66052+20655+21817+66152+22272	0.00145404	27	594	188	7584	0.0191796	2.83742	AP2M1//AP2S1//ATP5C1//ATP5G1//BDNF//CASP3//COX4I1//COX6B2//CREB3L1//GPX1//HAP1//NDUFA10//NDUFA11//NDUFA13//NDUFB6//NDUFS3//NDUFV3//PLCB1//POLR2E//POLR2I//POLR2L//PPIF//SDHC//SOD1//TGM2//UQCR10//UQCRQ
mmu05323	Rheumatoid arthritis - Mus musculus (mouse)	http://www.genome.jp/kegg-bin/show_pathway?mmu05323+54411+11966+66237+14254+14960+14998+15000+15001+15894+15978+16061+16408+24088+21898+24099	0.00175142	15	594	83	7584	0.021652	2.75661	ATP6AP1//ATP6V1B2//ATP6V1G2//FLT1//H2-AA//H2-DMA//H2-DMB2//H2-OA//ICAM1//IFNG//IGH-VJ558//ITGAL//TLR2//TLR4//TNFSF13B
mmu00010	Glycolysis / Gluconeogenesis - Mus musculus (mouse)	http://www.genome.jp/kegg-bin/show_pathway?mmu00010+60525+11669+11670+11674+230163+12183+13808+319625+14433+15275+212032+16828+18655	0.00179782	13	594	67	7584	0.021652	2.74526	ACSS2//ALDH2//ALDH3A1//ALDOA//ALDOB//BPGM//ENO3//GALM//GAPDH//HK1//HK3//LDHA//PGK1
mmu05203	Viral carcinogenesis - Mus musculus (mouse)	http://www.genome.jp/kegg-bin/show_pathway?mmu05203+11909+11911+12266+12367+12579+26427+14963+14990+15007+15013+15024+15042+15051+79221+319177+319186+319188+319155+319156+319158+319160+100041230+97122+320332+15451+17000+26417+18034+30955+20848+22631	0.00205196	31	594	231	7584	0.0236831	2.68783	ATF2//ATF4//C3//CASP3//CDKN2B//CREB3L1//H2-BL//H2-M2//H2-Q10//H2-Q2//H2-T10//H2-T24//H2-T9//HDAC9//HIST1H2BA//HIST1H2BM//HIST1H2BP//HIST1H4C//HIST1H4D//HIST1H4I//HIST1H4K//HIST1H4M//HIST2H4//HIST4H4//HPN//LTBR//MAPK3//NFKB2//PIK3CG//STAT3//YWHAZ
mmu05132	Salmonella infection - Mus musculus (mouse)	http://www.genome.jp/kegg-bin/show_pathway?mmu05132+11465+56378+68089+12475+235661+15978+26415+26417+18126+18643+66824+56212+19878+21898	0.00297713	14	594	79	7584	0.0307683	2.5262	ACTG1//ARPC3//ARPC4//CD14//DYNC1LI1//IFNG//MAPK13//MAPK3//NOS2//PFN1//PYCARD//RHOG//ROCK2//TLR4
mmu04810	Regulation of actin cytoskeleton - Mus musculus (mouse)	http://www.genome.jp/kegg-bin/show_pathway?mmu04810+11465+16801+56378+68089+12475+12631+12928+56419+14177+14701+23920+109700+16399+16408+16416+192897+26396+26417+17886+98932+107589+18479+18590+18643+30955+18720+19045+19878+22330	0.0030048	29	594	217	7584	0.0307683	2.52218	ACTG1//ARHGEF1//ARPC3//ARPC4//CD14//CFL1//CRK//DIAP3//FGF6//GNG12//INSRR//ITGA1//ITGA2B//ITGAL//ITGB3//ITGB4//MAP2K2//MAPK3//MYH9//MYL9//MYLK//PAK1//PDGFA//PFN1//PIK3CG//PIP5K1A//PPP1CA//ROCK2//VCL
mmu00480	Glutathione metabolism - Mus musculus (mouse)	http://www.genome.jp/kegg-bin/show_pathway?mmu00480+14381+14630+23887+14775+625249+69590+14869+14871+15926+56615+66447	0.0030938	11	594	55	7584	0.0307683	2.50951	G6PDX//GCLM//GGT5//GPX1//GPX4//GPX8//GSTP2//GSTT1//IDH1//MGST1//MGST3
mmu04142	Lysosome - Mus musculus (mouse)	http://www.genome.jp/kegg-bin/show_pathway?mmu04142+11432+11881+54411+12512+12514+13032+13033+13035+64138+14466+16784+16792+16889+17939+27426+16541+19063+54397+18173	0.00311015	19	594	123	7584	0.0307683	2.50722	ACP2//ARSB//ATP6AP1//CD63//CD68//CTSC//CTSD//CTSG//CTSZ//GBA//LAMP2//LAPTM5//LIPA//NAGA//NAGPA//NAPSA//PPT1//PPT2//SLC11A1
mmu05133	Pertussis - Mus musculus (mouse)	http://www.genome.jp/kegg-bin/show_pathway?mmu05133+12262+50909+12266+12268+12367+12475+12631+266632+26415+26417+18126+66824+21898	0.00447463	13	594	74	7584	0.0427404	2.34924	C1QC//C1RA//C3//C4B//CASP3//CD14//CFL1//IRAK4//MAPK13//MAPK3//NOS2//PYCARD//TLR4
mmu03010	Ribosome - Mus musculus (mouse)	http://www.genome.jp/kegg-bin/show_pathway?mmu03010+94061+107732+66407+269261+270106+319195+19899+19941+19942+19944+68436+54217+67248+27176+26961+20054+20055+20068+20084+16898+20116+16785	0.00483455	22	594	156	7584	0.0431276	2.31564	MRPL1//MRPL10//MRPS15//RPL12//RPL13//RPL17//RPL18//RPL26//RPL27//RPL29//RPL34//RPL36//RPL39//RPL7A//RPL8//RPS15//RPS16//RPS17//RPS18//RPS2//RPS8//RPSA
mmu04062	Chemokine signaling pathway - Mus musculus (mouse)	http://www.genome.jp/kegg-bin/show_pathway?mmu04062+104110+11515+24047+20308+12768+12770+12928+13051+17329+14191+14697+66066+14701+14710+14772+26385+26417+17969+18479+30955+18795+18753+19395+19878+20846+20848	0.00497564	26	594	195	7584	0.0431276	2.30315	ADCY4//ADCY9//CCL19//CCL9//CCR1//CCR1L1//CRK//CX3CR1//CXCL9//FGR//GNB5//GNG11//GNG12//GNGT2//GRK4//GRK6//MAPK3//NCF1//PAK1//PIK3CG//PLCB1//PRKCD//RASGRP2//ROCK2//STAT1//STAT3
mmu04620	Toll-like receptor signaling pathway - Mus musculus (mouse)	http://www.genome.jp/kegg-bin/show_pathway?mmu04620+12475+17329+15962+404549+15976+266632+26396+26415+26417+30955+20750+20846+24088+21898+170744+54473	0.00498225	16	594	101	7584	0.0431276	2.30258	CD14//CXCL9//IFNA1//IFNA14//IFNAR2//IRAK4//MAP2K2//MAPK13//MAPK3//PIK3CG//SPP1//STAT1//TLR2//TLR4//TLR8//TOLLIP
mmu05321	Inflammatory bowel disease (IBD) - Mus musculus (mouse)	http://www.genome.jp/kegg-bin/show_pathway?mmu05321+14960+14998+15000+15001+15978+16174+16186+20846+20848+24088+21898	0.00544182	11	594	59	7584	0.0447621	2.26426	H2-AA//H2-DMA//H2-DMB2//H2-OA//IFNG//IL18RAP//IL2RG//STAT1//STAT3//TLR2//TLR4
mmu05142	Chagas disease (American trypanosomiasis) - Mus musculus (mouse)	http://www.genome.jp/kegg-bin/show_pathway?mmu05142+11421+12262+12266+12503+12500+14683+15978+266632+26415+26417+18126+30955+18795+21813+24088+21898	0.00549426	16	594	102	7584	0.0447621	2.26009	ACE//C1QC//C3//CD247//CD3D//GNAS//IFNG//IRAK4//MAPK13//MAPK3//NOS2//PIK3CG//PLCB1//TGFBR2//TLR2//TLR4
mmu05340	Primary immunodeficiency - Mus musculus (mouse)	http://www.genome.jp/kegg-bin/show_pathway?mmu05340+12229+12500+12518+12525+16061+16186+21354+72049	0.00572607	8	594	36	7584	0.0453177	2.24214	BTK//CD3D//CD79A//CD8A//IGH-VJ558//IL2RG//TAP1//TNFRSF13C
mmu04514	Cell adhesion molecules (CAMs) - Mus musculus (mouse)	http://www.genome.jp/kegg-bin/show_pathway?mmu04514+225825+12511+12525+242653+16456+14960+14963+14998+15000+14990+15001+15007+15013+15024+15042+15051+15894+16408+18191+18613+19294+13003	0.00654249	22	594	160	7584	0.0503408	2.18426	CD226//CD6//CD8A//CLDN19//F11R//H2-AA//H2-BL//H2-DMA//H2-DMB2//H2-M2//H2-OA//H2-Q10//H2-Q2//H2-T10//H2-T24//H2-T9//ICAM1//ITGAL//NRXN3//PECAM1//PVRL2//VCAN
mmu05202	Transcriptional misregulation in cancer - Mus musculus (mouse)	http://www.genome.jp/kegg-bin/show_pathway?mmu05202+12046+11796+12475+110794+12978+13714+14129+14254+626150+14939+319148+260423+319154+15446+16000+16061+108829+17095+17260+17523+56312+18590+12394+21813	0.00681449	24	594	180	7584	0.0510166	2.16657	BCL2A1C//BIRC3//CD14//CEBPE//CSF1R//ELK4//FCGR1//FLT1//GM12271//GZMB//HIST1H3C//HIST1H3F//HIST2H3B//HPGD//IGF1//IGH-VJ558//JMJD1C//LYL1//MEF2C//MPO//NUPR1//PDGFA//RUNX1//TGFBR2
mmu05144	Malaria - Mus musculus (mouse)	http://www.genome.jp/kegg-bin/show_pathway?mmu05144+12491+15122+15129+15130+15894+15978+16408+18613+24088+21898	0.00827475	10	594	54	7584	0.0601959	2.08224	CD36//HBA-A1//HBB-B1//HBB-B2//ICAM1//IFNG//ITGAL//PECAM1//TLR2//TLR4
mmu04918	Thyroid hormone synthesis - Mus musculus (mouse)	http://www.genome.jp/kegg-bin/show_pathway?mmu04918+104110+11515+11890+11909+11911+26427+11936+14683+14775+69590+18795+21819	0.00847523	12	594	71	7584	0.0601959	2.07185	ADCY4//ADCY9//ASGR2//ATF2//ATF4//CREB3L1//FXYD2//GNAS//GPX1//GPX8//PLCB1//TG
mmu04666	Fc gamma R-mediated phagocytosis - Mus musculus (mouse)	http://www.genome.jp/kegg-bin/show_pathway?mmu04666+56378+68089+12631+12928+14129+16061+26417+17969+18479+30955+18720+19012+18753+58988	0.00886561	14	594	89	7584	0.0613943	2.05229	ARPC3//ARPC4//CFL1//CRK//FCGR1//IGH-VJ558//MAPK3//NCF1//PAK1//PIK3CG//PIP5K1A//PPAP2A//PRKCD//RPS6KB2
mmu05164	Influenza A - Mus musculus (mouse)	http://www.genome.jp/kegg-bin/show_pathway?mmu05164+11465+11909+14960+14998+15000+15001+15894+15962+404549+15976+15978+266632+26396+26415+26417+246730+246727+30955+66824+24014+20846+21898	0.0130489	22	594	170	7584	0.0879605	1.88443	ACTG1//ATF2//H2-AA//H2-DMA//H2-DMB2//H2-OA//ICAM1//IFNA1//IFNA14//IFNAR2//IFNG//IRAK4//MAP2K2//MAPK13//MAPK3//OAS1A//OAS3//PIK3CG//PYCARD//RNASEL//STAT1//TLR4
mmu01200	Carbon metabolism - Mus musculus (mouse)	http://www.genome.jp/kegg-bin/show_pathway?mmu01200+60525+11674+230163+71832+13808+13885+14381+14433+14719+15275+212032+15926+15929+18293+18655+66052	0.013337	16	594	112	7584	0.0879605	1.87494	ACSS2//ALDOA//ALDOB//CSL//ENO3//ESD//G6PDX//GAPDH//GOT2//HK1//HK3//IDH1//IDH3G//OGDH//PGK1//SDHC
mmu05010	Alzheimer's disease - Mus musculus (mouse)	http://www.genome.jp/kegg-bin/show_pathway?mmu05010+226548+11937+11949+11951+12122+12364+12367+12857+333182+78943+14433+16956+26417+67273+69875+67184+230075+68349+78330+18795+66052+66152+22272	0.013897	23	594	181	7584	0.0895227	1.85708	APH1A//ATP2A1//ATP5C1//ATP5G1//BID//CASP12//CASP3//COX4I1//COX6B2//ERN1//GAPDH//LPL//MAPK3//NDUFA10//NDUFA11//NDUFA13//NDUFB6//NDUFS3//NDUFV3//PLCB1//SDHC//UQCR10//UQCRQ
mmu04640	Hematopoietic cell lineage - Mus musculus (mouse)	http://www.genome.jp/kegg-bin/show_pathway?mmu04640+12475+12491+12500+12525+12978+14129+14729+54368+16061+16194+109700+16399+16416	0.0157349	13	594	86	7584	0.0976817	1.80314	CD14//CD36//CD3D//CD8A//CSF1R//FCGR1//GP5//GP9//IGH-VJ558//IL6RA//ITGA1//ITGA2B//ITGB3
mmu05100	Bacterial invasion of epithelial cells - Mus musculus (mouse)	http://www.genome.jp/kegg-bin/show_pathway?mmu05100+11465+78514+56378+68089+12928+14388+30955+56212+52398+24050+53860+22330	0.0158689	12	594	77	7584	0.0976817	1.79945	ACTG1//ARHGAP10//ARPC3//ARPC4//CRK//GAB1//PIK3CG//RHOG//SEPT11//SEPT3//SEPT9//VCL
mmu04672	Intestinal immune network for IgA production - Mus musculus (mouse)	http://www.genome.jp/kegg-bin/show_pathway?mmu04672+14960+14998+15000+15001+16061+17000+72049+24099	0.0169343	8	594	43	7584	0.0993982	1.77123	H2-AA//H2-DMA//H2-DMB2//H2-OA//IGH-VJ558//LTBR//TNFRSF13C//TNFSF13B
mmu05143	African trypanosomiasis - Mus musculus (mouse)	http://www.genome.jp/kegg-bin/show_pathway?mmu05143+15122+15129+15130+15894+15978+16061+18795	0.0170274	7	594	35	7584	0.0993982	1.76885	HBA-A1//HBB-B1//HBB-B2//ICAM1//IFNG//IGH-VJ558//PLCB1
mmu04512	ECM-receptor interaction - Mus musculus (mouse)	http://www.genome.jp/kegg-bin/show_pathway?mmu04512+12491+16423+12843+14729+243816+54368+15366+109700+16399+16416+192897+20750+22371	0.0172242	13	594	87	7584	0.0993982	1.76386	CD36//CD47//COL1A2//GP5//GP6//GP9//HMMR//ITGA1//ITGA2B//ITGB3//ITGB4//SPP1//VWF
mmu05014	Amyotrophic lateral sclerosis (ALS) - Mus musculus (mouse)	http://www.genome.jp/kegg-bin/show_pathway?mmu05014+12122+12364+12367+12359+14775+26415+20655+21938+53333	0.0183507	9	594	52	7584	0.103737	1.73635	BID//CASP12//CASP3//CAT//GPX1//MAPK13//SOD1//TNFRSF1B//TOMM40
mmu05166	HTLV-I infection - Mus musculus (mouse)	http://www.genome.jp/kegg-bin/show_pathway?mmu05166+104110+11515+59008+11909+11911+12237+12500+66440+12579+74343+13714+14960+14963+14998+15000+14990+15001+15007+15013+15024+15042+15051+15894+16186+16408+17000+18034+18590+30955+59001+21813+72049	0.0188268	32	594	280	7584	0.104301	1.72522	ADCY4//ADCY9//ANAPC5//ATF2//ATF4//BUB3//CD3D//CDC26//CDKN2B//CRTC2//ELK4//H2-AA//H2-BL//H2-DMA//H2-DMB2//H2-M2//H2-OA//H2-Q10//H2-Q2//H2-T10//H2-T24//H2-T9//ICAM1//IL2RG//ITGAL//LTBR//NFKB2//PDGFA//PIK3CG//POLE3//TGFBR2//TNFRSF13C
mmu03050	Proteasome - Mus musculus (mouse)	http://www.genome.jp/kegg-bin/show_pathway?mmu03050+15978+66537+26441+16913+16912+57296+19186+228769	0.0193256	8	594	44	7584	0.104964	1.71387	IFNG//POMP//PSMA4//PSMB8//PSMB9//PSMD8//PSME1//PSMF1
mmu05146	Amoebiasis - Mus musculus (mouse)	http://www.genome.jp/kegg-bin/show_pathway?mmu05146+11847+12367+12475+12843+13035+14683+15978+16061+18126+30955+18795+380839+18788+24088+21898+22330	0.0244081	16	594	120	7584	0.13002	1.61247	ARG2//CASP3//CD14//COL1A2//CTSG//GNAS//IFNG//IGH-VJ558//NOS2//PIK3CG//PLCB1//SERPINB1C//SERPINB2//TLR2//TLR4//VCL
mmu04064	NF-kappa B signaling pathway - Mus musculus (mouse)	http://www.genome.jp/kegg-bin/show_pathway?mmu04064+12046+11796+12229+24047+12475+15894+16061+266632+17000+18034+21898+72049+24099+50930	0.0271733	14	594	102	7584	0.14197	1.56586	BCL2A1C//BIRC3//BTK//CCL19//CD14//ICAM1//IGH-VJ558//IRAK4//LTBR//NFKB2//TLR4//TNFRSF13C//TNFSF13B//TNFSF14
mmu04151	PI3K-Akt signaling pathway - Mus musculus (mouse)	http://www.genome.jp/kegg-bin/show_pathway?mmu04151+11909+11911+12843+26427+74343+12978+74747+13640+75705+14177+14254+14697+66066+14701+14710+15962+404549+15976+16000+16061+16186+16194+109700+16399+16416+192897+26396+26417+18590+83490+30955+108079+58988+20750+24088+21898+22371+22631	0.0276764	38	594	354	7584	0.14197	1.55789	ATF2//ATF4//COL1A2//CREB3L1//CRTC2//CSF1R//DDIT4//EFNA5//EIF4B//FGF6//FLT1//GNB5//GNG11//GNG12//GNGT2//IFNA1//IFNA14//IFNAR2//IGF1//IGH-VJ558//IL2RG//IL6RA//ITGA1//ITGA2B//ITGB3//ITGB4//MAP2K2//MAPK3//PDGFA//PIK3AP1//PIK3CG//PRKAA2//RPS6KB2//SPP1//TLR2//TLR4//VWF//YWHAZ
mmu00051	Fructose and mannose metabolism - Mus musculus (mouse)	http://www.genome.jp/kegg-bin/show_pathway?mmu00051+67861+11677+11674+230163+15275+212032+54384	0.0297362	7	594	39	7584	0.149762	1.52672	AKR1B10//AKR1B3//ALDOA//ALDOB//HK1//HK3//MTMR7
mmu05012	Parkinson's disease - Mus musculus (mouse)	http://www.genome.jp/kegg-bin/show_pathway?mmu05012+11949+11951+12367+12857+333182+67273+69875+67184+230075+68349+78330+105675+66052+74153+140499+22195+56791+66152+22272	0.0314073	19	594	154	7584	0.155354	1.50297	ATP5C1//ATP5G1//CASP3//COX4I1//COX6B2//NDUFA10//NDUFA11//NDUFA13//NDUFB6//NDUFS3//NDUFV3//PPIF//SDHC//UBA7//UBE2J2//UBE2L3//UBE2L6//UQCR10//UQCRQ
mmu05410	Hypertrophic cardiomyopathy (HCM) - Mus musculus (mouse)	http://www.genome.jp/kegg-bin/show_pathway?mmu05410+11421+11465+12297+16000+109700+16399+16416+192897+108079+19079+108097+22004	0.0322452	12	594	85	7584	0.156701	1.49153	ACE//ACTG1//CACNB3//IGF1//ITGA1//ITGA2B//ITGB3//ITGB4//PRKAA2//PRKAB1//PRKAB2//TPM2
mmu04610	Complement and coagulation cascades - Mus musculus (mouse)	http://www.genome.jp/kegg-bin/show_pathway?mmu04610+12262+50909+12266+12268+14962+14058+74145+14067+14071+19128+22371	0.0364677	11	594	77	7584	0.171213	1.43809	C1QC//C1RA//C3//C4B//CFB//F10//F13A1//F5//F9//PROS1//VWF
mmu04970	Salivary secretion - Mus musculus (mouse)	http://www.genome.jp/kegg-bin/show_pathway?mmu04970+104110+11515+11555+212989+12182+12796+11936+14683+239134+17105+18795	0.0364677	11	594	77	7584	0.171213	1.43809	ADCY4//ADCY9//ADRB2//BEST2//BST1//CAMP//FXYD2//GNAS//GUCY1B2//LYZ2//PLCB1
mmu04270	Vascular smooth muscle contraction - Mus musculus (mouse)	http://www.genome.jp/kegg-bin/show_pathway?mmu04270+104110+11515+16801+109624+14683+239134+26396+26417+17904+98932+107589+66350+211429+18795+19045+18753+19878	0.0384473	17	594	137	7584	0.177499	1.41513	ADCY4//ADCY9//ARHGEF1//CALD1//GNAS//GUCY1B2//MAP2K2//MAPK3//MYL6//MYL9//MYLK//PLA2G12A//PLA2G4B//PLCB1//PPP1CA//PRKCD//ROCK2
mmu00020	Citrate cycle (TCA cycle) - Mus musculus (mouse)	http://www.genome.jp/kegg-bin/show_pathway?mmu00020+104112+71832+15926+15929+18293+66052	0.0404922	6	594	33	7584	0.183874	1.39263	ACLY//CSL//IDH1//IDH3G//OGDH//SDHC
mmu01230	Biosynthesis of amino acids - Mus musculus (mouse)	http://www.genome.jp/kegg-bin/show_pathway?mmu01230+11674+230163+11847+71832+13808+14433+14719+15926+15929+18655+234724	0.042887	11	594	79	7584	0.191608	1.36767	ALDOA//ALDOB//ARG2//CSL//ENO3//GAPDH//GOT2//IDH1//IDH3G//PGK1//TAT
mmu04668	TNF signaling pathway - Mus musculus (mouse)	http://www.genome.jp/kegg-bin/show_pathway?mmu04668+11909+11911+11796+12367+26427+432555+15894+15953+16477+26415+26417+74568+30955+21938	0.0444992	14	594	109	7584	0.195655	1.35165	ATF2//ATF4//BIRC3//CASP3//CREB3L1//GM5431//ICAM1//IFI47//JUNB//MAPK13//MAPK3//MLKL//PIK3CG//TNFRSF1B
mmu05162	Measles - Mus musculus (mouse)	http://www.genome.jp/kegg-bin/show_pathway?mmu05162+12500+68135+15962+404549+15976+15978+16061+16186+266632+246730+246727+30955+56382+20846+20848+24088+21898	0.0458218	17	594	140	7584	0.198322	1.33893	CD3D//EIF3H//IFNA1//IFNA14//IFNAR2//IFNG//IGH-VJ558//IL2RG//IRAK4//OAS1A//OAS3//PIK3CG//RAB9//STAT1//STAT3//TLR2//TLR4
mmu05414	Dilated cardiomyopathy - Mus musculus (mouse)	http://www.genome.jp/kegg-bin/show_pathway?mmu05414+11465+104110+11515+12297+14683+16000+16061+109700+16399+16416+192897+22004	0.047213	12	594	90	7584	0.2012	1.32594	ACTG1//ADCY4//ADCY9//CACNB3//GNAS//IGF1//IGH-VJ558//ITGA1//ITGA2B//ITGB3//ITGB4//TPM2
mmu05169	Epstein-Barr virus infection - Mus musculus (mouse)	http://www.genome.jp/kegg-bin/show_pathway?mmu05169+11909+12182+14191+14963+14990+15007+15013+15024+15042+15051+15894+15978+16061+16408+26415+20602+18034+30955+66420+69920+66491+57296+20848+22631	0.0483875	24	594	215	7584	0.20144	1.31527	ATF2//BST1//FGR//H2-BL//H2-M2//H2-Q10//H2-Q2//H2-T10//H2-T24//H2-T9//ICAM1//IFNG//IGH-VJ558//ITGAL//MAPK13//NCOR2//NFKB2//PIK3CG//POLR2E//POLR2I//POLR2L//PSMD8//STAT3//YWHAZ
mmu04664	Fc epsilon RI signaling pathway - Mus musculus (mouse)	http://www.genome.jp/kegg-bin/show_pathway?mmu04664+12229+14125+14127+16061+26396+26415+26417+30955+211429+18753	0.0487239	10	594	71	7584	0.20144	1.31226	BTK//FCER1A//FCER1G//IGH-VJ558//MAP2K2//MAPK13//MAPK3//PIK3CG//PLA2G4B//PRKCD

## Sheet: NBXH-H vs Water_up-regulated
PathwayID	Definition	OriginalWebSite	Fisher-Pvalue	SelectionCounts	SelectionSize	Count	Size	FDR	Enrichment_Score	Genes
mmu04668	TNF signaling pathway - Mus musculus (mouse)	http://www.genome.jp/kegg-bin/show_pathway?mmu04668+23797+20296+12608+12633+12913+231991+12977+14825+15945+20310+330122+13614+432555+15953+16176+16193+16396+16878+26397+26408+26410+26413+26415+26417+74568+17395+257632+74769+19225+21926+21937+22031+22329	1.0068e-07	33	877	109	7584	2.78885e-05	6.99705	AKT3//CCL2//CEBPB//CFLAR//CREB3//CREB5//CSF1//CXCL1//CXCL10//CXCL2//CXCL3//EDN1//GM5431//IFI47//IL1B//IL6//ITCH//LIF//MAP2K3//MAP3K5//MAP3K8//MAPK1//MAPK13//MAPK3//MLKL//MMP9//NOD2//PIK3CB//PTGS2//TNF//TNFRSF1A//TRAF3//VCAM1
mmu04015	Rap1 signaling pathway - Mus musculus (mouse)	http://www.genome.jp/kegg-bin/show_pathway?mmu04015+104110+224129+11541+23797+11600+12315+70405+12977+12978+12388+238130+13489+14169+67112+64654+14178+14183+14186+14254+14678+15901+16001+16408+16409+16415+16416+16542+16590+16822+14924+26397+26413+26415+26417+17532+18049+18176+18654+74769+18795+18798+18750+18759+19353+64143+110351+76089+21825+21844	1.97601e-06	49	877	216	7584	0.000273678	5.70421	ADCY4//ADCY5//ADORA2B//AKT3//ANGPT1//CALM3//CALML3//CSF1//CSF1R//CTNND1//DOCK4//DRD2//FGF14//FGF22//FGF23//FGF7//FGFR2//FGFR4//FLT1//GNAI2//ID1//IGF1R//ITGAL//ITGAM//ITGB2L//ITGB3//KDR//KIT//LCP2//MAGI1//MAP2K3//MAPK1//MAPK13//MAPK3//MRAS//NGF//NRAS//PGF//PIK3CB//PLCB1//PLCB4//PRKCA//PRKCI//RAC1//RALB//RAP1GAP//RAPGEF2//THBS1//TIAM1
mmu04640	Hematopoietic cell lineage - Mus musculus (mouse)	http://www.genome.jp/kegg-bin/show_pathway?mmu04640+16790+12483+12505+12977+12978+12982+13857+14129+14723+14724+14729+16176+16177+16184+16189+16190+16193+16196+109700+16403+16409+16416+16590+233274+21926	7.99407e-06	25	877	86	7584	0.000738119	5.09723	ANPEP//CD22//CD44//CSF1//CSF1R//CSF2RA//EPOR//FCGR1//GP1BA//GP1BB//GP5//IL1B//IL1R1//IL2RA//IL4//IL4RA//IL6//IL7//ITGA1//ITGA6//ITGAM//ITGB3//KIT//SIGLECH//TNF
mmu04060	Cytokine-cytokine receptor interaction - Mus musculus (mouse)	http://www.genome.jp/kegg-bin/show_pathway?mmu04060+11477+11480+12156+12162+12166+20296+20300+12768+12772+12773+12774+12776+12977+12978+12982+12984+14825+15945+66102+20310+330122+17329+12766+80901+13857+14254+100504346+16153+16169+16171+16176+16177+16180+237310+16184+16189+16190+16193+16196+16542+16590+16878+16880+17000+17480+18413+56744+21926+21937+94185+85030+21942+22035+21950+23832	1.34655e-05	55	877	269	7584	0.000932489	4.87078	ACVR1//ACVR2A//BMP2//BMP7//BMPR1A//CCL2//CCL25//CCR1//CCR2//CCR4//CCR5//CCR8//CSF1//CSF1R//CSF2RA//CSF2RB2//CXCL1//CXCL10//CXCL16//CXCL2//CXCL3//CXCL9//CXCR3//CXCR6//EPOR//FLT1//GM13304//IL10//IL15RA//IL17A//IL1B//IL1R1//IL1RAP//IL22RA2//IL2RA//IL4//IL4RA//IL6//IL7//KDR//KIT//LIF//LIFR//LTBR//MPL//OSM//PF4//TNF//TNFRSF1A//TNFRSF21//TNFRSF25//TNFRSF9//TNFSF10//TNFSF9//XCR1
mmu05205	Proteoglycans in cancer - Mus musculus (mouse)	http://www.genome.jp/kegg-bin/show_pathway?mmu05205+23797+11733+109676+69632+12322+12323+12390+12402+12443+12505+12842+12843+13043+14169+67112+64654+14178+14362+14369+15200+16001+16410+16416+16419+16542+26413+26415+26417+17395+17532+71950+18176+18569+74769+18792+19046+18750+19247+19353+15529+319757+21825+21844+21859+21898+21926	9.55914e-05	46	877	228	7584	0.00529576	4.01958	AKT3//ANK1//ANK2//ARHGEF12//CAMK2A//CAMK2B//CAV2//CBL//CCND1//CD44//COL1A1//COL1A2//CTTN//FGF14//FGF22//FGF23//FGF7//FZD1//FZD7//HBEGF//IGF1R//ITGAV//ITGB3//ITGB5//KDR//MAPK1//MAPK13//MAPK3//MMP9//MRAS//NANOG//NRAS//PDCD4//PIK3CB//PLAU//PPP1CB//PRKCA//PTPN11//RAC1//SDC2//SMO//THBS1//TIAM1//TIMP3//TLR4//TNF
mmu05020	Prion diseases - Mus musculus (mouse)	http://www.genome.jp/kegg-bin/show_pathway?mmu05020+12262+69379+193740+16176+16193+226519+26413+26417+17967+18128+19122+20867	0.000350782	12	877	35	7584	0.0161944	3.45496	C1QC//C8G//HSPA1A//IL1B//IL6//LAMC1//MAPK1//MAPK3//NCAM1//NOTCH1//PRNP//STIP1
mmu05150	Staphylococcus aureus infection - Mus musculus (mouse)	http://www.genome.jp/kegg-bin/show_pathway?mmu05150+12262+50909+12263+12266+12268+14962+12628+14129+14289+16153+16408+16409+16415+19204+20344	0.000565086	15	877	52	7584	0.0213532	3.24789	C1QC//C1RA//C2//C3//C4B//CFB//CFH//FCGR1//FPR2//IL10//ITGAL//ITGAM//ITGB2L//PTAFR//SELP
mmu05200	Pathways in cancer - Mus musculus (mouse)	http://www.genome.jp/kegg-bin/show_pathway?mmu05200+23797+11864+12006+12048+110279+11799+12156+12402+12443+12447+12578+12579+12606+54124+94216+12978+12982+13017+69635+13176+242705+112407+13819+14169+67112+64654+14178+14183+14362+14369+16001+16193+16403+16410+16590+16776+226519+26413+26417+17342+17395+18176+18510+18654+74769+18750+19207+19225+19353+64143+218772+20183+27401+319757+21416+22031+11798	0.000680936	57	877	324	7584	0.0213532	3.16689	AKT3//ARNT2//AXIN2//BCL2L1//BCR//BIRC5//BMP2//CBL//CCND1//CCNE1//CDKN2A//CDKN2B//CEBPA//CKS1B//COL4A6//CSF1R//CSF2RA//CTBP2//DAPK1//DCC//E2F2//EGLN3//EPAS1//FGF14//FGF22//FGF23//FGF7//FGFR2//FZD1//FZD7//IGF1R//IL6//ITGA6//ITGAV//KIT//LAMA5//LAMC1//MAPK1//MAPK3//MITF//MMP9//NRAS//PAX8//PGF//PIK3CB//PRKCA//PTCH2//PTGS2//RAC1//RALB//RARB//RXRG//SKP2//SMO//TCF7L2//TRAF3//XIAP
mmu04062	Chemokine signaling pathway - Mus musculus (mouse)	http://www.genome.jp/kegg-bin/show_pathway?mmu04062+104110+224129+110355+23797+20296+20300+12768+12772+12773+12774+12776+14825+15945+66102+20310+330122+17329+12766+80901+100504346+14678+14701+14706+14708+17096+26413+26417+18176+56744+74769+18795+18798+19353+216148+271849+21844+73178+23832	0.000769135	38	877	195	7584	0.0213532	3.114	ADCY4//ADCY5//ADRBK1//AKT3//CCL2//CCL25//CCR1//CCR2//CCR4//CCR5//CCR8//CXCL1//CXCL10//CXCL16//CXCL2//CXCL3//CXCL9//CXCR3//CXCR6//GM13304//GNAI2//GNG12//GNG4//GNG7//LYN//MAPK1//MAPK3//NRAS//PF4//PIK3CB//PLCB1//PLCB4//RAC1//SHC2//SHC4//TIAM1//WASL//XCR1
mmu04270	Vascular smooth muscle contraction - Mus musculus (mouse)	http://www.genome.jp/kegg-bin/show_pathway?mmu04270+104110+224129+11541+11548+69632+54652+109624+12315+70405+13118+13614+60596+54195+16531+26413+26417+216459+98932+230899+230103+26565+18783+18795+18798+19046+18750+19222+51801+54409	0.000818062	29	877	137	7584	0.0213532	3.08721	ADCY4//ADCY5//ADORA2B//ADRA1B//ARHGEF12//CACNA1F//CALD1//CALM3//CALML3//CYP4A12B//EDN1//GUCY1A3//GUCY1B3//KCNMA1//MAPK1//MAPK3//MYL6B//MYL9//NPPA//NPR2//PLA2G10//PLA2G4A//PLCB1//PLCB4//PPP1CB//PRKCA//PTGIR//RAMP1//RAMP2
mmu05144	Malaria - Mus musculus (mouse)	http://www.genome.jp/kegg-bin/show_pathway?mmu05144+20296+12520+16153+16176+16193+16408+16415+80782+15529+20344+21825+21898+81897+21926+22329	0.000874456	15	877	54	7584	0.0213532	3.05826	CCL2//CD81//IL10//IL1B//IL6//ITGAL//ITGB2L//KLRB1B//SDC2//SELP//THBS1//TLR4//TLR9//TNF//VCAM1
mmu04810	Regulation of actin cytoskeleton - Mus musculus (mouse)	http://www.genome.jp/kegg-bin/show_pathway?mmu04810+329165+69632+20430+13367+56419+330662+13800+14169+67112+64654+14178+14183+14186+14701+227753+109700+16403+16407+16408+16409+16410+16415+16416+192897+16419+26413+26417+17532+98932+50884+18176+70584+74769+19046+19353+20259+237860+21844+83767+242687+73178	0.000925046	41	877	217	7584	0.0213532	3.03384	ABI2//ARHGEF12//CYFIP1//DIAP1//DIAP3//DOCK1//ENAH//FGF14//FGF22//FGF23//FGF7//FGFR2//FGFR4//GNG12//GSN//ITGA1//ITGA6//ITGAE//ITGAL//ITGAM//ITGAV//ITGB2L//ITGB3//ITGB4//ITGB5//MAPK1//MAPK3//MRAS//MYL9//NCKAP1//NRAS//PAK4//PIK3CB//PPP1CB//RAC1//SCIN//SSH2//TIAM1//WASF1//WASF2//WASL
mmu05202	Transcriptional misregulation in cancer - Mus musculus (mouse)	http://www.genome.jp/kegg-bin/show_pathway?mmu05202+11864+11908+12048+12053+12580+12606+12608+110794+12978+50701+18612+14011+14048+14129+14254+229593+15446+15902+16001+16193+16409+17132+17268+17395+18109+18510+18514+18516+18792+19126+12393+20183+21912+107823+22642	0.00127253	35	877	180	7584	0.0249996	2.89533	ARNT2//ATF1//BCL2L1//BCL6//CDKN2C//CEBPA//CEBPB//CEBPE//CSF1R//ELANE//ETV4//ETV6//EYA1//FCGR1//FLT1//GOLPH3L//HPGD//ID2//IGF1R//IL6//ITGAM//MAF//MEIS1//MMP9//MYCN//PAX8//PBX1//PBX3//PLAU//PROM1//RUNX2//RXRG//TSPAN7//WHSC1//ZBTB17
mmu05410	Hypertrophic cardiomyopathy (HCM) - Mus musculus (mouse)	http://www.genome.jp/kegg-bin/show_pathway?mmu05410+54652+56808+13614+16193+109700+16403+16410+16416+192897+16419+17868+17888+17897+108097+108099+20541+21926+22003+22004+22138	0.00133962	20	877	85	7584	0.0249996	2.87302	CACNA1F//CACNA2D2//EDN1//IL6//ITGA1//ITGA6//ITGAV//ITGB3//ITGB4//ITGB5//MYBPC3//MYH6//MYL3//PRKAB2//PRKAG2//SLC8A1//TNF//TPM1//TPM2//TTN
mmu04014	Ras signaling pathway - Mus musculus (mouse)	http://www.genome.jp/kegg-bin/show_pathway?mmu04014+23797+11600+12048+12315+70405+12977+12978+14169+67112+64654+14178+14183+14186+14254+14701+14706+14708+15566+16001+16542+16590+26413+26417+17532+18049+18176+70584+18654+74769+85031+26565+18783+18805+18750+19247+19353+64143+54153+233046+216148+271849+21844	0.00148268	42	877	229	7584	0.0249996	2.82895	AKT3//ANGPT1//BCL2L1//CALM3//CALML3//CSF1//CSF1R//FGF14//FGF22//FGF23//FGF7//FGFR2//FGFR4//FLT1//GNG12//GNG4//GNG7//HTR7//IGF1R//KDR//KIT//MAPK1//MAPK3//MRAS//NGF//NRAS//PAK4//PGF//PIK3CB//PLA1A//PLA2G10//PLA2G4A//PLD1//PRKCA//PTPN11//RAC1//RALB//RASA4//RASGRP4//SHC2//SHC4//TIAM1
mmu04915	Estrogen signaling pathway - Mus musculus (mouse)	http://www.genome.jp/kegg-bin/show_pathway?mmu04915+104110+224129+23797+12315+70405+12913+231991+14229+14678+15200+193740+26413+26417+17395+18127+18176+18390+74769+18795+18798+216148+271849	0.00152397	22	877	98	7584	0.0249996	2.81702	ADCY4//ADCY5//AKT3//CALM3//CALML3//CREB3//CREB5//FKBP5//GNAI2//HBEGF//HSPA1A//MAPK1//MAPK3//MMP9//NOS3//NRAS//OPRM1//PIK3CB//PLCB1//PLCB4//SHC2//SHC4
mmu05133	Pertussis - Mus musculus (mouse)	http://www.genome.jp/kegg-bin/show_pathway?mmu05133+12262+50909+12263+12266+12268+12315+70405+14678+16153+16176+16193+16409+16415+26413+26415+26417+21898+21926	0.00153427	18	877	74	7584	0.0249996	2.8141	C1QC//C1RA//C2//C3//C4B//CALM3//CALML3//GNAI2//IL10//IL1B//IL6//ITGAM//ITGB2L//MAPK1//MAPK13//MAPK3//TLR4//TNF
mmu04510	Focal adhesion - Mus musculus (mouse)	http://www.genome.jp/kegg-bin/show_pathway?mmu04510+23797+12334+12390+12443+12445+12842+12843+94216+13367+330662+14254+16001+16202+109700+16403+16410+16416+192897+16419+16542+16776+226519+26413+26417+98932+70584+57342+18654+74769+19046+18750+19353+216148+271849+21825+22371+11798+22793	0.00219715	38	877	206	7584	0.0334914	2.65814	AKT3//CAPN2//CAV2//CCND1//CCND3//COL1A1//COL1A2//COL4A6//DIAP1//DOCK1//FLT1//IGF1R//ILK//ITGA1//ITGA6//ITGAV//ITGB3//ITGB4//ITGB5//KDR//LAMA5//LAMC1//MAPK1//MAPK3//MYL9//PAK4//PARVA//PGF//PIK3CB//PPP1CB//PRKCA//RAC1//SHC2//SHC4//THBS1//VWF//XIAP//ZYX
mmu05146	Amoebiasis - Mus musculus (mouse)	http://www.genome.jp/kegg-bin/show_pathway?mmu05146+11847+69379+12842+12843+94216+13035+14680+15507+16153+16176+16177+16193+16409+16415+16776+226519+74769+18795+18798+18750+18788+20719+97848+21898+21926	0.00229725	25	877	120	7584	0.0334914	2.63879	ARG2//C8G//COL1A1//COL1A2//COL4A6//CTSG//GNAL//HSPB1//IL10//IL1B//IL1R1//IL6//ITGAM//ITGB2L//LAMA5//LAMC1//PIK3CB//PLCB1//PLCB4//PRKCA//SERPINB2//SERPINB6A//SERPINB6C//TLR4//TNF
mmu04666	Fc gamma R-mediated phagocytosis - Mus musculus (mouse)	http://www.genome.jp/kegg-bin/show_pathway?mmu04666+23797+13196+211914+14129+227753+16331+16332+17096+26413+26417+17118+74769+18783+18805+18750+19353+20259+83767+242687+73178	0.00241815	20	877	89	7584	0.0334914	2.61652	AKT3//ASAP1//ASAP2//FCGR1//GSN//INPP5D//INPPL1//LYN//MAPK1//MAPK3//MARCKS//PIK3CB//PLA2G4A//PLD1//PRKCA//RAC1//SCIN//WASF1//WASF2//WASL
mmu05034	Alcoholism - Mus musculus (mouse)	http://www.genome.jp/kegg-bin/show_pathway?mmu05034+224129+11541+12315+70405+207565+12913+231991+13195+13489+547160+14678+14701+14706+14708+56233+79221+319164+319166+319177+68024+319179+319181+665596+69386+319158+319189+319190+109731+26413+26417+109648+18176+19046+216148+271849+214084+21823	0.00259148	37	877	201	7584	0.0341829	2.58645	ADCY5//ADORA2B//CALM3//CALML3//CAMKK2//CREB3//CREB5//DDC//DRD2//GM14484//GNAI2//GNG12//GNG4//GNG7//HDAC7//HDAC9//HIST1H2AC//HIST1H2AE//HIST1H2BA//HIST1H2BC//HIST1H2BE//HIST1H2BG//HIST1H2BQ//HIST1H4H//HIST1H4I//HIST2H2BB//HIST2H2BE//MAOB//MAPK1//MAPK3//NPY//NRAS//PPP1CB//SHC2//SHC4//SLC18A2//TH
mmu04370	VEGF signaling pathway - Mus musculus (mouse)	http://www.genome.jp/kegg-bin/show_pathway?mmu04370+23797+15507+16542+26413+26415+26417+102626+18127+18176+74769+18783+18750+19225+19353+216148	0.00277088	15	877	60	7584	0.0343125	2.55738	AKT3//HSPB1//KDR//MAPK1//MAPK13//MAPK3//MAPKAPK3//NOS3//NRAS//PIK3CB//PLA2G4A//PRKCA//PTGS2//RAC1//SHC2
mmu05214	Glioma - Mus musculus (mouse)	http://www.genome.jp/kegg-bin/show_pathway?mmu05214+23797+12315+70405+12322+12323+12443+12578+242705+16001+26413+26417+18176+74769+18750+216148+271849	0.00284905	16	877	66	7584	0.0343125	2.5453	AKT3//CALM3//CALML3//CAMK2A//CAMK2B//CCND1//CDKN2A//E2F2//IGF1R//MAPK1//MAPK3//NRAS//PIK3CB//PRKCA//SHC2//SHC4
mmu05132	Salmonella infection - Mus musculus (mouse)	http://www.genome.jp/kegg-bin/show_pathway?mmu05132+14825+20310+330122+234663+16176+16193+16593+26413+26415+26417+263803+19353+280408+21872+21898+83767+242687+73178	0.00333181	18	877	79	7584	0.0379951	2.47732	CXCL1//CXCL2//CXCL3//DYNC1LI2//IL1B//IL6//KLC1//MAPK1//MAPK13//MAPK3//PKN3//RAC1//RILP//TJP1//TLR4//WASF1//WASF2//WASL
mmu04151	PI3K-Akt signaling pathway - Mus musculus (mouse)	http://www.genome.jp/kegg-bin/show_pathway?mmu04151+23797+11600+12048+12443+12445+12447+12842+12843+94216+12913+231991+12977+12978+13684+13685+13857+14169+67112+64654+14178+14183+14186+14254+14701+14706+14708+16001+16184+16189+16190+16193+16196+109700+16403+16410+16416+192897+16419+16542+16590+16776+226519+26413+26417+18049+18127+18176+18413+18654+244650+74769+263803+18750+19353+21825+21898+22371…	0.00342916	58	877	354	7584	0.0379951	2.46481	AKT3//ANGPT1//BCL2L1//CCND1//CCND3//CCNE1//COL1A1//COL1A2//COL4A6//CREB3//CREB5//CSF1//CSF1R//EIF4E//EIF4EBP1//EPOR//FGF14//FGF22//FGF23//FGF7//FGFR2//FGFR4//FLT1//GNG12//GNG4//GNG7//IGF1R//IL2RA//IL4//IL4RA//IL6//IL7//ITGA1//ITGA6//ITGAV//ITGB3//ITGB4//ITGB5//KDR//KIT//LAMA5//LAMC1//MAPK1//MAPK3//NGF//NOS3//NRAS//OSM//PGF//PHLPP2//PIK3CB//PKN3//PRKCA//RAC1//THBS1//TLR4//VWF//YWHAG
mmu05222	Small cell lung cancer - Mus musculus (mouse)	http://www.genome.jp/kegg-bin/show_pathway?mmu05222+23797+12048+12443+12447+12579+54124+94216+242705+16403+16410+16776+226519+74769+19225+218772+20183+27401+22031+11798	0.00375624	19	877	86	7584	0.0396238	2.42525	AKT3//BCL2L1//CCND1//CCNE1//CDKN2B//CKS1B//COL4A6//E2F2//ITGA6//ITGAV//LAMA5//LAMC1//PIK3CB//PTGS2//RARB//RXRG//SKP2//TRAF3//XIAP
mmu04261	Adrenergic signaling in cardiomyocytes - Mus musculus (mouse)	http://www.genome.jp/kegg-bin/show_pathway?mmu04261+104110+224129+11548+11554+23797+11941+381290+54652+56808+12315+70405+12322+12323+12913+231991+14678+26413+26415+26417+17888+17897+74769+18795+18798+19046+18750+20541+22003+22004	0.00386225	29	877	151	7584	0.0396238	2.41316	ADCY4//ADCY5//ADRA1B//ADRB1//AKT3//ATP2B2//ATP2B4//CACNA1F//CACNA2D2//CALM3//CALML3//CAMK2A//CAMK2B//CREB3//CREB5//GNAI2//MAPK1//MAPK13//MAPK3//MYH6//MYL3//PIK3CB//PLCB1//PLCB4//PPP1CB//PRKCA//SLC8A1//TPM1//TPM2
mmu04520	Adherens junction - Mus musculus (mouse)	http://www.genome.jp/kegg-bin/show_pathway?mmu04520+12388+14158+16001+26413+26417+18099+19271+58235+19294+19353+20613+21416+21872+83767+242687+73178+22612	0.00452202	17	877	75	7584	0.0437329	2.34467	CTNND1//FERT2//IGF1R//MAPK1//MAPK3//NLK//PTPRJ//PVRL1//PVRL2//RAC1//SNAI1//TCF7L2//TJP1//WASF1//WASF2//WASL//YES1
mmu04066	HIF-1 signaling pathway - Mus musculus (mouse)	http://www.genome.jp/kegg-bin/show_pathway?mmu04066+23797+11600+12322+12323+13614+112407+13684+13685+13806+14254+15277+212032+15368+16001+16193+17000+26413+26417+18127+230899+74769+18750+21898	0.00457853	23	877	113	7584	0.0437329	2.33927	AKT3//ANGPT1//CAMK2A//CAMK2B//EDN1//EGLN3//EIF4E//EIF4EBP1//ENO1//FLT1//HK2//HK3//HMOX1//IGF1R//IL6//LTBR//MAPK1//MAPK3//NOS3//NPPA//PIK3CB//PRKCA//TLR4
mmu04620	Toll-like receptor signaling pathway - Mus musculus (mouse)	http://www.genome.jp/kegg-bin/show_pathway?mmu04620+23797+12519+15945+17329+16176+16193+26397+26410+26413+26415+26417+74769+19353+142980+21898+170743+170744+81897+21926+54473+22031	0.00509186	21	877	101	7584	0.0470148	2.29312	AKT3//CD80//CXCL10//CXCL9//IL1B//IL6//MAP2K3//MAP3K8//MAPK1//MAPK13//MAPK3//PIK3CB//RAC1//TLR3//TLR4//TLR7//TLR8//TLR9//TNF//TOLLIP//TRAF3
mmu05142	Chagas disease (American trypanosomiasis) - Mus musculus (mouse)	http://www.genome.jp/kegg-bin/show_pathway?mmu05142+23797+12262+12266+20296+12503+12633+14678+14680+16153+16176+16193+26413+26415+26417+74769+18795+18798+21898+81897+21926+21937	0.00573452	21	877	102	7584	0.0512407	2.2415	AKT3//C1QC//C3//CCL2//CD247//CFLAR//GNAI2//GNAL//IL10//IL1B//IL6//MAPK1//MAPK13//MAPK3//PIK3CB//PLCB1//PLCB4//TLR4//TLR9//TNF//TNFRSF1A
mmu04970	Salivary secretion - Mus musculus (mouse)	http://www.genome.jp/kegg-bin/show_pathway?mmu04970+104110+224129+11548+11554+11941+381290+12182+12315+70405+12796+60596+54195+16531+17110+18795+18798+18750	0.00599222	17	877	77	7584	0.0515528	2.22241	ADCY4//ADCY5//ADRA1B//ADRB1//ATP2B2//ATP2B4//BST1//CALM3//CALML3//CAMP//GUCY1A3//GUCY1B3//KCNMA1//LYZ1//PLCB1//PLCB4//PRKCA
mmu04664	Fc epsilon RI signaling pathway - Mus musculus (mouse)	http://www.genome.jp/kegg-bin/show_pathway?mmu04664+23797+14125+16189+16331+16822+17096+26397+26413+26415+26417+18176+74769+18783+18750+19353+21926	0.00614168	16	877	71	7584	0.0515528	2.21171	AKT3//FCER1A//IL4//INPP5D//LCP2//LYN//MAP2K3//MAPK1//MAPK13//MAPK3//NRAS//PIK3CB//PLA2G4A//PRKCA//RAC1//TNF
mmu05414	Dilated cardiomyopathy - Mus musculus (mouse)	http://www.genome.jp/kegg-bin/show_pathway?mmu05414+104110+224129+11554+54652+56808+109700+16403+16410+16416+192897+16419+17868+17888+17897+20541+21926+22003+22004+22138	0.00633106	19	877	90	7584	0.0515795	2.19852	ADCY4//ADCY5//ADRB1//CACNA1F//CACNA2D2//ITGA1//ITGA6//ITGAV//ITGB3//ITGB4//ITGB5//MYBPC3//MYH6//MYL3//SLC8A1//TNF//TPM1//TPM2//TTN
mmu04910	Insulin signaling pathway - Mus musculus (mouse)	http://www.genome.jp/kegg-bin/show_pathway?mmu04910+23797+12315+70405+12402+13684+13685+15277+212032+16332+26413+26417+18176+54611+102093+74769+19046+244416+228966+108097+108099+19088+18759+110095+216148+271849+216233+106628	0.00658009	27	877	143	7584	0.0520767	2.18177	AKT3//CALM3//CALML3//CBL//EIF4E//EIF4EBP1//HK2//HK3//INPPL1//MAPK1//MAPK3//NRAS//PDE3A//PHKB//PIK3CB//PPP1CB//PPP1R3B//PPP1R3D//PRKAB2//PRKAG2//PRKAR2B//PRKCI//PYGL//SHC2//SHC4//SOCS2//TRIP10
mmu04916	Melanogenesis - Mus musculus (mouse)	http://www.genome.jp/kegg-bin/show_pathway?mmu04916+104110+224129+12315+70405+12322+12323+12913+13614+14362+14369+14678+16590+26413+26417+17342+18176+18795+18798+18750+21416	0.00959215	20	877	100	7584	0.0702164	2.01808	ADCY4//ADCY5//CALM3//CALML3//CAMK2A//CAMK2B//CREB3//EDN1//FZD1//FZD7//GNAI2//KIT//MAPK1//MAPK3//MITF//NRAS//PLCB1//PLCB4//PRKCA//TCF7L2
mmu04512	ECM-receptor interaction - Mus musculus (mouse)	http://www.genome.jp/kegg-bin/show_pathway?mmu04512+12505+16423+12842+12843+94216+14723+14724+14729+109700+16403+16410+16416+192897+16419+16776+226519+21825+22371	0.00959379	18	877	87	7584	0.0702164	2.01801	CD44//CD47//COL1A1//COL1A2//COL4A6//GP1BA//GP1BB//GP5//ITGA1//ITGA6//ITGAV//ITGB3//ITGB4//ITGB5//LAMA5//LAMC1//THBS1//VWF
mmu04390	Hippo signaling pathway - Mus musculus (mouse)	http://www.genome.jp/kegg-bin/show_pathway?mmu04390+11576+27494+12006+11799+12156+12162+12166+12443+12445+13383+13385+14362+14369+15901+15902+16415+56217+19046+18759+21416+21676+21677+209456+22062+101543+97064+22601+22628	0.00963257	28	877	154	7584	0.0702164	2.01626	AFP//AMOT//AXIN2//BIRC5//BMP2//BMP7//BMPR1A//CCND1//CCND3//DLG1//DLG4//FZD1//FZD7//ID1//ID2//ITGB2L//MPP5//PPP1CB//PRKCI//TCF7L2//TEAD1//TEAD2//TRP53BP2//TRP73//WTIP//WWTR1//YAP1//YWHAG
mmu04728	Dopaminergic synapse - Mus musculus (mouse)	http://www.genome.jp/kegg-bin/show_pathway?mmu04728+224129+23797+12315+70405+12322+12323+12753+12913+231991+13195+13489+14678+14680+14701+14706+14708+16574+109731+26415+18795+18798+19046+18750+214084+21823	0.0101416	25	877	134	7584	0.0720315	1.99389	ADCY5//AKT3//CALM3//CALML3//CAMK2A//CAMK2B//CLOCK//CREB3//CREB5//DDC//DRD2//GNAI2//GNAL//GNG12//GNG4//GNG7//KIF5C//MAOB//MAPK13//PLCB1//PLCB4//PPP1CB//PRKCA//SLC18A2//TH
mmu04540	Gap junction - Mus musculus (mouse)	http://www.genome.jp/kegg-bin/show_pathway?mmu04540+104110+224129+11554+12534+13489+14678+60596+54195+26413+26417+18176+18795+18798+18750+21872+22146+73710+22152	0.0107992	18	877	88	7584	0.0747844	1.96661	ADCY4//ADCY5//ADRB1//CDK1//DRD2//GNAI2//GUCY1A3//GUCY1B3//MAPK1//MAPK3//NRAS//PLCB1//PLCB4//PRKCA//TJP1//TUBA1C//TUBB2B//TUBB3
mmu04912	GnRH signaling pathway - Mus musculus (mouse)	http://www.genome.jp/kegg-bin/show_pathway?mmu04912+104110+224129+54652+12315+70405+12322+12323+15200+26397+26413+26415+26417+18176+18783+18795+18798+18805+18750	0.012122	18	877	89	7584	0.0818974	1.91643	ADCY4//ADCY5//CACNA1F//CALM3//CALML3//CAMK2A//CAMK2B//HBEGF//MAP2K3//MAPK1//MAPK13//MAPK3//NRAS//PLA2G4A//PLCB1//PLCB4//PLD1//PRKCA
mmu04621	NOD-like receptor signaling pathway - Mus musculus (mouse)	http://www.genome.jp/kegg-bin/show_pathway?mmu04621+20296+14825+20310+16176+16193+26413+26415+26417+54483+17952+637515+257632+21926	0.0134374	13	877	58	7584	0.0865619	1.87169	CCL2//CXCL1//CXCL2//IL1B//IL6//MAPK1//MAPK13//MAPK3//MEFV//NAIP6//NLRP1B//NOD2//TNF
mmu05134	Legionellosis - Mus musculus (mouse)	http://www.genome.jp/kegg-bin/show_pathway?mmu05134+12266+14825+20310+330122+13627+193740+16176+16193+16409+16415+17952+21898+21926	0.0134374	13	877	58	7584	0.0865619	1.87169	C3//CXCL1//CXCL2//CXCL3//EEF1A1//HSPA1A//IL1B//IL6//ITGAM//ITGB2L//NAIP6//TLR4//TNF
mmu05203	Viral carcinogenesis - Mus musculus (mouse)	http://www.genome.jp/kegg-bin/show_pathway?mmu05203+12266+12443+12445+12447+12773+12774+12776+12534+12578+12579+12913+231991+13383+19106+227753+15006+56233+79221+319177+68024+319179+319181+665596+69386+319158+319189+319190+17000+17096+26413+26417+18176+74769+19353+20259+27401+22031+22628	0.0150716	38	877	231	7584	0.0936471	1.82184	C3//CCND1//CCND3//CCNE1//CCR4//CCR5//CCR8//CDK1//CDKN2A//CDKN2B//CREB3//CREB5//DLG1//EIF2AK2//GSN//H2-Q1//HDAC7//HDAC9//HIST1H2BA//HIST1H2BC//HIST1H2BE//HIST1H2BG//HIST1H2BQ//HIST1H4H//HIST1H4I//HIST2H2BB//HIST2H2BE//LTBR//LYN//MAPK1//MAPK3//NRAS//PIK3CB//RAC1//SCIN//SKP2//TRAF3//YWHAG
mmu05321	Inflammatory bowel disease (IBD) - Mus musculus (mouse)	http://www.genome.jp/kegg-bin/show_pathway?mmu05321+20371+16153+16171+16176+16189+16190+16193+17132+257632+19883+19885+21898+21926	0.0154689	13	877	59	7584	0.0936471	1.81054	FOXP3//IL10//IL17A//IL1B//IL4//IL4RA//IL6//MAF//NOD2//RORA//RORC//TLR4//TNF
mmu05143	African trypanosomiasis - Mus musculus (mouse)	http://www.genome.jp/kegg-bin/show_pathway?mmu05143+16153+16176+16193+18795+18798+18750+81897+21926+22329	0.0155515	9	877	35	7584	0.0936471	1.80823	IL10//IL1B//IL6//PLCB1//PLCB4//PRKCA//TLR9//TNF//VCAM1
mmu04114	Oocyte meiosis - Mus musculus (mouse)	http://www.genome.jp/kegg-bin/show_pathway?mmu04114+104110+224129+99152+20878+12235+12315+70405+12322+12323+268697+12442+12447+12534+16001+26413+26417+18817+19046+30939+50878+22628	0.0165898	21	877	112	7584	0.0965165	1.78016	ADCY4//ADCY5//ANAPC2//AURKA//BUB1//CALM3//CALML3//CAMK2A//CAMK2B//CCNB1//CCNB2//CCNE1//CDK1//IGF1R//MAPK1//MAPK3//PLK1//PPP1CB//PTTG1//STAG3//YWHAG
mmu05140	Leishmaniasis - Mus musculus (mouse)	http://www.genome.jp/kegg-bin/show_pathway?mmu05140+12266+14129+16153+16176+16189+16409+16415+26413+26415+26417+17970+19225+21898+21926	0.0169749	14	877	66	7584	0.0965165	1.77019	C3//FCGR1//IL10//IL1B//IL4//ITGAM//ITGB2L//MAPK1//MAPK13//MAPK3//NCF2//PTGS2//TLR4//TNF
mmu04380	Osteoclast differentiation - Mus musculus (mouse)	http://www.genome.jp/kegg-bin/show_pathway?mmu04380+23797+12977+12978+14129+14284+16176+16177+16416+16822+18726+26413+26415+26417+17342+17970+74769+19353+19261+320832+668101+21926+21937+83433	0.0170733	23	877	126	7584	0.0965165	1.76768	AKT3//CSF1//CSF1R//FCGR1//FOSL2//IL1B//IL1R1//ITGB3//LCP2//LILRA6//MAPK1//MAPK13//MAPK3//MITF//NCF2//PIK3CB//RAC1//SIRPA//SIRPB1A//SIRPB1B//TNF//TNFRSF1A//TREM2
mmu04726	Serotonergic synapse - Mus musculus (mouse)	http://www.genome.jp/kegg-bin/show_pathway?mmu04726+224129+11689+11820+54652+226105+230459+13195+14678+14701+14706+14708+15566+109731+26413+26417+18176+18783+18795+18798+18750+19225+214084+15567+22063	0.018745	24	877	134	7584	0.103292	1.72711	ADCY5//ALOX5//APP//CACNA1F//CYP2C70//CYP2J13//DDC//GNAI2//GNG12//GNG4//GNG7//HTR7//MAOB//MAPK1//MAPK3//NRAS//PLA2G4A//PLCB1//PLCB4//PRKCA//PTGS2//SLC18A2//SLC6A4//TRPC1
mmu00601	Glycosphingolipid biosynthesis - lacto and neolacto series - Mus musculus (mouse)	http://www.genome.jp/kegg-bin/show_pathway?mmu00601+53625+72297+56375+14345+14347+14538+20443	0.0199711	7	877	25	7584	0.103292	1.6996	B3GNT2//B3GNT3//B4GALT4//FUT4//FUT7//GCNT2//ST3GAL4
mmu04725	Cholinergic synapse - Mus musculus (mouse)	http://www.genome.jp/kegg-bin/show_pathway?mmu04725+104110+224129+23797+54652+12322+12323+12647+108015+12913+231991+14678+14701+14706+14708+26413+26417+18176+74769+18795+18798+18750	0.020009	21	877	114	7584	0.103292	1.69878	ADCY4//ADCY5//AKT3//CACNA1F//CAMK2A//CAMK2B//CHAT//CHRNB4//CREB3//CREB5//GNAI2//GNG12//GNG4//GNG7//MAPK1//MAPK3//NRAS//PIK3CB//PLCB1//PLCB4//PRKCA
mmu04012	ErbB signaling pathway - Mus musculus (mouse)	http://www.genome.jp/kegg-bin/show_pathway?mmu04012+23797+12322+12323+12402+13685+15200+26413+26417+18176+211323+100042150+83961+70584+74769+18750+216148+271849	0.0201018	17	877	87	7584	0.103292	1.69677	AKT3//CAMK2A//CAMK2B//CBL//EIF4EBP1//HBEGF//MAPK1//MAPK3//NRAS//NRG1//NRG2//NRG4//PAK4//PIK3CB//PRKCA//SHC2//SHC4
mmu04144	Endocytosis - Mus musculus (mouse)	http://www.genome.jp/kegg-bin/show_pathway?mmu04144+11554+110355+71770+66251+13196+211914+12390+12402+12774+12978+13132+13429+13660+98878+71889+14183+14186+14254+14275+15006+193740+16001+16184+245666+16396+16542+16590+16835+18805+18759+234353+75767+52055+66313+56324+84092	0.0203263	36	877	221	7584	0.103292	1.69194	ADRB1//ADRBK1//AP2B1//ARFGAP3//ASAP1//ASAP2//CAV2//CBL//CCR5//CSF1R//DAB2//DNM1//EHD1//EHD4//EPN3//FGFR2//FGFR4//FLT1//FOLR1//H2-Q1//HSPA1A//IGF1R//IL2RA//IQSEC2//ITCH//KDR//KIT//LDLR//PLD1//PRKCI//PSD3//RAB11FIP1//RAB11FIP5//SMURF2//STAM2//USP8
mmu05220	Chronic myeloid leukemia - Mus musculus (mouse)	http://www.genome.jp/kegg-bin/show_pathway?mmu05220+23797+12048+110279+12402+12443+12578+13017+242705+26413+26417+18176+74769+19247+216148+271849	0.0205092	15	877	74	7584	0.103292	1.68805	AKT3//BCL2L1//BCR//CBL//CCND1//CDKN2A//CTBP2//E2F2//MAPK1//MAPK3//NRAS//PIK3CB//PTPN11//SHC2//SHC4
mmu05030	Cocaine addiction - Mus musculus (mouse)	http://www.genome.jp/kegg-bin/show_pathway?mmu05030+224129+12569+12913+231991+13195+13385+13489+14678+109731+214084+21823	0.0217931	11	877	49	7584	0.107798	1.66168	ADCY5//CDK5R1//CREB3//CREB5//DDC//DLG4//DRD2//GNAI2//MAOB//SLC18A2//TH
mmu04914	Progesterone-mediated oocyte maturation - Mus musculus (mouse)	http://www.genome.jp/kegg-bin/show_pathway?mmu04914+104110+224129+23797+99152+12235+268697+12442+12531+12534+14678+16001+26413+26415+26417+54611+74769+18817	0.0223291	17	877	88	7584	0.108512	1.65113	ADCY4//ADCY5//AKT3//ANAPC2//BUB1//CCNB1//CCNB2//CDC25B//CDK1//GNAI2//IGF1R//MAPK1//MAPK13//MAPK3//PDE3A//PIK3CB//PLK1
mmu04721	Synaptic vesicle cycle - Mus musculus (mouse)	http://www.genome.jp/kegg-bin/show_pathway?mmu04721+71770+11964+66144+66237+12890+13429+108124+214084+20614+56216+13852+20908+22249	0.0229761	13	877	62	7584	0.109731	1.63872	AP2B1//ATP6V1A//ATP6V1F//ATP6V1G2//CPLX2//DNM1//NAPA//SLC18A2//SNAP25//STX1B//STX2//STX3//UNC13B
mmu04115	p53 signaling pathway - Mus musculus (mouse)	http://www.genome.jp/kegg-bin/show_pathway?mmu04115+107831+268697+12442+12443+12445+12447+12534+12578+29870+64058+26374+20135+21825+22062	0.0244955	14	877	69	7584	0.115004	1.61091	BAI1//CCNB1//CCNB2//CCND1//CCND3//CCNE1//CDK1//CDKN2A//GTSE1//PERP//RFWD2//RRM2//THBS1//TRP73
mmu04919	Thyroid hormone signaling pathway - Mus musculus (mouse)	http://www.genome.jp/kegg-bin/show_pathway?mmu04919+23797+12443+16410+16416+26413+26417+19014+327987+26896+17888+17977+18128+18176+56421+74769+18795+18798+18750+20183+72472+58807	0.0284629	21	877	118	7584	0.12794	1.54572	AKT3//CCND1//ITGAV//ITGB3//MAPK1//MAPK3//MED1//MED13//MED14//MYH6//NCOA1//NOTCH1//NRAS//PFKP//PIK3CB//PLCB1//PLCB4//PRKCA//RXRG//SLC16A10//SLCO1C1
mmu04610	Complement and coagulation cascades - Mus musculus (mouse)	http://www.genome.jp/kegg-bin/show_pathway?mmu04610+12262+50909+12263+12266+12268+69379+14962+12628+14058+74145+14066+14067+18792+18816+22371	0.0286363	15	877	77	7584	0.12794	1.54308	C1QC//C1RA//C2//C3//C4B//C8G//CFB//CFH//F10//F13A1//F3//F5//PLAU//SERPINF2//VWF
mmu05100	Bacterial invasion of epithelial cells - Mus musculus (mouse)	http://www.genome.jp/kegg-bin/show_pathway?mmu05100+12390+12402+13043+13429+330662+16202+74769+19353+24050+20362+216148+271849+83767+242687+73178	0.0286363	15	877	77	7584	0.12794	1.54308	CAV2//CBL//CTTN//DNM1//DOCK1//ILK//PIK3CB//RAC1//SEPT3//SEPT8//SHC2//SHC4//WASF1//WASF2//WASL
mmu04020	Calcium signaling pathway - Mus musculus (mouse)	http://www.genome.jp/kegg-bin/show_pathway?mmu04020+104110+11541+11548+11554+11941+381290+12182+54652+12315+70405+12322+12323+58861+14680+15566+18127+269999+18430+18436+228139+102093+18795+18798+18750+19204+11740+20541+110891+110893+21337	0.0297518	30	877	183	7584	0.130097	1.52649	ADCY4//ADORA2B//ADRA1B//ADRB1//ATP2B2//ATP2B4//BST1//CACNA1F//CALM3//CALML3//CAMK2A//CAMK2B//CYSLTR1//GNAL//HTR7//NOS3//ORAI3//OXTR//P2RX1//P2RX3//PHKB//PLCB1//PLCB4//PRKCA//PTAFR//SLC25A5//SLC8A1//SLC8A2//SLC8A3//TACR2
mmu05322	Systemic lupus erythematosus - Mus musculus (mouse)	http://www.genome.jp/kegg-bin/show_pathway?mmu05322+12262+50909+12263+12266+12268+69379+12519+13035+50701+14129+547160+319164+319166+319177+68024+319179+319181+665596+69386+319158+319189+319190+16153+21926+20822	0.0300585	25	877	147	7584	0.130097	1.52203	C1QC//C1RA//C2//C3//C4B//C8G//CD80//CTSG//ELANE//FCGR1//GM14484//HIST1H2AC//HIST1H2AE//HIST1H2BA//HIST1H2BC//HIST1H2BE//HIST1H2BG//HIST1H2BQ//HIST1H4H//HIST1H4I//HIST2H2BB//HIST2H2BE//IL10//TNF//TROVE2
mmu05219	Bladder cancer - Mus musculus (mouse)	http://www.genome.jp/kegg-bin/show_pathway?mmu05219+12443+12578+69635+242705+26413+26417+17395+18176+21825	0.0307231	9	877	39	7584	0.130928	1.51254	CCND1//CDKN2A//DAPK1//E2F2//MAPK1//MAPK3//MMP9//NRAS//THBS1
mmu04713	Circadian entrainment - Mus musculus (mouse)	http://www.genome.jp/kegg-bin/show_pathway?mmu04713+104110+224129+12315+70405+12322+12323+14678+14701+14706+14708+60596+54195+26413+26417+17773+18795+18798+18750	0.0334897	18	877	99	7584	0.139264	1.47509	ADCY4//ADCY5//CALM3//CALML3//CAMK2A//CAMK2B//GNAI2//GNG12//GNG4//GNG7//GUCY1A3//GUCY1B3//MAPK1//MAPK3//MTNR1A//PLCB1//PLCB4//PRKCA
mmu05145	Toxoplasmosis - Mus musculus (mouse)	http://www.genome.jp/kegg-bin/show_pathway?mmu05145+23797+11689+12048+12774+14678+193740+16153+16403+16776+226519+16835+26397+26413+26415+26417+74769+21898+21926+21937+11798	0.0336847	20	877	113	7584	0.139264	1.47257	AKT3//ALOX5//BCL2L1//CCR5//GNAI2//HSPA1A//IL10//ITGA6//LAMA5//LAMC1//LDLR//MAP2K3//MAPK1//MAPK13//MAPK3//PIK3CB//TLR4//TNF//TNFRSF1A//XIAP
mmu05218	Melanoma - Mus musculus (mouse)	http://www.genome.jp/kegg-bin/show_pathway?mmu05218+23797+12443+12578+242705+14169+67112+64654+14178+16001+26413+26417+17342+18176+74769	0.0342486	14	877	72	7584	0.139513	1.46536	AKT3//CCND1//CDKN2A//E2F2//FGF14//FGF22//FGF23//FGF7//IGF1R//MAPK1//MAPK3//MITF//NRAS//PIK3CB
mmu04068	FoxO signaling pathway - Mus musculus (mouse)	http://www.genome.jp/kegg-bin/show_pathway?mmu04068+23797+12053+268697+12442+12443+12579+12581+93739+26558+16001+16153+16193+26413+26415+26417+18099+18176+74769+18817+108097+108099+27401+22035	0.0357274	23	877	135	7584	0.142559	1.447	AKT3//BCL6//CCNB1//CCNB2//CCND1//CDKN2B//CDKN2D//GABARAPL2//HOMER3//IGF1R//IL10//IL6//MAPK1//MAPK13//MAPK3//NLK//NRAS//PIK3CB//PLK1//PRKAB2//PRKAG2//SKP2//TNFSF10
mmu04010	MAPK signaling pathway - Mus musculus (mouse)	http://www.genome.jp/kegg-bin/show_pathway?mmu04010+23797+54652+56808+12531+72349+14169+67112+64654+14178+14183+14186+14701+193740+15507+16176+16177+26397+71751+26408+53608+26410+26413+26415+26417+102626+17532+18049+18099+18176+18783+18750+19259+19353+76089+233046+216965+330177+21926+21937	0.0360258	39	877	253	7584	0.142559	1.44339	AKT3//CACNA1F//CACNA2D2//CDC25B//DUSP3//FGF14//FGF22//FGF23//FGF7//FGFR2//FGFR4//GNG12//HSPA1A//HSPB1//IL1B//IL1R1//MAP2K3//MAP3K13//MAP3K5//MAP3K6//MAP3K8//MAPK1//MAPK13//MAPK3//MAPKAPK3//MRAS//NGF//NLK//NRAS//PLA2G4A//PRKCA//PTPN5//RAC1//RAPGEF2//RASGRP4//TAOK1//TAOK3//TNF//TNFRSF1A
mmu04360	Axon guidance - Mus musculus (mouse)	http://www.genome.jp/kegg-bin/show_pathway?mmu04360+319713+69632+13176+65254+13838+13839+13845+14159+14678+26413+26417+18176+70584+243743+140570+54712+19353+223881+20353+214968+14270+259302	0.0389724	22	877	129	7584	0.152047	1.40924	ABLIM3//ARHGEF12//DCC//DPYSL5//EPHA4//EPHA5//EPHB3//FES//GNAI2//MAPK1//MAPK3//NRAS//PAK4//PLXNA4//PLXNB2//PLXNC1//RAC1//RND1//SEMA4C//SEMA6D//SRGAP2//SRGAP3
mmu05031	Amphetamine addiction - Mus musculus (mouse)	http://www.genome.jp/kegg-bin/show_pathway?mmu05031+224129+12315+70405+12322+12323+12913+231991+13195+109731+19046+18750+214084+21823	0.0410283	13	877	67	7584	0.157845	1.38692	ADCY5//CALM3//CALML3//CAMK2A//CAMK2B//CREB3//CREB5//DDC//MAOB//PPP1CB//PRKCA//SLC18A2//TH
mmu00340	Histidine metabolism - Mus musculus (mouse)	http://www.genome.jp/kegg-bin/show_pathway?mmu00340+67689+11484+13195+15186+140483+109731+67011	0.0432056	7	877	29	7584	0.161729	1.36446	ALDH3B1//ASPA//DDC//HDC//HNMT//MAOB//METTL6
mmu05216	Thyroid cancer - Mus musculus (mouse)	http://www.genome.jp/kegg-bin/show_pathway?mmu05216+12443+26413+26417+18176+18510+20183+21416	0.0432056	7	877	29	7584	0.161729	1.36446	CCND1//MAPK1//MAPK3//NRAS//PAX8//RXRG//TCF7L2
mmu04730	Long-term depression - Mus musculus (mouse)	http://www.genome.jp/kegg-bin/show_pathway?mmu04730+14678+60596+54195+16001+17096+26413+26417+18176+18783+18795+18798+18750	0.0441604	12	877	61	7584	0.163099	1.35497	GNAI2//GUCY1A3//GUCY1B3//IGF1R//LYN//MAPK1//MAPK3//NRAS//PLA2G4A//PLCB1//PLCB4//PRKCA
mmu04210	Apoptosis - Mus musculus (mouse)	http://www.genome.jp/kegg-bin/show_pathway?mmu04210+23797+12048+12334+12633+12984+16176+16177+16180+18049+74769+19088+21926+21937+22035+11798	0.047111	15	877	82	7584	0.169477	1.32688	AKT3//BCL2L1//CAPN2//CFLAR//CSF2RB2//IL1B//IL1R1//IL1RAP//NGF//PIK3CB//PRKAR2B//TNF//TNFRSF1A//TNFSF10//XIAP
mmu04350	TGF-beta signaling pathway - Mus musculus (mouse)	http://www.genome.jp/kegg-bin/show_pathway?mmu04350+11477+11480+12156+12162+12166+12579+14313+15901+15902+268977+26413+26417+66313+21825+21926	0.047111	15	877	82	7584	0.169477	1.32688	ACVR1//ACVR2A//BMP2//BMP7//BMPR1A//CDKN2B//FST//ID1//ID2//LTBP1//MAPK1//MAPK3//SMURF2//THBS1//TNF
mmu04630	Jak-STAT signaling pathway - Mus musculus (mouse)	http://www.genome.jp/kegg-bin/show_pathway?mmu04630+23797+12048+12402+12443+12445+12982+12984+13857+16153+16169+237310+16184+16189+16190+16193+16196+16878+16880+17480+18413+74769+19247+216233+24063+56324	0.0490271	25	877	154	7584	0.174109	1.30956	AKT3//BCL2L1//CBL//CCND1//CCND3//CSF2RA//CSF2RB2//EPOR//IL10//IL15RA//IL22RA2//IL2RA//IL4//IL4RA//IL6//IL7//LIF//LIFR//MPL//OSM//PIK3CB//PTPN11//SOCS2//SPRY1//STAM2

## Sheet: NBXH-H vs Water_down-regulated
PathwayID	Definition	OriginalWebSite	Fisher-Pvalue	SelectionCounts	SelectionSize	Count	Size	FDR	Enrichment_Score	Genes
mmu03010	Ribosome - Mus musculus (mouse)	http://www.genome.jp/kegg-bin/show_pathway?mmu03010+667847+94061+107732+56282+27397+19935+68611+78523+66407+66258+19896+269261+270106+22121+319195+19899+76808+19921+19933+68028+68193+19941+19942+26451+19944+27367+114641+68436+619547+66489+57808+54217+19982+67671+67248+19988+19989+27176+26961+11837+20054+20055+20068+20084+20085+16898+27370+57294+20102+20104+20115+20116+16785+225215+22186	2.9616e-15	55	871	156	7584	8.20363e-13	14.5285	GM8842//MRPL1//MRPL10//MRPL12//MRPL17//MRPL23//MRPL28//MRPL9//MRPS15//MRPS17//RPL10A//RPL12//RPL13//RPL13A//RPL17//RPL18//RPL18A//RPL19//RPL21//RPL22L1//RPL24//RPL26//RPL27//RPL27A//RPL29//RPL3//RPL31//RPL34//RPL34-PS1//RPL35//RPL35A//RPL36//RPL36A//RPL38//RPL39//RPL6//RPL7//RPL7A//RPL8//RPLP0//RPS15//RPS16//RPS17//RPS18//RPS19//RPS2//RPS26//RPS27//RPS4X//RPS6//RPS7//RPS8//RPSA//RSL24D1//UBA52
mmu04722	Neurotrophin signaling pathway - Mus musculus (mouse)	http://www.genome.jp/kegg-bin/show_pathway?mmu04722+11652+11857+11911+12043+12064+12928+14388+56637+108960+266632+16476+77480+26396+23938+29857+26420+18033+18036+12070+18212+18213+18707+30955+18708+18803+18753+215449+107746+11848+20663+22059	1.51689e-05	31	871	123	7584	0.00165851	4.81905	AKT2//ARHGDIB//ATF4//BCL2//BDNF//CRK//GAB1//GSK3B//IRAK2//IRAK4//JUN//KIDINS220//MAP2K2//MAP2K5//MAPK12//MAPK9//NFKB1//NFKBIB//NGFRAP1//NTRK2//NTRK3//PIK3CD//PIK3CG//PIK3R1//PLCG1//PRKCD//RAP1B//RAPGEF1//RHOA//SOS2//TRP53
mmu05210	Colorectal cancer - Mus musculus (mouse)	http://www.genome.jp/kegg-bin/show_pathway?mmu05210+11652+11836+12005+12043+56637+16476+16842+26420+17350+17686+17869+18707+30955+18708+19354+11848+17127+21414+21813+22059	1.79621e-05	20	871	64	7584	0.00165851	4.74564	AKT2//ARAF//AXIN1//BCL2//GSK3B//JUN//LEF1//MAPK9//MLH1//MSH3//MYC//PIK3CD//PIK3CG//PIK3R1//RAC2//RHOA//SMAD3//TCF7//TGFBR2//TRP53
mmu03410	Base excision repair - Mus musculus (mouse)	http://www.genome.jp/kegg-bin/show_pathway?mmu03410+16882+17193+268395+70603+72774+18207+11545+11546+18972+69745+59001+56626+71726+21665	3.00331e-05	14	871	37	7584	0.00171107	4.5224	LIG3//MBD4//MPG//MUTYH//NEIL1//NTHL1//PARP1//PARP2//POLD2//POLD4//POLE3//POLL//SMUG1//TDG
mmu03013	RNA transport - Mus musculus (mouse)	http://www.genome.jp/kegg-bin/show_pathway?mmu03013+56215+53817+26905+27979+16341+53356+68135+54709+75705+230861+217869+68626+14265+276919+67242+69731+408192+433702+97112+69912+231042+53319+56698+66161+117109+19826+67053+67676+208366+110379+20595+51796+20901+170930+73666+108989+22196+67031	3.39109e-05	38	871	170	7584	0.00171107	4.46966	ACIN1//DDX39B//EIF2S3X//EIF3B//EIF3E//EIF3G//EIF3H//EIF3I//EIF4B//EIF4G3//EIF5//ELAC2//FMR1//GEMIN4//GEMIN6//GEMIN7//GM9839//NCBP1//NMD3//NUP43//NUPL2//NXF1//PHAX//POP4//POP5//RNPS1//RPP14//RPP21//RPP40//SEC13//SMN1//SRRM1//STRAP//SUMO2//THOC3//TPR//UBE2I//UPF3A
mmu04660	T cell receptor signaling pathway - Mus musculus (mouse)	http://www.genome.jp/kegg-bin/show_pathway?mmu04660+11652+108723+12503+12487+12500+12501+12504+12525+12567+56637+16476+26396+29857+26420+18033+18036+18707+30955+18708+18803+19057+18761+19264+11848+20663+57257+22637	4.35335e-05	27	871	106	7584	0.00171107	4.36118	AKT2//CARD11//CD247//CD28//CD3D//CD3E//CD4//CD8A//CDK4//GSK3B//JUN//MAP2K2//MAPK12//MAPK9//NFKB1//NFKBIB//PIK3CD//PIK3CG//PIK3R1//PLCG1//PPP3CC//PRKCQ//PTPRC//RHOA//SOS2//VAV3//ZAP70
mmu00230	Purine metabolism - Mus musculus (mouse)	http://www.genome.jp/kegg-bin/show_pathway?mmu00230+11486+104111+11513+11534+229665+76025+27369+18605+14450+239134+14923+18102+18103+79059+54369+76952+67054+18573+18576+238871+237823+18969+18972+69745+59001+20019+20017+20021+66420+69920+218832+69870+78929+19076+328099+110639+382985+66136	4.45743e-05	38	871	172	7584	0.00171107	4.35091	ADA//ADCY3//ADCY7//ADK//AMPD1//CANT1//DGUOK//ENPP1//GART//GUCY1B2//GUK1//NME1//NME2//NME3//NME6//NT5C2//PAICS//PDE1A//PDE3B//PDE4D//PFAS//POLA2//POLD2//POLD4//POLE3//POLR1A//POLR1B//POLR2C//POLR2E//POLR2I//POLR3A//POLR3GL//POLR3H//PRIM2//PRPS1L3//PRPS2//RRM2B//ZNRD1
mmu00240	Pyrimidine metabolism - Mus musculus (mouse)	http://www.genome.jp/kegg-bin/show_pathway?mmu00240+76025+51797+55936+320685+56749+18102+18103+79059+54369+76952+18969+18972+69745+59001+20019+20017+20021+66420+69920+218832+69870+78929+19076+382985+57813+66136	4.94172e-05	26	871	101	7584	0.00171107	4.30612	CANT1//CTPS//CTPS2//DCTD//DHODH//NME1//NME2//NME3//NME6//NT5C2//POLA2//POLD2//POLD4//POLE3//POLR1A//POLR1B//POLR2C//POLR2E//POLR2I//POLR3A//POLR3GL//POLR3H//PRIM2//RRM2B//TK2//ZNRD1
mmu05340	Primary immunodeficiency - Mus musculus (mouse)	http://www.genome.jp/kegg-bin/show_pathway?mmu05340+11486+12500+12501+12504+12518+12525+16061+16186+19264+21354+57916+72049+22637	0.000101648	13	871	36	7584	0.00312849	3.9929	ADA//CD3D//CD3E//CD4//CD79A//CD8A//IGH-VJ558//IL2RG//PTPRC//TAP1//TNFRSF13B//TNFRSF13C//ZAP70
mmu03040	Spliceosome - Mus musculus (mouse)	http://www.genome.jp/kegg-bin/show_pathway?mmu03040+56215+11834+66070+53817+72047+13207+20624+15382+229279+15387+57905+67678+78651+76522+433702+53317+56031+54633+66921+68879+66125+66585+107686+67332+68011+20384+68592+73666+108121+28035+66492	0.000120377	31	871	136	7584	0.00333444	3.91946	ACIN1//AQR//CWC15//DDX39B//DDX42//DDX5//EFTUD2//HNRNPA1//HNRNPA3//HNRNPK//ISY1//LSM3//LSM6//NAA38//NCBP1//PLRG1//PPIE//PQBP1//PRPF38B//PRPF6//SF3B5//SNRNP40//SNRPD2//SNRPD3//SNRPG//SRSF5//SYF2//THOC3//U2AF1//USP39//ZMAT2
mmu05213	Endometrial cancer - Mus musculus (mouse)	http://www.genome.jp/kegg-bin/show_pathway?mmu05213+11652+11836+12005+13645+56637+16842+26396+17350+17869+18707+30955+18708+19211+20663+21414+22059	0.000150673	16	871	52	7584	0.00379423	3.82196	AKT2//ARAF//AXIN1//EGF//GSK3B//LEF1//MAP2K2//MLH1//MYC//PIK3CD//PIK3CG//PIK3R1//PTEN//SOS2//TCF7//TRP53
mmu05166	HTLV-I infection - Mus musculus (mouse)	http://www.genome.jp/kegg-bin/show_pathway?mmu05166+104111+11513+11652+59008+11909+11911+12500+12501+66440+217232+12567+12914+382056+74343+13542+13544+13555+13714+23871+23872+56310+56637+14960+14998+15000+15001+15002+15007+15013+16186+16476+14534+26398+17869+73181+18033+18034+18707+30955+18708+18972+69745+59001+19057+17127+21423+21813+72049+22059+234729+22409	0.000485691	51	871	280	7584	0.0110035	3.31364	ADCY3//ADCY7//AKT2//ANAPC5//ATF2//ATF4//CD3D//CD3E//CDC26//CDC27//CDK4//CREBBP//CRTC1//CRTC2//DVL1//DVL3//E2F1//ELK4//ETS1//ETS2//GPS2//GSK3B//H2-AA//H2-DMA//H2-DMB2//H2-OA//H2-OB//H2-Q10//H2-Q2//IL2RG//JUN//KAT2A//MAP2K4//MYC//NFATC4//NFKB1//NFKB2//PIK3CD//PIK3CG//PIK3R1//POLD2//POLD4//POLE3//PPP3CC//SMAD3//TCF3//TGFBR2//TNFRSF13C//TRP53//VAC14//WNT10A
mmu04662	B cell receptor signaling pathway - Mus musculus (mouse)	http://www.genome.jp/kegg-bin/show_pathway?mmu04662+11652+108723+12517+12518+15985+56637+16061+16476+26396+18033+18036+83490+18707+30955+18708+19057+19354+20663+57257	0.00051641	19	871	74	7584	0.0110035	3.28701	AKT2//CARD11//CD72//CD79A//CD79B//GSK3B//IGH-VJ558//JUN//MAP2K2//NFKB1//NFKBIB//PIK3AP1//PIK3CD//PIK3CG//PIK3R1//PPP3CC//RAC2//SOS2//VAV3
mmu05164	Influenza A - Mus musculus (mouse)	http://www.genome.jp/kegg-bin/show_pathway?mmu05164+11652+11909+20304+54188+12914+53817+230073+27103+56637+14960+14998+15000+15001+15002+232989+404549+15975+56489+16175+266632+16476+16646+26396+26398+29857+26420+18033+18036+53319+18707+30955+18708+66824+24014	0.000788525	34	871	170	7584	0.0156015	3.10318	AKT2//ATF2//CCL5//CPSF4//CREBBP//DDX39B//DDX58//EIF2AK4//GSK3B//H2-AA//H2-DMA//H2-DMB2//H2-OA//H2-OB//HNRNPUL1//IFNA14//IFNAR1//IKBKE//IL1A//IRAK4//JUN//KPNA1//MAP2K2//MAP2K4//MAPK12//MAPK9//NFKB1//NFKBIB//NXF1//PIK3CD//PIK3CG//PIK3R1//PYCARD//RNASEL
mmu05211	Renal cell carcinoma - Mus musculus (mouse)	http://www.genome.jp/kegg-bin/show_pathway?mmu05211+11652+11836+12914+12928+112405+112407+23871+14388+16476+26396+18707+30955+18708+215449+107746+20663+67673	0.00115578	17	871	67	7584	0.0213435	2.93712	AKT2//ARAF//CREBBP//CRK//EGLN1//EGLN3//ETS1//GAB1//JUN//MAP2K2//PIK3CD//PIK3CG//PIK3R1//RAP1B//RAPGEF1//SOS2//TCEB2
mmu05169	Epstein-Barr virus infection - Mus musculus (mouse)	http://www.genome.jp/kegg-bin/show_pathway?mmu05169+11652+11909+12043+12914+12995+230073+27103+14128+56637+229906+68153+15007+15013+433759+16061+16476+26398+29857+26420+17869+18033+18034+18036+18707+30955+18708+18803+20021+66420+69920+218832+69870+78929+21762+19231+19664+20422+20848+22059+22630	0.00126544	40	871	215	7584	0.0219079	2.89776	AKT2//ATF2//BCL2//CREBBP//CSNK2A1//DDX58//EIF2AK4//FCER2A//GSK3B//GTF2B//GTF2E2//H2-Q10//H2-Q2//HDAC1//IGH-VJ558//JUN//MAP2K4//MAPK12//MAPK9//MYC//NFKB1//NFKB2//NFKBIB//PIK3CD//PIK3CG//PIK3R1//PLCG1//POLR2C//POLR2E//POLR2I//POLR3A//POLR3GL//POLR3H//PSMD2//PTMA//RBPJ//SHFM1//STAT3//TRP53//YWHAQ
mmu04919	Thyroid hormone signaling pathway - Mus musculus (mouse)	http://www.genome.jp/kegg-bin/show_pathway?mmu04919+11652+11931+12914+13982+56458+56637+433759+14534+26396+19014+76199+26896+23989+68975+67381+17869+17979+18128+18640+18707+30955+18708+18795+18803+22059	0.00163496	25	871	118	7584	0.0256483	2.78649	AKT2//ATP1B1//CREBBP//ESR1//FOXO1//GSK3B//HDAC1//KAT2A//MAP2K2//MED1//MED13L//MED14//MED24//MED27//MED4//MYC//NCOA3//NOTCH1//PFKFB2//PIK3CD//PIK3CG//PIK3R1//PLCB1//PLCG1//TRP53
mmu03008	Ribosome biogenesis in eukaryotes - Mus musculus (mouse)	http://www.genome.jp/kegg-bin/show_pathway?mmu03008+12995+14000+16418+14791+30877+97112+230082+66181+67134+53319+66161+117109+59028+104444+208366+57815+72554+105372+225348+24127	0.00166668	20	871	87	7584	0.0256483	2.77815	CSNK2A1//DROSHA//EIF6//EMG1//GNL3//NMD3//NOL6//NOP10//NOP56//NXF1//POP4//POP5//RCL1//REXO2//RPP40//SPATA5//UTP14A//UTP15//WDR36//XRN1
mmu05215	Prostate cancer - Mus musculus (mouse)	http://www.genome.jp/kegg-bin/show_pathway?mmu05215+11652+11836+11911+12043+12914+13555+13645+56458+56637+14870+16842+26396+18033+18707+30955+18708+19211+20663+21414+22059	0.00222791	20	871	89	7584	0.0324806	2.6521	AKT2//ARAF//ATF4//BCL2//CREBBP//E2F1//EGF//FOXO1//GSK3B//GSTP1//LEF1//MAP2K2//NFKB1//PIK3CD//PIK3CG//PIK3R1//PTEN//SOS2//TCF7//TRP53
mmu04672	Intestinal immune network for IgA production - Mus musculus (mouse)	http://www.genome.jp/kegg-bin/show_pathway?mmu04672+12769+12487+12767+14960+14998+15000+15001+15002+16061+57916+72049+21935	0.00254073	12	871	43	7584	0.0351891	2.59504	CCR9//CD28//CXCR4//H2-AA//H2-DMA//H2-DMB2//H2-OA//H2-OB//IGH-VJ558//TNFRSF13B//TNFRSF13C//TNFRSF17
mmu03020	RNA polymerase - Mus musculus (mouse)	http://www.genome.jp/kegg-bin/show_pathway?mmu03020+20019+20017+20021+66420+69920+218832+69870+78929+66136	0.00303832	9	871	28	7584	0.0400769	2.51737	POLR1A//POLR1B//POLR2C//POLR2E//POLR2I//POLR3A//POLR3GL//POLR3H//ZNRD1
mmu03420	Nucleotide excision repair - Mus musculus (mouse)	http://www.genome.jp/kegg-bin/show_pathway?mmu03420+66671+72584+107986+13872+22592+23894+18972+69745+59001+69263+106344+22590	0.0038399	12	871	45	7584	0.0479302	2.41568	CCNH//CUL4B//DDB2//ERCC3//ERCC5//GTF2H2//POLD2//POLD4//POLE3//RFC3//RFC4//XPA
mmu05202	Transcriptional misregulation in cancer - Mus musculus (mouse)	http://www.genome.jp/kegg-bin/show_pathway?mmu05202+11796+140780+12455+12775+13198+13207+13714+56458+233908+626150+15081+433759+360198+319148+319149+260423+319154+16061+16409+16825+17260+70122+17869+18033+18627+18791+94315+14083+20683+21423+21813+22059+107823	0.00412835	33	871	180	7584	0.0479302	2.38422	BIRC3//BMP2K//CCNT1//CCR7//DDIT3//DDX5//ELK4//FOXO1//FUS//GM12271//H3F3B//HDAC1//HIST1H3A//HIST1H3C//HIST1H3D//HIST1H3F//HIST2H3B//IGH-VJ558//ITGAM//LDB1//MEF2C//MLLT3//MYC//NFKB1//PER2//PLAT//PRCC//PTK2//SP1//TCF3//TGFBR2//TRP53//WHSC1
mmu05161	Hepatitis B - Mus musculus (mouse)	http://www.genome.jp/kegg-bin/show_pathway?mmu05161+11652+11909+11911+54411+12043+12567+12914+107986+230073+13555+404549+15975+56489+16476+26396+26398+26420+17869+73181+18033+18707+30955+18708+19211+20848+20852+22059+22630	0.0041528	28	871	146	7584	0.0479302	2.38166	AKT2//ATF2//ATF4//ATP6AP1//BCL2//CDK4//CREBBP//DDB2//DDX58//E2F1//IFNA14//IFNAR1//IKBKE//JUN//MAP2K2//MAP2K4//MAPK9//MYC//NFATC4//NFKB1//PIK3CD//PIK3CG//PIK3R1//PTEN//STAT3//STAT6//TRP53//YWHAQ
mmu05162	Measles - Mus musculus (mouse)	http://www.genome.jp/kegg-bin/show_pathway?mmu05162+11652+170770+12487+12500+12501+12567+12995+230073+27103+68135+56637+404549+15975+16061+56489+16175+16186+266632+18033+18036+18707+30955+18708+18761+56382+20848+22059	0.00446297	27	871	140	7584	0.0494497	2.35038	AKT2//BBC3//CD28//CD3D//CD3E//CDK4//CSNK2A1//DDX58//EIF2AK4//EIF3H//GSK3B//IFNA14//IFNAR1//IGH-VJ558//IKBKE//IL1A//IL2RG//IRAK4//NFKB1//NFKBIB//PIK3CD//PIK3CG//PIK3R1//PRKCQ//RAB9//STAT3//TRP53
mmu04666	Fc gamma R-mediated phagocytosis - Mus musculus (mouse)	http://www.genome.jp/kegg-bin/show_pathway?mmu04666+11652+56443+56378+68089+12928+94176+434782+16061+18707+30955+18708+18720+18803+18806+18753+19264+19354+58988+57257	0.00518065	19	871	89	7584	0.0543548	2.28562	AKT2//ARPC1A//ARPC3//ARPC4//CRK//DOCK2//GM5637//IGH-VJ558//PIK3CD//PIK3CG//PIK3R1//PIP5K1A//PLCG1//PLD2//PRKCD//PTPRC//RAC2//RPS6KB2//VAV3
mmu05142	Chagas disease (American trypanosomiasis) - Mus musculus (mouse)	http://www.genome.jp/kegg-bin/show_pathway?mmu05142+11652+20304+12503+12500+12501+14676+14682+266632+16476+26398+29857+26420+18033+18707+30955+18708+18795+51792+17127+21813+21899	0.00529812	21	871	102	7584	0.0543548	2.27588	AKT2//CCL5//CD247//CD3D//CD3E//GNA15//GNAQ//IRAK4//JUN//MAP2K4//MAPK12//MAPK9//NFKB1//PIK3CD//PIK3CG//PIK3R1//PLCB1//PPP2R1A//SMAD3//TGFBR2//TLR6
mmu03015	mRNA surveillance pathway - Mus musculus (mouse)	http://www.genome.jp/kegg-bin/show_pathway?mmu03015+56215+98985+54451+54188+53817+225363+66899+14852+56422+433702+53319+74737+51792+59032+21770+19826+226517+51796+68188+67031	0.00630785	20	871	97	7584	0.0624027	2.20012	ACIN1//CLP1//CPSF3//CPSF4//DDX39B//ETF1//FIP1L1//GSPT1//HBS1L//NCBP1//NXF1//PCF11//PPP2R1A//PPP2R3C//PPP2R5D//RNPS1//SMG7//SRRM1//SYMPK//UPF3A
mmu05212	Pancreatic cancer - Mus musculus (mouse)	http://www.genome.jp/kegg-bin/show_pathway?mmu05212+11652+11836+12567+13555+13645+26420+18033+18707+30955+18708+19354+17127+20848+21813+22059	0.0078459	15	871	67	7584	0.0729708	2.10536	AKT2//ARAF//CDK4//E2F1//EGF//MAPK9//NFKB1//PIK3CD//PIK3CG//PIK3R1//RAC2//SMAD3//STAT3//TGFBR2//TRP53
mmu00562	Inositol phosphate metabolism - Mus musculus (mouse)	http://www.genome.jp/kegg-bin/show_pathway?mmu00562+104776+64436+71780+17330+240752+225326+18707+30955+18718+18720+18795+18803+19211+20975	0.00801456	14	871	61	7584	0.0729708	2.09612	ALDH6A1//INPP5E//ISYNA1//MINPP1//PIK3C2B//PIK3C3//PIK3CD//PIK3CG//PIP4K2A//PIP5K1A//PLCB1//PLCG1//PTEN//SYNJ2
mmu04066	HIF-1 signaling pathway - Mus musculus (mouse)	http://www.genome.jp/kegg-bin/show_pathway?mmu04066+11652+12043+12914+13645+112405+112407+13808+14433+16828+26396+17347+18033+18640+18707+30955+18708+18803+20104+58988+20848+67673+22042	0.00867099	22	871	113	7584	0.0729708	2.06193	AKT2//BCL2//CREBBP//EGF//EGLN1//EGLN3//ENO3//GAPDH//LDHA//MAP2K2//MKNK2//NFKB1//PFKFB2//PIK3CD//PIK3CG//PIK3R1//PLCG1//RPS6//RPS6KB2//STAT3//TCEB2//TFRC
mmu05220	Chronic myeloid leukemia - Mus musculus (mouse)	http://www.genome.jp/kegg-bin/show_pathway?mmu05220+11652+11836+12567+12928+13555+433759+26396+17869+18033+18707+30955+18708+17127+20663+21813+22059	0.00870098	16	871	74	7584	0.0729708	2.06043	AKT2//ARAF//CDK4//CRK//E2F1//HDAC1//MAP2K2//MYC//NFKB1//PIK3CD//PIK3CG//PIK3R1//SMAD3//SOS2//TGFBR2//TRP53
mmu04650	Natural killer cell mediated cytotoxicity - Mus musculus (mouse)	http://www.genome.jp/kegg-bin/show_pathway?mmu04650+11836+12503+12506+15007+15013+23900+15896+404549+15975+16061+16638+16639+17059+27007+26396+17086+18707+30955+18708+18803+19057+18646+19354+26904+20663+57257+22637	0.0087297	27	871	147	7584	0.0729708	2.059	ARAF//CD247//CD48//H2-Q10//H2-Q2//HCST//ICAM2//IFNA14//IFNAR1//IGH-VJ558//KLRA7//KLRA8//KLRB1C//KLRK1//MAP2K2//NCR1//PIK3CD//PIK3CG//PIK3R1//PLCG1//PPP3CC//PRF1//RAC2//SH2D1B1//SOS2//VAV3//ZAP70
mmu04012	ErbB signaling pathway - Mus musculus (mouse)	http://www.genome.jp/kegg-bin/show_pathway?mmu04012+11652+11836+12928+13645+14388+56637+16476+26396+26398+26420+17869+18707+30955+18708+18803+14083+58988+20663	0.00895671	18	871	87	7584	0.0729708	2.04785	AKT2//ARAF//CRK//EGF//GAB1//GSK3B//JUN//MAP2K2//MAP2K4//MAPK9//MYC//PIK3CD//PIK3CG//PIK3R1//PLCG1//PTK2//RPS6KB2//SOS2
mmu00190	Oxidative phosphorylation - Mus musculus (mouse)	http://www.genome.jp/kegg-bin/show_pathway?mmu00190+11949+66043+71679+54411+76252+66237+17706+70383+12857+12867+66445+17716+17717+17718+17720+17721+67273+69875+67184+68202+67130+68349+78330+67895+67530+22272	0.0103561	26	871	142	7584	0.081961	1.9848	ATP5C1//ATP5D//ATP5H//ATP6AP1//ATP6V0E2//ATP6V1G2//ATP8//COX10//COX4I1//COX7C//CYC1//ND1//ND2//ND3//ND4L//ND5//NDUFA10//NDUFA11//NDUFA13//NDUFA5//NDUFA6//NDUFS3//NDUFV3//PPA1//UQCRB//UQCRQ
mmu05221	Acute myeloid leukemia - Mus musculus (mouse)	http://www.genome.jp/kegg-bin/show_pathway?mmu05221+11652+11836+16842+26396+17869+18033+18707+30955+18708+58988+20663+20848+21414	0.0109956	13	871	57	7584	0.0834851	1.95878	AKT2//ARAF//LEF1//MAP2K2//MYC//NFKB1//PIK3CD//PIK3CG//PIK3R1//RPS6KB2//SOS2//STAT3//TCF7
mmu03440	Homologous recombination - Mus musculus (mouse)	http://www.genome.jp/kegg-bin/show_pathway?mmu03440+71711+18972+69745+19365+20422+381760+57434+74335	0.0111514	8	871	28	7584	0.0834851	1.95267	MUS81//POLD2//POLD4//RAD52//SHFM1//SSBP1//XRCC2//XRCC3
mmu05168	Herpes simplex infection - Mus musculus (mouse)	http://www.genome.jp/kegg-bin/show_pathway?mmu05168+20304+16149+12914+12995+26965+230073+27103+68077+14960+14998+15000+15001+15002+15007+15013+67933+15312+15387+404549+15975+56489+16476+26420+51812+18033+18036+53319+18627+24014+20384+24075+209361+21354+230979+22059	0.0116409	35	871	207	7584	0.084856	1.93401	CCL5//CD74//CREBBP//CSNK2A1//CUL1//DDX58//EIF2AK4//GLTSCR2//H2-AA//H2-DMA//H2-DMB2//H2-OA//H2-OB//H2-Q10//H2-Q2//HCFC2//HMGN1//HNRNPK//IFNA14//IFNAR1//IKBKE//JUN//MAPK9//MCRS1//NFKB1//NFKBIB//NXF1//PER2//RNASEL//SRSF5//TAF10//TAF3//TAP1//TNFRSF14//TRP53
mmu03430	Mismatch repair - Mus musculus (mouse)	http://www.genome.jp/kegg-bin/show_pathway?mmu03430+17350+17686+18972+69745+69263+106344+381760	0.012052	7	871	23	7584	0.0855998	1.91894	MLH1//MSH3//POLD2//POLD4//RFC3//RFC4//SSBP1
mmu05150	Staphylococcus aureus infection - Mus musculus (mouse)	http://www.genome.jp/kegg-bin/show_pathway?mmu05150+12628+14960+14998+15000+15001+15002+16061+16409+16661+17174+17175+20345	0.0130056	12	871	52	7584	0.0900635	1.88587	CFH//H2-AA//H2-DMA//H2-DMB2//H2-OA//H2-OB//IGH-VJ558//ITGAM//KRT10//MASP1//MASP2//SELPLG
mmu04664	Fc epsilon RI signaling pathway - Mus musculus (mouse)	http://www.genome.jp/kegg-bin/show_pathway?mmu04664+11652+16061+26396+26398+29857+26420+14126+18707+30955+18708+18803+18753+19354+20663+57257	0.0134443	15	871	71	7584	0.0908313	1.87146	AKT2//IGH-VJ558//MAP2K2//MAP2K4//MAPK12//MAPK9//MS4A2//PIK3CD//PIK3CG//PIK3R1//PLCG1//PRKCD//RAC2//SOS2//VAV3
mmu04062	Chemokine signaling pathway - Mus musculus (mouse)	http://www.genome.jp/kegg-bin/show_pathway?mmu04062+104111+11513+11652+24047+56221+20304+12771+12775+12769+12928+12767+94176+140580+14688+14710+14772+26385+56637+18033+18036+18707+30955+18708+18795+18753+14083+19354+215449+11848+20663+20848+57257+16963	0.0138472	33	871	195	7584	0.0913256	1.85864	ADCY3//ADCY7//AKT2//CCL19//CCL24//CCL5//CCR3//CCR7//CCR9//CRK//CXCR4//DOCK2//ELMO1//GNB1//GNGT2//GRK4//GRK6//GSK3B//NFKB1//NFKBIB//PIK3CD//PIK3CG//PIK3R1//PLCB1//PRKCD//PTK2//RAC2//RAP1B//RHOA//SOS2//STAT3//VAV3//XCL1
mmu05321	Inflammatory bowel disease (IBD) - Mus musculus (mouse)	http://www.genome.jp/kegg-bin/show_pathway?mmu05321+14960+14998+15000+15001+15002+16182+16175+16186+16476+18033+17127+20848+20852	0.0146629	13	871	59	7584	0.0944564	1.83378	H2-AA//H2-DMA//H2-DMB2//H2-OA//H2-OB//IL18R1//IL1A//IL2RG//JUN//NFKB1//SMAD3//STAT3//STAT6
mmu05140	Leishmaniasis - Mus musculus (mouse)	http://www.genome.jp/kegg-bin/show_pathway?mmu05140+14960+14998+15000+15001+15002+16061+16175+266632+16409+16412+16476+29857+18033+18036	0.0160581	14	871	66	7584	0.101093	1.79431	H2-AA//H2-DMA//H2-DMB2//H2-OA//H2-OB//IGH-VJ558//IL1A//IRAK4//ITGAM//ITGB1//JUN//MAPK12//NFKB1//NFKBIB
mmu05200	Pathways in cancer - Mus musculus (mouse)	http://www.genome.jp/kegg-bin/show_pathway?mmu05200+11652+11836+12005+12043+11796+12567+12914+12928+13143+13542+13544+13555+13645+112405+112407+14168+14177+14256+56458+56637+433759+16412+16476+16777+16842+26396+26420+17350+17686+17869+18033+18034+17344+18707+30955+18708+18803+19211+14083+19354+11848+17127+20663+20848+67673+21414+21813+108989+22059+22409	0.0169859	50	871	324	7584	0.104558	1.76991	AKT2//ARAF//AXIN1//BCL2//BIRC3//CDK4//CREBBP//CRK//DAPK2//DVL1//DVL3//E2F1//EGF//EGLN1//EGLN3//FGF13//FGF6//FLT3L//FOXO1//GSK3B//HDAC1//ITGB1//JUN//LAMB1//LEF1//MAP2K2//MAPK9//MLH1//MSH3//MYC//NFKB1//NFKB2//PIAS2//PIK3CD//PIK3CG//PIK3R1//PLCG1//PTEN//PTK2//RAC2//RHOA//SMAD3//SOS2//STAT3//TCEB2//TCF7//TGFBR2//TPR//TRP53//WNT10A
mmu03030	DNA replication - Mus musculus (mouse)	http://www.genome.jp/kegg-bin/show_pathway?mmu03030+17219+18969+18972+69745+59001+19076+69263+106344+381760	0.0179128	9	871	36	7584	0.107866	1.74684	MCM6//POLA2//POLD2//POLD4//POLE3//PRIM2//RFC3//RFC4//SSBP1
mmu05310	Asthma - Mus musculus (mouse)	http://www.genome.jp/kegg-bin/show_pathway?mmu05310+14960+14998+15000+15001+15002+16061+14126	0.0192865	7	871	25	7584	0.113667	1.71475	H2-AA//H2-DMA//H2-DMB2//H2-OA//H2-OB//IGH-VJ558//MS4A2
mmu00640	Propanoate metabolism - Mus musculus (mouse)	http://www.genome.jp/kegg-bin/show_pathway?mmu00640+60525+104776+110695+93747+16828+110821+56451+20917	0.0207788	8	871	31	7584	0.119911	1.68238	ACSS2//ALDH6A1//ALDH7A1//ECHS1//LDHA//PCCA//SUCLG1//SUCLG2
mmu05016	Huntington's disease - Mus musculus (mouse)	http://www.genome.jp/kegg-bin/show_pathway?mmu05016+11949+66043+71679+17706+170770+12064+12857+12867+12914+66445+67665+14682+15114+433759+67273+69875+67184+68202+67130+68349+78330+18181+18795+20021+66420+69920+20683+21780+22059+67530+22272	0.0234523	31	871	188	7584	0.132577	1.62981	ATP5C1//ATP5D//ATP5H//ATP8//BBC3//BDNF//COX4I1//COX7C//CREBBP//CYC1//DCTN4//GNAQ//HAP1//HDAC1//NDUFA10//NDUFA11//NDUFA13//NDUFA5//NDUFA6//NDUFS3//NDUFV3//NRF1//PLCB1//POLR2C//POLR2E//POLR2I//SP1//TFAM//TRP53//UQCRB//UQCRQ
mmu01212	Fatty acid metabolism - Mus musculus (mouse)	http://www.genome.jp/kegg-bin/show_pathway?mmu01212+66885+14081+74205+433256+93747+223722+26922+19063+20249+30049+106529	0.0239993	11	871	50	7584	0.132956	1.6198	ACADSB//ACSL1//ACSL3//ACSL5//ECHS1//MCAT//MECR//PPT1//SCD1//SCD3//TECR
mmu04932	Non-alcoholic fatty liver disease (NAFLD) - Mus musculus (mouse)	http://www.genome.jp/kegg-bin/show_pathway?mmu04932+11652+11911+12125+12857+12867+66445+13198+56637+16175+16476+26420+21428+58805+67273+69875+67184+68202+67130+68349+78330+18033+22259+18707+30955+18708+67530+22272	0.0251918	27	871	160	7584	0.136826	1.59874	AKT2//ATF4//BCL2L11//COX4I1//COX7C//CYC1//DDIT3//GSK3B//IL1A//JUN//MAPK9//MLX//MLXIPL//NDUFA10//NDUFA11//NDUFA13//NDUFA5//NDUFA6//NDUFS3//NDUFV3//NFKB1//NR1H3//PIK3CD//PIK3CG//PIK3R1//UQCRB//UQCRQ
mmu05223	Non-small cell lung cancer - Mus musculus (mouse)	http://www.genome.jp/kegg-bin/show_pathway?mmu05223+11652+11836+12567+13555+13645+26396+18707+30955+18708+18803+20663+22059	0.0261743	12	871	57	7584	0.139428	1.58213	AKT2//ARAF//CDK4//E2F1//EGF//MAP2K2//PIK3CD//PIK3CG//PIK3R1//PLCG1//SOS2//TRP53
mmu05100	Bacterial invasion of epithelial cells - Mus musculus (mouse)	http://www.genome.jp/kegg-bin/show_pathway?mmu05100+56443+56378+68089+12928+140580+14388+434782+16412+18707+30955+18708+14083+11848+52398+56526	0.0271159	15	871	77	7584	0.141719	1.56678	ARPC1A//ARPC3//ARPC4//CRK//ELMO1//GAB1//GM5637//ITGB1//PIK3CD//PIK3CG//PIK3R1//PTK2//RHOA//SEPT11//SEPT6
mmu01200	Carbon metabolism - Mus musculus (mouse)	http://www.genome.jp/kegg-bin/show_pathway?mmu01200+60525+11532+104776+71832+93747+13808+14121+14433+14751+269951+15929+18293+110821+66171+236539+328099+110639+20425+56451+20917	0.0290251	20	871	112	7584	0.148765	1.53723	ACSS2//ADH5//ALDH6A1//CSL//ECHS1//ENO3//FBP1//GAPDH//GPI1//IDH2//IDH3G//OGDH//PCCA//PGLS//PHGDH//PRPS1L3//PRPS2//SHMT1//SUCLG1//SUCLG2
mmu00051	Fructose and mannose metabolism - Mus musculus (mouse)	http://www.genome.jp/kegg-bin/show_pathway?mmu00051+67861+11677+14121+75540+53332+18640+29858+54128+22122	0.0295382	9	871	39	7584	0.148765	1.52962	AKR1B10//AKR1B3//FBP1//FPGT//MTMR1//PFKFB2//PMM1//PMM2//TSTA3
mmu05145	Toxoplasmosis - Mus musculus (mouse)	http://www.genome.jp/kegg-bin/show_pathway?mmu05145+11652+12043+11796+14960+14998+15000+15001+15002+266632+15944+16412+16777+29857+26420+18033+18036+18707+30955+18708+20848	0.0316127	20	871	113	7584	0.151926	1.50014	AKT2//BCL2//BIRC3//H2-AA//H2-DMA//H2-DMB2//H2-OA//H2-OB//IRAK4//IRGM1//ITGB1//LAMB1//MAPK12//MAPK9//NFKB1//NFKBIB//PIK3CD//PIK3CG//PIK3R1//STAT3
mmu04010	MAPK signaling pathway - Mus musculus (mouse)	http://www.genome.jp/kegg-bin/show_pathway?mmu04010+11652+11909+11911+12064+56808+319734+12297+12928+13198+63953+70686+319520+13645+13714+14168+14177+16175+16476+16478+26396+26398+23938+26412+29857+26420+17260+17347+17869+18033+18034+18212+19057+19354+215449+114713+20663+330177+21813+22059	0.0328254	39	871	253	7584	0.151926	1.48379	AKT2//ATF2//ATF4//BDNF//CACNA2D2//CACNA2D4//CACNB3//CRK//DDIT3//DUSP10//DUSP16//DUSP4//EGF//ELK4//FGF13//FGF6//IL1A//JUN//JUND//MAP2K2//MAP2K4//MAP2K5//MAP4K2//MAPK12//MAPK9//MEF2C//MKNK2//MYC//NFKB1//NFKB2//NTRK2//PPP3CC//RAC2//RAP1B//RASA2//SOS2//TAOK3//TGFBR2//TRP53
mmu03022	Basal transcription factors - Mus musculus (mouse)	http://www.genome.jp/kegg-bin/show_pathway?mmu03022+66671+13872+83602+229906+68153+98053+23894+24075+209361+24074	0.0330478	10	871	46	7584	0.151926	1.48086	CCNH//ERCC3//GTF2A1//GTF2B//GTF2E2//GTF2F1//GTF2H2//TAF10//TAF3//TAF7
mmu05416	Viral myocarditis - Mus musculus (mouse)	http://www.genome.jp/kegg-bin/show_pathway?mmu05416+12487+13136+13137+13138+230861+14960+14998+15000+15001+15002+15007+15013+16061+18646+19354	0.0334168	15	871	79	7584	0.151926	1.47603	CD28//CD55//DAF2//DAG1//EIF4G3//H2-AA//H2-DMA//H2-DMB2//H2-OA//H2-OB//H2-Q10//H2-Q2//IGH-VJ558//PRF1//RAC2
mmu04110	Cell cycle - Mus musculus (mouse)	http://www.genome.jp/kegg-bin/show_pathway?mmu04110+59008+66671+218294+66440+217232+12545+12567+12914+26965+27214+13555+56637+433759+17219+17869+26429+19357+19650+55948+17127+22059+22630	0.03378	22	871	128	7584	0.151926	1.47134	ANAPC5//CCNH//CDC14B//CDC26//CDC27//CDC7//CDK4//CREBBP//CUL1//DBF4//E2F1//GSK3B//HDAC1//MCM6//MYC//ORC5//RAD21//RBL1//SFN//SMAD3//TRP53//YWHAQ
mmu04640	Hematopoietic cell lineage - Mus musculus (mouse)	http://www.genome.jp/kegg-bin/show_pathway?mmu04640+12479+12481+12493+12500+12501+12504+13136+12525+13137+14128+14256+16061+16175+16409+12482+22042	0.034005	16	871	86	7584	0.151926	1.46846	CD1D1//CD2//CD37//CD3D//CD3E//CD4//CD55//CD8A//DAF2//FCER2A//FLT3L//IGH-VJ558//IL1A//ITGAM//MS4A1//TFRC
mmu05222	Small cell lung cancer - Mus musculus (mouse)	http://www.genome.jp/kegg-bin/show_pathway?mmu05222+11652+12043+11796+12567+13555+16412+16777+17869+18033+17344+18707+30955+18708+19211+14083+22059	0.034005	16	871	86	7584	0.151926	1.46846	AKT2//BCL2//BIRC3//CDK4//E2F1//ITGB1//LAMB1//MYC//NFKB1//PIAS2//PIK3CD//PIK3CG//PIK3R1//PTEN//PTK2//TRP53
mmu05214	Glioma - Mus musculus (mouse)	http://www.genome.jp/kegg-bin/show_pathway?mmu05214+11652+11836+12567+13555+13645+26396+18707+30955+18708+18803+19211+20663+22059	0.0350655	13	871	66	7584	0.154177	1.45512	AKT2//ARAF//CDK4//E2F1//EGF//MAP2K2//PIK3CD//PIK3CG//PIK3R1//PLCG1//PTEN//SOS2//TRP53
mmu05160	Hepatitis C - Mus musculus (mouse)	http://www.genome.jp/kegg-bin/show_pathway?mmu05160+11652+11836+230073+13645+27103+16341+56637+404549+15975+56489+29857+26420+18033+22259+56469+18707+30955+18708+51792+24014+20663+20848+22059	0.0359733	23	871	136	7584	0.155584	1.44402	AKT2//ARAF//DDX58//EGF//EIF2AK4//EIF3E//GSK3B//IFNA14//IFNAR1//IKBKE//MAPK12//MAPK9//NFKB1//NR1H3//PIAS1//PIK3CD//PIK3CG//PIK3R1//PPP2R1A//RNASEL//SOS2//STAT3//TRP53
mmu00785	Lipoic acid metabolism - Mus musculus (mouse)	http://www.genome.jp/kegg-bin/show_pathway?mmu00785+79464+623661	0.0365089	2	871	3	7584	0.155584	1.4376	LIAS//LIPT1
mmu04620	Toll-like receptor signaling pathway - Mus musculus (mouse)	http://www.genome.jp/kegg-bin/show_pathway?mmu04620+11652+20304+404549+15975+56489+266632+16476+26396+26398+29857+26420+18033+18707+30955+18708+20750+21897+21899	0.0376762	18	871	101	7584	0.158126	1.42393	AKT2//CCL5//IFNA14//IFNAR1//IKBKE//IRAK4//JUN//MAP2K2//MAP2K4//MAPK12//MAPK9//NFKB1//PIK3CD//PIK3CG//PIK3R1//SPP1//TLR1//TLR6
mmu00270	Cysteine and methionine metabolism - Mus musculus (mouse)	http://www.genome.jp/kegg-bin/show_pathway?mmu00270+104923+269378+13433+13436+14204+16828+232087+20810+22117	0.039724	9	871	41	7584	0.164232	1.40095	ADI1//AHCY//DNMT1//DNMT3B//IL4I1//LDHA//MAT2A//SRM//TST
mmu04064	NF-kappa B signaling pathway - Mus musculus (mouse)	http://www.genome.jp/kegg-bin/show_pathway?mmu04064+12043+11796+108723+24047+12995+230073+111173+16061+266632+16994+18033+18034+11545+18803+18761+72049+22196+22637	0.0410459	18	871	102	7584	0.167202	1.38673	BCL2//BIRC3//CARD11//CCL19//CSNK2A1//DDX58//ERC1//IGH-VJ558//IRAK4//LTB//NFKB1//NFKB2//PARP1//PLCG1//PRKCQ//TNFRSF13C//UBE2I//ZAP70
mmu00520	Amino sugar and nucleotide sugar metabolism - Mus musculus (mouse)	http://www.genome.jp/kegg-bin/show_pathway?mmu00520+12763+72017+109754+75540+14635+14751+29858+54128+22122+67883	0.0430613	10	871	48	7584	0.172869	1.36591	CMAH//CYB5R1//CYB5R3//FPGT//GALK1//GPI1//PMM1//PMM2//TSTA3//UXS1
mmu04210	Apoptosis - Mus musculus (mouse)	http://www.genome.jp/kegg-bin/show_pathway?mmu04210+11652+12043+11796+12983+13804+16175+108960+266632+18033+18707+30955+18708+19057+19087+22059	0.0447728	15	871	82	7584	0.177172	1.34899	AKT2//BCL2//BIRC3//CSF2RB//ENDOG//IL1A//IRAK2//IRAK4//NFKB1//PIK3CD//PIK3CG//PIK3R1//PPP3CC//PRKAR2A//TRP53
mmu00480	Glutathione metabolism - Mus musculus (mouse)	http://www.genome.jp/kegg-bin/show_pathway?mmu00480+110175+14776+69590+68214+14870+14869+269951+211666+66447+382985+20810	0.0454562	11	871	55	7584	0.177343	1.34241	GGCT//GPX2//GPX8//GSTO2//GSTP1//GSTP2//IDH2//MGST2//MGST3//RRM2B//SRM
mmu04623	Cytosolic DNA-sensing pathway - Mus musculus (mouse)	http://www.genome.jp/kegg-bin/show_pathway?mmu04623+20304+230073+404549+56489+18033+18036+66420+218832+69870+78929+66824+58203	0.0471157	12	871	62	7584	0.181264	1.32683	CCL5//DDX58//IFNA14//IKBKE//NFKB1//NFKBIB//POLR2E//POLR3A//POLR3GL//POLR3H//PYCARD//ZBP1
mmu04330	Notch signaling pathway - Mus musculus (mouse)	http://www.genome.jp/kegg-bin/show_pathway?mmu04330+12914+209200+13542+13544+433759+16450+14534+18128+66340+19664	0.0487684	10	871	49	7584	0.182357	1.31186	CREBBP//DTX3L//DVL1//DVL3//HDAC1//JAG2//KAT2A//NOTCH1//PSENEN//RBPJ
mmu05323	Rheumatoid arthritis - Mus musculus (mouse)	http://www.genome.jp/kegg-bin/show_pathway?mmu05323+11433+54411+76252+66237+20304+12487+14960+14998+15000+15001+15002+16061+16175+16476+16994	0.0491006	15	871	83	7584	0.182357	1.30891	ACP5//ATP6AP1//ATP6V0E2//ATP6V1G2//CCL5//CD28//H2-AA//H2-DMA//H2-DMB2//H2-OA//H2-OB//IGH-VJ558//IL1A//JUN//LTB
mmu00030	Pentose phosphate pathway - Mus musculus (mouse)	http://www.genome.jp/kegg-bin/show_pathway?mmu00030+232449+14121+14751+66171+328099+110639+71336	0.0493747	7	871	30	7584	0.182357	1.30649	DERA//FBP1//GPI1//PGLS//PRPS1L3//PRPS2//RBKS
